# Supplementary material
Source: publisher figshare collection journal article supplement (https://gsapubs.figshare.com/articles/dataset/_/14582763)
Supplement: Supplementary file 1 [file 1]

**Table DR9. Compiled Zircon U-Pb Ages of Tectonic Blocks (Karakoram)**

| Sample name                     | Zircon U-Pb Age (Ma) | Error (Ma) | Sample name                   | Zircon U-Pb Age (Ma) | Error (Ma) | Sample name | Zircon U-Pb Age (Ma) | Error (Ma) |
|---------------------------------|----------------------|------------|-------------------------------|----------------------|------------|-------------|----------------------|------------|
| <u>Parrish and Tirrul, 1989</u> |                      |            | K97- JFSG                     | 25.40                | 0.20       | R 7/17      | 76.00                | 1.00       |
| H4                              | 21.00                | 0.50       | K97- JFSG                     | 25.50                | 0.10       | R 7/17      | 79.00                | 1.00       |
| H6                              | 21.00                | 0.50       | T-85-76                       | 36.50                | 0.30       | R 7/17      | 75.00                | 1.00       |
| <u>Searle et al., 1990</u>      |                      |            | T-85-76                       | 152.60               | 1.10       | R 7/17      | 77.00                | 1.00       |
| 1                               | 133.10               | 2.00       | T-85-76                       | 37.50                | 0.20       | R 7/17      | 74.00                | 1.00       |
| 2                               | 126.80               | 2.00       | T-85-76                       | 33.30                | 0.70       | R 7/17      | 72.00                | 1.00       |
| 3                               | 124.20               | 2.40       | T-85-76                       | 26.90                | 0.40       | R 7/17      | 72.00                | 2.00       |
| 4                               | 144.20               | 2.00       | K98-6P-8-7R                   | 59.80                | 4.50       | R 7/17      | 76.00                | 1.00       |
| 5                               | 180.00               | 1.80       | K98-6P-8-5R                   | 73.00                | 5.90       | R 7/17      | 69.00                | 1.00       |
| <u>Schärer et al., 1990</u>     |                      |            | K98-6P-8-2R                   | 70.00                | 5.10       | R 7/17      | 76.00                | 1.00       |
| K-10S                           | 27.20                | 1.00       | K98-6P-8-8R                   | 57.20                | 4.20       | R 7/17      | 76.00                | 1.00       |
| K-10L                           | 33.90                | 1.00       | K98-6P-6-2R                   | 66.30                | 4.90       | R 7/17      | 72.00                | 1.00       |
| K-11S                           | 27.90                | 1.00       | K98-6P-6-5R                   | 68.00                | 5.10       | R 7/17      | 66.00                | 1.00       |
| K-11L                           | 65.70                | 1.00       | K98-6P-6-6Ri                  | 65.00                | 4.90       | SY 46/122   | 23.00                | 0.10       |
| K-21S                           | 117.00               | 1.00       | <u>Phillips et al., 2004</u>  |                      |            | SY 46/122   | 22.00                | 0.10       |
| K-21L                           | 128.00               | 1.00       | P1-1                          | 15.95                | 0.17       | SY 46/122   | 21.00                | 0.10       |
| <u>Weinberg et al., 2000</u>    |                      |            | P1-2                          | 24.43                | 0.10       | SY 46/122   | 21.00                | 0.10       |
| 96-711-1                        | 68.50                | 0.60       | P8                            | 13.72                | 0.18       | SY 46/122   | 20.00                | 0.10       |
| 96-711-2                        | 68.60                | 0.60       | P11-1                         | 19.33                | 0.16       | SY 46/122   | 19.00                | 1.00       |
| 96-711-3                        | 68.70                | 0.60       | P11-2                         | 16.00                | 0.10       | SY 46/122   | 22.00                | 0.10       |
| 96-711-4                        | 67.70                | 0.60       | P11-3                         | 19.65                | 0.05       | SY 46/122   | 21.00                | 0.10       |
| 96-711-5                        | 68.50                | 0.60       | P37-1                         | 17.95                | 0.12       | SY 46/122   | 20.00                | 0.10       |
| 96-711-6                        | 70.30                | 1.20       | P37-2                         | 25.15                | 0.18       | SY 46/122   | 21.00                | 2.00       |
| 96-711-7                        | 68.50                | 1.10       | P37-4                         | 19.57                | 0.04       | SY 46/122   | 23.00                | 0.10       |
| 96-711-8                        | 66.90                | 1.00       | P38-1                         | 18.10                | 0.12       | SY 46/122   | 23.00                | 0.10       |
| 96-711-9                        | 70.70                | 0.80       | P38-2                         | 16.25                | 0.05       | SY 46/122   | 21.00                | 0.10       |
| 96-711-10                       | 67.30                | 2.00       | P38-3                         | 18.68                | 0.06       | SY 46/122   | 20.00                | 0.10       |
| 96-711-11                       | 66.80                | 2.00       | P38-4                         | 15.87                | 0.08       | SY 46/122   | 23.00                | 1.00       |
| 96-711-12                       | 57.00                | 2.50       | <u>Heuberger et al., 2007</u> |                      |            | SY 25/65    | 19.00                | 1.00       |
| 96-711-13                       | 63.20                | 1.70       | TM1                           | 121.20               | 0.50       | SY 25/65    | 40.00                | 1.00       |
| 96-711-14                       | 65.20                | 1.60       | TM2                           | 147.30               | 0.88       | SY 25/65    | 26.00                | 1.00       |
| 96-711-15                       | 56.10                | 2.00       | TM3                           | 121.40               | 0.88       | SY 25/65    | 64.00                | 1.00       |
| 96-711-16                       | 62.50                | 2.00       | 1                             | 103.91               | 0.88       | SY 25/65    | 53.00                | 1.00       |
| 96-711-17                       | 68.80                | 1.20       | 2                             | 132.73               | 0.91       | SY 25/65    | 58.00                | 1.00       |
| 021-1                           | 14.60                | 0.60       | 3                             | 103.64               | 0.32       | SY 25/65    | 62.00                | 1.00       |
| 021-2                           | 15.30                | 0.60       | 4                             | 633.90               | 0.96       | SY 25/65    | 51.00                | 1.00       |
| 021-3                           | 14.40                | 0.80       | 5                             | 190.20               | 0.73       | SY 25/65    | 65.00                | 1.00       |
| 021-4                           | 14.40                | 0.70       | 6                             | 103.56               | 0.66       | SY 25/65    | 69.00                | 1.00       |
| 021-5                           | 15.80                | 0.60       | 7                             | 105.25               | 0.43       | SY 25/65    | 62.00                | 1.00       |
| 021-6                           | 15.40                | 0.60       | 8                             | 105.38               | 0.56       | SY 25/65    | 60.00                | 1.00       |
| 021-7                           | 717.00               | 8.70       | 9                             | 105.14               | 0.71       | SY 25/65    | 67.00                | 1.00       |
| 021-8                           | 1016.00              | 9.20       | 10                            | 107.04               | 0.51       | SY 25/65    | 57.00                | 1.00       |
| 021-9                           | 14.90                | 0.90       | 11                            | 107.21               | 0.39       | SY 25/65    | 65.00                | 1.00       |
| 021-10                          | 11.60                | 0.70       | 12                            | 106.68               | 0.62       | SY 25/65    | 65.00                | 1.00       |
| 021-11                          | 1437.00              | 33.00      | 13                            | 107.00               | 0.41       | SY 25/65    | 62.00                | 1.00       |
| 021-12                          | 743.00               | 6.20       | 14                            | 107.29               | 0.39       | SY 25/65    | 57.00                | 1.00       |
| 021-13                          | 40.80                | 0.60       | 15                            | 106.89               | 0.83       | SY 25/65    | 54.00                | 2.00       |
| <u>Fraser et al., 2001</u>      |                      |            | 16                            | 106.83               | 0.85       | SY 25/65    | 59.00                | 1.00       |
| K94-24                          | 106.00               | 0.40       | 17                            | 107.00               | 0.44       | SY 25/65    | 59.00                | 1.00       |
| K94-24                          | 105.00               | 0.90       | 18                            | 107.00               | 0.45       | SY 25/65    | 63.00                | 1.00       |
| K94-24                          | 106.00               | 0.50       | 19                            | 106.92               | 0.40       | SY 25/65    | 61.00                | 1.00       |
| K98-14                          | 48.60                | 0.30       | 20                            | 106.40               | 0.71       | SY 25/65    | 63.00                | 1.00       |
| K98-14                          | 48.10                | 0.30       | <u>Jain and Singh,2008</u>    |                      |            | SY 25/65    | 57.00                | 3.00       |
| K98-14                          | 48.50                | 0.20       | R 7/17                        | 74.00                | 2.00       | SY 25/65    | 60.00                | 1.00       |
| K98-14                          | 50.70                | 0.20       | R 7/17                        | 77.00                | 1.00       | SY 25/65    | 65.00                | 1.00       |
| K94-23                          | 34.10                | 0.20       | R 7/17                        | 61.00                | 1.00       | SY 25/65    | 56.00                | 1.00       |
| K94-23                          | 34.80                | 0.10       | R 7/17                        | 72.00                | 2.00       | SY 26/66    | 58.00                | 1.00       |
| K97- JFSG                       | 9.20                 | 0.10       | R 7/17                        | 76.00                | 1.00       | SY 26/66    | 68.00                | 1.00       |
| K97- JFSG                       | 7.10                 | 0.10       | R 7/17                        | 75.00                | 2.00       | SY 26/66    | 59.00                | 2.00       |
| K97- JFSG                       | 7.90                 | 0.10       | R 7/17                        | 76.00                | 1.00       | SY 26/66    | 60.00                | 1.00       |
| K97- JFSG                       | 19.50                | 0.20       | R 7/17                        | 71.00                | 3.00       | SY 26/66    | 62.00                | 1.00       |
|                                 |                      |            | R 7/17                        | 75.00                | 1.00       | SY 26/66    | 62.00                | 1.00       |
|                                 |                      |            | R 7/17                        | 73.00                | 1.00       | SY 26/66    | 62.00                | 1.00       |
|                                 |                      |            | R 7/17                        | 71.00                | 1.00       | SY 26/66    | 61.00                | 1.00       |

| Sample name           | Zircon U-Pb Age (Ma) | Error (Ma) | Sample name | Zircon U-Pb Age (Ma) | Error (Ma) | Sample name | Zircon U-Pb Age (Ma) | Error (Ma) |
|-----------------------|----------------------|------------|-------------|----------------------|------------|-------------|----------------------|------------|
| SY 26/66              | 61.00                | 1.00       | ST-11 09    | 90.00                | 2.00       | MgT-14 13   | 64.00                | 1.00       |
| SY 26/66              | 60.00                | 1.00       | ST-11 10    | 99.00                | 2.00       | MgT-14 14   | 58.00                | 1.00       |
| SY 26/66              | 57.00                | 1.00       | ST-11 11    | 105.00               | 2.00       | MgT-14 15   | 65.00                | 1.00       |
| SY 26/66              | 62.00                | 1.00       | ST-11 12    | 102.00               | 2.00       | MgT-14 16   | 61.00                | 1.00       |
| SY 26/66              | 60.00                | 1.00       | ST-11 13    | 98.00                | 2.00       | MgT-14 17   | 61.00                | 1.00       |
| SY 26/66              | 54.00                | 2.00       | ST-11 14    | 107.00               | 2.00       | MgT-14 18   | 65.00                | 1.00       |
| SY 26/66              | 61.00                | 1.00       | ST-11 15    | 99.00                | 2.00       | MgT-14 19   | 63.00                | 1.00       |
| SY 26/66              | 59.00                | 1.00       | ST-11 16    | 101.00               | 2.00       | MgT-14 20   | 60.00                | 1.00       |
| SY 26/66              | 45.00                | 1.00       | ST-11 17    | 99.00                | 2.00       | MgT-15 01   | 57.00                | 4.00       |
| SY 26/66              | 61.00                | 1.00       | ST-11 18    | 96.00                | 2.00       | MgT-15 02   | 55.00                | 1.00       |
| SY 26/66              | 57.00                | 1.00       | ST-11 19    | 102.00               | 2.00       | MgT-15 03   | 57.00                | 1.00       |
| SY 26/66              | 61.00                | 1.00       | ST-11 20    | 106.00               | 3.00       | MgT-15 04   | 57.00                | 1.00       |
| SY 26/66              | 60.00                | 1.00       | MT-4 01     | 74.00                | 2.00       | MgT-15 05   | 57.00                | 1.00       |
| SY 26/66              | 61.00                | 1.00       | MT-4 02     | 76.00                | 2.00       | MgT-15 06   | 55.00                | 1.00       |
| SY 44/144             | 45.00                | 2.00       | MT-4 03     | 76.00                | 3.00       | MgT-15 07   | 56.00                | 1.00       |
| SY 44/144             | 46.00                | 2.00       | MT-4 04     | 76.00                | 2.00       | MgT-15 08   | 57.00                | 2.00       |
| SY 44/144             | 52.00                | 2.00       | MT-4 05     | 76.00                | 2.00       | MgT-15 09   | 55.00                | 2.00       |
| Ravikant et al., 2009 |                      |            | MT-4 06     | 74.00                | 1.00       | MgT-15 10   | 57.00                | 1.00       |
| ST-2 01               | 102.00               | 2.00       | MT-4 07     | 72.00                | 3.00       | MgT-15 11   | 57.00                | 1.00       |
| ST-2 02               | 101.00               | 2.00       | MT-4 08     | 71.00                | 1.00       | MgT-15 12   | 58.00                | 1.00       |
| ST-2 03               | 106.00               | 3.00       | MT-4 09     | 48.00                | 2.00       | MgT-15 13   | 56.00                | 1.00       |
| ST-2 04               | 109.00               | 2.00       | MT-4 10     | 74.00                | 1.00       | MgT-15 14   | 55.00                | 1.00       |
| ST-2 05               | 107.00               | 2.00       | MT-4 11     | 74.00                | 2.00       | MgT-15 15   | 55.00                | 2.00       |
| ST-2 07               | 96.00                | 2.00       | MT-4 12     | 72.00                | 1.00       | MgT-15 16   | 56.00                | 1.00       |
| ST-2 09               | 103.00               | 2.00       | MT-4 13     | 75.00                | 4.00       | MgT-15 17   | 53.00                | 2.00       |
| ST-2 10               | 99.00                | 2.00       | MT-4 14     | 70.00                | 1.00       | MgT-15 18   | 56.00                | 3.00       |
| ST-2 11               | 102.00               | 2.00       | MT-4 15     | 74.00                | 2.00       | MgT-15 19   | 54.00                | 1.00       |
| ST-2 12               | 108.00               | 2.00       | MT-4 16     | 72.00                | 1.00       | MgT-15 19r  | 18.20                | 0.40       |
| ST-2 13               | 105.00               | 2.00       | MT-4 17     | 71.00                | 2.00       | MgT-15 20   | 54.00                | 2.00       |
| ST-2 14               | 106.00               | 3.00       | MT-4 18     | 49.00                | 1.00       | N-8 01      | 38.70                | 0.60       |
| ST-2 15               | 103.00               | 2.00       | MT-4 19     | 51.00                | 1.00       | N-8 02      | 518.00               | 8.00       |
| ST-2 16               | 106.00               | 2.00       | MT-4 20     | 73.00                | 1.00       | N-8 03      | 16.60                | 0.20       |
| ST-2 17               | 105.00               | 2.00       | MT-4 21     | 74.00                | 2.00       | N-8 04      | 155.00               | 2.00       |
| ST-2 18               | 103.00               | 2.00       | MT-9 01     | 69.00                | 2.00       | N-8 05      | 61.00                | 1.00       |
| ST-2 19               | 99.00                | 2.00       | MT-9 02     | 69.00                | 2.00       | N-8 06      | 21.80                | 0.40       |
| ST-2 20               | 98.00                | 2.00       | MT-9 03     | 73.00                | 2.00       | N-8 07      | 56.00                | 1.00       |
| ST-5 01               | 105.00               | 2.00       | MT-9 04     | 73.00                | 2.00       | N-8 08      | 19.80                | 0.30       |
| ST-5 02               | 104.00               | 2.00       | MT-9 05     | 72.00                | 2.00       | N-8 09      | 47.00                | 1.00       |
| ST-5 03               | 103.00               | 2.00       | MT-9 06     | 72.00                | 2.00       | N-8 10      | 605.00               | 9.00       |
| ST-5 04               | 107.00               | 2.00       | MT-9 07     | 73.00                | 2.00       | N-8 11      | 622.00               | 10.00      |
| ST-5 05               | 105.00               | 2.00       | MT-9 08     | 71.00                | 2.00       | N-8 12      | 32.70                | 0.60       |
| ST-5 06               | 92.00                | 3.00       | MT-9 09     | 73.00                | 3.00       | N-8 13      | 19.30                | 0.30       |
| ST-5 07               | 103.00               | 2.00       | MT-9 10     | 78.00                | 2.00       | N-8 14      | 25.20                | 0.40       |
| ST-5 08               | 101.00               | 2.00       | MT-9 11     | 53.00                | 1.00       | N-8 15      | 617.00               | 9.00       |
| ST-5 09               | 100.00               | 2.00       | MT-9 12     | 71.00                | 2.00       | DT-7 01     | 60.00                | 2.00       |
| ST-5 10               | 102.00               | 2.00       | MT-9 13     | 69.00                | 2.00       | DT-7 02     | 63.00                | 1.00       |
| ST-5 11               | 645.00               | 14.00      | MT-9 14     | 71.00                | 2.00       | DT-7 03     | 60.00                | 1.00       |
| ST-5 12               | 104.00               | 2.00       | MT-9 15     | 76.00                | 2.00       | DT-7 04     | 17.20                | 0.40       |
| ST-5 13               | 105.00               | 3.00       | MT-9 16     | 78.00                | 2.00       | DT-7 05     | 781.00               | 16.00      |
| ST-5 14               | 104.00               | 3.00       | MT-9 17     | 66.00                | 2.00       | DT-7 06     | 187.00               | 4.00       |
| ST-5 15               | 103.00               | 3.00       | MT-9 18     | 75.00                | 2.00       | DT-7 07     | 18.70                | 0.40       |
| ST-5 16               | 106.00               | 2.00       | MT-9 19     | 71.00                | 2.00       | DT-7 08     | 515.00               | 10.00      |
| ST-5 17               | 100.00               | 2.00       | MT-9 20     | 73.00                | 2.00       | DT-7 09     | 32.50                | 0.70       |
| ST-5 18               | 101.00               | 2.00       | MgT-14 01   | 64.00                | 1.00       | DT-7 10     | 489.00               | 10.00      |
| ST-5 19               | 103.00               | 2.00       | MgT-14 02   | 66.00                | 1.00       | DT-7 11     | 18.00                | 0.40       |
| ST-5 20               | 100.00               | 2.00       | MgT-14 03   | 65.00                | 1.00       | DT-7 12     | 20.90                | 0.90       |
| ST-11 01              | 112.00               | 3.00       | MgT-14 04   | 63.00                | 1.00       | DT-7 13     | 18.00                | 0.40       |
| ST-11 02              | 123.00               | 3.00       | MgT-14 05   | 60.00                | 1.00       | DT-7 14     | 19.20                | 1.00       |
| ST-11 03              | 97.00                | 2.00       | MgT-14 06   | 64.00                | 1.00       | DT-7 15     | 18.00                | 0.40       |
| ST-11 04              | 97.00                | 2.00       | MgT-14 07   | 64.00                | 1.00       | DT-7 16     | 372.00               | 8.00       |
| ST-11 05              | 102.00               | 2.00       | MgT-14 08   | 64.00                | 1.00       | DT-7 17     | 18.50                | 0.40       |
| ST-11 06              | 103.00               | 2.00       | MgT-14 09   | 64.00                | 1.00       | DT-7 18     | 437.00               | 9.00       |
| ST-11 07              | 110.00               | 2.00       | MgT-14 10   | 60.00                | 1.00       | DT-7 19     | 643.00               | 13.00      |
| ST-11 08              | 101.00               | 2.00       | MgT-14 11   | 61.00                | 1.00       | DT-7 20     | 20.00                | 0.40       |

| Sample name                   | Zircon U-Pb Age (Ma) | Error (Ma) | Sample name                   | Zircon U-Pb Age (Ma) | Error (Ma) | Sample name | Zircon U-Pb Age (Ma) | Error (Ma) |
|-------------------------------|----------------------|------------|-------------------------------|----------------------|------------|-------------|----------------------|------------|
| DT-7 22                       | 17.60                | 0.40       | TNG148a-4                     | 8.30                 | 6.80       | LA28-3      | 19.50                | 1.00       |
| DT-7 23                       | 44.00                | 1.00       | TNG148a-5                     | 11.70                | 3.20       | LA28-4      | 19.90                | 1.00       |
| DT-7 24                       | 16.20                | 0.30       | TNG148a-6                     | 18.40                | 2.30       | LA28-5      | 18.60                | 0.50       |
| DT-7 26                       | 241.00               | 6.00       | TNG148a-7                     | 18.00                | 2.40       | LA28-6      | 19.80                | 0.30       |
| DT-7 27                       | 20.30                | 0.40       | TNG148a-8                     | 17.00                | 3.30       | LA58-1      | 17.80                | 0.20       |
| DT-7 28                       | 396.00               | 8.00       | TNG148a-9                     | 13.70                | 3.50       | LA58-2      | 16.10                | 0.30       |
| DT-7 29                       | 17.70                | 0.40       | TNG148a-10                    | 16.30                | 3.30       | LA58-3      | 18.60                | 0.20       |
| DT-7 30                       | 18.50                | 0.40       | TNG148a-11                    | 19.60                | 3.50       | LA58-4      | 14.30                | 0.70       |
| DT-20 01                      | 209.00               | 4.00       | TNG148a-12                    | 15.60                | 4.50       | LA58-5      | 18.10                | 0.20       |
| DT-20 02                      | 97.00                | 3.00       | TNG148a-13                    | 17.00                | 3.70       | LA58-6      | 16.50                | 0.20       |
| DT-20 03                      | 66.00                | 1.00       | TNG148a-14                    | 16.30                | 2.10       | LA58-7      | 16.70                | 0.20       |
| DT-20 04                      | 553.00               | 9.00       | TNG148a-15                    | 14.20                | 4.00       | LA12-001    | 21.20                | 0.60       |
| DT-20 05                      | 19.60                | 0.40       | TNG148b-24                    | 18.50                | 0.40       | LA12-002    | 21.40                | 0.70       |
| DT-20 06                      | 19.00                | 0.30       | TNG148b-29                    | 19.60                | 11.60      | LA12-003    | 24.70                | 0.70       |
| DT-20 07                      | 338.00               | 6.00       | TNG148b-47                    | 20.10                | 0.30       | LA12-005    | 21.50                | 0.50       |
| DT-20 08                      | 34.00                | 1.00       | <u>Leloup et al., 2011</u>    |                      |            | LA12-006    | 22.80                | 0.60       |
| DT-20 09                      | 188.00               | 8.00       | LA20-1                        | 17.70                | 0.70       | LA12-007    | 24.50                | 0.60       |
| DT-20 10                      | 23.00                | 2.00       | LA20-2                        | 19.20                | 0.30       | LA12-009    | 21.50                | 0.60       |
| DT-20 11                      | 42.50                | 0.90       | LA20-3                        | 18.70                | 0.30       | LA12-011    | 23.30                | 0.60       |
| DT-20 12                      | 59.00                | 2.00       | LA20-4                        | 18.30                | 0.30       | LA12-014    | 21.50                | 0.50       |
| DT-20 13                      | 346.00               | 8.00       | LA20-5                        | 18.60                | 0.20       | LA12-016    | 21.30                | 0.50       |
| DT-20 14                      | 21.50                | 0.70       | LA20-6                        | 18.90                | 0.30       | LA12-020    | 21.60                | 0.60       |
| DT-20 15                      | 18.60                | 0.50       | LA20-7                        | 19.00                | 0.50       | LA12-025    | 21.90                | 0.60       |
| DT-20 16                      | 111.00               | 2.00       | LA20-8                        | 18.60                | 0.30       | LA12-027    | 21.50                | 0.50       |
| DT-20 17                      | 174.00               | 6.00       | LA20-9                        | 17.70                | 0.30       | LA12-029    | 23.90                | 0.60       |
| DT-20 18                      | 369.00               | 6.00       | LA20-10                       | 18.40                | 0.30       | LA12-032    | 21.30                | 0.50       |
| <u>Reichardt et al., 2000</u> |                      |            | LA20-11                       | 18.80                | 0.30       | LA12-029    | 23.10                | 0.80       |
| TNG62a-1                      | 61.20                | 0.70       | LA20-12                       | 18.60                | 0.60       | LA12-021    | 22.80                | 0.60       |
| TNG62a-2                      | 73.10                | 0.90       | LA20-13                       | 19.20                | 0.60       | LA12-015    | 22.90                | 0.60       |
| TNG62a-3                      | 68.10                | 1.00       | LA20-14                       | 18.30                | 0.60       | LA12-028    | 22.40                | 0.60       |
| TNG62a-4                      | 71.60                | 0.90       | LA21b-1                       | 18.00                | 0.50       | LA13-001    | 14.00                | 0.30       |
| TNG62a-5                      | 71.30                | 1.10       | LA21b-2                       | 18.90                | 0.20       | LA13-003    | 14.00                | 0.40       |
| TNG62a-6                      | 68.30                | 1.20       | LA21b-3                       | 17.90                | 1.00       | LA13-010    | 14.10                | 0.40       |
| TNG62a-7                      | 70.30                | 1.00       | LA21b-4                       | 18.10                | 0.60       | LA13-009    | 14.10                | 0.40       |
| TNG62a-8                      | 72.60                | 1.10       | LA21b-5                       | 18.60                | 0.50       | LA13-001    | 14.20                | 0.30       |
| TNG62a-9                      | 72.20                | 1.00       | LA21b-6                       | 18.70                | 0.30       | LA14-001    | 29.90                | 0.80       |
| TNG62a-10                     | 74.50                | 1.30       | LA21b-7                       | 19.40                | 0.40       | LA14-002    | 14.20                | 0.40       |
| TNG62a-11                     | 70.50                | 1.10       | LA21b-8                       | 18.20                | 0.50       | LA14-003    | 14.30                | 0.40       |
| TNG62a-12                     | 71.10                | 1.00       | LA21b-9                       | 18.50                | 0.30       | LA14-004    | 14.20                | 0.40       |
| TNG62a-13                     | 69.90                | 0.90       | LA21b-10                      | 18.80                | 0.30       | LA14-006    | 14.80                | 0.40       |
| TNG62a-14                     | 71.70                | 1.00       | LA21b-11                      | 18.60                | 0.30       | LA14-007    | 65.00                | 1.60       |
| TNG62a-15                     | 70.10                | 0.90       | LA21b-12                      | 18.20                | 0.30       | LA14-009    | 14.90                | 0.40       |
| TNG62a-16                     | 71.00                | 1.20       | LA21b-13                      | 19.60                | 0.70       | LA14-012    | 14.50                | 0.40       |
| TNG62a-17                     | 72.60                | 0.90       | LA21b-14                      | 18.00                | 0.20       | LA14-013    | 15.00                | 0.40       |
| TNG131a-1                     | 67.30                | 0.70       | LA21b-15                      | 18.20                | 0.30       | LA14-015    | 14.70                | 0.40       |
| TNG131a-2                     | 70.60                | 0.90       | LA21b-16                      | 18.20                | 0.30       | LA14-016    | 14.90                | 0.40       |
| TNG131a-3                     | 72.10                | 0.90       | LA21b-17                      | 18.60                | 1.00       | LA17-001    | 14.60                | 0.30       |
| TNG131a-4                     | 69.00                | 1.20       | LA21b-18                      | 18.80                | 0.40       | LA17-002    | 14.40                | 0.30       |
| TNG131a-5                     | 72.70                | 0.90       | LA21b-19                      | 18.30                | 0.30       | LA17-003    | 14.60                | 0.30       |
| TNG131a-6                     | 73.70                | 0.80       | LA60-1                        | 18.80                | 0.20       | LA17-006    | 64.20                | 1.60       |
| TNG131a-7                     | 72.00                | 1.70       | LA60-2                        | 16.70                | 0.50       | LA17-007    | 14.60                | 0.40       |
| TNG131a-8                     | 69.60                | 0.90       | LA60-3                        | 15.80                | 0.50       | LA17-008    | 14.20                | 0.30       |
| TNG131a-9                     | 69.80                | 0.90       | LA60-4                        | 16.00                | 0.30       | LA17-009    | 14.80                | 0.40       |
| TNG131a-10                    | 69.80                | 1.00       | LA60-5                        | 17.40                | 0.30       | LA17-010    | 14.40                | 0.40       |
| TNG131a-11                    | 73.30                | 1.00       | LA60-6                        | 16.60                | 0.60       | LA17-011    | 24.40                | 0.60       |
| TNG131a-12                    | 70.50                | 1.00       | <u>Boutonnet et al., 2012</u> |                      |            | LA17-013    | 14.30                | 0.40       |
| TNG131a-13                    | 68.10                | 0.90       | LA25-1                        | 72.20                | 0.90       | LA18-001    | 17.80                | 0.50       |
| TNG131a-14                    | 71.60                | 0.90       | LA25-2                        | 73.50                | 3.00       | LA18-002    | 18.80                | 0.50       |
| TNG131a-15                    | 70.80                | 1.30       | LA25-3                        | 18.70                | 0.50       | LA18-004    | 14.00                | 0.40       |
| TNG131a-16                    | 73.30                | 0.80       | LA25-4                        | 43.10                | 1.00       | LA18-005    | 17.30                | 0.50       |
| TNG131a-17                    | 70.10                | 1.10       | LA25-5                        | 66.40                | 3.00       | LA29-001    | 68.80                | 1.70       |
| TNG148a-1                     | 16.40                | 3.70       | LA25-6                        | 71.10                | 1.00       | LA29-002    | 69.50                | 1.80       |
| TNG148a-2                     | 15.50                | 2.90       | LA28-1                        | 21.10                | 2.00       | LA29-003    | 71.70                | 1.80       |
| TNG148a-3                     | 18.60                | 3.70       | LA28-2                        | 18.50                | 0.70       | LA29-004    | 70.30                | 1.80       |

| Sample name                | Zircon U-Pb Age (Ma) | Error (Ma) | Sample name | Zircon U-Pb Age (Ma) | Error (Ma) | Sample name | Zircon U-Pb Age (Ma) | Error (Ma) |
|----------------------------|----------------------|------------|-------------|----------------------|------------|-------------|----------------------|------------|
| LA29-005                   | 69.80                | 1.80       | PT10A-25    | 14.00                | 0.30       | PT10-10C    | 18.20                | 3.40       |
| LA29-006                   | 71.20                | 1.80       | PT10A-26    | 15.60                | 0.40       | PT10-11C    | 16.80                | 1.80       |
| LA29-007                   | 71.90                | 1.90       | PT10A-27    | 17.30                | 0.20       | PT10-12C    | 18.20                | 2.60       |
| LA29-008                   | 71.80                | 2.10       | PT10A-28    | 19.00                | 0.20       | PT10-13C    | 15.90                | 1.80       |
| LA29-011                   | 70.40                | 1.80       | PT10A-29    | 11.90                | 0.30       | PT10-14C    | 17.70                | 1.30       |
| LA29-012                   | 73.30                | 1.90       | PT10B-1     | 15.00                | 0.10       | PT10-15C    | 17.40                | 1.00       |
| LA29-013                   | 71.00                | 1.80       | PT22A-1     | 18.70                | 0.10       | PT10-16C    | 17.90                | 2.10       |
| LA29-014                   | 71.20                | 1.80       | PT22A-2     | 66.40                | 0.20       | PT10-17C    | 17.20                | 0.90       |
| LA29-015                   | 71.70                | 1.80       | PT22A-3     | 56.10                | 0.60       | PT10-18C    | 17.60                | 1.10       |
| LA29-016                   | 70.60                | 1.80       | PT22A-4     | 56.20                | 0.20       | PT22-1C     | 60.70                | 3.10       |
| LA29-018                   | 70.70                | 1.80       | PT22A-5     | 35.60                | 0.20       | PT22-2C     | 41.30                | 4.10       |
| LA29-019                   | 71.10                | 1.80       | PT22A-6     | 50.00                | 0.30       | PT22-4C     | 57.10                | 2.80       |
| LA29-020                   | 72.80                | 2.10       | PT22A-7     | 39.70                | 0.30       | PT22-5C     | 59.80                | 2.20       |
| LA33-002                   | 17.50                | 0.40       | PT22A-8     | 18.60                | 0.20       | PT22-6C     | 65.20                | 2.70       |
| LA33-006                   | 15.60                | 0.40       | PT22A-9     | 19.20                | 0.20       | PT22-7C     | 60.90                | 0.50       |
| LA33-007                   | 15.80                | 0.40       | PT22A-10    | 20.30                | 0.20       | PT22-8C     | 53.00                | 5.90       |
| LA33-008                   | 15.70                | 0.40       | PT22A-11    | 19.40                | 0.20       | PT22-9C     | 38.20                | 2.60       |
| LA33-010                   | 16.50                | 0.40       | PT22A-12    | 62.50                | 0.30       | PT22-10C    | 61.70                | 1.30       |
| LA33-012                   | 15.70                | 0.40       | PT22A-13    | 21.10                | 0.10       | PT22-11C    | 60.30                | 0.50       |
| LA33-014                   | 16.90                | 0.40       | PT22A-14    | 19.70                | 0.20       | PT22-13C    | 58.20                | 1.20       |
| LA33-015                   | 17.30                | 0.50       | PT22A-15    | 21.10                | 0.30       | PT22-14C    | 56.30                | 0.60       |
| LA33-021                   | 17.10                | 0.40       | PT22A-16    | 22.20                | 0.50       | PT22-15C    | 46.20                | 7.10       |
| LA33-022                   | 16.60                | 0.40       | PT22A-17    | 65.90                | 0.40       | PT22-16C    | 58.00                | 4.30       |
| LA33-026                   | 15.60                | 0.40       | PT22A-18    | 20.00                | 0.20       | PT22-18C    | 55.70                | 3.80       |
| LA33-022                   | 15.70                | 0.40       | PT22A-19    | 69.20                | 0.30       | PT22-19C    | 58.70                | 3.10       |
| LA34-004                   | 14.90                | 0.40       | PT22A-20    | 18.40                | 0.20       | PT22-20C    | 61.80                | 6.40       |
| LA34-005                   | 19.10                | 0.50       | PT22A-21    | 20.20                | 0.10       | PT25-1C     | 32.80                | 4.10       |
| LA34-008                   | 18.50                | 0.50       | PT25-1      | 16.60                | 0.20       | PT25-2C     | 22.80                | 0.60       |
| LA34-011                   | 17.20                | 0.40       | PT25-2      | 17.70                | 0.20       | PT25-4C     | 56.50                | 4.70       |
| LA34-013                   | 17.40                | 0.40       | PT25-3      | 16.60                | 0.40       | PT25-5C     | 18.90                | 1.10       |
| LA34-017                   | 15.90                | 0.40       | PT25-4      | 19.30                | 0.30       | PT25-6C     | 88.90                | 8.90       |
| LA34-018                   | 18.00                | 0.50       | PT25-5      | 17.40                | 0.30       | PT25-7C     | 90.00                | 4.20       |
| LA34-003                   | 15.60                | 0.40       | PT25-6      | 17.40                | 0.30       | PT25-8C     | 45.10                | 3.00       |
| LA34-012                   | 14.30                | 0.40       | PT25-7      | 18.60                | 0.30       | PT25-10C    | 85.50                | 0.90       |
| LA48-002                   | 108.50               | 2.80       | PT25-8      | 19.50                | 0.40       | PT25-11C    | 21.20                | 0.90       |
| LA48-004                   | 91.20                | 2.40       | PT25-9      | 18.00                | 0.50       | PT25-13C    | 79.70                | 5.00       |
| LA48-006                   | 65.40                | 1.60       | PT25-10     | 19.30                | 0.30       | PT25-15C    | 88.00                | 6.20       |
| LA48-008                   | 93.60                | 2.40       | PT25-11     | 18.00                | 0.30       | PT25-16C    | 82.00                | 5.10       |
| LA48-007                   | 104.90               | 2.70       | PT25-12     | 16.80                | 0.20       | PT25-17C    | 18.20                | 0.60       |
| <u>Horton et al., 2013</u> |                      |            | PT25-13     | 18.80                | 0.30       | PT25-18C    | 18.60                | 0.60       |
| PT10A-1                    | 13.40                | 0.20       | PT25-14     | 18.20                | 0.40       | PT25-20C    | 18.30                | 1.50       |
| PT10A-2                    | 20.10                | 0.10       | PT30-1      | 164.50               | 2.50       | PT25-21C    | 89.10                | 3.60       |
| PT10A-3                    | 11.40                | 0.20       | PT30-2      | 156.90               | 2.60       | PT25-23C    | 18.60                | 1.00       |
| PT10A-4                    | 9.00                 | 0.20       | PT30-3      | 158.90               | 2.90       | PT25-24C    | 17.80                | 1.60       |
| PT10A-5                    | 20.70                | 0.10       | PT30-4      | 18.90                | 0.30       | PT25-25C    | 86.40                | 4.80       |
| PT10A-6                    | 14.90                | 0.30       | PT30-5      | 153.10               | 2.00       | PT30-2C     | 168.60               | 4.20       |
| PT10A-7                    | 18.40                | 0.20       | KF19-1      | 15.20                | 0.20       | PT30-3C     | 162.00               | 5.90       |
| PT10A-8                    | 13.90                | 0.10       | KF19-2      | 15.80                | 0.20       | PT30-4C     | 160.00               | 3.00       |
| PT10A-9                    | 19.10                | 0.10       | KF19-3      | 16.90                | 0.20       | PT30-5C     | 163.50               | 5.20       |
| PT10A-10                   | 14.40                | 0.10       | KF19-4      | 14.90                | 0.20       | PT30-6C     | 156.30               | 3.30       |
| PT10A-11                   | 17.30                | 0.20       | KF19-5      | 15.10                | 0.30       | PT30-7C     | 155.70               | 3.10       |
| PT10A-12                   | 14.10                | 0.30       | KF19-6      | 15.20                | 0.20       | PT30-8C     | 140.20               | 9.80       |
| PT10-13                    | 13.60                | 0.30       | KF19-7      | 15.20                | 0.20       | PT30-9C     | 148.40               | 3.20       |
| PT10A-14                   | 15.80                | 0.10       | KF19-8      | 15.20                | 0.20       | PT30-10C    | 672.30               | 8.40       |
| PT10A-15                   | 16.80                | 0.10       | KF19-9      | 15.30                | 0.20       | PT30-11C    | 160.50               | 6.10       |
| PT10A-16                   | 17.80                | 0.20       | KF19-10     | 15.20                | 0.30       | PT30-12C    | 163.10               | 5.10       |
| PT10A-17                   | 18.10                | 0.10       | PT10-1C     | 69.10                | 2.90       | PT30-13C    | 123.70               | 9.10       |
| PT10A-18                   | 15.90                | 0.20       | PT10-3C     | 17.80                | 1.60       | PT30-14C    | 495.80               | 22.00      |
| PT10A-19                   | 13.10                | 0.10       | PT10-4C     | 17.40                | 1.60       | PT30-15C    | 755.20               | 12.00      |
| PT10A-20                   | 17.90                | 0.30       | PT10-5C     | 18.40                | 3.50       | PT30-16C    | 519.80               | 8.50       |
| PT10A-21                   | 18.50                | 0.10       | PT10-6C     | 18.50                | 1.00       | PT30-17C    | 159.80               | 3.50       |
| PT10A-22                   | 16.20                | 0.10       | PT10-7C     | 17.10                | 2.50       | PT30-18C    | 806.20               | 13.40      |
| PT10A-23                   | 19.90                | 0.10       | PT10-8C     | 17.20                | 0.50       | PT30-19C    | 689.10               | 19.50      |
| PT10A-24                   | 14.50                | 0.10       | PT10-9C     | 17.60                | 0.90       | PT30-20C    | 126.70               | 13.90      |

| Sample name               | Zircon U-Pb Age (Ma) | Error (Ma) | Sample name | Zircon U-Pb Age (Ma) | Error (Ma) |
|---------------------------|----------------------|------------|-------------|----------------------|------------|
| PT30-21C                  | 137.60               | 15.10      | BD39-24     | 23.71                | 0.23       |
| PT30-22C                  | 158.60               | 1.40       | BD39-15     | 557.68               | 18.93      |
| PT30-23C                  | 162.00               | 3.60       | BD80-20     | 21.40                | 1.37       |
| PT30-24C                  | 154.40               | 2.50       | BD80-13     | 21.82                | 0.78       |
| KF19-1C                   | 17.40                | 1.30       | BD80-19     | 22.03                | 1.87       |
| KF19-3C                   | 21.50                | 0.80       | BD80-5      | 22.06                | 0.58       |
| KF19-4C                   | 25.70                | 0.40       | BD80-7      | 22.40                | 1.69       |
| KF19-5C                   | 19.50                | 0.40       | BD80-6      | 23.11                | 1.38       |
| KF19-6C                   | 17.20                | 1.60       | BD80-12     | 24.10                | 1.98       |
| KF19-8C                   | 40.30                | 10.00      | BD80-15     | 22.69                | 0.23       |
| KF19-9C                   | 14.00                | 3.60       | BD80-16     | 22.49                | 0.24       |
| KF19-10C                  | 25.40                | 0.40       | BD80-17     | 24.50                | 0.91       |
| <u>Mahar et al., 2014</u> |                      |            | BD80-11     | 71.98                | 2.39       |
| BD50-24                   | 17.29                | 1.72       | BD80-8      | 95.66                | 3.53       |
| BD50-2                    | 17.68                | 0.38       | BD80-9      | 96.03                | 1.85       |
| BD50-31a                  | 17.93                | 0.77       | BD80-2      | 97.50                | 2.89       |
| BD50-9                    | 18.20                | 0.39       | BD80-1      | 97.67                | 3.35       |
| BD50-27                   | 18.24                | 0.59       | BD80-3      | 98.63                | 1.89       |
| BD50-23                   | 18.45                | 0.69       | BD94-01     | 17.08                | 5.29       |
| BD50-6                    | 18.53                | 0.72       | BD94-02     | 18.25                | 0.87       |
| BD50-34                   | 18.94                | 0.67       | BD94-03     | 17.85                | 0.73       |
| BD50-33a                  | 18.46                | 0.33       | BD94-04     | 17.35                | 0.53       |
| BD50-4                    | 20.51                | 0.81       | BD94-05     | 17.40                | 0.29       |
| BD50-12                   | 21.09                | 1.73       | BD94-06     | 17.54                | 1.02       |
| BD50-10                   | 21.28                | 1.04       | BD94-08     | 17.59                | 1.38       |
| BD50-8                    | 21.55                | 0.90       | BD94-09     | 20.28                | 3.30       |
| BD50-3                    | 22.74                | 0.91       | BD94-10     | 17.72                | 0.56       |
| BD50-11                   | 24.41                | 1.26       | BD94-11     | 17.66                | 0.55       |
| BD50-25                   | 21.58                | 0.29       | BD94-12     | 17.97                | 0.36       |
| BD50-17                   | 21.75                | 0.32       | BD94-13     | 17.85                | 0.83       |
| BD50-35                   | 23.01                | 0.22       | BD94-16     | 16.97                | 3.20       |
| BD50-8a                   | 23.81                | 0.19       | BD94-21     | 18.29                | 0.61       |
| BD50-31b                  | 921.85               | 118.77     | BD94-22     | 17.61                | 0.78       |
| BD35-23                   | 23.85                | 3.68       | BD94-23     | 18.13                | 0.72       |
| BD35-24                   | 14.99                | 0.58       | BD94-24     | 22.11                | 4.10       |
| BD35-31                   | 21.33                | 1.11       | BD94-26     | 17.46                | 0.66       |
| BD35-4                    | 21.62                | 0.51       | BD94-27     | 17.14                | 1.27       |
| BD35-36                   | 21.64                | 1.94       | BD94-28     | 18.06                | 2.43       |
| BD35-25                   | 21.92                | 0.73       | BD94-29     | 16.71                | 0.94       |
| BD35-11                   | 22.06                | 0.67       | BD94-31     | 16.68                | 1.54       |
| BD35-37                   | 23.21                | 1.59       | BD94-34     | 18.93                | 1.20       |
| BD35-12                   | 22.62                | 0.33       | BD94-36     | 14.94                | 4.06       |
| BD35-13                   | 21.01                | 0.52       | BD94-39     | 17.73                | 0.10       |
| BD35-15                   | 22.66                | 0.71       | BD94-37     | 17.17                | 0.24       |
| BD35-16                   | 23.36                | 0.23       | BD94-43     | 17.78                | 0.21       |
| BD35-20                   | 21.50                | 0.12       | BD94-7      | 18.24                | 0.37       |
| BD35-22                   | 18.30                | 0.78       | BD94-42     | 19.54                | 0.48       |
| BD35-29                   | 22.10                | 0.30       | BD94-38     | 17.69                | 0.34       |
| BD35-40                   | 23.51                | 0.65       | BD94-40     | 18.27                | 0.68       |
| BD35-33                   | 76.20                | 3.36       | BD94-41     | 20.09                | 0.46       |
| BD39-29                   | 21.87                | 1.05       | BD94-25     | 77.67                | 4.48       |
| BD39-18                   | 22.10                | 1.91       |             |                      |            |
| BD39-28                   | 22.17                | 0.35       |             |                      |            |
| BD39-26                   | 22.41                | 0.66       |             |                      |            |
| BD39-22                   | 22.66                | 0.38       |             |                      |            |
| BD39-27                   | 22.87                | 1.20       |             |                      |            |
| BD39-33                   | 23.52                | 0.60       |             |                      |            |
| BD39-3                    | 22.49                | 0.08       |             |                      |            |
| BD39-36                   | 24.98                | 0.45       |             |                      |            |
| BD39-37                   | 25.41                | 0.17       |             |                      |            |
| BD39-13                   | 23.61                | 0.46       |             |                      |            |
| BD39-20                   | 24.08                | 0.41       |             |                      |            |
| BD39-21                   | 23.83                | 0.23       |             |                      |            |
| BD39-25                   | 26.34                | 1.24       |             |                      |            |

**Table DR9. Compiled Zircon U-Pb Ages of Tectonic Blocks (Kohistan-Ladakh)**

| Sample name                      | Zircon U-Pb Age (Ma) | Error (Ma) |
|----------------------------------|----------------------|------------|
| <u>Honegger et al. (1982)</u>    |                      |            |
| 1                                | 103.0                | 3.0        |
| <u>Scharer et al. (1984a)</u>    |                      |            |
| 1                                | 62.9                 | 0.4        |
| 2                                | 101.0                | 2.0        |
| <u>Zeilinger et al., 2001</u>    |                      |            |
| Ky-Pegmatite                     | 82.8                 | 1.1        |
| Noritic Gabbro                   | 85.7                 | 0.2        |
| Diorite                          | 91.8                 | 1.4        |
| Gabbro                           | 98.9                 | 0.4        |
| Granite                          | 97.1                 | 0.2        |
| <u>Krol et al., 1996</u>         |                      |            |
| 1.1                              | 29.9                 | 0.5        |
| 2.1                              | 30.5                 | 0.5        |
| 3.1                              | 29.5                 | 0.5        |
| 4.1                              | 30.4                 | 0.5        |
| 5.1                              | 29.5                 | 0.5        |
| 6.1                              | 30.4                 | 0.5        |
| 7.1                              | 46.6                 | 0.9        |
| 8.1                              | 31.5                 | 0.5        |
| 9.1                              | 27.2                 | 0.5        |
| <u>Weinberg and dunlap, 2000</u> |                      |            |
| 1                                | 48.8                 | 0.8        |
| 2                                | 48.8                 | 0.8        |
| 3                                | 48.8                 | 0.8        |
| 4                                | 48.8                 | 0.8        |
| 5                                | 47.5                 | 0.8        |
| 6                                | 47.5                 | 0.8        |
| 7                                | 51.3                 | 0.8        |
| 8                                | 51.3                 | 0.8        |
| 9                                | 51.3                 | 0.8        |
| 10                               | 51.3                 | 0.8        |
| 11                               | 52.5                 | 0.8        |
| 12                               | 52.5                 | 0.8        |
| 13                               | 43.8                 | 2.0        |
| 14                               | 51.3                 | 2.0        |
| 15                               | 53.8                 | 2.0        |
| 16                               | 56.3                 | 2.0        |
| 17                               | 56.3                 | 2.0        |
| 18                               | 56.3                 | 2.0        |
| 19                               | 56.3                 | 2.0        |
| 20                               | 58.8                 | 2.0        |
| 21                               | 58.8                 | 2.0        |
| 22                               | 58.8                 | 2.0        |
| 23                               | 58.8                 | 2.0        |
| 24                               | 58.8                 | 2.0        |
| 25                               | 61.3                 | 2.0        |
| 26                               | 61.3                 | 2.0        |
| 27                               | 61.3                 | 2.0        |
| 28                               | 61.3                 | 2.0        |
| 29                               | 63.8                 | 2.0        |
| 30                               | 63.8                 | 2.0        |
| 31                               | 63.8                 | 2.0        |
| 32                               | 63.8                 | 2.0        |
| 33                               | 63.8                 | 2.0        |
| 34                               | 63.8                 | 2.0        |
| 35                               | 63.8                 | 2.0        |
| 36                               | 66.3                 | 2.0        |
| 37                               | 66.3                 | 2.0        |
| 38                               | 66.3                 | 2.0        |

| Sample name                         | Zircon U-Pb Age (Ma) | Error (Ma) |
|-------------------------------------|----------------------|------------|
| 39                                  | 68.8                 | 2.0        |
| 40                                  | 68.8                 | 2.0        |
| 41                                  | 71.3                 | 2.0        |
| 42                                  | 73.8                 | 2.0        |
| 43                                  | 49.5                 | 1.0        |
| 44                                  | 50.5                 | 1.0        |
| 45                                  | 53.5                 | 1.0        |
| 46                                  | 57.5                 | 1.0        |
| 47                                  | 57.5                 | 1.0        |
| 48                                  | 57.5                 | 1.0        |
| 49                                  | 58.5                 | 1.0        |
| 50                                  | 58.5                 | 1.0        |
| 51                                  | 58.5                 | 1.0        |
| 52                                  | 58.5                 | 1.0        |
| 53                                  | 58.5                 | 1.0        |
| 54                                  | 59.5                 | 1.0        |
| 55                                  | 59.5                 | 1.0        |
| 56                                  | 59.5                 | 1.0        |
| 57                                  | 60.5                 | 1.0        |
| 58                                  | 60.5                 | 1.0        |
| 59                                  | 63.5                 | 1.0        |
| 60                                  | 70.5                 | 1.0        |
| <u>Schaltegger et al., 2002</u>     |                      |            |
| 1                                   | 99.3                 | 22.0       |
| 2                                   | 98.8                 | 5.0        |
| 3                                   | 98.9                 | 7.0        |
| 4                                   | 99.1                 | 5.0        |
| 5                                   | 97.1                 | 28.0       |
| 6                                   | 97.0                 | 16.0       |
| 7                                   | 97.3                 | 13.0       |
| 8                                   | 91.8                 | 15.0       |
| 9                                   | 91.3                 | 7.0        |
| 10                                  | 92.3                 | 13.0       |
| 11                                  | 83.5                 | 8.0        |
| 12                                  | 83.2                 | 12.0       |
| 13                                  | 81.5                 | 5.0        |
| 14                                  | 85.6                 | 5.0        |
| 15                                  | 85.7                 | 5.0        |
| 16                                  | 85.7                 | 5.0        |
| 17                                  | 85.8                 | 5.0        |
| <u>Dunlap and Wysoczanski, 2002</u> |                      |            |
| 1.1                                 | 67.7                 | 1.7        |
| 2.1                                 | 67.6                 | 2.2        |
| 3.1                                 | 68.9                 | 1.6        |
| 5.1                                 | 64.6                 | 3.1        |
| 6.1                                 | 72.6                 | 2.3        |
| 7.1                                 | 69.3                 | 1.3        |
| 8.1                                 | 65.1                 | 1.7        |
| 9.1                                 | 65.1                 | 2.3        |
| 10.1                                | 63.3                 | 2.2        |
| 11.1                                | 68.7                 | 2.1        |
| 12.1                                | 62.4                 | 2.5        |
| 13.1                                | 67.2                 | 2.8        |
| 1.1                                 | 61.0                 | 2.4        |
| 2.1                                 | 59.4                 | 2.4        |
| 3.1                                 | 59.3                 | 2.8        |
| 4.1                                 | 66.6                 | 1.6        |
| 5.1                                 | 61.3                 | 2.1        |
| 6.1                                 | 49.1                 | 3.6        |
| 7.1                                 | 61.1                 | 1.5        |
| 8.1                                 | 61.7                 | 1.5        |
| 9.1                                 | 59.5                 | 2.4        |
| 10.1                                | 61.0                 | 2.0        |
| 11.1                                | 60.2                 | 2.1        |

| Sample name                   | Zircon U-Pb Age (Ma) | Error (Ma) |
|-------------------------------|----------------------|------------|
| 12.1                          | 58.2                 | 2.2        |
| 13.1                          | 60.0                 | 1.6        |
| 14.1                          | 64.9                 | 2.1        |
| <u>Singh et al., 2007</u>     |                      |            |
| 1                             | 59.0                 | 1.0        |
| 2                             | 55.0                 | 1.0        |
| 3                             | 61.0                 | 1.0        |
| 4                             | 62.0                 | 1.0        |
| 5                             | 60.0                 | 1.0        |
| 6                             | 62.0                 | 1.0        |
| 7                             | 59.0                 | 1.0        |
| 8                             | 60.0                 | 1.0        |
| 10                            | 61.0                 | 1.0        |
| 11                            | 76.0                 | 4.0        |
| 12                            | 60.0                 | 1.0        |
| 13                            | 95.0                 | 2.0        |
| 14                            | 60.0                 | 1.0        |
| 15                            | 61.0                 | 1.0        |
| 16                            | 60.0                 | 2.0        |
| 17                            | 62.0                 | 1.0        |
| 18                            | 57.0                 | 1.0        |
| 19                            | 58.0                 | 1.0        |
| 20                            | 63.0                 | 1.0        |
| 21                            | 59.0                 | 2.0        |
| 22                            | 59.0                 | 2.0        |
| 23                            | 58.0                 | 2.0        |
| 24                            | 59.0                 | 1.0        |
| 25                            | 59.0                 | 1.0        |
| 26                            | 58.0                 | 1.0        |
| 1                             | 54.0                 | 1.0        |
| 2                             | 58.0                 | 1.0        |
| 3                             | 58.0                 | 1.0        |
| 4                             | 57.0                 | 1.0        |
| 5                             | 58.0                 | 1.0        |
| 6                             | 58.0                 | 1.0        |
| 7                             | 59.0                 | 1.0        |
| 8                             | 60.0                 | 1.0        |
| <u>Heuberger et al., 2007</u> |                      |            |
| 21                            | 111.8                | 0.5        |
| 22                            | 111.4                | 0.3        |
| 23                            | 112.2                | 0.4        |
| 24                            | 111.2                | 0.4        |
| 25                            | 110.8                | 0.4        |
| 26                            | 44.2                 | 0.9        |
| 27                            | 45.4                 | 0.8        |
| 28                            | 49.8                 | 0.6        |
| 29                            | 45.9                 | 0.9        |
| 30                            | 48.2                 | 0.9        |
| 31                            | 192.0                | 0.9        |
| 32                            | 198.1                | 0.9        |
| 33                            | 125.2                | 0.9        |
| 34                            | 168.8                | 0.9        |
| 35                            | 163.6                | 0.8        |
| 36                            | 60.3                 | 0.8        |
| 37                            | 49.7                 | 0.7        |
| 38                            | 38.6                 | 0.3        |
| 39                            | 40.0                 | 0.7        |
| 40                            | 38.7                 | 0.3        |
| 41                            | 39.0                 | 0.5        |
| 42                            | 49.0                 | 0.5        |
| <u>Upadhyay et al., 2008</u>  |                      |            |
| RG16-1                        | 57.6                 | 1.4        |
| RG16-2                        | 57.7                 | 1.4        |
| RG16-3                        | 58.9                 | 1.4        |

| Sample name                  | Zircon U-Pb Age (Ma) | Error (Ma) | Sample name | Zircon U-Pb Age (Ma) | Error (Ma) | Sample name                 | Zircon U-Pb Age (Ma) | Error (Ma) |
|------------------------------|----------------------|------------|-------------|----------------------|------------|-----------------------------|----------------------|------------|
| RG16-4                       | 58.4                 | 1.4        | 1-G 14      | 52.0                 | 1.0        | I-6 18                      | 50.6                 | 0.8        |
| RG16-5                       | 56.3                 | 1.4        | 1-G 15      | 52.0                 | 1.0        | I-6 19                      | 50.1                 | 1.0        |
| RG13-1                       | 57.3                 | 0.5        | 1-G 16      | 51.0                 | 1.0        | I-6 20                      | 50.1                 | 0.8        |
| RG13-2                       | 48.9                 | 0.5        | 1-G 17      | 53.0                 | 1.0        | O-5 01                      | 65.0                 | 2.0        |
| RG13-3                       | 52.3                 | 0.5        | 1-G 18      | 52.0                 | 1.0        | O-5 02                      | 61.0                 | 2.0        |
| RG13-4                       | 53.1                 | 0.5        | 1-G 19      | 52.0                 | 1.0        | O-5 03                      | 64.0                 | 1.0        |
| RG13-5                       | 52.3                 | 0.5        | 1-G 20      | 53.0                 | 1.0        | O-5 04                      | 62.0                 | 2.0        |
| RG14-1                       | 51.7                 | 1.8        | HI-7 01     | 77.0                 | 2.0        | O-5 05                      | 63.0                 | 1.0        |
| RG14-2                       | 54.9                 | 1.8        | HI-7 02     | 74.0                 | 2.0        | O-5 06                      | 64.0                 | 1.0        |
| RG14-3                       | 51.9                 | 1.8        | HI-7 03     | 70.0                 | 2.0        | O-5 07                      | 62.0                 | 1.0        |
| RG14-4                       | 51.5                 | 1.8        | HI-7 04     | 70.0                 | 2.0        | O-5 08                      | 62.0                 | 2.0        |
| RG14-5                       | 54.1                 | 1.8        | HI-7 05     | 67.0                 | 2.0        | O-5 09                      | 64.0                 | 1.0        |
| RG20-1                       | 45.6                 | 0.6        | HI-7 06     | 69.0                 | 2.0        | O-5 10                      | 65.0                 | 2.0        |
| RG20-2                       | 46.7                 | 0.6        | HI-7 07     | 66.0                 | 2.0        | O-5 11                      | 64.0                 | 2.0        |
| RG20-3                       | 45.4                 | 0.6        | HI-7 08     | 65.0                 | 1.0        | O-5 12                      | 66.0                 | 2.0        |
| RG20-4                       | 44.8                 | 0.6        | HI-7 09     | 66.0                 | 1.0        | O-5 13                      | 59.0                 | 2.0        |
| RG20-5                       | 45.1                 | 0.6        | HI-7 10     | 71.0                 | 2.0        | O-5 14                      | 65.0                 | 1.0        |
| RG6-2                        | 67.2                 | 2.1        | HI-7 11     | 66.0                 | 1.0        | O-5 15                      | 65.0                 | 4.0        |
| RG6-3                        | 65.9                 | 2.1        | HI-7 12     | 71.0                 | 2.0        | O-5 16                      | 66.0                 | 1.0        |
| RG6-4                        | 67.4                 | 2.1        | HI-7 13     | 67.0                 | 2.0        | O-5 17                      | 65.0                 | 1.0        |
| <u>Khan et al., 2009</u>     |                      |            | HI-7 14     | 67.0                 | 1.0        | O-5 18                      | 64.0                 | 2.0        |
| Sample1-1                    | 65.1                 | 1.0        | HI-7 15     | 69.0                 | 2.0        | O-5 19                      | 65.0                 | 3.0        |
| Sample1-2                    | 64.6                 | 1.0        | HI-7 16     | 73.0                 | 2.0        | O-5 20                      | 65.0                 | 1.0        |
| Sample1-3                    | 1255.0               | 1.0        | HI-7 17     | 68.0                 | 2.0        | <u>Jagoutz et al., 2009</u> |                      |            |
| Sample1-4                    | 64.9                 | 1.0        | HI-7 18     | 67.0                 | 3.0        | BO-02-13-1                  | 62.5                 | 2.9        |
| Sample2-1                    | 65.1                 | 1.0        | HI-7 19     | 73.0                 | 2.0        | BO-02-13-2                  | 65.0                 | 3.0        |
| Sample2-2                    | 62.3                 | 1.0        | HI-7 20     | 72.0                 | 2.0        | BO-02-13-3                  | 65.6                 | 1.5        |
| Sample2-3                    | 62.8                 | 1.0        | H-7 01      | 52.0                 | 2.0        | BO-02-13-4                  | 59.8                 | 1.4        |
| Sample2-4                    | 61.5                 | 1.0        | H-7 02      | 51.8                 | 0.9        | BO-02-13-5                  | 60.4                 | 1.4        |
| Sample8-1                    | 61.8                 | 1.0        | H-7 03      | 51.9                 | 1.0        | BO-02-13-6                  | 62.2                 | 1.4        |
| Sample8-2                    | 41.1                 | 1.0        | H-7 04      | 51.6                 | 1.0        | BO-02-13-7                  | 59.7                 | 1.5        |
| Sample8-3                    | 41.2                 | 1.0        | H-7 05      | 50.9                 | 1.0        | BO-02-13-8                  | 65.8                 | 1.6        |
| Sample8-4                    | 39.9                 | 1.0        | H-7 06      | 51.5                 | 1.0        | BO-02-13-9                  | 59.7                 | 1.5        |
| Sample8-5                    | 46.4                 | 1.0        | H-7 07      | 49.0                 | 2.0        | BO-02-13-10                 | 65.4                 | 1.6        |
| Sample8-6                    | 46.6                 | 1.0        | H-7 08      | 51.0                 | 1.0        | BO-02-13-11                 | 61.6                 | 1.6        |
| Sample8-7                    | 58.1                 | 1.0        | H-7 09      | 50.0                 | 2.0        | BO-02-13-12                 | 59.2                 | 1.3        |
| Sample8-8                    | 156.0                | 1.0        | H-7 10      | 51.0                 | 1.0        | BO-02-13-13                 | 64.6                 | 1.4        |
| Sample8-9                    | 204.0                | 1.0        | H-7 11      | 50.8                 | 0.9        | BO-02-13-14                 | 59.1                 | 1.3        |
| Sample8-10                   | 271.0                | 1.0        | H-7 12      | 50.9                 | 0.9        | BO-02-13-15                 | 61.9                 | 1.4        |
| Sample8-11                   | 441.0                | 1.0        | H-7 13      | 50.0                 | 1.0        | BO-02-13-16                 | 64.6                 | 1.4        |
| Sample8-12                   | 403.0                | 1.0        | H-7 14      | 50.0                 | 2.0        | BO-02-13-17                 | 65.3                 | 2.3        |
| Sample9-1                    | 65.5                 | 1.0        | H-7 15      | 51.0                 | 1.0        | BO-02-13-18                 | 60.7                 | 1.5        |
| Sample9-2                    | 65.0                 | 1.0        | H-7 16      | 50.1                 | 1.0        | BO-02-13-19                 | 62.8                 | 1.6        |
| Sample9-3                    | 64.4                 | 1.0        | H-7 17      | 51.0                 | 1.0        | BO-02-13-20                 | 59.5                 | 1.5        |
| Sample9-4                    | 64.8                 | 1.0        | H-7 18      | 51.5                 | 0.8        | BO-02-13-21                 | 59.1                 | 0.9        |
| Sample9-5                    | 64.8                 | 1.0        | H-7 19      | 50.8                 | 0.9        | BO-02-13-22                 | 62.5                 | 1.4        |
| Sample20-1                   | 64.6                 | 1.0        | H-7 20      | 51.0                 | 1.0        | BO-02-13-23                 | 58.9                 | 1.3        |
| Sample20-2                   | 64.4                 | 1.0        | I-6 01      | 50.7                 | 0.8        | BO-02-13-24                 | 64.8                 | 1.4        |
| Sample20-3                   | 65.0                 | 1.0        | I-6 02      | 50.7                 | 0.8        | BO-02-13-25                 | 62.7                 | 1.2        |
| Sample20-4                   | 64.8                 | 1.0        | I-6 03      | 50.6                 | 0.8        | BO-02-13-26                 | 64.9                 | 1.3        |
| <u>Ravikant et al., 2009</u> |                      |            | I-6 04      | 50.9                 | 0.8        | BO-02-13-27                 | 59.8                 | 1.2        |
| 1-G 01                       | 48.0                 | 1.0        | I-6 05      | 50.0                 | 2.0        | RB-02-16-1                  | 54.0                 | 1.8        |
| 1-G 02                       | 49.0                 | 1.0        | I-6 06      | 50.3                 | 0.8        | RB-02-16-2                  | 54.4                 | 1.8        |
| 1-G 03                       | 48.0                 | 1.0        | I-6 07      | 50.0                 | 1.0        | RB-02-16-3                  | 60.1                 | 2.0        |
| 1-G 04                       | 46.0                 | 1.0        | I-6 08      | 51.0                 | 1.0        | RB-02-16-4                  | 59.2                 | 2.0        |
| 1-G 05                       | 56.0                 | 1.0        | I-6 09      | 50.5                 | 0.9        | RB-02-16-5                  | 54.9                 | 1.8        |
| 1-G 06                       | 43.0                 | 1.0        | I-6 10      | 50.0                 | 1.0        | RB-02-16-6                  | 58.6                 | 2.0        |
| 1-G 07                       | 50.0                 | 1.0        | I-6 11      | 50.7                 | 0.9        | RB-02-16-7                  | 56.9                 | 2.1        |
| 1-G 08                       | 51.0                 | 1.0        | I-6 12      | 51.0                 | 2.0        | RB-02-16-8                  | 57.9                 | 2.1        |
| 1-G 09                       | 51.0                 | 1.0        | I-6 13      | 50.7                 | 0.8        | RB-02-16-9                  | 55.1                 | 2.0        |
| 1-G 10                       | 52.0                 | 1.0        | I-6 14      | 49.8                 | 0.8        | RB-02-16-10                 | 53.3                 | 2.0        |
| 1-G 11                       | 48.0                 | 1.0        | I-6 15      | 49.0                 | 1.0        | RB-02-16-11                 | 56.6                 | 2.1        |
| 1-G 12                       | 51.0                 | 1.0        | I-6 16      | 50.9                 | 0.7        | RB-02-16-12                 | 58.1                 | 2.1        |
| 1-G 13                       | 52.0                 | 1.0        | I-6 17      | 50.0                 | 1.0        | RB-02-16-13                 | 53.5                 | 1.8        |

| Sample name | Zircon U-Pb Age (Ma) | Error (Ma) |
|-------------|----------------------|------------|
| RB-02-16-14 | 60.0                 | 2.0        |
| RB-02-16-15 | 53.3                 | 1.8        |
| RB-02-16-16 | 60.7                 | 1.0        |
| RB-02-16-17 | 56.0                 | 0.9        |
| RB-02-16-18 | 57.3                 | 1.0        |
| RB-02-16-19 | 58.2                 | 1.0        |
| RB-02-16-20 | 54.6                 | 0.9        |
| RB-02-16-21 | 54.1                 | 1.2        |
| RB-02-16-22 | 56.8                 | 1.3        |
| RB-02-16-23 | 56.5                 | 1.9        |
| RB-02-16-24 | 60.9                 | 3.2        |
| RB-02-16-25 | 57.7                 | 3.1        |
| RB-02-16-26 | 57.8                 | 3.1        |
| RB-02-16-27 | 55.5                 | 3.0        |
| RB-02-16-28 | 56.2                 | 3.0        |
| RB-02-16-29 | 57.8                 | 3.1        |
| RB-02-16-30 | 57.4                 | 3.1        |
| RB-02-16-31 | 57.3                 | 2.3        |
| RB-02-16-32 | 62.5                 | 2.5        |
| RB-02-16-33 | 54.9                 | 2.2        |
| RB-02-16-34 | 55.6                 | 2.2        |
| RB-02-16-35 | 53.4                 | 2.1        |
| RB-02-16-36 | 60.3                 | 2.4        |
| RB-02-16-37 | 56.8                 | 2.3        |
| RB-02-16-38 | 62.5                 | 2.5        |
| RB-02-16-39 | 62.5                 | 2.5        |
| RB-02-16-40 | 61.2                 | 2.5        |
| DR-02-18-1  | 39.9                 | 3.6        |
| DR-02-18-2  | 40.3                 | 3.6        |
| DR-02-18-3  | 41.4                 | 3.7        |
| DR-02-18-4  | 38.2                 | 3.4        |
| DR-02-18-5  | 42.0                 | 3.7        |
| DR-02-18-6  | 41.7                 | 2.8        |
| DR-02-18-7  | 41.6                 | 2.8        |
| DR-02-18-8  | 42.2                 | 2.8        |
| DR-02-18-9  | 41.2                 | 2.8        |
| DR-02-18-10 | 39.0                 | 2.6        |
| DR-02-18-11 | 47.5                 | 1.4        |
| DR-02-18-12 | 42.4                 | 1.6        |
| DR-02-18-13 | 44.7                 | 1.7        |
| DR-02-18-14 | 42.4                 | 1.6        |
| DR-02-18-15 | 42.1                 | 1.6        |
| DR-02-18-16 | 42.0                 | 1.6        |
| DR-02-18-17 | 42.1                 | 1.6        |
| DR-02-18-18 | 38.4                 | 1.8        |
| DR-02-18-19 | 39.9                 | 0.5        |
| DR-02-18-20 | 39.3                 | 0.5        |
| DR-02-18-21 | 40.4                 | 1.8        |
| DR-02-18-22 | 45.3                 | 2.0        |
| DR-02-18-23 | 42.0                 | 1.9        |
| DR-02-18-24 | 43.2                 | 1.9        |
| DR-02-18-25 | 43.7                 | 3.8        |
| DR-02-18-26 | 42.6                 | 1.6        |
| DR-02-18-27 | 41.5                 | 1.5        |
| DR-02-18-28 | 43.9                 | 1.6        |
| DR-02-18-29 | 42.2                 | 1.6        |
| DR-02-18-30 | 43.4                 | 1.6        |
| DR-02-18-31 | 42.4                 | 2.4        |
| DR-02-18-32 | 41.6                 | 2.4        |
| DR-02-18-33 | 43.0                 | 2.5        |
| DR-02-18-34 | 43.7                 | 1.3        |
| DR-02-18-35 | 43.9                 | 1.3        |
| DR-02-18-36 | 44.3                 | 1.4        |
| DR-02-18-37 | 43.9                 | 3.3        |

| Sample name | Zircon U-Pb Age (Ma) | Error (Ma) |
|-------------|----------------------|------------|
| DR-02-18-38 | 43.8                 | 3.3        |
| DR-02-18-39 | 40.8                 | 3.0        |
| DR-02-18-40 | 39.7                 | 3.0        |
| DR-02-18-41 | 41.5                 | 3.1        |
| DR-02-18-42 | 40.9                 | 3.1        |
| DR-02-18-43 | 44.6                 | 0.7        |
| DR-02-18-44 | 44.9                 | 0.7        |
| DR-02-18-45 | 41.8                 | 0.6        |
| DR-02-18-46 | 42.5                 | 0.7        |
| DR-02-18-47 | 42.9                 | 0.7        |
| DR-02-18-48 | 42.5                 | 1.2        |
| DR-02-18-49 | 41.9                 | 1.2        |
| DR-02-18-50 | 44.0                 | 1.3        |
| DR-02-18-51 | 44.0                 | 0.6        |
| DR-02-18-52 | 42.6                 | 1.2        |
| DR-02-18-53 | 41.3                 | 1.1        |
| DR-02-18-54 | 45.0                 | 1.2        |
| DR-02-18-55 | 41.3                 | 1.1        |
| DR-02-18-56 | 46.5                 | 1.0        |
| DR-02-18-57 | 43.3                 | 0.9        |
| DR-02-18-58 | 43.6                 | 0.9        |
| DR-02-18-59 | 42.7                 | 0.9        |
| DR-02-18-60 | 43.0                 | 0.9        |
| MN-02-04-1  | 70.2                 | 3.0        |
| MN-02-04-2  | 71.1                 | 3.1        |
| MN-02-04-3  | 70.2                 | 2.2        |
| MN-02-04-4  | 73.3                 | 2.3        |
| MN-02-04-5  | 74.6                 | 2.3        |
| MN-02-04-6  | 74.1                 | 2.3        |
| MN-02-04-7  | 73.8                 | 1.6        |
| MN-02-04-8  | 71.7                 | 1.2        |
| MN-02-04-9  | 75.9                 | 1.3        |
| MN-02-04-10 | 72.3                 | 1.2        |
| MN-02-04-11 | 73.5                 | 1.2        |
| MN-02-04-12 | 70.4                 | 2.0        |
| MN-02-04-13 | 69.0                 | 2.0        |
| MN-02-04-14 | 74.1                 | 2.1        |
| MN-02-04-15 | 70.2                 | 2.0        |
| MN-02-04-16 | 75.0                 | 1.6        |
| MN-02-04-17 | 70.2                 | 1.5        |
| MN-02-04-18 | 77.2                 | 1.7        |
| MN-02-04-19 | 75.1                 | 1.6        |
| MN-02-04-20 | 68.1                 | 1.5        |
| MN-02-04-21 | 76.1                 | 1.6        |
| MN-02-04-22 | 74.1                 | 1.2        |
| MN-02-04-23 | 71.4                 | 1.1        |
| MN-02-04-24 | 71.6                 | 1.1        |
| MN-02-04-25 | 72.3                 | 1.2        |
| MN-02-04-26 | 72.5                 | 1.2        |
| MN-02-04-27 | 70.0                 | 1.1        |
| MN-02-04-28 | 69.5                 | 1.1        |
| MN-02-04-29 | 72.0                 | 1.2        |
| MN-02-04-30 | 68.2                 | 1.1        |
| MN-02-04-31 | 68.2                 | 1.1        |
| MN-02-04-32 | 70.2                 | 1.2        |
| MN-02-04-33 | 69.9                 | 1.2        |
| MN-02-04-34 | 69.0                 | 1.2        |
| MN-02-04-35 | 70.9                 | 1.2        |
| MN-02-04-36 | 71.6                 | 1.0        |
| MN-02-04-37 | 73.0                 | 1.1        |
| MN-02-04-38 | 76.2                 | 1.1        |
| MN-02-04-39 | 75.1                 | 1.1        |
| MN-02-04-40 | 72.9                 | 1.1        |
| MN-02-04-41 | 78.0                 | 1.3        |

| Sample name | Zircon U-Pb Age (Ma) | Error (Ma) |
|-------------|----------------------|------------|
| MN-02-04-42 | 70.7                 | 1.2        |
| MN-02-04-43 | 72.1                 | 1.2        |
| MN-02-04-44 | 70.6                 | 1.2        |
| MN-02-04-45 | 72.7                 | 1.2        |
| MN-02-04-46 | 77.0                 | 1.3        |
| MN-02-04-47 | 69.6                 | 1.2        |
| MN-02-04-48 | 68.3                 | 1.2        |
| MN-02-04-49 | 72.6                 | 1.4        |
| MN-02-04-50 | 71.8                 | 1.4        |
| MN-02-04-51 | 70.3                 | 1.4        |
| MN-02-04-52 | 76.2                 | 1.5        |
| MN-02-04-53 | 73.3                 | 1.4        |
| MN-02-04-54 | 77.8                 | 1.5        |
| MN-02-04-55 | 74.2                 | 2.1        |
| MN-02-04-56 | 71.5                 | 2.0        |
| MN-02-04-57 | 71.5                 | 2.0        |
| MN-02-04-58 | 72.7                 | 2.9        |
| MN-02-04-59 | 71.3                 | 2.9        |
| MR-02-03-1  | 68.8                 | 1.8        |
| MR-02-03-2  | 74.6                 | 1.9        |
| MR-02-03-3  | 73.9                 | 1.9        |
| MR-02-03-4  | 70.4                 | 1.8        |
| MR-02-03-5  | 70.4                 | 1.8        |
| MR-02-03-6  | 67.0                 | 1.7        |
| MR-02-03-7  | 73.3                 | 0.9        |
| MR-02-03-8  | 68.0                 | 0.8        |
| MR-02-03-9  | 67.9                 | 0.8        |
| MR-02-03-10 | 68.4                 | 0.8        |
| MR-02-03-11 | 74.3                 | 1.6        |
| MR-02-03-12 | 69.6                 | 1.5        |
| MR-02-03-13 | 69.4                 | 1.5        |
| MR-02-03-14 | 66.2                 | 1.4        |
| MR-02-03-15 | 72.5                 | 1.6        |
| MR-02-03-16 | 70.1                 | 1.5        |
| MR-02-03-17 | 69.5                 | 1.5        |
| MR-02-03-18 | 70.6                 | 1.5        |
| C-01-77-1   | 73.9                 | 2.1        |
| C-01-77-2   | 63.7                 | 1.4        |
| C-01-77-3   | 64.9                 | 1.4        |
| C-01-77-4   | 61.9                 | 1.4        |
| C-01-77-5   | 64.6                 | 3.6        |
| C-01-77-6   | 66.8                 | 1.4        |
| C-01-77-7   | 63.4                 | 2.3        |
| C-01-77-8   | 66.7                 | 1.4        |
| C-01-77-9   | 67.5                 | 1.4        |
| C-01-77-10  | 67.6                 | 1.4        |
| C-01-77-11  | 66.0                 | 2.5        |
| C-01-77-12  | 68.2                 | 1.5        |
| C-01-77-13  | 68.6                 | 2.6        |
| C-01-77-14  | 68.3                 | 1.5        |
| C-01-77-15  | 65.2                 | 1.5        |
| C-01-77-16  | 68.8                 | 1.5        |
| C-01-77-17  | 70.9                 | 2.7        |
| C-01-77-18  | 68.5                 | 1.5        |
| C-01-77-19  | 68.9                 | 1.5        |
| C-01-77-20  | 66.4                 | 1.5        |
| C-01-77-21  | 70.3                 | 1.5        |
| C-01-77-22  | 70.3                 | 1.5        |
| C-01-77-23  | 67.1                 | 1.5        |
| C-01-77-24  | 71.1                 | 1.5        |
| C-01-77-25  | 62.5                 | 1.6        |
| C-01-77-26  | 70.4                 | 1.6        |
| C-01-77-27  | 72.1                 | 1.6        |
| C-01-77-28  | 72.5                 | 1.6        |



| Sample name                  | Zircon U-Pb Age (Ma) | Error (Ma) | Sample name               | Zircon U-Pb Age (Ma) | Error (Ma) | Sample name   | Zircon U-Pb Age (Ma) | Error (Ma) |
|------------------------------|----------------------|------------|---------------------------|----------------------|------------|---------------|----------------------|------------|
| C-01-77-29                   | 66.2                 | 1.6        | G13-2                     | 102.2                | 0.6        | LAD06-26-27.1 | 75.3                 | 1.1        |
| C-01-77-30                   | 68.2                 | 1.7        | G13-3                     | 100.7                | 0.8        | LAD06-26-28.1 | 47.5                 | 2.1        |
| C-01-77-31                   | 68.4                 | 1.7        | G13-4                     | 98.8                 | 0.9        | LAD06-26-29.1 | 74.1                 | 3.1        |
| C-01-77-32                   | 68.8                 | 1.7        | G13-5                     | 103.0                | 0.4        | LAD06-26-30.1 | 53.2                 | 2.8        |
| C-01-77-33                   | 70.8                 | 1.8        | G13-6                     | 103.8                | 0.4        | LAD06-26-31.1 | 55.2                 | 1.1        |
| C-01-77-34                   | 64.4                 | 1.8        | P63-1                     | 99.8                 | 0.3        | LAD06-26-32.1 | 12.3                 | 2.4        |
| C-01-77-35                   | 63.8                 | 1.8        | P63-2                     | 98.9                 | 0.5        | LAD06-26-33.1 | 16.4                 | 0.4        |
| C-01-77-36                   | 64.0                 | 1.8        | P63-3                     | 100.2                | 0.3        | LAD06-26-34.1 | 59.8                 | 1.5        |
| C-01-77-37                   | 64.1                 | 1.8        | P63-4                     | 98.9                 | 0.4        | LAD06-26-35.1 | 15.8                 | 0.8        |
| C-01-77-38                   | 65.8                 | 1.8        | P63-5                     | 103.2                | 0.4        | LAD06-26-36.1 | 58.0                 | 1.2        |
| C-01-77-39                   | 64.7                 | 1.8        | D101-1                    | 106.9                | 0.3        | LAD06-26-37.1 | 44.9                 | 6.1        |
| C-01-77-40                   | 68.6                 | 1.9        | D101-2                    | 107.2                | 0.6        | LAD06-26-38.1 | 53.0                 | 2.6        |
| C-01-77-41                   | 67.3                 | 2.0        | D101-3                    | 106.6                | 0.4        | LAD06-26-39.1 | 56.5                 | 0.8        |
| C-01-77-42                   | 71.0                 | 2.0        | D101-4                    | 105.2                | 0.5        | LAD06-26-40.1 | 58.1                 | 0.8        |
| C-01-77-43                   | 68.0                 | 2.0        | D101-5                    | 103.0                | 2.0        | LAD06-26-41.1 | 16.2                 | 0.9        |
| C-01-77-44                   | 71.3                 | 2.0        | D101-6                    | 103.9                | 0.6        | LAD06-26-42.1 | 53.2                 | 1.3        |
| C-01-77-45                   | 69.9                 | 2.0        | G12-1                     | 104.8                | 1.1        | LAD06-26-44.1 | 49.4                 | 2.6        |
| C-01-77-46                   | 62.3                 | 2.3        | G12-2                     | 103.6                | 1.1        | LAD08-12-1.1  | 60.1                 | 1.0        |
| C-01-77-47                   | 65.6                 | 2.4        | G12-3                     | 105.5                | 2.3        | LAD08-12-2.1  | 58.8                 | 1.0        |
| C-01-77-48                   | 70.8                 | 2.7        | P8-1                      | 105.2                | 0.3        | LAD08-12-3.1  | 62.1                 | 1.1        |
| C-01-77-49                   | 63.8                 | 2.4        | P8-2                      | 104.8                | 0.1        | LAD08-12-4.1  | 62.3                 | 1.0        |
| C-01-77-50                   | 64.4                 | 2.4        | KO8-18-1                  | 95.0                 | 0.1        | LAD08-12-5.1  | 63.4                 | 1.1        |
| C-01-77-51                   | 65.9                 | 2.5        | KO8-18-2                  | 93.6                 | 0.1        | LAD08-12-5.2  | 107.1                | 6.4        |
| C-01-77-52                   | 67.9                 | 2.6        | KO8-18-3                  | 93.6                 | 0.1        | LAD08-12-6.1  | 64.8                 | 1.1        |
| C-01-77-53                   | 67.9                 | 2.6        | KO8-18-4                  | 94.6                 | 0.1        | LAD08-12-7.1  | 50.2                 | 2.7        |
| C-01-77-54                   | 69.4                 | 2.6        | KO8-18-5                  | 95.0                 | 0.1        | LAD08-12-8.1  | 67.4                 | 1.1        |
| C-01-77-55                   | 70.3                 | 2.7        | <u>White et al., 2011</u> |                      |            | LAD08-12-9.1  | 64.4                 | 2.7        |
| C-01-77-56                   | 73.7                 | 2.8        | LAD06-23-1.2              | 55.3                 | 1.5        | LAD08-12-10.1 | 67.1                 | 1.1        |
| C-01-77-57                   | 71.4                 | 2.7        | LAD06-23-3.3              | 58.3                 | 1.1        | LAD08-12-11.1 | 64.5                 | 1.1        |
| C-01-77-58                   | 66.8                 | 3.7        | LAD06-23-4.2              | 67.6                 | 1.3        | LAD08-12-12.1 | 63.3                 | 1.0        |
| C-01-77-59                   | 69.4                 | 3.9        | LAD06-23-5.2              | 63.0                 | 1.4        | LAD08-12-13.1 | 63.9                 | 1.0        |
| C-01-77-60                   | 66.5                 | 2.4        | LAD06-23-7.2              | 56.8                 | 1.3        | LAD08-12-14.2 | 73.6                 | 8.8        |
| BR-02-19-1                   | 76.0                 | 5.0        | LAD06-23-8.2              | 64.2                 | 1.9        | LAD08-12-14.3 | 59.7                 | 0.9        |
| BR-02-19-2                   | 71.4                 | 4.7        | LAD06-23-9.3              | 60.2                 | 1.1        | LAD08-12-15.1 | 67.0                 | 1.3        |
| BR-02-19-3                   | 75.4                 | 4.6        | LAD06-23-10.2             | 56.5                 | 1.3        | LAD08-12-16.1 | 67.1                 | 1.1        |
| BR-02-19-4                   | 77.0                 | 4.7        | LAD06-23-13.3             | 95.7                 | 2.5        | LAD08-12-17.1 | 65.2                 | 1.1        |
| BR-02-19-5                   | 71.5                 | 4.7        | LAD06-23-18.2             | 60.5                 | 1.2        | LAD08-12-18.1 | 81.0                 | 3.2        |
| BR-02-19-6                   | 75.6                 | 4.6        | LAD06-23-19.2             | 55.2                 | 1.7        | LAD08-12-19.1 | 65.4                 | 3.3        |
| BR-02-19-7                   | 74.7                 | 5.1        | LAD06-26-1.2              | 17.0                 | 1.0        | LAD08-12-11.2 | 371.3                | 35.9       |
| BR-02-19-8                   | 77.1                 | 5.3        | LAD06-26-2.2              | 43.1                 | 0.6        | LAD08-12-20.1 | 61.4                 | 1.0        |
| BR-02-19-9                   | 75.6                 | 5.2        | LAD06-26-3.3              | 16.1                 | 0.2        | LAD08-12-20.2 | 66.4                 | 1.1        |
| BR-02-19-10                  | 71.8                 | 1.2        | LAD06-26-4.2              | 13.0                 | 0.4        | LAD08-12-21.1 | 80.6                 | 1.6        |
| BR-02-19-11                  | 77.9                 | 5.4        | LAD06-26-5.1              | 53.4                 | 7.7        | LAD08-12-21.2 | 60.8                 | 1.0        |
| BR-02-19-12                  | 76.7                 | 1.3        | LAD06-26-6.1              | 55.8                 | 2.1        | LAD08-12-22.1 | 65.6                 | 1.1        |
| BR-02-19-13                  | 78.8                 | 5.4        | LAD06-26-7.1              | 55.5                 | 1.4        | LAD08-12-22.2 | 68.2                 | 6.5        |
| BR-02-19-14                  | 74.6                 | 5.1        | LAD06-26-8.1              | 38.5                 | 4.2        | LAD08-12-23.1 | 64.4                 | 1.1        |
| BR-02-19-15                  | 75.6                 | 4.6        | LAD06-26-9.1              | 57.9                 | 3.5        | LAD08-12-24.1 | 67.1                 | 2.2        |
| BR-02-19-16                  | 76.6                 | 4.7        | LAD06-26-10.1             | 58.9                 | 0.8        | LAD08-12-24.2 | 66.1                 | 2.1        |
| BR-02-19-17                  | 77.7                 | 4.8        | LAD06-26-11.1             | 54.2                 | 6.4        | LAD08-12-25.1 | 63.7                 | 1.0        |
| BR-02-19-18                  | 72.8                 | 4.8        | LAD06-26-12.2             | 49.8                 | 7.3        | LAD08-12-26.1 | 64.5                 | 1.9        |
| BR-02-19-19                  | 72.9                 | 3.8        | LAD06-26-13.1             | 55.2                 | 3.3        | LAD08-12-27.1 | 65.8                 | 1.2        |
| BR-02-19-20                  | 72.4                 | 4.8        | LAD06-26-14.1             | 59.4                 | 1.0        | LAD08-12-28.1 | 69.7                 | 4.7        |
| <u>St-Onge et al., 2010</u>  |                      |            | LAD06-26-15.1             | 56.1                 | 1.2        | LAD08-12-29.1 | 67.4                 | 1.1        |
| L08-C2-1                     | 57.6                 | 0.1        | LAD06-26-16.1             | 79.1                 | 1.1        | LAD08-12-30.1 | 64.2                 | 1.0        |
| L08-C2-2                     | 57.8                 | 0.1        | LAD06-26-17.1             | 55.3                 | 2.7        | LAD08-12-31.1 | 73.0                 | 2.6        |
| L08-C2-3                     | 57.6                 | 0.1        | LAD06-26-18.2             | 866.1                | 66.1       | LAD08-12-32.1 | 63.9                 | 1.4        |
| L08-C2-4                     | 56.9                 | 0.1        | LAD06-26-19.1             | 65.6                 | 2.4        | LAD08-12-33.1 | 64.6                 | 1.1        |
| L08-C2-5                     | 57.7                 | 0.2        | LAD06-26-20.1             | 57.2                 | 0.9        | LAD08-12-34.1 | 67.2                 | 1.3        |
| L08-C1-1                     | 46.6                 | 0.2        | LAD06-26-21.1             | 13.8                 | 1.8        | LAD08-12-35.1 | 70.2                 | 3.2        |
| L08-C1-2                     | 47.0                 | 0.3        | LAD06-26-22.1             | 55.7                 | 1.1        | LAD08-12-36.1 | 68.9                 | 1.1        |
| L08-C1-3                     | 47.0                 | 0.1        | LAD06-26-23.1             | 53.2                 | 2.2        | LAD08-12-37.1 | 69.3                 | 1.2        |
| L08-C1-4                     | 47.8                 | 0.1        | LAD06-26-24.1             | 14.7                 | 0.7        | LAD08-12-38.1 | 67.3                 | 1.2        |
| <u>Bouilhol et al., 2011</u> |                      |            | LAD06-26-25.1             | 58.8                 | 3.0        | LAD08-12-38.2 | 62.7                 | 1.0        |
| G13-1                        | 98.9                 | 1.0        | LAD06-26-26.1             | 54.3                 | 0.8        | LAD08-12-39.1 | 62.9                 | 4.3        |

| Sample name   | Zircon U-Pb Age (Ma) | Error (Ma) | Sample name   | Zircon U-Pb Age (Ma) | Error (Ma) | Sample name             | Zircon U-Pb Age (Ma) | Error (Ma) |
|---------------|----------------------|------------|---------------|----------------------|------------|-------------------------|----------------------|------------|
| LAD08-12-39.2 | 58.3                 | 0.9        | LAD08-16-24.1 | 46.9                 | 1.0        | HIM06-31.1              | 69.1                 | 1.6        |
| LAD08-12-40.1 | 67.5                 | 1.1        | LAD08-16-25.1 | 48.8                 | 0.5        | HIM06-32.1              | 45.0                 | 1.4        |
| LAD08-12-41.1 | 67.4                 | 1.3        | LAD08-16-26.1 | 59.9                 | 4.1        | HIM06-33.1              | 50.8                 | 0.5        |
| LAD08-12-41.2 | 65.3                 | 1.1        | LAD08-16-27.1 | 54.6                 | 4.9        | HIM07-1.1               | 54.8                 | 1.5        |
| LAD08-12-42.1 | 64.6                 | 1.0        | LAD08-16-28.1 | 59.3                 | 2.3        | HIM07-2.1               | 54.8                 | 0.9        |
| LAD08-15-1.1  | 57.9                 | 1.2        | LAD08-16-29.1 | 48.9                 | 0.6        | HIM07-3.1               | 55.3                 | 2.7        |
| LAD08-15-2.1  | 48.7                 | 1.7        | LAD08-16-30.1 | 97.7                 | 1.3        | HIM07-4.1               | 53.3                 | 1.7        |
| LAD08-15-3.1  | 53.9                 | 2.8        | LAD08-17-1.1  | 51.7                 | 0.6        | HIM09-1.1               | 49.3                 | 1.3        |
| LAD08-15--4.1 | 55.0                 | 2.1        | LAD08-17-2.1  | 55.3                 | 0.8        | HIM09-2.1               | 57.5                 | 0.6        |
| LAD08-15-5.1  | 56.5                 | 2.4        | LAD08-17-3.1  | 50.2                 | 1.3        | HIM09-3.1               | 57.0                 | 0.6        |
| LAD08-15-6.4  | 52.9                 | 2.3        | LAD08-17-4.1  | 56.6                 | 0.7        | HIM09-4.1               | 59.1                 | 0.7        |
| LAD08-15-7.1  | 58.8                 | 3.0        | LAD08-17-5.1  | 52.1                 | 1.0        | HIM09-5.1               | 57.2                 | 0.9        |
| LAD08-15-8.1  | 55.8                 | 4.5        | LAD08-17-6.1  | 51.1                 | 1.9        | HIM09-6.1               | 59.7                 | 0.6        |
| LAD08-15-9.1  | 43.7                 | 5.4        | LAD08-17-7.1  | 74.0                 | 4.2        | HIM09-7.1               | 56.7                 | 0.6        |
| LAD08-15-10.1 | 56.3                 | 3.3        | LAD08-17-8.1  | 49.6                 | 1.4        | HIM09-8.1               | 61.3                 | 0.7        |
| LAD08-15-11.1 | 51.3                 | 4.7        | LAD08-17-9.1  | 52.1                 | 0.7        | HIM09-9.1               | 56.3                 | 3.2        |
| LAD08-15-12.1 | 67.8                 | 3.4        | LAD08-17-10.1 | 55.5                 | 0.6        | HIM09-10.1              | 58.8                 | 1.3        |
| LAD08-15-13.1 | 65.2                 | 1.7        | LAD08-17-11.1 | 53.0                 | 0.8        | HIM09-11.1              | 54.0                 | 1.5        |
| LAD08-15-14.1 | 61.3                 | 1.8        | LAD08-17-12.1 | 50.8                 | 0.6        | HIM09-12.1              | 57.5                 | 2.1        |
| LAD08-15-15.1 | 59.0                 | 1.2        | LAD08-17-13.1 | 60.1                 | 0.7        | HIM09-14.1              | 62.6                 | 1.2        |
| LAD08-15-16.1 | 60.7                 | 3.1        | LAD08-17-14.1 | 56.6                 | 1.0        | HIM09-15.1              | 57.9                 | 0.6        |
| LAD08-15-17.1 | 59.5                 | 2.2        | LAD08-17-15.1 | 64.8                 | 0.7        | HIM09-16.1              | 59.2                 | 0.8        |
| LAD08-15-18.1 | 60.7                 | 1.4        | LAD08-17-16.1 | 50.6                 | 1.1        | HIM09-17.1              | 52.0                 | 1.4        |
| LAD08-15-19.1 | 53.0                 | 4.5        | LAD08-17-17.1 | 52.3                 | 1.8        | HIM09-18.1              | 56.5                 | 2.5        |
| LAD08-15-20.1 | 53.6                 | 1.9        | LAD08-17-18.1 | 53.1                 | 0.8        | HIM09-19.2              | 52.5                 | 2.3        |
| LAD08-15-21.1 | 59.6                 | 4.4        | LAD08-17-19.1 | 55.7                 | 1.1        | HIM09-20.2              | 54.3                 | 0.6        |
| LAD08-15-22.1 | 54.0                 | 6.2        | LAD08-17-20.1 | 52.0                 | 0.9        | HIM09-21.1              | 58.0                 | 0.9        |
| LAD08-15-23.1 | 57.9                 | 3.2        | LAD08-17-21.1 | 50.2                 | 0.9        | HIM09-22.1              | 53.4                 | 2.3        |
| LAD08-15-24.1 | 59.8                 | 2.4        | LAD08-17-22.1 | 47.0                 | 0.6        | HIM09-23.1              | 62.9                 | 0.7        |
| LAD08-15-25.1 | 56.3                 | 4.0        | LAD08-17-23.1 | 69.3                 | 2.1        | HIM09-24.1              | 58.6                 | 0.6        |
| LAD08-15-26.1 | 57.6                 | 1.1        | LAD08-17-24.1 | 56.2                 | 2.3        | HIM09-25.1              | 58.6                 | 0.7        |
| LAD08-15-27.1 | 48.5                 | 1.1        | LAD08-17-25.1 | 54.9                 | 0.8        | HIM09-26.1              | 59.6                 | 2.2        |
| LAD08-15-28.1 | 59.4                 | 8.5        | LAD08-17-26.1 | 49.8                 | 0.5        | HIM09-27.1              | 56.5                 | 2.4        |
| LAD08-15-29.1 | 60.9                 | 1.9        | LAD08-17-27.1 | 61.8                 | 0.8        | HIM09-28.1              | 58.6                 | 1.5        |
| LAD08-15-30.1 | 59.3                 | 1.3        | HIM06-1.1     | 51.5                 | 4.3        | HIM09-29.1              | 52.9                 | 1.9        |
| LAD08-15-31.1 | 60.0                 | 3.9        | HIM06-2.1     | 55.7                 | 3.8        | HIM09-30.1              | 62.1                 | 1.4        |
| LAD08-15-32.1 | 42.9                 | 3.4        | HIM06-3.1     | 61.2                 | 0.6        | HIM09-31.1              | 61.5                 | 0.7        |
| LAD08-15-33.1 | 54.3                 | 11.4       | HIM06-4.1     | 58.5                 | 0.8        | HIM09-32.1              | 57.3                 | 1.4        |
| LAD08-15-34.1 | 58.2                 | 7.4        | HIM06-5.1     | 55.7                 | 0.7        | HIM09-33.1              | 55.1                 | 1.6        |
| LAD08-15-35.1 | 54.4                 | 3.1        | HIM06-6.1     | 60.0                 | 0.7        | HIM09-34.1              | 62.0                 | 4.2        |
| LAD08-15-36.1 | 56.2                 | 5.3        | HIM06-7.1     | 52.4                 | 0.5        | HIM09-35.1              | 52.5                 | 2.6        |
| LAD08-16-1.1  | 54.7                 | 3.7        | HIM06-8.1     | 57.4                 | 0.6        | HIM09-36.1              | 58.6                 | 0.7        |
| LAD08-16-2.2  | 54.8                 | 1.2        | HIM06-9.1     | 52.4                 | 1.8        | HIM09-37.1              | 57.9                 | 0.6        |
| LAD08-16-3.1  | 56.0                 | 1.1        | HIM06-10.1    | 53.2                 | 1.7        | HIM09-38.1              | 58.4                 | 1.9        |
| LAD08-16-4.1  | 57.3                 | 0.7        | HIM06-11.1    | 57.4                 | 0.8        | HIM09-39.1              | 57.4                 | 3.5        |
| LAD08-16-5.1  | 47.1                 | 1.0        | HIM06-12.1    | 57.7                 | 0.6        | HIM09-40.1              | 53.7                 | 1.6        |
| LAD08-16-6.1  | 55.3                 | 1.4        | HIM06-13.1    | 58.3                 | 1.3        | HIM09-41.1              | 49.9                 | 4.6        |
| LAD08-16-7.1  | 54.8                 | 2.3        | HIM06-14.1    | 50.2                 | 19.4       | HIM09-42.2              | 56.3                 | 3.2        |
| LAD08-16-8.1  | 47.2                 | 1.5        | HIM06-15.1    | 52.8                 | 0.7        | HIM09-43.2              | 46.9                 | 1.4        |
| LAD08-16-9.1  | 47.1                 | 0.6        | HIM06-16.1    | 47.3                 | 5.2        | HIM09-44.2              | 46.6                 | 0.7        |
| LAD08-16-10.1 | 46.8                 | 0.6        | HIM06-17.1    | 52.7                 | 2.0        | HIM09-45.2              | 61.1                 | 1.0        |
| LAD08-16-11.1 | 46.9                 | 0.6        | HIM06-18.1    | 60.3                 | 3.8        | HIM09-46.2              | 65.8                 | 0.7        |
| LAD08-16-12.1 | 49.4                 | 0.7        | HIM06-19.1    | 53.0                 | 0.6        | HIM09-47.2              | 48.7                 | 0.6        |
| LAD08-16-13.2 | 55.2                 | 3.6        | HIM06-20.1    | 47.7                 | 0.6        | <u>Sen et al., 2013</u> |                      |            |
| LAD08-16-14.1 | 61.4                 | 0.8        | HIM06-21.1    | 57.0                 | 1.8        | HLN 26/1-1              | 73.8                 | 2.3        |
| LAD08-16-15.1 | 64.8                 | 1.3        | HIM06-22.1    | 43.6                 | 1.9        | HLN 26/1-2              | 65.1                 | 1.5        |
| LAD08-16-16.1 | 52.9                 | 1.3        | HIM06-23.1    | 53.7                 | 7.7        | HLN 26/1-3              | 73.4                 | 2.1        |
| LAD08-16-17.1 | 57.3                 | 3.7        | HIM06-24.1    | 55.9                 | 0.7        | HLN 26/1-4              | 69.0                 | 1.9        |
| LAD08-16-18.1 | 58.4                 | 1.0        | HIM06-25.1    | 53.5                 | 1.5        | HLN 26/1-5              | 68.4                 | 1.6        |
| LAD08-16-19.1 | 60.2                 | 2.9        | HIM06-26.2    | 49.0                 | 0.5        | HLN 26/1-6              | 70.9                 | 1.4        |
| LAD08-16-20.1 | 46.2                 | 1.4        | HIM06-27.2    | 55.3                 | 0.9        | HLN 26/1-7              | 68.1                 | 2.4        |
| LAD08-16-21.1 | 58.9                 | 1.4        | HIM06-28.2    | 68.1                 | 0.7        | HLN 26/1-8              | 70.6                 | 2.0        |
| LAD08-16-22.1 | 57.3                 | 1.2        | HIM06-29.1    | 72.0                 | 3.7        | HLN 26/1-9              | 88.1                 | 3.5        |
| LAD08-16-23.1 | 47.0                 | 1.5        | HIM06-30.1    | 53.4                 | 0.6        | HLN 26/1-10             | 81.9                 | 1.8        |

| Sample name | Zircon U-Pb Age (Ma) | Error (Ma) | Sample name                  | Zircon U-Pb Age (Ma) | Error (Ma) | Sample name  | Zircon U-Pb Age (Ma) | Error (Ma) |
|-------------|----------------------|------------|------------------------------|----------------------|------------|--------------|----------------------|------------|
| HLN 26/1-11 | 68.4                 | 1.7        | LUS 2/3-24                   | 47.3                 | 0.8        | LB08-12-7    | 55.0                 | 5.3        |
| HLN 26/1-12 | 72.6                 | 2.0        | LUS 2/3-25                   | 39.4                 | 0.8        | LB08-12-8    | 57.0                 | 3.1        |
| HLN 26/1-13 | 70.0                 | 2.1        | LUS 2/3-26                   | 51.8                 | 0.6        | LB08-12-9    | 59.0                 | 4.6        |
| HLN 26/1-14 | 73.3                 | 1.4        | LUS 2/3-27                   | 40.7                 | 0.6        | LB08-12-10   | 57.0                 | 8.3        |
| HLN 26/1-15 | 70.0                 | 1.8        | LUS 2/3-28                   | 257.0                | 4.5        | LB08-12-11   | 52.0                 | 7.1        |
| HLN 26/1-16 | 67.8                 | 1.7        | LUS 2/3-29                   | 42.8                 | 0.6        | LB08-12-12   | 58.0                 | 2.6        |
| HLN 26/1-17 | 78.4                 | 1.5        | LUS 2/3-30                   | 30.7                 | 0.6        | LB08-12-13   | 58.0                 | 6.6        |
| HLN 26/1-18 | 68.9                 | 2.0        | LUS 2/3-31                   | 40.7                 | 0.7        | LB08-12-14   | 60.0                 | 6.5        |
| HLN 26/1-19 | 79.0                 | 1.8        | LUS 2/3-32                   | 38.5                 | 1.0        | LB08-12-15   | 61.0                 | 5.6        |
| HLN 26/1-20 | 74.1                 | 1.3        | LUS 2/3-33                   | 43.5                 | 0.7        | LB08-12-16   | 62.0                 | 4.0        |
| HLN 26/1-21 | 71.5                 | 2.2        | LUS 2/3-34                   | 31.4                 | 0.8        | LB08-12-17   | 57.0                 | 3.1        |
| HLN 26/1-22 | 68.8                 | 2.2        | LUS 2/3-35                   | 191.6                | 0.6        | LB08-12-18   | 57.0                 | 4.8        |
| HLN 26/1-23 | 76.3                 | 1.5        | LUS 2/3-36                   | 59.2                 | 0.6        | LB08-23-1    | 47.0                 | 3.9        |
| HLN 26/1-24 | 75.6                 | 1.7        | LUS 2/3-37                   | 45.4                 | 0.6        | LB08-23-2    | 45.0                 | 3.1        |
| HLN 26/1-25 | 70.2                 | 1.9        | LUS 2/3-38                   | 95.4                 | 0.5        | LB08-23-3    | 47.0                 | 3.8        |
| HLN 26/1-26 | 74.4                 | 2.4        | LUS 2/3-39                   | 356.0                | 1.1        | LB08-23-4    | 45.0                 | 3.1        |
| HLN 26/1-27 | 74.5                 | 2.3        | <u>Bouilhol et al., 2013</u> |                      |            | LB08-23-5    | 47.0                 | 7.9        |
| HLN 26/1-28 | 68.9                 | 2.0        | KO8-3-1                      | 74.0                 | 9.5        | LB08-23-6    | 46.0                 | 4.4        |
| HLN 26/1-29 | 77.3                 | 1.7        | KO8-3-2                      | 76.0                 | 7.6        | LB08-23-7    | 49.0                 | 5.8        |
| HLN 26/1-30 | 67.8                 | 1.6        | KO8-3-3                      | 78.0                 | 5.1        | LB08-23-8    | 49.0                 | 7.5        |
| HLN 26/1-31 | 75.6                 | 1.3        | KO8-3-4                      | 76.0                 | 7.8        | LB08-23-9    | 49.0                 | 7.5        |
| HLN 26/1-32 | 71.3                 | 2.0        | KO8-3-5                      | 71.0                 | 17.0       | LB08-23-10   | 49.0                 | 7.3        |
| HLN 26/1-33 | 350.7                | 27.3       | KO8-3-6                      | 70.0                 | 6.5        | LB08-23-11   | 48.0                 | 4.1        |
| HLN 26/1-34 | 76.6                 | 1.9        | KO8-3-7                      | 75.0                 | 10.9       | LB08-23-12   | 47.0                 | 4.0        |
| HLN 26/1-35 | 69.9                 | 2.1        | KO8-3-8                      | 77.0                 | 4.7        | LB08-23-13   | 50.0                 | 3.2        |
| HLN 26/1-36 | 78.3                 | 1.9        | KO8-3-9                      | 64.0                 | 9.5        | LB08-23-14   | 51.0                 | 2.9        |
| HLN 26/1-37 | 70.1                 | 1.8        | KO8-3-10                     | 80.0                 | 10.9       | LB08-23-15   | 50.0                 | 3.6        |
| HLN 26/1-38 | 76.1                 | 3.8        | KO8-3-11                     | 79.0                 | 7.6        | LB08-23-16   | 52.0                 | 11.8       |
| HLN 26/1-39 | 1077.5               | 38.7       | KO8-3-12                     | 81.0                 | 8.6        | LB08-25-1    | 57.0                 | 5.8        |
| HLN 26/1-40 | 70.6                 | 1.7        | KO8-3-13                     | 74.0                 | 9.6        | LB08-25-2    | 45.0                 | 20.5       |
| HLN 26/1-41 | 71.1                 | 1.7        | KO8-3-14                     | 81.0                 | 8.4        | LB08-25-3    | 56.0                 | 7.6        |
| HLN 26/1-42 | 73.8                 | 2.1        | KO8-13-1                     | 50.0                 | 7.2        | LB08-25-4    | 48.0                 | 7.4        |
| HLN 26/1-43 | 73.7                 | 2.8        | KO8-13-2                     | 50.0                 | 4.7        | LB08-25-5    | 46.0                 | 7.5        |
| HLN 26/1-44 | 73.4                 | 1.8        | KO8-13-3                     | 49.0                 | 6.8        | LB08-25-6    | 43.0                 | 8.6        |
| HLN 26/1-45 | 72.2                 | 2.0        | KO8-13-4                     | 45.0                 | 9.3        | LB08-25-7    | 51.0                 | 15.2       |
| HLN 26/1-46 | 72.4                 | 2.1        | KO8-13-5                     | 51.0                 | 6.0        | LB08-25-8    | 49.0                 | 4.1        |
| HLN 26/1-47 | 477.7                | 9.0        | KO8-13-6                     | 48.0                 | 5.7        | LB08-25-9    | 49.0                 | 5.5        |
| HLN 26/1-48 | 70.6                 | 1.7        | KO8-13-7                     | 47.0                 | 4.1        | LB08-25-10   | 49.0                 | 4.8        |
| HLN 26/1-49 | 71.4                 | 1.9        | KO8-13-8                     | 53.0                 | 6.2        | LB08-25-11   | 52.0                 | 9.1        |
| HLN 26/1-50 | 78.2                 | 2.0        | KO8-13-9                     | 51.0                 | 9.9        | LB08-25-12   | 51.0                 | 5.5        |
| HLN 26/1-51 | 71.2                 | 2.0        | KO8-13-10                    | 53.0                 | 4.0        | LB08-25-13   | 50.0                 | 5.2        |
| LUS 2/3-1   | 35.1                 | 0.7        | KO8-13-11                    | 50.0                 | 5.8        | LB08-25-14   | 55.0                 | 6.5        |
| LUS 2/3-2   | 35.5                 | 0.9        | KO8-13-12                    | 55.0                 | 4.4        | LB09-5.2B-1  | 60.0                 | 6.9        |
| LUS 2/3-3   | 36.9                 | 1.4        | KO8-13-13                    | 47.0                 | 8.2        | LB09-5.2B-2  | 61.0                 | 2.4        |
| LUS 2/3-4   | 33.4                 | 0.6        | LB08-7-1                     | 55.0                 | 8.4        | LB09-5.2B-3  | 62.0                 | 4.7        |
| LUS 2/3-5   | 40.0                 | 0.7        | LB08-7-2                     | 61.0                 | 6.0        | LB09-5.2B-4  | 64.0                 | 18.0       |
| LUS 2/3-6   | 47.5                 | 1.3        | LB08-7-3                     | 56.0                 | 9.4        | LB09-5.2B-5  | 65.0                 | 4.9        |
| LUS 2/3-7   | 45.9                 | 1.2        | LB08-7-4                     | 63.0                 | 11.9       | LB09-5.2B-6  | 62.0                 | 4.3        |
| LUS 2/3-8   | 35.1                 | 0.6        | LB08-7-5                     | 62.0                 | 11.5       | LB09-5.2B-7  | 63.0                 | 4.0        |
| LUS 2/3-9   | 39.5                 | 0.8        | LB08-7-6                     | 53.0                 | 6.6        | LB09-5.2B-8  | 56.0                 | 4.8        |
| LUS 2/3-10  | 37.5                 | 1.0        | LB08-7-7                     | 52.0                 | 6.7        | LB09-5.2B-9  | 66.0                 | 6.7        |
| LUS 2/3-11  | 51.5                 | 1.1        | LB08-7-8                     | 59.0                 | 7.3        | LB09-5.2B-10 | 59.0                 | 5.0        |
| LUS 2/3-12  | 39.4                 | 1.6        | LB08-7-9                     | 58.0                 | 4.6        | LB09-5.2B-11 | 61.0                 | 4.6        |
| LUS 2/3-13  | 35.9                 | 0.7        | LB08-7-10                    | 55.0                 | 5.4        | LB09-5.2B-12 | 63.0                 | 4.6        |
| LUS 2/3-14  | 38.5                 | 0.7        | LB08-7-11                    | 59.0                 | 5.7        | LB09-5.2B-13 | 62.0                 | 6.4        |
| LUS 2/3-15  | 868.5                | 30.1       | LB08-7-12                    | 53.0                 | 5.3        | LB09-5.2B-14 | 64.0                 | 3.3        |
| LUS 2/3-16  | 37.6                 | 0.8        | LB08-7-13                    | 59.0                 | 8.2        | LB09-5.2B-15 | 58.0                 | 5.8        |
| LUS 2/3-17  | 37.2                 | 0.7        | LB08-7-14                    | 60.0                 | 6.3        | LB09-5.2B-16 | 62.0                 | 5.4        |
| LUS 2/3-18  | 39.8                 | 1.1        | LB08-12-1                    | 56.0                 | 7.3        | LB09-5.2B-17 | 61.0                 | 4.4        |
| LUS 2/3-19  | 38.5                 | 0.7        | LB08-12-2                    | 56.0                 | 3.6        | LB09-5.2B-18 | 60.0                 | 5.2        |
| LUS 2/3-20  | 36.3                 | 1.1        | LB08-12-3                    | 60.0                 | 3.4        | LB09-11.4A-1 | 40.0                 | 2.4        |
| LUS 2/3-21  | 34.1                 | 0.7        | LB08-12-4                    | 58.0                 | 8.6        | LB09-11.4A-2 | 41.0                 | 2.6        |
| LUS 2/3-22  | 50.9                 | 0.7        | LB08-12-5                    | 57.0                 | 5.1        | LB09-11.4A-3 | 39.0                 | 3.2        |
| LUS 2/3-23  | 31.5                 | 0.8        | LB08-12-6                    | 59.0                 | 7.8        | LB09-11.4A-4 | 38.0                 | 2.2        |

| Sample name    | Zircon U-Pb Age (Ma) | Error (Ma) | Sample name    | Zircon U-Pb Age (Ma) | Error (Ma) | Sample name | Zircon U-Pb Age (Ma) | Error (Ma) |
|----------------|----------------------|------------|----------------|----------------------|------------|-------------|----------------------|------------|
| LB09-11.4A-5   | 40.0                 | 2.2        | LB09-23.11A-11 | 67.0                 | 7.6        | PK06-11-11  | 104.0                | 7.2        |
| LB09-11.4A-6   | 39.0                 | 1.7        | LB09-23.11A-12 | 67.0                 | 6.8        | PK06-11-12  | 107.0                | 11.3       |
| LB09-11.4A-7   | 41.0                 | 2.3        | LB09-23.11A-13 | 63.0                 | 4.5        | PK06-11-13  | 101.0                | 6.6        |
| LB09-11.4A-8   | 40.0                 | 2.1        | LB09-23.11A-14 | 63.0                 | 3.8        | PK06-11-14  | 96.0                 | 10.7       |
| LB09-11.4A-9   | 40.0                 | 1.8        | LB09-23.11A-15 | 59.0                 | 3.8        | PK06-11-15  | 105.0                | 6.2        |
| LB09-11.5A-1   | 29.0                 | 2.5        | LB09-23.11A-16 | 62.0                 | 5.5        | PGAK-26-1   | 76.0                 | 11.3       |
| LB09-11.5A-2   | 29.0                 | 4.3        | LB09-23.11A-17 | 60.0                 | 4.1        | PGAK-26-2   | 76.0                 | 6.9        |
| LB09-11.5A-3   | 31.0                 | 4.0        | LB09-24.5-1    | 49.0                 | 13.2       | PGAK-26-3   | 71.0                 | 5.6        |
| LB09-11.5A-4   | 32.0                 | 6.1        | LB09-24.5-2    | 60.0                 | 17.3       | PGAK-26-4   | 76.0                 | 5.7        |
| LB09-11.5A-5   | 28.0                 | 4.3        | LB09-24.5-3    | 49.0                 | 5.6        | PGAK-26-5   | 73.0                 | 7.5        |
| LB09-11.5A-6   | 28.0                 | 3.4        | LB09-24.5-4    | 47.0                 | 8.1        | PGAK-26-6   | 74.0                 | 6.6        |
| LB09-11.5A-7   | 32.0                 | 3.7        | LB09-24.5-5    | 52.0                 | 6.8        | PGAK-26-7   | 68.0                 | 11.2       |
| LB09-11.5A-8   | 31.0                 | 2.1        | LB09-24.5-6    | 53.0                 | 4.1        | PGAK-26-8   | 79.0                 | 5.9        |
| LB09-11.5A-9   | 32.0                 | 4.5        | LB09-24.5-7    | 46.0                 | 5.2        | PGAK-26-9   | 74.0                 | 7.7        |
| LB09-11.5A-10  | 31.0                 | 2.3        | LB09-24.5-8    | 54.0                 | 6.5        | PGAK-26-10  | 71.0                 | 3.6        |
| LB09-11.5A-11  | 30.0                 | 1.6        | LB09-24.5-9    | 52.0                 | 9.7        | PGAK-26-11  | 67.0                 | 5.0        |
| LB09-11.5A-12  | 30.0                 | 3.4        | LB09-24.5-10   | 51.0                 | 8.6        | PGAK-26-12  | 74.0                 | 6.3        |
| LB09-11.5A-13  | 29.0                 | 3.3        | LB09-24.5-11   | 50.0                 | 5.4        | PGAK-26-13  | 73.0                 | 5.1        |
| LB09-11.5A-14  | 78.0                 | 12.0       | LB09-24.5-12   | 51.0                 | 7.9        | PGAK-26-14  | 72.0                 | 10.3       |
| LB09-21.3A-1   | 101.0                | 8.8        | LB09-24.5-13   | 52.0                 | 6.5        | PGAK-26-15  | 73.0                 | 18.3       |
| LB09-21.3A-2   | 91.0                 | 19.2       | LB09-24.5-14   | 51.0                 | 7.0        | PGAK-26-16  | 72.0                 | 5.0        |
| LB09-21.3A-3   | 95.0                 | 12.2       | LB09-24.5-15   | 53.0                 | 3.6        | PGAK-26-17  | 75.0                 | 6.0        |
| LB09-21.3A-4   | 95.0                 | 8.9        | LB09-30-1      | 46.0                 | 13.5       | PGAK-26-18  | 70.0                 | 5.0        |
| LB09-21.3A-5   | 96.0                 | 23.2       | LB09-30-2      | 43.0                 | 7.5        | PGAK-26-19  | 70.0                 | 7.2        |
| LB09-21.3A-6   | 90.0                 | 14.1       | LB09-30-3      | 47.0                 | 13.7       | PGAK-26-20  | 71.0                 | 6.5        |
| LB09-21.3A-7   | 101.0                | 19.2       | LB09-30-4      | 55.0                 | 6.9        | PGUP-15-1   | 60.0                 | 4.5        |
| LB09-21.3A-8   | 98.0                 | 14.5       | LB09-30-5      | 60.0                 | 6.2        | PGUP-15-2   | 57.0                 | 5.1        |
| LB09-21.3A-9   | 106.0                | 95.8       | LB09-30-6      | 56.0                 | 7.1        | PGUP-15-3   | 58.0                 | 6.1        |
| LB09-21.3A-10  | 92.0                 | 9.9        | LB09-30-7      | 52.0                 | 4.8        | PGUP-15-4   | 54.0                 | 7.7        |
| LB09-21.3A-11  | 97.0                 | 7.8        | LB09-30-8      | 53.0                 | 4.4        | PGUP-15-5   | 56.0                 | 4.5        |
| LB09-21.3A-12  | 109.0                | 11.2       | LB09-30-9      | 56.0                 | 10.5       | PGUP-15-6   | 57.0                 | 8.5        |
| LB09-21.3A-13  | 100.0                | 6.9        | LB09-30-10     | 51.0                 | 6.3        | PGUP-15-7   | 60.0                 | 4.3        |
| LB09-21.3A-14  | 103.0                | 7.1        | LB09-30-11     | 51.0                 | 10.6       | PGUP-15-8   | 60.0                 | 4.2        |
| LB09-21.3A-15  | 98.0                 | 6.3        | LB09-30-12     | 53.0                 | 4.7        | PGUP-15-9   | 57.0                 | 4.6        |
| LB09-22.7-1    | 79.0                 | 19.3       | LB09-30-13     | 52.0                 | 3.7        | PGUP-15-10  | 60.0                 | 8.0        |
| LB09-22.7-2    | 74.0                 | 6.3        | LB09-30-14     | 50.0                 | 5.1        | PGUP-15-11  | 56.0                 | 7.3        |
| LB09-22.7-3    | 70.0                 | 4.7        | LB09-30-15     | 52.0                 | 2.9        | PGUP-15-12  | 60.0                 | 3.3        |
| LB09-22.7-4    | 73.0                 | 6.9        | LB09-30-16     | 56.0                 | 6.0        | PGUP-15-13  | 61.0                 | 4.4        |
| LB09-22.7-5    | 70.0                 | 6.8        | LB09-30-17     | 52.0                 | 5.4        | PJA-4-1     | 29.0                 | 2.2        |
| LB09-22.7-6    | 75.0                 | 10.6       | LB09-30-18     | 52.0                 | 7.9        | PJA-4-2     | 33.0                 | 2.1        |
| LB09-22.7-7    | 76.0                 | 6.8        | LB09-30-19     | 55.0                 | 6.0        | PJA-4-3     | 30.0                 | 2.8        |
| LB09-22.7-8    | 71.0                 | 5.3        | LB09-48-1      | 54.0                 | 6.5        | PJA-4-4     | 28.0                 | 1.9        |
| LB09-22.7-9    | 71.0                 | 4.5        | LB09-48-2      | 51.0                 | 5.0        | PJA-4-5     | 29.0                 | 3.3        |
| LB09-22.7-10   | 76.0                 | 13.9       | LB09-48-3      | 54.0                 | 8.0        | PJA-4-6     | 28.0                 | 7.3        |
| LB09-22.7-11   | 73.0                 | 8.3        | LB09-48-4      | 54.0                 | 11.7       | PJA-4-7     | 29.0                 | 4.9        |
| LB09-22.7-12   | 73.0                 | 5.1        | LB09-48-5      | 50.0                 | 6.6        | PJA-4-8     | 32.0                 | 3.3        |
| LB09-22.7-13   | 71.0                 | 7.6        | LB09-48-6      | 53.0                 | 16.0       | PJA-4-9     | 31.0                 | 2.0        |
| LB09-22.7-14   | 72.0                 | 4.0        | LB09-48-7      | 52.0                 | 6.5        | PJA-4-10    | 30.0                 | 4.0        |
| LB09-22.7-15   | 65.0                 | 8.5        | LB09-48-8      | 51.0                 | 20.4       | Pba-4-1     | 62.0                 | 7.8        |
| LB09-22.7-16   | 69.0                 | 8.3        | LB09-48-9      | 58.0                 | 4.1        | Pba-4-2     | 60.0                 | 6.2        |
| LB09-22.7-17   | 68.0                 | 5.3        | LB09-48-10     | 49.0                 | 5.8        | Pba-4-3     | 62.0                 | 7.3        |
| LB09-22.7-18   | 77.0                 | 7.9        | LB09-48-11     | 52.0                 | 12.3       | Pba-4-4     | 62.0                 | 3.6        |
| LB09-22.7-19   | 71.0                 | 12.1       | LB09-48-12     | 58.0                 | 7.2        | Pba-4-5     | 65.0                 | 7.7        |
| LB09-22.7-20   | 73.0                 | 6.7        | LB09-48-13     | 51.0                 | 5.7        | Pba-4-6     | 61.0                 | 5.9        |
| LB09-23.11A-1  | 66.0                 | 5.4        | PK06-11-1      | 102.0                | 7.5        | Pba-4-7     | 57.0                 | 4.9        |
| LB09-23.11A-2  | 62.0                 | 5.9        | PK06-11-2      | 103.0                | 6.9        | Pba-4-8     | 58.0                 | 4.6        |
| LB09-23.11A-3  | 61.0                 | 6.1        | PK06-11-3      | 98.0                 | 7.3        | Pba-4-9     | 62.0                 | 35.9       |
| LB09-23.11A-4  | 53.0                 | 8.4        | PK06-11-4      | 97.0                 | 8.8        | Pba-4-10    | 55.0                 | 11.3       |
| LB09-23.11A-5  | 66.0                 | 6.3        | PK06-11-5      | 91.0                 | 8.7        | Pba-4-11    | 65.0                 | 4.3        |
| LB09-23.11A-6  | 66.0                 | 6.3        | PK06-11-6      | 103.0                | 8.2        | Pba-4-12    | 63.0                 | 10.2       |
| LB09-23.11A-7  | 61.0                 | 6.0        | PK06-11-7      | 97.0                 | 9.3        | Pba-4-13    | 62.0                 | 5.8        |
| LB09-23.11A-8  | 62.0                 | 9.9        | PK06-11-8      | 99.0                 | 7.9        | Pba-4-14    | 61.0                 | 12.5       |
| LB09-23.11A-9  | 60.0                 | 7.0        | PK06-11-9      | 108.0                | 10.9       | Pba-15-1    | 71.0                 | 15.2       |
| LB09-23.11A-10 | 64.0                 | 7.9        | PK06-11-10     | 23.0                 | 2.3        | Pba-15-2    | 73.0                 | 7.6        |

| Sample name  | Zircon U-Pb Age (Ma) | Error (Ma) |
|--------------|----------------------|------------|
| Pba-15-3     | 74.0                 | 10.7       |
| Pba-15-4     | 71.0                 | 9.0        |
| Pba-15-5     | 74.0                 | 10.1       |
| Pba-15-6     | 62.0                 | 7.2        |
| Pba-15-7     | 63.0                 | 8.9        |
| Pba-15-8     | 65.0                 | 12.6       |
| Pba-15-9     | 46.0                 | 7.1        |
| Pba-15-10    | 42.0                 | 7.0        |
| Pba-15-11    | 76.0                 | 12.2       |
| Pba-15-12    | 68.0                 | 12.1       |
| PK05-20-1    | 41.0                 | 3.1        |
| PK05-20-2    | 43.0                 | 2.2        |
| PK05-20-3    | 42.0                 | 2.7        |
| PK05-20-4    | 43.0                 | 3.1        |
| PK05-20-5    | 44.0                 | 1.9        |
| PK05-20-6    | 42.0                 | 2.8        |
| PK05-20-7    | 39.0                 | 3.3        |
| PK05-20-8    | 41.0                 | 2.6        |
| PK05-20-9    | 41.0                 | 2.7        |
| PK06-36-1    | 48.0                 | 9.5        |
| PK06-36-2    | 48.0                 | 7.5        |
| PK06-36-3    | 46.0                 | 7.9        |
| PK06-36-4    | 44.0                 | 7.3        |
| PK06-36-5    | 53.0                 | 7.4        |
| PK06-36-6    | 33.0                 | 5.6        |
| PK06-36-7    | 49.0                 | 3.5        |
| PK06-36-8    | 43.0                 | 7.3        |
| PK06-36-9    | 51.0                 | 5.3        |
| PK06-36-10   | 46.0                 | 12.8       |
| PK06-36-11   | 47.0                 | 5.6        |
| PK06-36-12   | 46.0                 | 10.3       |
| PK06-36-13   | 43.0                 | 3.8        |
| PK06-36-14   | 36.0                 | 4.3        |
| PK06-36-15   | 47.0                 | 6.3        |
| PK06-36-16   | 29.0                 | 5.1        |
| PK06-36-17   | 44.0                 | 5.7        |
| PK06-36-18   | 40.0                 | 12.5       |
| PK06-36-19   | 46.0                 | 3.5        |
| PK06-36-20   | 44.0                 | 6.0        |
| PK05-16-1    | 40.0                 | 2.6        |
| PK05-16-2    | 43.0                 | 4.7        |
| PK05-16-3    | 43.0                 | 3.7        |
| PK05-16-4    | 43.0                 | 3.0        |
| PK05-16-5    | 39.0                 | 3.4        |
| PK05-16-6    | 42.0                 | 2.4        |
| PK05-16-7    | 42.0                 | 3.0        |
| PK05-16-8    | 40.0                 | 3.7        |
| PK05-16-9    | 42.0                 | 3.1        |
| LB08-31-1    | 55.0                 | 10.5       |
| LB08-31-2    | 57.0                 | 7.6        |
| LB08-31-3    | 60.0                 | 6.2        |
| LB08-31-4    | 58.0                 | 5.8        |
| LB08-31-5    | 58.0                 | 4.5        |
| LB08-31-6    | 62.0                 | 6.3        |
| LB08-31-7    | 62.0                 | 13.1       |
| LB08-31-8    | 61.0                 | 7.7        |
| LB08-31-9    | 57.0                 | 6.0        |
| LB08-31-10   | 54.0                 | 10.1       |
| LB08-31-11   | 57.0                 | 10.3       |
| LB08-31-12   | 60.0                 | 5.1        |
| LB08-31-13   | 62.0                 | 6.9        |
| LB09-16.6A-1 | 59.0                 | 3.9        |
| LB09-16.6A-2 | 66.0                 | 9.9        |
| LB09-16.6A-3 | 57.0                 | 6.3        |

| Sample name   | Zircon U-Pb Age (Ma) | Error (Ma) |
|---------------|----------------------|------------|
| LB09-16.6A-4  | 64.0                 | 5.3        |
| LB09-16.6A-5  | 61.0                 | 5.9        |
| LB09-16.6A-6  | 62.0                 | 7.9        |
| LB09-16.6A-7  | 62.0                 | 5.3        |
| LB09-16.6A-8  | 58.0                 | 9.7        |
| LB09-16.6A-9  | 58.0                 | 5.0        |
| LB09-16.6A-10 | 62.0                 | 9.2        |
| LB09-16.6A-11 | 61.0                 | 4.0        |
| LB09-16.6A-12 | 66.0                 | 14.8       |
| LB09-16.6A-13 | 62.0                 | 7.8        |
| LB09-16.6A-14 | 62.0                 | 10.0       |
| LB09-16.6A-15 | 62.0                 | 8.3        |
| LB09-16.6A-16 | 64.0                 | 6.1        |
| LB09-33-1     | 64.0                 | 16.8       |
| LB09-33-2     | 68.0                 | 9.1        |
| LB09-33-3     | 73.0                 | 5.5        |
| LB09-33-4     | 70.0                 | 11.8       |
| LB09-33-5     | 68.0                 | 8.2        |
| LB09-33-6     | 70.0                 | 13.3       |
| LB09-33-7     | 72.0                 | 6.4        |
| LB09-33-8     | 65.0                 | 6.9        |
| LB09-33-9     | 66.0                 | 9.7        |
| LB09-33-10    | 65.0                 | 6.6        |
| LB09-33-11    | 69.0                 | 12.3       |
| LB09-33-12    | 59.0                 | 12.7       |
| LB09-33-13    | 61.0                 | 5.5        |
| LB09-33-14    | 64.0                 | 2.6        |
| KO8-4-1       | 32.0                 | 1.4        |
| KO8-4-2       | 32.0                 | 1.6        |
| KO8-4-3       | 29.0                 | 8.1        |
| KO8-4-4       | 32.0                 | 2.2        |
| KO8-4-5       | 30.0                 | 4.5        |
| KO8-4-6       | 31.0                 | 1.9        |
| KO8-4-7       | 31.0                 | 2.7        |
| O1A-7-1       | 39.0                 | 3.0        |
| O1A-7-2       | 41.0                 | 4.7        |
| O1A-7-3       | 40.0                 | 4.1        |
| O1A-7-4       | 37.0                 | 4.2        |
| O1A-7-5       | 37.0                 | 2.6        |
| O1A-7-6       | 38.0                 | 3.7        |
| O1A-7-7       | 35.0                 | 5.6        |
| O1A-7-8       | 33.0                 | 5.9        |
| O1A-7-9       | 38.0                 | 5.9        |
| O1A-7-10      | 38.0                 | 3.2        |
| O1A-7-11      | 36.0                 | 3.0        |
| 01B-22-1      | 40.0                 | 20.6       |
| 01B-22-2      | 40.0                 | 1.7        |
| 01B-22-3      | 41.0                 | 2.8        |
| 01b-24-1      | 41.0                 | 1.5        |
| 01b-24-2      | 46.0                 | 13.4       |
| 01b-24-3      | 45.0                 | 6.0        |
| 01b-24-4      | 40.0                 | 2.3        |
| 01b-24-5      | 39.0                 | 3.4        |
| PGUP-9-1      | 58.0                 | 9.8        |
| PGUP-9-2      | 62.0                 | 5.5        |
| PGUP-9-3      | 71.0                 | 29.3       |
| PGUP-9-4      | 57.0                 | 6.2        |
| PGUP-9-5      | 60.0                 | 7.0        |
| PGUP-9-6      | 52.0                 | 7.3        |
| PGUP-9-7      | 57.0                 | 7.3        |
| PGUP-9-8      | 57.0                 | 8.6        |
| PGUP-9-9      | 62.0                 | 8.3        |
| PGUP-9-10     | 57.0                 | 7.7        |
| PGUP-9-11     | 59.0                 | 8.9        |

| Sample name  | Zircon U-Pb Age (Ma) | Error (Ma) |
|--------------|----------------------|------------|
| PGUP-9-12    | 56.0                 | 3.3        |
| PGUP-9-13    | 57.0                 | 7.6        |
| PGUP-9-14    | 61.0                 | 6.3        |
| PGUP-9-15    | 56.0                 | 7.7        |
| PGUP-9-16    | 62.0                 | 6.4        |
| PGUP-9-17    | 62.0                 | 3.8        |
| PGUP-9-18    | 56.0                 | 8.8        |
| PGUP-9-19    | 64.0                 | 6.4        |
| PGUP-9-20    | 64.0                 | 9.7        |
| PGUP-9-21    | 58.0                 | 7.3        |
| PGUP-16-1    | 24.0                 | 7.6        |
| PGUP-16-2    | 87.0                 | 17.4       |
| PGUP-16-3    | 80.0                 | 27.2       |
| PGUP-16-4    | 81.0                 | 17.2       |
| PGUP-16-5    | 83.0                 | 17.7       |
| PGUP-16-6    | 74.0                 | 15.7       |
| PGUP-16-7    | 18.0                 | 6.0        |
| PGUP-16-8    | 81.0                 | 9.2        |
| PGUP-16-9    | 85.0                 | 11.9       |
| PGUP-16-10   | 79.0                 | 10.4       |
| PGUP-16-11   | 84.0                 | 18.4       |
| PGUP-16-12   | 92.0                 | 18.9       |
| PGUP-16-13   | 89.0                 | 9.7        |
| PGUP-16-14   | 78.0                 | 11.2       |
| PGUP-16-15   | 80.0                 | 10.7       |
| PGUP-16-16   | 76.0                 | 13.7       |
| PGUP-16-17   | 83.0                 | 7.5        |
| PGUP-16-18   | 93.0                 | 10.5       |
| PGUP-16-19   | 82.0                 | 14.9       |
| PGUP-16-20   | 70.0                 | 13.3       |
| PGUP-16-21   | 89.0                 | 18.1       |
| PGUP-16-22   | 85.0                 | 12.1       |
| PGAK-13.1-1  | 35.0                 | 4.3        |
| PGAK-13.1-2  | 44.0                 | 5.3        |
| PGAK-13.1-3  | 51.0                 | 8.8        |
| PGAK-13.1-4  | 45.0                 | 3.6        |
| PGAK-13.1-5  | 47.0                 | 6.7        |
| PGAK-13.1-6  | 14.0                 | 5.0        |
| PGAK-13.1-7  | 46.0                 | 7.9        |
| PGAK-13.1-8  | 49.0                 | 5.8        |
| PGAK-13.1-9  | 49.0                 | 5.3        |
| PGAK-13.1-10 | 49.0                 | 4.9        |
| PGAK-13.1-11 | 48.0                 | 9.6        |
| PGAK-13.1-12 | 50.0                 | 6.1        |
| PGAK-13.1-13 | 50.0                 | 7.1        |
| PGAK-13.1-14 | 51.0                 | 6.3        |
| PGAK-13.1-15 | 49.0                 | 5.8        |
| PGAK-13.1-16 | 46.0                 | 5.9        |
| PGAK-18.5-1  | 44.0                 | 8.9        |
| PGAK-18.5-2  | 49.0                 | 7.3        |
| PGAK-18.5-3  | 54.0                 | 11.4       |
| PGAK-18.5-4  | 51.0                 | 8.3        |
| PGAK-18.5-5  | 48.0                 | 17.6       |
| PGAK-18.5-6  | 8.0                  | 2.2        |
| PGAK-18.5-7  | 18.0                 | 7.0        |
| PGAK-18.5-8  | 48.0                 | 7.5        |
| PGAK-18.5-9  | 54.0                 | 9.8        |
| PGAK-18.5-10 | 54.0                 | 7.4        |
| PGAK-18.5-11 | 48.0                 | 11.4       |
| PGAK-18.5-12 | 52.0                 | 10.7       |
| PGAK-18.5-13 | 51.0                 | 12.9       |
| LB09-16.7-1  | 49.0                 | 10.0       |
| LB09-16.7-2  | 54.0                 | 5.1        |
| LB09-16.7-3  | 55.0                 | 6.1        |

| Sample name  | Zircon U-Pb Age (Ma) | Error (Ma) |
|--------------|----------------------|------------|
| LB09-16.7-4  | 50.0                 | 5.1        |
| LB09-16.7-5  | 55.0                 | 6.6        |
| LB09-16.7-6  | 49.0                 | 5.7        |
| LB09-16.7-7  | 51.0                 | 6.5        |
| LB09-16.7-8  | 53.0                 | 7.5        |
| LB09-16.7-9  | 49.0                 | 5.0        |
| PK05-39-1    | 89.0                 | 8.4        |
| PK05-39-2    | 93.0                 | 14.1       |
| PK05-39-3    | 87.0                 | 6.7        |
| PK05-39-4    | 83.0                 | 10.1       |
| PK05-39-5    | 97.0                 | 26.2       |
| PK05-39-6    | 87.0                 | 7.7        |
| PK05-39-7    | 86.0                 | 11.8       |
| PK05-39-8    | 87.0                 | 9.8        |
| PK05-39-9    | 85.0                 | 6.4        |
| PK05-39-10   | 86.0                 | 10.3       |
| PK05-39-11   | 82.0                 | 13.3       |
| PK05-39-12   | 86.0                 | 13.6       |
| PK05-39-13   | 93.0                 | 9.9        |
| PK05-39-14   | 90.0                 | 10.3       |
| PGLT-19-1    | 54.0                 | 12.8       |
| PGLT-19-2    | 73.0                 | 14.5       |
| PGLT-19-3    | 68.0                 | 16.4       |
| PGLT-19-4    | 74.0                 | 9.6        |
| PGLT-19-5    | 19.0                 | 5.1        |
| PGLT-19-6    | 55.0                 | 15.3       |
| PGLT-19-7    | 66.0                 | 13.8       |
| PGLT-19-8    | 82.0                 | 13.2       |
| PGLT-19-9    | 51.0                 | 10.3       |
| PGLT-19-10   | 68.0                 | 22.8       |
| PGLT-19-11   | 61.0                 | 7.9        |
| PGLT-19-12   | 32.0                 | 8.9        |
| PGLT-19-13   | 36.0                 | 6.0        |
| PGLT-19-14   | 66.0                 | 15.5       |
| PGLT-19-15   | 54.0                 | 11.4       |
| PGLT-19-16   | 46.0                 | 13.0       |
| LB11-O-16-1  | 24.0                 | 5.3        |
| LB11-O-16-2  | 23.0                 | 2.6        |
| LB11-O-16-3  | 25.0                 | 4.1        |
| LB11-O-16-4  | 25.0                 | 2.7        |
| LB11-O-16-5  | 26.0                 | 4.4        |
| LB11-O-16-6  | 24.0                 | 3.7        |
| LB11-O-16-7  | 27.0                 | 3.7        |
| LB11-O-16-8  | 27.0                 | 3.4        |
| LB11-O-16-9  | 27.0                 | 8.5        |
| LB11-O-10-1  | 20.0                 | 5.0        |
| LB11-O-10-2  | 21.1                 | 2.5        |
| LB11-O-10-3  | 21.4                 | 2.2        |
| LB11-O-10-4  | 21.7                 | 1.7        |
| LB11-S-36-1  | 69.6                 | 4.3        |
| LB11-S-36-2  | 68.5                 | 4.3        |
| LB11-S-36-3  | 70.2                 | 6.6        |
| LB11-S-36-4  | 69.7                 | 5.1        |
| LB11-S-36-5  | 69.6                 | 5.7        |
| LB11-S-36-6  | 64.8                 | 5.0        |
| LB11-S-36-7  | 66.6                 | 4.6        |
| LB11-S-36-8  | 69.7                 | 6.0        |
| LB11-S-36-9  | 69.1                 | 3.7        |
| LB11-S-36-10 | 65.4                 | 11.3       |
| LB11-S-36-11 | 68.4                 | 10.3       |
| LB11-S-36-12 | 69.8                 | 14.1       |
| LB11-S-36-13 | 67.8                 | 5.3        |
| LB11-S-36-14 | 68.1                 | 7.3        |

Bosch et al., 2011

| Sample name | Zircon U-Pb Age (Ma) | Error (Ma) |
|-------------|----------------------|------------|
| KG06-1      | 102.1                | 1.8        |
| KG06-2      | 98.4                 | 2.8        |
| KG06-3      | 99.3                 | 3.9        |
| KG06-4      | 99.2                 | 1.6        |
| KG06-5      | 104.0                | 3.9        |
| KG06-6      | 94.4                 | 2.1        |
| KG06-7      | 95.6                 | 1.3        |
| KG06-8      | 95.7                 | 1.2        |
| KG06-9      | 100.8                | 6.5        |
| KG06-10     | 96.4                 | 2.6        |
| KG06-11     | 94.6                 | 5.1        |
| KG06-12     | 94.8                 | 2.9        |
| KG06-13     | 96.6                 | 2.5        |
| KG06-14     | 95.3                 | 2.5        |
| KG06-15     | 95.5                 | 0.7        |
| KG06-16     | 97.5                 | 0.7        |
| KG06-17     | 97.6                 | 2.6        |
| KG06-18     | 98.0                 | 2.1        |
| KG06-19     | 98.1                 | 1.3        |
| KG06-20     | 98.1                 | 1.0        |
| KG06-21     | 98.8                 | 1.1        |
| KG06-22     | 98.8                 | 0.8        |
| KG06-23     | 99.5                 | 0.6        |
| KG06-24     | 99.6                 | 2.1        |
| KG06-25     | 100.3                | 2.5        |
| KG06-26     | 100.3                | 1.5        |
| KG06-27     | 100.3                | 1.0        |
| KG06-28     | 98.5                 | 1.4        |
| KG06-29     | 96.0                 | 1.4        |
| KG06-30     | 97.6                 | 1.2        |
| KG06-31     | 98.8                 | 1.1        |
| KG06-32     | 107.1                | 0.7        |
| KG06-33     | 107.1                | 1.0        |
| KG06-34     | 107.2                | 0.9        |
| KG06-35     | 113.2                | 2.4        |
| KG06-36     | 113.7                | 1.4        |
| KG06-37     | 115.6                | 1.1        |
| KG06-38     | 110.1                | 1.2        |
| KG06-39     | 124.3                | 2.4        |
| KH04-12b-1  | 97.0                 | 2.0        |
| KH04-12b-2  | 99.3                 | 1.5        |
| KH04-12b-3  | 97.8                 | 4.0        |
| KH04-12b-4  | 97.0                 | 3.9        |
| KH04-12b-5  | 95.2                 | 5.1        |
| KH04-12b-6  | 96.6                 | 2.8        |
| KH04-12b-7  | 96.1                 | 3.3        |
| KH04-12b-8  | 96.8                 | 3.2        |
| KH04-12b-9  | 98.7                 | 2.2        |
| KH04-12b-10 | 96.8                 | 2.1        |
| KH04-12b-11 | 99.9                 | 2.3        |
| KH04-12b-12 | 97.8                 | 1.2        |
| KH04-12b-13 | 101.6                | 3.1        |
| KH04-12b-14 | 96.8                 | 2.7        |
| KH04-12b-15 | 102.4                | 3.3        |
| KH04-12b-16 | 97.1                 | 2.5        |
| KH04-12b-17 | 96.2                 | 1.0        |
| KH04-12b-18 | 96.6                 | 1.0        |
| KH04-12b-19 | 97.0                 | 1.3        |
| KH04-12b-20 | 97.5                 | 1.3        |
| KH04-12b-21 | 99.2                 | 4.4        |
| KH04-12b-22 | 99.5                 | 1.6        |
| KH04-12b-23 | 99.7                 | 1.3        |
| KH04-12b-24 | 99.7                 | 1.2        |
| KH04-12b-25 | 99.9                 | 1.2        |

| Sample name | Zircon U-Pb Age (Ma) | Error (Ma) |
|-------------|----------------------|------------|
| KH04-12b-26 | 99.9                 | 1.7        |
| KH04-12b-27 | 97.7                 | 1.5        |
| KH04-12b-28 | 90.1                 | 3.1        |
| KH04-12b-29 | 92.9                 | 0.8        |
| KH04-12b-30 | 90.3                 | 3.1        |
| KH04-12b-31 | 89.3                 | 1.1        |
| KH04-12b-32 | 90.6                 | 0.9        |
| KH04-12a-1  | 96.4                 | 0.7        |
| KH04-12a-2  | 91.1                 | 1.0        |
| KH04-12a-3  | 92.8                 | 0.6        |
| KH04-12a-4  | 118.4                | 2.0        |
| KH04-12a-5  | 97.0                 | 1.1        |
| KH04-12a-6  | 93.7                 | 0.9        |
| KH04-12a-7  | 90.9                 | 0.9        |
| KH04-12a-1  | 91.6                 | 6.1        |
| KH04-12a-2  | 89.7                 | 2.6        |
| KH04-12a-3  | 91.0                 | 1.1        |
| KH04-12a-4  | 90.4                 | 1.7        |
| KH04-12a-5  | 89.9                 | 1.8        |
| KH04-12a-6  | 90.7                 | 1.6        |
| KH04-12a-7  | 90.8                 | 1.3        |
| KH04-12a-8  | 90.4                 | 1.4        |
| KH04-12a-9  | 90.8                 | 1.4        |
| KH04-12a-10 | 91.2                 | 1.3        |
| KH04-12a-11 | 92.1                 | 1.8        |
| KH04-12a-12 | 91.9                 | 1.3        |
| KH04-12a-13 | 89.4                 | 0.9        |
| KH04-12a-14 | 91.1                 | 0.9        |
| KH04-12a-15 | 90.2                 | 1.9        |
| KH04-12a-16 | 91.0                 | 1.8        |
| KH04-12a-17 | 90.8                 | 1.6        |
| KH04-12a-18 | 89.1                 | 0.9        |
| KH04-12a-19 | 91.8                 | 1.4        |
| KH04-12a-20 | 90.1                 | 0.7        |
| KH04-12a-21 | 89.5                 | 0.4        |
| KH04-12a-22 | 91.2                 | 1.4        |
| KH04-12a-23 | 97.8                 | 0.8        |
| KH04-12a-24 | 98.2                 | 1.6        |
| KH04-12a-25 | 99.2                 | 0.6        |
| KH04-12a-26 | 104.9                | 6.7        |
| KH04-12a-27 | 102.3                | 2.8        |
| KH04-12a-28 | 102.1                | 3.0        |
| KH04-12a-29 | 103.1                | 4.1        |
| KH04-12a-30 | 105.4                | 3.4        |
| KH04-12a-31 | 103.1                | 1.4        |
| KH04-12a-32 | 102.1                | 0.7        |
| KH04-12a-33 | 97.3                 | 1.8        |
| KH04-12a-34 | 97.0                 | 0.4        |
| KH04-12a-35 | 97.9                 | 1.5        |
| KH04-12a-36 | 101.0                | 1.1        |
| KH04-12a-37 | 116.7                | 2.3        |
| KH04-12a-38 | 131.8                | 6.5        |
| KH04-12a-39 | 134.8                | 1.9        |
| KH04-12a-40 | 174.9                | 4.7        |
| KG17-1      | 100.4                | 0.5        |
| KG17-2      | 101.7                | 1.8        |
| KG17-3      | 103.4                | 2.6        |
| KG17-4      | 103.8                | 1.4        |
| KG17-5      | 103.7                | 1.5        |
| KG17-6      | 103.4                | 1.6        |
| KG17-7      | 103.1                | 0.9        |
| KG17-8      | 102.5                | 1.8        |
| KG17-9      | 101.9                | 1.0        |
| KG17-10     | 103.1                | 0.5        |

| Sample name | Zircon U-Pb Age (Ma) | Error (Ma) | Sample name            | Zircon U-Pb Age (Ma) | Error (Ma) | Sample name | Zircon U-Pb Age (Ma) | Error (Ma) |
|-------------|----------------------|------------|------------------------|----------------------|------------|-------------|----------------------|------------|
| KG17-11     | 102.4                | 0.3        | UM01-134-11            | 84.4                 | 2.3        | LE3-05C     | 47.5                 | 0.9        |
| KG17-12     | 102.9                | 0.3        | UM01-135-1             | 83.6                 | 3.0        | LE3-06      | 49.0                 | 2.0        |
| KG17-13     | 103.0                | 1.1        | UM01-135-2             | 80.9                 | 1.9        | LE3-07      | 49.0                 | 1.0        |
| KG17-14     | 109.6                | 0.7        | UM01-135-3             | 82.8                 | 1.4        | LE3-09      | 50.0                 | 2.0        |
| KG17-15     | 102.9                | 2.6        | UM01-135-4             | 80.5                 | 1.7        | LE3-10      | 49.0                 | 2.0        |
| KG17-16     | 103.5                | 1.3        | UM01-135-5             | 81.9                 | 1.9        | LE3-11      | 51.0                 | 2.0        |
| KG17-17     | 102.3                | 0.6        | UM01-135-6             | 83.8                 | 2.5        | LE3-12      | 51.0                 | 1.0        |
| KG17-18     | 102.2                | 0.5        | UM01-135-7             | 80.1                 | 1.5        | LE3-13      | 46.0                 | 1.0        |
| KG17-19     | 103.1                | 2.7        | UM01-135-8             | 79.6                 | 4.0        | LE3-14      | 50.0                 | 1.0        |
| KG18-1      | 100.5                | 0.6        | UM01-135-9             | 82.6                 | 2.0        | LE3-15      | 50.0                 | 1.0        |
| KG18-2      | 101.5                | 0.8        | UM01-135-10            | 78.4                 | 2.2        | LE4-01      | 49.3                 | 1.0        |
| KG18-3      | 100.3                | 2.6        | UM01-135-11            | 79.9                 | 3.4        | LE4-02      | 48.4                 | 1.0        |
| KG18-4      | 99.9                 | 1.4        | UM01-135-12            | 83.8                 | 2.6        | LE4-03      | 51.0                 | 1.0        |
| KG18-5      | 100.8                | 1.1        | UM01-135-13            | 82.4                 | 2.0        | LE4-03C     | 49.6                 | 1.0        |
| KG18-6      | 101.0                | 2.3        | UM01-135-14            | 79.3                 | 0.8        | LE4-04      | 51.0                 | 1.0        |
| KG18-7      | 100.7                | 0.7        | UM01-135-15            | 81.0                 | 2.0        | LE4-05      | 51.0                 | 1.0        |
| KG18-8      | 102.9                | 0.7        | UM01-135-16            | 81.5                 | 1.2        | LE4-06      | 47.9                 | 1.0        |
| KG18-9      | 102.2                | 1.7        | UM01-135-17            | 80.4                 | 1.8        | LE4-07      | 50.0                 | 1.0        |
| KG18-10     | 101.0                | 0.7        | UM01-135-18            | 79.8                 | 1.1        | LE4-08      | 47.5                 | 1.0        |
| KG18-11     | 103.0                | 0.7        | UM01-135-19            | 83.5                 | 3.1        | LE4-11      | 52.0                 | 1.0        |
| KG18-12     | 101.9                | 0.6        | UM01-135-20            | 79.3                 | 2.3        | LE4-12      | 53.0                 | 1.0        |
| KG18-13     | 100.3                | 1.3        | UM01-135-21            | 82.3                 | 3.4        | LE4-13      | 50.0                 | 1.0        |
| KG18-14     | 99.7                 | 1.4        | UM01-135-22            | 82.2                 | 1.5        | LE4-14      | 50.0                 | 1.0        |
| KG18-15     | 102.7                | 1.4        | UM01-135-23            | 80.7                 | 1.3        | LE4-15      | 50.0                 | 1.0        |
| KG31-1      | 89.4                 | 0.5        | Shellnutt et al., 2014 |                      |            | LE5-01      | 57.0                 | 1.0        |
| KG31-2      | 91.6                 | 1.0        | LE01-01                | 51.0                 | 1.0        | LE5-02      | 53.0                 | 1.0        |
| KG31-3      | 89.6                 | 1.0        | LE01-02                | 49.0                 | 1.0        | LE5-02C     | 53.0                 | 1.0        |
| KG31-4      | 91.5                 | 1.8        | LE01-03                | 46.3                 | 0.9        | LE5-03      | 55.0                 | 1.0        |
| KG31-5      | 90.0                 | 1.4        | LE01-04                | 45.7                 | 0.9        | LE5-04      | 56.0                 | 1.0        |
| KG31-6      | 89.1                 | 1.0        | LE01-06                | 49.3                 | 0.9        | LE5-05      | 56.0                 | 1.0        |
| KG31-7      | 90.2                 | 0.7        | LE01-07                | 47.0                 | 0.9        | LE5-06      | 58.0                 | 1.0        |
| KG31-8      | 89.9                 | 0.7        | LE01-08                | 48.0                 | 1.0        | LE5-07      | 56.0                 | 1.0        |
| KG31-9      | 90.0                 | 1.3        | LE01-09                | 47.1                 | 0.9        | LE5-09      | 57.0                 | 1.0        |
| KG31-10     | 88.8                 | 0.9        | LE01-11                | 46.8                 | 0.9        | LE5-10      | 59.0                 | 1.0        |
| KG31-11     | 91.6                 | 1.1        | LE01-12                | 48.0                 | 0.9        | LE5-11      | 55.0                 | 1.0        |
| UM01-133-1  | 82.3                 | 3.3        | LE01-14                | 47.6                 | 0.9        | LE5-12      | 53.0                 | 1.0        |
| UM01-133-2  | 85.4                 | 1.4        | LE01-15                | 46.6                 | 1.0        | LE5-13      | 55.0                 | 1.0        |
| UM01-133-3  | 83.5                 | 0.7        | LE01-16                | 49.1                 | 1.0        | LE5-14      | 56.0                 | 1.0        |
| UM01-133-4  | 85.4                 | 1.8        | LE01-17                | 47.2                 | 0.9        | LE5-15      | 55.0                 | 1.0        |
| UM01-133-5  | 81.5                 | 1.8        | LE01-19                | 49.1                 | 1.0        | LE5-16      | 58.0                 | 1.0        |
| UM01-133-6  | 84.4                 | 0.8        | LE01-20                | 47.0                 | 1.0        | LE5-17      | 56.0                 | 1.0        |
| UM01-133-7  | 84.7                 | 1.7        | LE02-01                | 52.0                 | 2.0        | LE5-19      | 56.0                 | 1.0        |
| UM01-133-8  | 82.0                 | 1.1        | LE02-02                | 49.0                 | 1.0        | LE5-20      | 55.0                 | 1.0        |
| UM01-133-9  | 83.7                 | 5.0        | LE02-03                | 48.0                 | 1.0        | LE6-05      | 56.0                 | 1.0        |
| UM01-133-10 | 84.8                 | 2.7        | LE02-04                | 48.0                 | 1.0        | LE6-09      | 58.0                 | 1.0        |
| UM01-133-11 | 78.9                 | 2.1        | LE02-05                | 49.0                 | 3.0        | LE6-10      | 54.0                 | 1.0        |
| UM01-133-12 | 83.7                 | 3.7        | LE02-06                | 48.0                 | 1.0        | LE6-11      | 53.0                 | 1.0        |
| UM01-133-13 | 82.3                 | 2.7        | LE02-07                | 51.0                 | 2.0        | LE6-12      | 56.0                 | 1.0        |
| UM01-133-14 | 82.9                 | 1.6        | LE02-08                | 50.0                 | 1.0        | LE6-13      | 54.0                 | 1.0        |
| UM01-133-15 | 83.4                 | 0.4        | LE02-09                | 48.0                 | 1.0        | LE6-14      | 55.0                 | 1.0        |
| UM01-133-16 | 81.7                 | 0.8        | LE02-10                | 52.0                 | 1.0        | LE6-15      | 56.0                 | 1.0        |
| UM01-133-17 | 83.5                 | 1.6        | LE02-11                | 48.0                 | 1.0        | LE6-16      | 54.0                 | 1.0        |
| UM01-133-18 | 82.5                 | 4.0        | LE02-12                | 48.0                 | 1.0        | LE6-16C     | 57.0                 | 1.0        |
| UM01-133-19 | 82.1                 | 4.7        | LE02-13                | 49.0                 | 1.0        | LE6-17      | 55.0                 | 1.0        |
| UM01-134-1  | 83.3                 | 2.6        | LE02-14                | 48.0                 | 1.0        | LE6-18      | 57.0                 | 1.0        |
| UM01-134-2  | 84.6                 | 3.1        | LE02-15                | 48.0                 | 1.0        | LE6-20      | 57.0                 | 1.0        |
| UM01-134-3  | 84.9                 | 3.2        | LE02-16                | 52.0                 | 1.0        | LE7-01      | 55.0                 | 1.0        |
| UM01-134-4  | 83.5                 | 1.7        | LE02-17                | 48.0                 | 2.0        | LE7-02      | 55.0                 | 1.0        |
| UM01-134-5  | 85.6                 | 0.4        | LE02-18                | 51.0                 | 1.0        | LE7-04      | 58.0                 | 1.0        |
| UM01-134-6  | 85.1                 | 3.4        | LE02-19                | 49.0                 | 1.0        | LE7-05      | 53.0                 | 1.0        |
| UM01-134-7  | 84.3                 | 0.9        | LE02-20                | 52.0                 | 1.0        | LE7-06      | 54.0                 | 1.0        |
| UM01-134-8  | 83.7                 | 0.3        | LE3-01                 | 52.0                 | 2.0        | LE7-07      | 56.0                 | 1.0        |
| UM01-134-9  | 85.1                 | 1.3        | LE3-02                 | 47.0                 | 2.0        | LE7-08      | 56.0                 | 1.0        |
| UM01-134-10 | 86.5                 | 1.8        | LE3-05                 | 55.0                 | 2.0        | LE7-09      | 58.0                 | 1.0        |

| Sample name | Zircon U-<br>Pb Age<br>(Ma) | Error<br>(Ma) |
|-------------|-----------------------------|---------------|
| LE7-10      | 52.0                        | 2.0           |
| LE7-11      | 59.0                        | 1.0           |
| LE7-12      | 57.0                        | 1.0           |
| LE7-13      | 56.0                        | 1.0           |
| LE7-14      | 55.0                        | 1.0           |
| LE7-16      | 58.0                        | 2.0           |
| LE7-16C     | 57.0                        | 1.0           |
| LE7-17      | 56.0                        | 1.0           |
| LE7-18      | 55.0                        | 2.0           |
| LE7-20      | 57.0                        | 1.0           |
| LE9-02      | 60.0                        | 2.0           |
| LE9-03      | 58.0                        | 1.0           |
| LE9-04      | 55.0                        | 2.0           |
| LE9-05      | 57.0                        | 2.0           |
| LE9-07      | 55.0                        | 1.0           |
| LE9-08      | 59.0                        | 1.0           |
| LE9-09      | 57.0                        | 1.0           |
| LE9-10      | 60.0                        | 1.0           |
| LE9-11      | 54.0                        | 1.0           |
| LE9-12      | 54.0                        | 1.0           |
| LE9-13      | 58.0                        | 1.0           |
| LE9-14      | 56.0                        | 1.0           |
| LE9-15      | 58.0                        | 1.0           |
| LE9-16      | 57.0                        | 1.0           |
| LE11-01     | 56.0                        | 1.0           |
| LE11-02     | 60.0                        | 1.0           |
| LE11-03     | 56.0                        | 1.0           |
| LE11-04     | 56.0                        | 1.0           |
| LE11-05     | 57.0                        | 1.0           |
| LE11-07     | 59.0                        | 1.0           |
| LE11-08     | 55.0                        | 1.0           |
| LE11-09     | 57.0                        | 1.0           |
| LE11-10     | 60.0                        | 1.0           |
| LE11-11     | 58.0                        | 1.0           |
| LE11-11C    | 59.0                        | 1.0           |
| LE11-12     | 57.0                        | 1.0           |
| LE11-13     | 58.0                        | 1.0           |
| LE11-14     | 56.0                        | 1.0           |
| LE11-15     | 57.0                        | 1.0           |
| LE11-16     | 57.0                        | 1.0           |
| LE11-17     | 58.0                        | 1.0           |
| LE11-18     | 58.0                        | 1.0           |
| LE11-19     | 58.0                        | 1.0           |
| LE11-20     | 59.0                        | 1.0           |



**Table DR9. Compiled Zircon U-Pb Ages of Tectonic Blocks (Tethyan Himalaya-Nepal) \***

|                         |               | Zircon U-Pb Age<br>(Ma) | Error<br>(Ma) | Zircon U-Pb Age<br>(Ma) | Error<br>(Ma) | Zircon U-Pb Age<br>(Ma) | Error<br>(Ma) |
|-------------------------|---------------|-------------------------|---------------|-------------------------|---------------|-------------------------|---------------|
| Zircon U-Pb Age<br>(Ma) | Error<br>(Ma) | 1510.9                  | 57.6          | 1235.6                  | 59.8          | 1628.2                  | 18.6          |
| 527.7                   | 12.4          | 1522.4                  | 82.2          | 1247.8                  | 21.4          | 1730.0                  | 27.2          |
| 534.5                   | 5.1           | 1554.4                  | 52.6          | 1270.0                  | 29.0          | 1733.7                  | 21.8          |
| 538.6                   | 11.4          | 1560.3                  | 32.5          | 1310.0                  | 21.0          | 1735.2                  | 26.1          |
| 544.5                   | 5.2           | 1578.7                  | 43.6          | 1337.9                  | 9.1           | 1743.3                  | 27.5          |
| 567.3                   | 7.5           | 1585.0                  | 29.5          | 1413.7                  | 2.2           | 1747.9                  | 27.1          |
| 588.7                   | 5.6           | 1600.9                  | 51.7          | 1783.0                  | 27.4          | 1751.4                  | 10.9          |
| 605.4                   | 15.0          | 1643.4                  | 27.8          | 1830.5                  | 47.3          | 1757.2                  | 23.7          |
| 726.7                   | 8.6           | 1652.7                  | 38.4          | 1845.0                  | 14.8          | 1762.2                  | 32.2          |
| 761.9                   | 12.3          | 1654.9                  | 33.4          | 1864.2                  | 12.1          | 1783.1                  | 19.9          |
| 771.8                   | 16.5          | 1667.1                  | 49.6          | 2640.0                  | 19.0          | 1784.9                  | 28.0          |
| 831.1                   | 59.3          | 1684.8                  | 25.7          | 2670.0                  | 18.8          | 1791.4                  | 27.9          |
| 847.3                   | 59.2          | 1771.1                  | 23.0          | 3404.0                  | 16.0          | 1795.7                  | 23.0          |
| 848.6                   | 62.4          | 1780.3                  | 41.7          | 495.4                   | 9.0           | 1799.6                  | 30.5          |
| 881.6                   | 45.6          | 1801.8                  | 30.2          | 495.6                   | 6.7           | 1812.6                  | 26.5          |
| 914.0                   | 48.2          | 1876.9                  | 65.7          | 503.6                   | 29.3          | 1850.4                  | 30.3          |
| 920.2                   | 34.8          | 1879.8                  | 38.6          | 511.3                   | 8.8           | 1861.6                  | 33.4          |
| 923.0                   | 43.2          | 1901.7                  | 45.8          | 636.5                   | 17.7          | 1866.8                  | 19.5          |
| 928.3                   | 84.9          | 1913.8                  | 59.4          | 645.7                   | 31.7          | 1907.7                  | 29.7          |
| 931.2                   | 43.5          | 2061.9                  | 57.0          | 652.6                   | 14.5          | 1912.1                  | 19.5          |
| 948.5                   | 26.8          | 2086.2                  | 47.0          | 653.6                   | 25.6          | 1913.3                  | 25.6          |
| 973.5                   | 31.4          | 2126.8                  | 27.8          | 682.2                   | 18.9          | 1918.6                  | 34.5          |
| 975.0                   | 23.2          | 2225.1                  | 30.5          | 691.4                   | 25.3          | 1964.1                  | 27.1          |
| 997.5                   | 32.9          | 2390.2                  | 42.4          | 696.5                   | 13.3          | 2005.7                  | 31.8          |
| 999.9                   | 34.3          | 2437.3                  | 17.6          | 704.0                   | 17.8          | 2084.3                  | 17.5          |
| 1000.6                  | 39.8          | 2474.8                  | 24.3          | 869.0                   | 18.1          | 2116.4                  | 22.4          |
| 1002.6                  | 48.9          | 2483.9                  | 58.0          | 879.4                   | 24.6          | 2298.5                  | 25.9          |
| 1004.6                  | 44.2          | 2485.3                  | 40.1          | 879.5                   | 12.4          | 2333.2                  | 25.9          |
| 1010.6                  | 56.0          | 2485.9                  | 37.9          | 898.1                   | 14.8          | 2478.0                  | 14.1          |
| 1022.7                  | 55.9          | 2503.7                  | 37.9          | 899.6                   | 21.2          | 2490.5                  | 29.1          |
| 1023.8                  | 39.3          | 2504.1                  | 38.2          | 929.7                   | 24.0          | 2534.0                  | 23.2          |
| 1027.5                  | 33.6          | 2544.6                  | 38.9          | 940.3                   | 22.2          | 2571.9                  | 30.3          |
| 1032.0                  | 71.8          | 2687.3                  | 46.5          | 942.7                   | 12.8          | 2606.0                  | 30.0          |
| 1032.2                  | 50.5          | 2700.5                  | 32.9          | 949.4                   | 13.5          | 2606.2                  | 26.5          |
| 1032.3                  | 51.7          | 2774.3                  | 44.9          | 983.4                   | 16.1          | 2641.4                  | 23.7          |
| 1033.0                  | 53.4          | 3053.3                  | 88.6          | 1026.9                  | 32.9          | 2655.3                  | 29.3          |
| 1040.1                  | 72.3          | 3218.3                  | 22.1          | 1055.5                  | 27.7          | 2686.7                  | 27.3          |
| 1048.9                  | 45.2          | 599.0                   | 19.2          | 1087.5                  | 33.0          | 2698.7                  | 19.4          |
| 1049.4                  | 69.4          | 770.0                   | 9.9           | 1101.7                  | 38.1          | 2800.8                  | 18.0          |
| 1049.9                  | 41.3          | 2634.0                  | 3.0           | 1103.7                  | 38.3          | 2805.0                  | 22.6          |
| 1068.0                  | 34.2          | 501.2                   | 12.5          | 1106.8                  | 22.5          | 2838.7                  | 28.2          |
| 1073.0                  | 51.0          | 503.2                   | 16.4          | 1116.9                  | 44.8          | 2888.5                  | 22.4          |
| 1081.3                  | 42.1          | 514.1                   | 8.7           | 1128.4                  | 34.2          | 3291.1                  | 22.6          |
| 1088.2                  | 39.8          | 516.1                   | 5.1           | 1129.1                  | 30.2          | 525.0                   | 5.0           |
| 1106.8                  | 70.0          | 518.2                   | 5.4           | 1136.0                  | 31.9          | 532.0                   | 5.0           |
| 1110.3                  | 27.0          | 525.4                   | 20.1          | 1143.7                  | 29.9          | 542.0                   | 6.0           |
| 1111.3                  | 41.6          | 650.1                   | 13.5          | 1181.3                  | 23.1          | 546.0                   | 8.0           |
| 1119.8                  | 45.5          | 732.2                   | 17.3          | 1197.5                  | 31.8          | 548.0                   | 6.0           |
| 1120.7                  | 80.4          | 766.5                   | 15.7          | 1199.7                  | 30.5          | 550.0                   | 6.0           |
| 1122.0                  | 41.3          | 770.3                   | 18.3          | 1205.3                  | 27.0          | 558.0                   | 10.0          |
| 1126.0                  | 38.7          | 781.8                   | 16.6          | 1208.2                  | 34.5          | 569.0                   | 6.0           |
| 1142.4                  | 42.8          | 828.9                   | 18.2          | 1212.6                  | 33.7          | 592.0                   | 6.0           |
| 1160.8                  | 31.3          | 843.3                   | 22.2          | 1213.4                  | 28.1          | 593.0                   | 7.0           |
| 1172.9                  | 27.1          | 1063.3                  | 44.7          | 1219.2                  | 28.7          | 605.0                   | 10.0          |
| 1201.4                  | 43.4          | 1069.2                  | 76.3          | 1222.7                  | 19.2          | 613.0                   | 7.0           |
| 1209.7                  | 56.5          | 1097.0                  | 20.0          | 1224.5                  | 30.7          | 619.0                   | 6.0           |
| 1264.6                  | 59.2          | 1101.0                  | 37.0          | 1228.0                  | 24.2          | 621.0                   | 7.0           |
| 1333.6                  | 72.2          | 1153.3                  | 8.7           | 1236.3                  | 30.3          | 625.0                   | 8.0           |
| 1400.1                  | 19.6          | 1162.1                  | 55.1          | 1236.3                  | 34.2          | 630.0                   | 7.0           |
| 1429.4                  | 55.7          | 1163.0                  | 119.2         | 1239.8                  | 29.4          | 633.0                   | 7.0           |
| 1432.2                  | 43.1          | 1163.5                  | 23.8          | 1324.8                  | 26.2          | 639.0                   | 7.0           |
| 1506.5                  | 53.7          | 1164.1                  | 26.1          | 1337.6                  | 25.6          | 649.0                   | 7.0           |
|                         |               | 1182.4                  | 86.0          | 1341.0                  | 33.5          | 649.0                   | 7.0           |
|                         |               | 1217.5                  | 49.0          | 1356.0                  | 24.5          | 672.0                   | 7.0           |
|                         |               | 1219.0                  | 31.0          | 1367.9                  | 17.2          | 722.0                   | 10.0          |

| Zircon U-Pb Age<br>(Ma) | Error<br>(Ma) |
|-------------------------|---------------|-------------------------|---------------|-------------------------|---------------|-------------------------|---------------|
| 730.0                   | 7.0           | 923.0                   | 12.0          | 1126.0                  | 9.0           | 820.5                   | 26.2          |
| 736.0                   | 7.0           | 923.0                   | 11.0          | 1142.0                  | 37.0          | 825.5                   | 21.9          |
| 742.0                   | 26.0          | 926.0                   | 12.0          | 1153.0                  | 34.0          | 828.8                   | 18.3          |
| 752.0                   | 11.0          | 940.0                   | 11.0          | 1229.0                  | 21.0          | 850.9                   | 25.3          |
| 752.0                   | 7.0           | 948.0                   | 10.0          | 1234.0                  | 34.0          | 854.0                   | 19.3          |
| 764.0                   | 9.0           | 949.0                   | 12.0          | 1272.0                  | 6.0           | 863.4                   | 19.5          |
| 784.0                   | 9.0           | 952.0                   | 13.0          | 1348.0                  | 26.0          | 864.4                   | 19.6          |
| 784.0                   | 8.0           | 965.0                   | 12.0          | 1372.0                  | 25.0          | 866.0                   | 40.6          |
| 803.0                   | 10.0          | 967.0                   | 14.0          | 1400.0                  | 9.0           | 870.2                   | 21.9          |
| 865.0                   | 11.0          | 984.0                   | 13.0          | 1407.0                  | 13.0          | 871.7                   | 20.5          |
| 869.0                   | 9.0           | 986.0                   | 12.0          | 1448.0                  | 11.0          | 889.0                   | 58.2          |
| 881.0                   | 9.0           | 989.0                   | 57.0          | 1498.0                  | 42.0          | 889.7                   | 20.7          |
| 899.0                   | 9.0           | 992.0                   | 11.0          | 1501.0                  | 16.0          | 890.4                   | 21.5          |
| 909.0                   | 11.0          | 1023.0                  | 50.0          | 1507.0                  | 11.0          | 905.5                   | 21.8          |
| 912.0                   | 10.0          | 1043.0                  | 166.0         | 1559.0                  | 53.0          | 906.6                   | 22.6          |
| 933.0                   | 9.0           | 1062.0                  | 25.0          | 1561.0                  | 39.0          | 916.1                   | 51.4          |
| 940.0                   | 10.0          | 1078.0                  | 31.0          | 1602.0                  | 21.0          | 939.7                   | 21.5          |
| 941.0                   | 9.0           | 1104.0                  | 33.0          | 1607.0                  | 8.0           | 940.2                   | 21.7          |
| 948.0                   | 9.0           | 1107.0                  | 25.0          | 1620.0                  | 11.0          | 943.0                   | 21.0          |
| 948.0                   | 10.0          | 1168.0                  | 21.0          | 1641.0                  | 14.0          | 963.0                   | 21.8          |
| 960.0                   | 9.0           | 1207.0                  | 106.0         | 1701.0                  | 6.0           | 964.8                   | 23.5          |
| 1035.0                  | 20.0          | 1292.0                  | 19.0          | 1746.0                  | 16.0          | 964.8                   | 21.4          |
| 1043.0                  | 58.0          | 1330.0                  | 187.0         | 1746.0                  | 45.0          | 971.8                   | 22.0          |
| 1043.0                  | 16.0          | 1424.0                  | 12.0          | 1997.0                  | 7.0           | 982.8                   | 22.3          |
| 1051.0                  | 34.0          | 1425.0                  | 16.0          | 2108.0                  | 3.0           | 983.2                   | 44.1          |
| 1071.0                  | 9.0           | 1448.0                  | 67.0          | 2224.0                  | 9.0           | 1008.8                  | 26.8          |
| 1093.0                  | 13.0          | 1593.0                  | 22.0          | 2298.0                  | 4.0           | 1023.8                  | 63.5          |
| 1107.0                  | 15.0          | 1626.0                  | 26.0          | 2369.0                  | 10.0          | 1029.7                  | 20.9          |
| 1843.0                  | 62.0          | 1645.0                  | 22.0          | 2477.0                  | 7.0           | 1034.4                  | 22.4          |
| 2232.0                  | 14.0          | 1743.0                  | 13.0          | 2491.0                  | 20.0          | 1053.5                  | 25.3          |
| 2247.0                  | 5.0           | 2182.0                  | 11.0          | 2520.0                  | 7.0           | 1062.3                  | 21.3          |
| 2416.0                  | 4.0           | 2224.0                  | 19.0          | 2560.0                  | 10.0          | 1062.7                  | 23.7          |
| 2437.0                  | 9.0           | 2429.0                  | 25.0          | 2617.0                  | 12.0          | 1065.9                  | 21.5          |
| 2448.0                  | 12.0          | 2456.0                  | 11.0          | 2704.0                  | 7.0           | 1066.0                  | 23.8          |
| 3340.0                  | 3.0           | 2493.0                  | 4.0           | 2732.0                  | 16.0          | 1073.2                  | 20.2          |
| 3399.0                  | 2.0           | 2688.0                  | 7.0           | 2810.0                  | 9.0           | 1074.1                  | 25.3          |
| 3636.0                  | 597.0         | 302.0                   | 3.0           | 2897.0                  | 5.0           | 1078.5                  | 21.0          |
| 283.0                   | 3.0           | 386.0                   | 13.0          | 481.4                   | 10.2          | 1088.8                  | 21.5          |
| 330.0                   | 4.0           | 459.0                   | 5.0           | 494.7                   | 11.8          | 1095.9                  | 20.4          |
| 353.0                   | 4.0           | 512.0                   | 5.0           | 497.3                   | 10.8          | 1097.2                  | 21.0          |
| 409.0                   | 4.0           | 522.0                   | 5.0           | 505.0                   | 10.8          | 1129.2                  | 20.1          |
| 493.0                   | 7.0           | 560.0                   | 6.0           | 510.3                   | 10.9          | 1129.3                  | 21.6          |
| 506.0                   | 9.0           | 629.0                   | 12.0          | 517.2                   | 14.2          | 1142.4                  | 20.0          |
| 521.0                   | 7.0           | 637.0                   | 6.0           | 524.4                   | 11.9          | 1147.7                  | 21.4          |
| 523.0                   | 5.0           | 753.0                   | 9.0           | 524.6                   | 12.8          | 1163.2                  | 20.1          |
| 532.0                   | 8.0           | 765.0                   | 8.0           | 525.5                   | 11.6          | 1164.4                  | 20.0          |
| 541.0                   | 6.0           | 787.0                   | 8.0           | 525.6                   | 12.2          | 1194.2                  | 20.2          |
| 545.0                   | 6.0           | 802.0                   | 8.0           | 525.7                   | 12.3          | 1231.1                  | 33.2          |
| 568.0                   | 6.0           | 827.0                   | 8.0           | 530.0                   | 12.2          | 1264.9                  | 19.9          |
| 595.0                   | 6.0           | 848.0                   | 9.0           | 530.4                   | 11.7          | 1274.0                  | 19.6          |
| 657.0                   | 7.0           | 867.0                   | 8.0           | 531.1                   | 14.5          | 1363.7                  | 19.5          |
| 672.0                   | 8.0           | 871.0                   | 9.0           | 538.8                   | 11.8          | 1370.2                  | 19.6          |
| 751.0                   | 9.0           | 873.0                   | 9.0           | 544.8                   | 12.0          | 1380.9                  | 19.6          |
| 766.0                   | 8.0           | 876.0                   | 8.0           | 562.4                   | 12.4          | 1388.4                  | 19.5          |
| 803.0                   | 10.0          | 886.0                   | 9.0           | 564.4                   | 13.9          | 1398.1                  | 20.1          |
| 814.0                   | 14.0          | 888.0                   | 9.0           | 572.0                   | 12.7          | 1454.1                  | 19.4          |
| 817.0                   | 9.0           | 890.0                   | 14.0          | 595.8                   | 13.5          | 1490.4                  | 19.1          |
| 826.0                   | 9.0           | 897.0                   | 13.0          | 607.5                   | 14.6          | 1637.5                  | 18.7          |
| 845.0                   | 9.0           | 905.0                   | 11.0          | 645.5                   | 16.5          | 1735.3                  | 18.5          |
| 888.0                   | 9.0           | 917.0                   | 10.0          | 741.8                   | 18.0          | 1744.3                  | 18.3          |
| 894.0                   | 9.0           | 960.0                   | 10.0          | 756.4                   | 20.3          | 1963.0                  | 18.1          |
| 897.0                   | 13.0          | 980.0                   | 13.0          | 796.0                   | 17.7          | 2454.1                  | 17.0          |
| 898.0                   | 12.0          | 1024.0                  | 18.0          | 797.3                   | 20.6          | 2476.5                  | 20.6          |
| 901.0                   | 10.0          | 1050.0                  | 21.0          | 800.7                   | 20.4          | 2480.0                  | 16.9          |
| 922.0                   | 9.0           | 1126.0                  | 23.0          | 814.5                   | 20.0          | 2496.9                  | 16.9          |

| Zircon U-Pb Age<br>(Ma) | Error<br>(Ma) |
|-------------------------|---------------|-------------------------|---------------|-------------------------|---------------|-------------------------|---------------|
| 2506.4                  | 16.8          | 944.8                   | 10.7          | 851.1                   | 18.5          | 2524.8                  | 19.2          |
| 2511.3                  | 22.7          | 952.0                   | 12.4          | 873.8                   | 21.2          | 2525.5                  | 56.6          |
| 2710.2                  | 16.5          | 960.5                   | 31.3          | 883.1                   | 9.2           | 2613.1                  | 16.7          |
| 3083.0                  | 16.0          | 968.5                   | 11.7          | 883.6                   | 16.3          | 2632.4                  | 23.1          |
| 483.6                   | 7.3           | 975.5                   | 13.6          | 885.5                   | 25.0          | 2844.4                  | 26.6          |
| 485.1                   | 8.5           | 978.8                   | 12.5          | 902.2                   | 16.8          | 2857.8                  | 25.2          |
| 485.5                   | 5.9           | 1021.8                  | 21.0          | 902.3                   | 25.2          | 2919.8                  | 34.2          |
| 503.8                   | 5.9           | 1055.6                  | 22.8          | 909.9                   | 14.3          | 368.7                   | 7.2           |
| 507.8                   | 5.9           | 1065.2                  | 21.2          | 912.2                   | 8.5           | 400.6                   | 7.2           |
| 508.6                   | 6.2           | 1093.6                  | 22.6          | 914.2                   | 14.1          | 406.1                   | 8.1           |
| 515.2                   | 8.0           | 1095.8                  | 20.5          | 915.0                   | 18.9          | 512.7                   | 7.2           |
| 516.2                   | 7.0           | 1107.7                  | 37.4          | 915.7                   | 9.8           | 516.1                   | 7.7           |
| 524.9                   | 7.1           | 1148.6                  | 22.1          | 919.0                   | 9.2           | 520.6                   | 6.0           |
| 528.1                   | 6.3           | 1190.2                  | 20.9          | 920.2                   | 8.6           | 532.6                   | 7.9           |
| 529.4                   | 6.8           | 1209.0                  | 19.9          | 934.0                   | 8.7           | 540.0                   | 15.0          |
| 532.5                   | 6.6           | 1225.4                  | 19.7          | 935.8                   | 17.1          | 540.7                   | 12.6          |
| 537.1                   | 7.1           | 1237.1                  | 20.3          | 940.0                   | 19.6          | 543.2                   | 9.8           |
| 542.2                   | 6.3           | 1246.0                  | 21.5          | 943.8                   | 16.1          | 544.4                   | 8.0           |
| 549.4                   | 9.6           | 1256.6                  | 19.9          | 943.9                   | 10.6          | 547.6                   | 6.5           |
| 550.9                   | 6.4           | 1266.7                  | 20.3          | 944.4                   | 15.4          | 554.7                   | 6.6           |
| 559.6                   | 7.4           | 1319.0                  | 21.0          | 945.8                   | 8.8           | 557.2                   | 7.6           |
| 567.1                   | 6.4           | 1331.5                  | 19.5          | 952.2                   | 8.9           | 562.4                   | 9.9           |
| 571.0                   | 7.6           | 1332.4                  | 20.8          | 953.1                   | 22.2          | 610.3                   | 11.8          |
| 571.9                   | 9.3           | 1417.9                  | 19.4          | 953.3                   | 21.9          | 624.9                   | 6.0           |
| 597.6                   | 10.2          | 1496.5                  | 19.5          | 959.0                   | 8.9           | 627.5                   | 10.9          |
| 614.5                   | 11.9          | 1515.0                  | 19.5          | 961.2                   | 18.0          | 643.2                   | 17.7          |
| 621.9                   | 8.7           | 1521.2                  | 19.3          | 963.0                   | 14.5          | 648.2                   | 6.2           |
| 657.0                   | 7.9           | 1735.4                  | 20.1          | 968.2                   | 27.2          | 669.2                   | 9.7           |
| 733.8                   | 9.0           | 1770.6                  | 18.5          | 973.8                   | 9.9           | 678.1                   | 14.6          |
| 747.0                   | 26.4          | 1771.4                  | 18.4          | 982.2                   | 11.4          | 684.4                   | 14.7          |
| 751.0                   | 9.0           | 2465.7                  | 17.9          | 1002.7                  | 11.1          | 685.8                   | 7.7           |
| 753.7                   | 11.3          | 2486.7                  | 16.9          | 1025.4                  | 27.9          | 731.2                   | 37.4          |
| 763.5                   | 9.3           | 2501.1                  | 17.1          | 1026.1                  | 15.7          | 734.7                   | 8.1           |
| 768.9                   | 15.0          | 2511.9                  | 16.9          | 1050.5                  | 10.7          | 786.1                   | 8.7           |
| 770.6                   | 10.4          | 2519.6                  | 16.8          | 1051.4                  | 12.8          | 790.4                   | 12.1          |
| 778.1                   | 10.3          | 2523.3                  | 17.3          | 1054.7                  | 13.8          | 796.7                   | 21.0          |
| 791.5                   | 16.1          | 2543.9                  | 16.8          | 1060.7                  | 11.2          | 801.3                   | 22.8          |
| 794.1                   | 9.2           | 506.2                   | 6.1           | 1074.0                  | 14.2          | 809.2                   | 22.6          |
| 796.0                   | 14.1          | 513.4                   | 10.6          | 1087.1                  | 25.6          | 811.5                   | 9.5           |
| 797.6                   | 14.8          | 514.5                   | 10.5          | 1149.9                  | 47.3          | 827.4                   | 29.0          |
| 803.3                   | 12.6          | 519.3                   | 5.0           | 1286.0                  | 20.1          | 841.6                   | 7.9           |
| 812.0                   | 10.7          | 520.7                   | 5.0           | 1318.1                  | 59.0          | 850.7                   | 9.1           |
| 819.3                   | 12.5          | 522.5                   | 7.4           | 1495.1                  | 49.8          | 873.3                   | 8.2           |
| 821.1                   | 10.7          | 527.6                   | 7.3           | 1559.2                  | 50.7          | 877.7                   | 12.6          |
| 829.4                   | 11.2          | 543.0                   | 10.9          | 1590.3                  | 91.0          | 906.4                   | 8.5           |
| 831.1                   | 11.2          | 547.8                   | 7.1           | 1614.2                  | 22.4          | 918.3                   | 13.4          |
| 831.8                   | 9.9           | 548.3                   | 5.3           | 1695.6                  | 25.1          | 922.1                   | 30.6          |
| 832.0                   | 29.8          | 548.9                   | 9.8           | 1696.5                  | 21.2          | 927.4                   | 22.8          |
| 837.1                   | 14.2          | 556.8                   | 10.2          | 1713.4                  | 30.4          | 933.0                   | 13.0          |
| 839.6                   | 10.5          | 565.4                   | 7.4           | 1776.3                  | 27.7          | 933.9                   | 9.0           |
| 845.4                   | 11.2          | 570.4                   | 13.4          | 1911.0                  | 31.1          | 935.2                   | 11.7          |
| 845.5                   | 29.3          | 585.3                   | 8.1           | 1918.8                  | 52.0          | 937.9                   | 21.7          |
| 873.8                   | 22.0          | 616.9                   | 7.1           | 1928.2                  | 29.4          | 949.7                   | 12.5          |
| 876.9                   | 21.3          | 618.0                   | 5.9           | 1928.4                  | 42.5          | 951.8                   | 12.9          |
| 878.1                   | 10.2          | 672.8                   | 7.2           | 1957.3                  | 46.2          | 952.3                   | 8.9           |
| 881.9                   | 12.1          | 699.2                   | 12.3          | 2223.7                  | 64.5          | 957.0                   | 9.2           |
| 889.3                   | 10.9          | 702.8                   | 25.0          | 2432.7                  | 29.0          | 959.2                   | 14.4          |
| 894.1                   | 11.6          | 752.7                   | 11.9          | 2434.0                  | 18.6          | 963.7                   | 17.2          |
| 901.1                   | 13.1          | 764.5                   | 11.4          | 2436.6                  | 17.0          | 968.7                   | 9.0           |
| 909.6                   | 12.7          | 783.7                   | 12.3          | 2470.7                  | 32.1          | 969.2                   | 18.3          |
| 917.0                   | 19.8          | 801.5                   | 7.5           | 2473.3                  | 22.8          | 971.4                   | 9.0           |
| 924.0                   | 13.4          | 811.1                   | 7.8           | 2506.7                  | 28.6          | 973.0                   | 9.5           |
| 924.5                   | 10.9          | 812.3                   | 7.6           | 2506.9                  | 46.8          | 973.6                   | 9.0           |
| 929.9                   | 14.1          | 821.6                   | 7.7           | 2512.2                  | 27.2          | 976.9                   | 9.1           |
| 931.9                   | 11.6          | 847.2                   | 17.9          | 2512.7                  | 33.8          | 977.0                   | 10.1          |

| Zircon U-Pb Age<br>(Ma) | Error<br>(Ma) |
|-------------------------|---------------|-------------------------|---------------|-------------------------|---------------|-------------------------|---------------|
| 978.2                   | 10.8          | 600.8                   | 47.5          | 2517.4                  | 17.0          | 774.7                   | 12.3          |
| 979.0                   | 21.2          | 602.2                   | 5.7           | 2648.5                  | 62.4          | 775.3                   | 14.1          |
| 983.9                   | 9.1           | 606.6                   | 7.4           | 2654.2                  | 24.2          | 841.0                   | 9.5           |
| 984.3                   | 9.1           | 659.1                   | 7.0           | 2659.4                  | 24.7          | 860.0                   | 8.1           |
| 990.0                   | 9.2           | 704.8                   | 14.6          | 2860.3                  | 16.3          | 884.9                   | 11.3          |
| 990.8                   | 11.7          | 740.4                   | 14.4          | 2955.3                  | 16.1          | 885.1                   | 8.3           |
| 1032.7                  | 75.6          | 759.0                   | 10.7          | 3156.4                  | 15.9          | 890.6                   | 12.6          |
| 1078.1                  | 29.3          | 764.1                   | 10.4          | 3257.3                  | 30.2          | 903.7                   | 23.4          |
| 1079.9                  | 62.6          | 770.0                   | 29.0          | 3264.1                  | 33.2          | 906.0                   | 20.8          |
| 1089.6                  | 25.2          | 770.4                   | 30.9          | 3317.9                  | 43.1          | 906.7                   | 10.1          |
| 1090.1                  | 40.3          | 809.3                   | 16.7          | 3445.6                  | 18.8          | 915.0                   | 15.9          |
| 1098.4                  | 25.4          | 815.6                   | 10.4          | 485.0                   | 33.9          | 915.8                   | 10.7          |
| 1125.8                  | 19.9          | 853.5                   | 43.1          | 543.0                   | 11.9          | 925.3                   | 21.4          |
| 1195.8                  | 31.4          | 881.7                   | 16.0          | 500.0                   | 7.5           | 930.6                   | 16.6          |
| 1196.7                  | 34.1          | 856.7                   | 22.0          | 542.0                   | 5.9           | 938.8                   | 8.7           |
| 1216.7                  | 26.7          | 924.1                   | 15.1          | 920.0                   | 7.1           | 951.4                   | 13.9          |
| 1218.4                  | 46.4          | 917.4                   | 34.2          | 963.0                   | 7.6           | 955.3                   | 19.6          |
| 1330.4                  | 39.9          | 901.7                   | 16.5          | 2608.0                  | 6.0           | 968.4                   | 34.0          |
| 1332.2                  | 19.3          | 904.9                   | 26.7          | 498.8                   | 6.3           | 968.7                   | 9.0           |
| 1431.5                  | 19.7          | 881.1                   | 14.2          | 513.8                   | 7.8           | 979.9                   | 9.1           |
| 1463.0                  | 39.6          | 907.7                   | 33.3          | 516.8                   | 6.7           | 981.5                   | 26.1          |
| 1779.9                  | 40.1          | 889.8                   | 25.4          | 526.0                   | 10.8          | 992.1                   | 19.7          |
| 1786.9                  | 18.2          | 892.6                   | 11.2          | 527.2                   | 13.8          | 993.3                   | 22.4          |
| 1879.4                  | 43.1          | 967.3                   | 9.0           | 530.1                   | 12.1          | 998.0                   | 9.6           |
| 1896.3                  | 25.9          | 939.3                   | 17.9          | 530.2                   | 5.1           | 1005.0                  | 12.0          |
| 2063.2                  | 21.9          | 917.9                   | 23.4          | 536.4                   | 11.4          | 1013.1                  | 9.4           |
| 2380.1                  | 39.0          | 968.7                   | 19.1          | 539.8                   | 5.2           | 1026.8                  | 9.5           |
| 2421.2                  | 22.4          | 1004.7                  | 13.7          | 540.9                   | 8.1           | 1032.1                  | 34.8          |
| 2437.4                  | 16.9          | 944.2                   | 13.8          | 542.2                   | 6.8           | 1035.6                  | 14.3          |
| 2466.9                  | 20.8          | 1002.4                  | 31.1          | 543.9                   | 9.4           | 1048.7                  | 16.5          |
| 2477.1                  | 16.9          | 953.5                   | 20.1          | 544.8                   | 7.3           | 1050.0                  | 27.4          |
| 2493.4                  | 22.7          | 885.5                   | 81.7          | 545.3                   | 6.5           | 1051.3                  | 11.8          |
| 2498.0                  | 21.6          | 986.0                   | 26.5          | 546.3                   | 6.8           | 1101.8                  | 35.2          |
| 2507.5                  | 22.5          | 1003.3                  | 29.2          | 549.3                   | 9.9           | 1137.5                  | 24.3          |
| 2508.3                  | 29.6          | 1014.9                  | 38.3          | 550.9                   | 5.3           | 1218.2                  | 28.3          |
| 2532.3                  | 16.8          | 1027.0                  | 36.0          | 552.7                   | 6.3           | 1318.8                  | 55.2          |
| 2582.1                  | 17.2          | 1040.0                  | 48.5          | 553.4                   | 15.5          | 1463.9                  | 26.4          |
| 2628.1                  | 18.5          | 1050.3                  | 47.0          | 555.4                   | 5.9           | 1467.6                  | 26.2          |
| 2716.2                  | 19.6          | 1058.3                  | 39.6          | 555.8                   | 6.2           | 1599.0                  | 45.7          |
| 2830.2                  | 16.3          | 1072.2                  | 63.1          | 556.0                   | 5.3           | 1790.3                  | 42.6          |
| 2877.2                  | 23.9          | 1082.1                  | 34.7          | 558.4                   | 7.2           | 1798.1                  | 33.5          |
| 3607.1                  | 15.5          | 1087.7                  | 29.6          | 558.6                   | 5.5           | 1855.5                  | 18.8          |
| 485.2                   | 8.5           | 1088.3                  | 34.9          | 564.2                   | 13.5          | 1938.7                  | 19.7          |
| 486.4                   | 8.2           | 1092.3                  | 20.0          | 565.7                   | 10.0          | 1966.9                  | 20.5          |
| 491.4                   | 13.6          | 1166.9                  | 35.5          | 566.6                   | 8.5           | 2048.9                  | 20.3          |
| 495.4                   | 13.2          | 1172.1                  | 33.5          | 570.5                   | 8.6           | 2077.3                  | 34.7          |
| 496.1                   | 7.2           | 1181.2                  | 23.9          | 570.8                   | 6.7           | 2289.0                  | 37.7          |
| 500.3                   | 13.0          | 1225.2                  | 41.1          | 573.0                   | 10.1          | 2293.9                  | 17.2          |
| 503.6                   | 11.8          | 1239.3                  | 19.7          | 580.8                   | 19.5          | 2388.1                  | 20.8          |
| 507.5                   | 8.5           | 1245.8                  | 24.9          | 586.4                   | 5.6           | 2484.1                  | 23.9          |
| 510.8                   | 18.2          | 1266.7                  | 31.8          | 590.7                   | 12.9          | 2489.8                  | 35.9          |
| 515.4                   | 7.0           | 1273.8                  | 21.9          | 602.0                   | 21.3          | 2524.5                  | 35.1          |
| 518.3                   | 5.5           | 1322.3                  | 33.9          | 603.1                   | 9.0           | 2532.8                  | 25.3          |
| 518.8                   | 10.5          | 1389.7                  | 20.9          | 612.8                   | 9.9           | 2574.3                  | 22.1          |
| 518.8                   | 9.1           | 1636.3                  | 48.5          | 625.2                   | 16.7          | 2584.7                  | 21.7          |
| 521.4                   | 12.7          | 1968.8                  | 17.8          | 625.3                   | 19.8          | 2656.4                  | 34.3          |
| 523.7                   | 9.0           | 2005.0                  | 42.4          | 638.3                   | 13.0          | 2733.1                  | 28.6          |
| 523.7                   | 5.8           | 2095.7                  | 38.7          | 643.6                   | 18.3          | 2737.6                  | 22.2          |
| 523.8                   | 6.1           | 2412.9                  | 23.6          | 645.4                   | 6.1           | 2781.4                  | 21.0          |
| 527.3                   | 6.3           | 2466.5                  | 22.8          | 647.8                   | 6.7           | 2790.8                  | 30.9          |
| 535.1                   | 5.4           | 2469.6                  | 22.8          | 651.2                   | 7.2           | 3272.3                  | 15.7          |
| 552.5                   | 11.8          | 2477.4                  | 44.2          | 668.2                   | 7.7           | 3328.0                  | 21.6          |
| 562.0                   | 6.1           | 2499.3                  | 27.3          | 671.9                   | 17.9          | 3523.5                  | 21.1          |
| 563.2                   | 24.3          | 2502.3                  | 18.5          | 706.8                   | 8.7           | 258.4                   | 7.6           |
| 583.3                   | 13.6          | 2507.5                  | 30.1          | 707.2                   | 12.6          | 426.1                   | 5.8           |

| Zircon U-Pb Age<br>(Ma) | Error<br>(Ma) |
|-------------------------|---------------|-------------------------|---------------|-------------------------|---------------|-------------------------|---------------|
| 459.1                   | 4.4           | 1387.3                  | 41.3          | 582.5                   | 20.6          | 3457.4                  | 15.5          |
| 512.4                   | 10.9          | 1398.6                  | 41.8          | 586.0                   | 28.1          | 516.0                   | 2.5           |
| 517.3                   | 6.0           | 1410.6                  | 31.2          | 587.8                   | 25.2          | 500.0                   | 8.0           |
| 517.7                   | 10.4          | 1448.3                  | 57.5          | 627.2                   | 17.3          | 568.0                   | 4.7           |
| 522.4                   | 5.8           | 1518.4                  | 45.3          | 634.1                   | 13.2          | 499.0                   | 2.6           |
| 532.3                   | 14.4          | 1574.4                  | 61.2          | 674.8                   | 10.3          | 842.0                   | 3.6           |
| 536.4                   | 6.4           | 1641.6                  | 78.4          | 679.7                   | 7.1           | 766.0                   | 12.3          |
| 540.4                   | 8.0           | 1650.3                  | 226.8         | 694.5                   | 11.6          | 907.0                   | 5.5           |
| 543.2                   | 6.8           | 1652.7                  | 39.7          | 694.7                   | 9.6           | 1218.0                  | 9.0           |
| 564.3                   | 20.2          | 1657.0                  | 147.5         | 708.1                   | 12.3          | 1810.0                  | 13.0          |
| 567.3                   | 13.0          | 1739.5                  | 28.4          | 722.6                   | 11.6          | 2299.0                  | 5.0           |
| 571.9                   | 28.0          | 1804.2                  | 18.2          | 725.2                   | 27.4          | 464.8                   | 4.5           |
| 579.2                   | 8.5           | 1824.9                  | 35.2          | 730.0                   | 23.0          | 484.8                   | 4.7           |
| 583.9                   | 8.6           | 1835.3                  | 18.5          | 733.8                   | 14.7          | 508.1                   | 12.7          |
| 593.4                   | 10.0          | 1970.1                  | 24.2          | 760.8                   | 58.9          | 508.2                   | 6.1           |
| 604.2                   | 7.4           | 2036.6                  | 48.3          | 780.1                   | 20.4          | 511.3                   | 5.2           |
| 630.6                   | 10.8          | 2097.2                  | 61.0          | 835.5                   | 29.5          | 515.2                   | 26.5          |
| 670.2                   | 11.9          | 2111.2                  | 33.2          | 840.2                   | 25.2          | 532.4                   | 5.1           |
| 685.9                   | 10.2          | 2287.5                  | 70.4          | 876.5                   | 13.7          | 533.4                   | 8.0           |
| 687.8                   | 33.1          | 2362.2                  | 53.3          | 877.9                   | 16.5          | 538.0                   | 17.0          |
| 724.0                   | 13.2          | 2483.5                  | 35.9          | 906.6                   | 16.9          | 541.5                   | 5.2           |
| 727.2                   | 9.1           | 2559.7                  | 42.8          | 928.7                   | 27.7          | 543.8                   | 13.1          |
| 731.0                   | 10.4          | 2619.9                  | 37.6          | 934.9                   | 12.0          | 548.0                   | 5.3           |
| 774.9                   | 20.0          | 2640.6                  | 30.7          | 937.1                   | 36.7          | 549.0                   | 10.0          |
| 775.3                   | 7.9           | 2666.5                  | 23.5          | 968.4                   | 14.4          | 549.5                   | 9.7           |
| 783.5                   | 25.2          | 2676.0                  | 30.0          | 975.1                   | 17.3          | 552.7                   | 7.0           |
| 784.9                   | 7.4           | 2847.7                  | 32.4          | 984.6                   | 9.1           | 553.4                   | 12.6          |
| 790.5                   | 13.6          | 2974.4                  | 140.5         | 1017.4                  | 21.8          | 559.0                   | 5.4           |
| 795.5                   | 7.5           | 3104.3                  | 33.0          | 1025.2                  | 32.9          | 562.1                   | 5.4           |
| 802.6                   | 35.0          | 3107.3                  | 15.9          | 1037.2                  | 31.1          | 565.0                   | 8.0           |
| 806.9                   | 46.6          | 3341.9                  | 27.5          | 1107.8                  | 43.0          | 566.2                   | 10.5          |
| 821.5                   | 7.9           | 3453.8                  | 46.4          | 1118.5                  | 20.0          | 571.2                   | 7.8           |
| 857.0                   | 17.5          | 419.6                   | 15.3          | 1147.2                  | 55.4          | 574.6                   | 14.3          |
| 869.2                   | 8.1           | 485.7                   | 6.0           | 1148.3                  | 31.9          | 578.6                   | 7.1           |
| 877.5                   | 8.2           | 490.0                   | 9.0           | 1156.5                  | 32.4          | 604.3                   | 5.8           |
| 898.6                   | 15.6          | 495.7                   | 5.9           | 1160.6                  | 20.0          | 615.5                   | 34.6          |
| 898.7                   | 20.0          | 496.3                   | 5.2           | 1178.6                  | 26.1          | 647.2                   | 11.0          |
| 914.1                   | 9.4           | 498.8                   | 7.3           | 1185.6                  | 40.5          | 664.6                   | 10.1          |
| 920.8                   | 10.5          | 500.6                   | 11.1          | 1188.0                  | 51.3          | 719.3                   | 6.8           |
| 923.0                   | 18.4          | 501.7                   | 6.2           | 1188.3                  | 26.5          | 726.1                   | 11.9          |
| 926.2                   | 14.8          | 503.6                   | 10.0          | 1193.6                  | 24.5          | 738.0                   | 67.7          |
| 937.2                   | 14.2          | 505.9                   | 8.1           | 1204.5                  | 22.7          | 758.0                   | 9.4           |
| 944.4                   | 12.2          | 510.2                   | 12.6          | 1205.0                  | 38.6          | 777.0                   | 24.2          |
| 969.6                   | 9.4           | 514.3                   | 6.4           | 1247.2                  | 27.6          | 819.2                   | 18.1          |
| 975.9                   | 15.8          | 514.3                   | 7.7           | 1334.6                  | 19.5          | 843.4                   | 11.6          |
| 992.9                   | 23.9          | 516.1                   | 12.0          | 1445.3                  | 62.3          | 847.8                   | 16.2          |
| 1007.2                  | 11.8          | 520.4                   | 7.9           | 1615.2                  | 29.3          | 854.4                   | 8.0           |
| 1012.9                  | 29.6          | 520.6                   | 5.2           | 1646.2                  | 21.2          | 855.7                   | 15.8          |
| 1015.4                  | 14.9          | 521.9                   | 9.5           | 2362.4                  | 18.9          | 864.5                   | 29.4          |
| 1018.0                  | 13.3          | 522.0                   | 31.2          | 2409.6                  | 53.4          | 868.8                   | 19.7          |
| 1034.3                  | 11.4          | 522.9                   | 9.6           | 2419.6                  | 18.7          | 882.2                   | 23.7          |
| 1043.0                  | 16.4          | 524.0                   | 10.8          | 2453.3                  | 16.9          | 905.6                   | 24.2          |
| 1045.6                  | 9.7           | 525.1                   | 8.2           | 2457.3                  | 23.8          | 920.8                   | 15.3          |
| 1056.9                  | 37.5          | 527.8                   | 11.7          | 2457.8                  | 19.1          | 930.1                   | 8.7           |
| 1094.4                  | 20.7          | 528.6                   | 11.1          | 2460.6                  | 16.9          | 935.6                   | 8.7           |
| 1117.4                  | 40.5          | 531.6                   | 12.4          | 2462.6                  | 28.7          | 948.0                   | 14.3          |
| 1125.9                  | 138.7         | 532.1                   | 5.3           | 2477.2                  | 17.2          | 967.2                   | 22.2          |
| 1144.0                  | 42.5          | 534.5                   | 12.8          | 2479.4                  | 18.2          | 974.0                   | 42.1          |
| 1201.5                  | 44.0          | 539.3                   | 6.1           | 2484.5                  | 16.9          | 975.5                   | 9.1           |
| 1215.0                  | 34.0          | 539.8                   | 10.6          | 2508.8                  | 16.8          | 983.4                   | 9.1           |
| 1261.5                  | 68.2          | 542.1                   | 11.0          | 2840.8                  | 16.3          | 1009.2                  | 9.3           |
| 1262.4                  | 32.3          | 542.3                   | 6.7           | 3043.1                  | 28.8          | 1023.9                  | 12.2          |
| 1284.2                  | 26.1          | 546.3                   | 8.1           | 3118.6                  | 15.9          | 1027.2                  | 12.1          |
| 1349.9                  | 29.5          | 549.8                   | 7.2           | 3136.7                  | 16.5          | 1040.0                  | 9.6           |
| 1350.0                  | 19.3          | 582.4                   | 5.6           | 3452.5                  | 17.8          | 1063.5                  | 13.9          |

| Zircon U-Pb Age<br>(Ma) | Error<br>(Ma) |
|-------------------------|---------------|-------------------------|---------------|-------------------------|---------------|-------------------------|---------------|
| 1144.3                  | 64.4          | 526.6                   | 18.3          | 1231.2                  | 48.1          | 1125.9                  | 10.3          |
| 1149.0                  | 60.2          | 528.1                   | 5.1           | 1364.9                  | 45.0          | 1160.5                  | 42.0          |
| 1163.0                  | 28.1          | 528.8                   | 16.6          | 1378.1                  | 97.4          | 1219.6                  | 27.3          |
| 1165.5                  | 43.8          | 532.1                   | 5.4           | 1615.0                  | 53.2          | 1315.6                  | 103.5         |
| 1167.4                  | 47.7          | 532.9                   | 11.8          | 1635.7                  | 27.3          | 1321.4                  | 36.0          |
| 1171.9                  | 32.9          | 537.7                   | 14.5          | 1638.6                  | 18.6          | 1342.3                  | 28.6          |
| 1183.9                  | 28.9          | 538.6                   | 19.0          | 1654.2                  | 20.4          | 1375.6                  | 127.8         |
| 1194.8                  | 27.4          | 542.0                   | 7.0           | 1728.4                  | 20.3          | 1407.1                  | 81.8          |
| 1200.9                  | 32.5          | 542.3                   | 9.2           | 1807.7                  | 69.6          | 1428.9                  | 43.9          |
| 1201.4                  | 56.2          | 543.5                   | 8.5           | 2242.0                  | 26.4          | 1496.3                  | 21.6          |
| 1209.1                  | 76.8          | 545.6                   | 11.1          | 2284.9                  | 96.5          | 1529.9                  | 31.8          |
| 1216.5                  | 38.2          | 546.8                   | 9.0           | 2423.7                  | 18.7          | 1558.1                  | 38.7          |
| 1252.9                  | 51.9          | 551.8                   | 18.9          | 2449.6                  | 32.7          | 1566.1                  | 36.0          |
| 1331.6                  | 33.7          | 553.6                   | 15.0          | 2469.0                  | 18.7          | 1570.4                  | 53.2          |
| 1393.4                  | 31.7          | 559.4                   | 9.1           | 2525.4                  | 19.0          | 1582.2                  | 47.3          |
| 1417.8                  | 19.1          | 559.5                   | 11.0          | 2629.1                  | 16.6          | 1584.5                  | 27.5          |
| 1491.7                  | 28.8          | 560.6                   | 5.4           | 2684.6                  | 16.5          | 1621.2                  | 47.8          |
| 1508.6                  | 73.7          | 569.1                   | 9.8           | 3047.3                  | 36.4          | 1691.8                  | 73.2          |
| 1616.9                  | 29.4          | 611.8                   | 10.5          | 502.2                   | 14.3          | 1730.5                  | 25.7          |
| 1622.0                  | 54.2          | 613.5                   | 10.5          | 506.7                   | 6.7           | 1759.4                  | 38.6          |
| 1661.1                  | 38.1          | 628.8                   | 6.6           | 511.7                   | 8.0           | 1761.9                  | 32.7          |
| 1661.2                  | 41.7          | 647.3                   | 6.2           | 526.2                   | 5.1           | 2046.6                  | 20.7          |
| 1664.6                  | 38.1          | 699.7                   | 6.6           | 589.7                   | 5.6           | 2102.0                  | 29.9          |
| 1672.5                  | 22.7          | 722.0                   | 10.2          | 599.8                   | 8.6           | 2139.4                  | 138.4         |
| 1683.6                  | 43.6          | 789.8                   | 13.8          | 664.1                   | 7.7           | 2203.5                  | 18.4          |
| 1687.1                  | 50.4          | 791.6                   | 18.7          | 771.2                   | 7.3           | 2284.3                  | 68.7          |
| 1716.7                  | 56.3          | 815.2                   | 13.2          | 784.9                   | 27.3          | 2330.7                  | 37.0          |
| 1730.4                  | 19.5          | 835.5                   | 21.2          | 787.8                   | 20.8          | 2410.0                  | 34.5          |
| 1750.7                  | 42.7          | 840.5                   | 8.5           | 787.8                   | 14.5          | 2410.5                  | 29.7          |
| 1754.7                  | 19.6          | 857.5                   | 8.8           | 827.1                   | 7.8           | 2420.3                  | 17.0          |
| 1795.0                  | 36.2          | 862.0                   | 12.9          | 855.3                   | 27.1          | 2443.0                  | 25.4          |
| 1810.0                  | 51.6          | 878.6                   | 10.7          | 874.7                   | 17.0          | 2451.1                  | 32.3          |
| 1878.5                  | 25.8          | 888.0                   | 8.4           | 887.4                   | 13.8          | 2508.0                  | 39.7          |
| 1892.1                  | 39.6          | 891.7                   | 13.8          | 907.3                   | 8.5           | 2524.5                  | 30.7          |
| 1966.5                  | 20.9          | 897.4                   | 8.4           | 914.1                   | 13.3          | 2524.8                  | 29.7          |
| 2108.6                  | 21.2          | 902.0                   | 11.4          | 929.5                   | 12.6          | 2540.2                  | 31.0          |
| 2254.3                  | 60.8          | 910.4                   | 11.9          | 945.6                   | 20.8          | 2544.0                  | 26.0          |
| 2461.2                  | 16.9          | 914.2                   | 14.4          | 947.2                   | 8.8           | 2544.4                  | 36.0          |
| 2483.9                  | 31.5          | 915.4                   | 10.8          | 951.9                   | 12.8          | 2545.7                  | 30.8          |
| 2540.2                  | 24.8          | 939.3                   | 22.1          | 953.2                   | 12.7          | 2561.8                  | 32.6          |
| 2557.6                  | 19.9          | 947.7                   | 15.9          | 954.5                   | 15.6          | 2644.1                  | 28.6          |
| 2962.7                  | 26.3          | 958.5                   | 20.3          | 954.9                   | 14.9          | 2666.2                  | 20.2          |
| 3001.8                  | 97.7          | 965.4                   | 22.0          | 959.4                   | 8.9           | 2667.1                  | 16.6          |
| 3375.8                  | 20.9          | 977.8                   | 17.8          | 966.1                   | 11.8          | 2690.0                  | 56.0          |
| 3440.2                  | 24.4          | 981.3                   | 9.1           | 966.6                   | 11.1          | 2735.8                  | 32.3          |
| 3662.8                  | 37.7          | 983.1                   | 13.7          | 970.0                   | 18.3          | 2745.7                  | 53.0          |
| 120.1                   | 3.4           | 989.8                   | 20.0          | 981.3                   | 22.5          | 2862.1                  | 36.1          |
| 124.0                   | 2.0           | 991.8                   | 16.3          | 981.7                   | 9.1           | 2955.4                  | 199.0         |
| 126.8                   | 1.4           | 992.8                   | 9.2           | 983.0                   | 13.5          | 3284.4                  | 17.4          |
| 128.7                   | 4.8           | 999.0                   | 29.2          | 987.5                   | 10.5          | 3327.7                  | 19.3          |
| 128.8                   | 2.3           | 1019.0                  | 11.9          | 991.8                   | 16.1          | 3420.2                  | 79.7          |
| 128.9                   | 3.7           | 1024.5                  | 10.3          | 992.4                   | 9.2           | 3636.8                  | 19.6          |
| 129.5                   | 1.5           | 1036.8                  | 21.5          | 996.8                   | 9.2           | 498.5                   | 12.8          |
| 129.6                   | 2.6           | 1042.5                  | 21.2          | 997.3                   | 10.4          | 503.9                   | 13.9          |
| 129.7                   | 3.4           | 1046.6                  | 12.4          | 1016.7                  | 23.4          | 507.0                   | 7.2           |
| 132.1                   | 4.6           | 1053.5                  | 27.4          | 1027.5                  | 9.5           | 507.6                   | 8.9           |
| 481.8                   | 6.4           | 1056.9                  | 12.1          | 1028.3                  | 10.6          | 523.9                   | 6.3           |
| 496.9                   | 6.9           | 1122.6                  | 31.1          | 1031.6                  | 21.2          | 530.4                   | 5.1           |
| 503.0                   | 14.4          | 1148.7                  | 25.4          | 1057.8                  | 9.8           | 533.2                   | 8.5           |
| 514.2                   | 6.9           | 1157.7                  | 38.9          | 1059.8                  | 29.8          | 537.8                   | 9.7           |
| 517.0                   | 5.5           | 1164.1                  | 44.0          | 1086.1                  | 17.8          | 540.5                   | 10.4          |
| 517.9                   | 13.0          | 1170.5                  | 30.5          | 1086.8                  | 23.4          | 543.9                   | 9.7           |
| 520.2                   | 12.2          | 1175.6                  | 56.8          | 1088.4                  | 23.7          | 544.2                   | 10.9          |
| 520.2                   | 6.2           | 1191.4                  | 60.7          | 1111.1                  | 19.7          | 544.6                   | 6.2           |
| 522.3                   | 7.2           | 1223.4                  | 41.7          | 1122.7                  | 10.3          | 545.9                   | 21.1          |

| Zircon U-Pb Age<br>(Ma) | Error<br>(Ma) |
|-------------------------|---------------|-------------------------|---------------|-------------------------|---------------|-------------------------|---------------|
| 546.2                   | 5.2           | 1760.4                  | 19.4          | 923.8                   | 22.3          | 3418.3                  | 24.6          |
| 551.9                   | 19.7          | 1761.5                  | 22.5          | 925.3                   | 29.9          | 3443.3                  | 17.4          |
| 554.7                   | 6.6           | 1773.0                  | 31.4          | 929.2                   | 23.6          | 3466.3                  | 15.5          |
| 564.3                   | 5.6           | 1773.8                  | 31.8          | 929.6                   | 19.0          | 476.0                   | 6.3           |
| 580.2                   | 11.4          | 1776.1                  | 58.4          | 935.5                   | 13.2          | 476.4                   | 8.8           |
| 586.9                   | 9.5           | 1777.5                  | 18.2          | 935.7                   | 18.4          | 478.4                   | 6.5           |
| 593.4                   | 15.8          | 1795.5                  | 24.0          | 938.0                   | 8.7           | 478.7                   | 13.3          |
| 606.5                   | 20.5          | 2275.5                  | 48.4          | 941.1                   | 18.3          | 481.9                   | 6.5           |
| 611.4                   | 8.2           | 2314.3                  | 22.8          | 941.5                   | 12.3          | 488.0                   | 11.6          |
| 613.5                   | 8.7           | 2409.6                  | 50.3          | 946.5                   | 25.4          | 493.1                   | 8.3           |
| 707.5                   | 11.6          | 2457.2                  | 22.7          | 954.0                   | 10.6          | 499.7                   | 6.8           |
| 718.6                   | 6.8           | 2462.8                  | 23.5          | 957.4                   | 21.4          | 501.0                   | 11.6          |
| 773.6                   | 10.5          | 2497.6                  | 19.7          | 958.6                   | 11.6          | 501.2                   | 4.8           |
| 791.9                   | 21.0          | 2500.4                  | 32.2          | 963.1                   | 17.4          | 507.7                   | 8.7           |
| 818.3                   | 24.8          | 2502.3                  | 25.2          | 966.6                   | 29.1          | 511.8                   | 6.3           |
| 829.1                   | 11.8          | 2524.3                  | 28.9          | 970.8                   | 11.3          | 515.8                   | 7.5           |
| 866.7                   | 32.0          | 2551.4                  | 28.8          | 972.3                   | 9.8           | 517.7                   | 8.2           |
| 867.4                   | 17.9          | 2560.6                  | 19.2          | 972.7                   | 14.4          | 520.5                   | 6.7           |
| 896.4                   | 14.4          | 2579.5                  | 24.2          | 976.3                   | 9.1           | 525.5                   | 5.0           |
| 898.9                   | 14.8          | 2745.3                  | 36.2          | 981.4                   | 10.7          | 526.6                   | 5.1           |
| 901.3                   | 18.3          | 2755.5                  | 20.5          | 990.2                   | 31.8          | 526.9                   | 8.6           |
| 911.7                   | 11.0          | 3448.0                  | 43.1          | 997.6                   | 9.2           | 531.1                   | 7.7           |
| 927.3                   | 18.5          | 424.8                   | 21.9          | 1005.5                  | 22.7          | 535.8                   | 5.1           |
| 928.9                   | 8.7           | 490.8                   | 11.5          | 1011.6                  | 9.4           | 537.7                   | 7.7           |
| 930.9                   | 14.7          | 512.4                   | 12.5          | 1034.3                  | 18.1          | 541.1                   | 5.2           |
| 937.7                   | 18.4          | 524.4                   | 11.3          | 1057.6                  | 16.5          | 544.1                   | 5.2           |
| 938.0                   | 12.4          | 524.6                   | 6.8           | 1081.4                  | 19.4          | 545.8                   | 5.2           |
| 939.9                   | 12.9          | 526.1                   | 10.0          | 1194.9                  | 33.5          | 555.7                   | 5.3           |
| 940.3                   | 16.5          | 533.0                   | 8.9           | 1201.4                  | 45.3          | 563.4                   | 8.5           |
| 943.0                   | 12.8          | 535.8                   | 7.4           | 1274.8                  | 92.4          | 584.5                   | 8.0           |
| 956.0                   | 10.0          | 538.4                   | 10.3          | 1329.8                  | 42.1          | 588.5                   | 10.5          |
| 957.9                   | 21.8          | 543.4                   | 11.5          | 1395.4                  | 51.8          | 613.4                   | 11.1          |
| 958.2                   | 13.2          | 548.9                   | 16.6          | 1420.1                  | 39.0          | 632.6                   | 6.0           |
| 970.7                   | 17.0          | 554.6                   | 5.3           | 1434.2                  | 80.7          | 643.3                   | 16.2          |
| 974.6                   | 9.0           | 557.6                   | 8.7           | 1440.7                  | 63.9          | 682.6                   | 12.2          |
| 978.5                   | 11.4          | 592.9                   | 14.8          | 1447.1                  | 47.3          | 692.8                   | 10.0          |
| 978.7                   | 13.6          | 604.2                   | 11.6          | 1453.6                  | 24.4          | 706.5                   | 13.0          |
| 980.2                   | 16.0          | 605.2                   | 10.7          | 1486.6                  | 67.1          | 724.6                   | 10.3          |
| 986.6                   | 10.8          | 614.2                   | 9.0           | 1585.8                  | 59.5          | 727.6                   | 10.0          |
| 989.5                   | 15.1          | 615.7                   | 11.9          | 1626.7                  | 23.4          | 731.9                   | 10.4          |
| 996.9                   | 22.4          | 622.8                   | 9.3           | 1640.4                  | 32.3          | 750.1                   | 7.7           |
| 1002.7                  | 16.2          | 626.3                   | 8.8           | 1645.4                  | 21.3          | 758.6                   | 7.2           |
| 1003.4                  | 9.3           | 627.7                   | 13.6          | 1794.1                  | 22.0          | 809.3                   | 13.2          |
| 1012.1                  | 12.1          | 629.5                   | 6.0           | 1834.5                  | 126.3         | 816.1                   | 19.0          |
| 1025.8                  | 18.8          | 653.8                   | 6.2           | 1904.7                  | 46.2          | 837.4                   | 11.2          |
| 1076.6                  | 31.3          | 655.3                   | 22.7          | 2185.4                  | 36.4          | 856.0                   | 17.9          |
| 1084.6                  | 45.1          | 728.9                   | 7.9           | 2328.3                  | 47.8          | 876.6                   | 12.4          |
| 1102.8                  | 26.8          | 734.2                   | 13.5          | 2358.9                  | 21.9          | 878.6                   | 22.8          |
| 1155.4                  | 38.7          | 754.3                   | 17.9          | 2377.7                  | 72.8          | 885.2                   | 11.5          |
| 1165.9                  | 36.5          | 761.6                   | 8.5           | 2380.1                  | 19.6          | 889.4                   | 14.8          |
| 1166.8                  | 55.7          | 764.7                   | 19.0          | 2396.2                  | 17.2          | 893.6                   | 13.9          |
| 1177.6                  | 39.0          | 772.6                   | 11.1          | 2440.9                  | 16.9          | 894.7                   | 20.1          |
| 1197.6                  | 98.7          | 776.6                   | 19.2          | 2451.5                  | 16.9          | 903.9                   | 9.8           |
| 1284.9                  | 27.7          | 778.7                   | 10.7          | 2454.0                  | 17.8          | 904.0                   | 8.4           |
| 1381.5                  | 27.1          | 792.8                   | 18.4          | 2460.9                  | 24.0          | 904.1                   | 21.8          |
| 1554.0                  | 33.8          | 793.4                   | 7.5           | 2468.8                  | 37.7          | 906.9                   | 19.7          |
| 1577.6                  | 237.7         | 839.8                   | 17.4          | 2472.3                  | 43.6          | 911.5                   | 17.0          |
| 1604.2                  | 26.7          | 863.3                   | 15.2          | 2484.0                  | 19.7          | 913.8                   | 22.4          |
| 1624.6                  | 26.4          | 869.5                   | 15.3          | 2484.5                  | 24.4          | 927.4                   | 20.2          |
| 1669.9                  | 32.2          | 878.1                   | 8.3           | 2495.1                  | 19.0          | 930.6                   | 12.5          |
| 1682.1                  | 75.2          | 895.9                   | 8.4           | 2495.4                  | 19.7          | 930.7                   | 16.9          |
| 1684.6                  | 52.2          | 897.4                   | 27.1          | 2560.0                  | 23.6          | 953.1                   | 8.9           |
| 1743.7                  | 32.3          | 915.0                   | 12.8          | 2799.7                  | 25.9          | 954.1                   | 27.8          |
| 1750.3                  | 30.6          | 916.0                   | 11.2          | 2800.4                  | 16.4          | 979.5                   | 9.1           |
| 1752.9                  | 21.8          | 917.5                   | 8.6           | 3204.8                  | 21.3          | 999.6                   | 24.7          |

| Zircon U-Pb Age<br>(Ma) | Error<br>(Ma) |
|-------------------------|---------------|-------------------------|---------------|-------------------------|---------------|-------------------------|---------------|
| 1021.9                  | 16.1          | 118.8                   | 3.9           | 2055.1                  | 72.8          | 1915.0                  | 41.1          |
| 1114.5                  | 39.0          | 119.0                   | 4.1           | 2110.8                  | 28.8          | 1915.0                  | 33.0          |
| 1185.1                  | 40.7          | 119.9                   | 3.8           | 2129.8                  | 99.0          | 1922.3                  | 64.2          |
| 1211.6                  | 21.5          | 120.1                   | 1.3           | 2143.7                  | 22.0          | 1927.3                  | 56.5          |
| 1220.3                  | 73.6          | 120.2                   | 6.7           | 2161.4                  | 43.3          | 1935.8                  | 35.4          |
| 1259.6                  | 43.4          | 120.2                   | 4.0           | 2238.1                  | 30.8          | 1936.5                  | 39.7          |
| 1271.7                  | 36.5          | 120.4                   | 2.0           | 2282.1                  | 27.0          | 1937.0                  | 17.9          |
| 1303.3                  | 60.7          | 120.4                   | 1.7           | 2324.9                  | 81.3          | 1948.1                  | 24.7          |
| 1314.1                  | 27.4          | 120.6                   | 4.1           | 2333.3                  | 26.0          | 1959.2                  | 27.8          |
| 1315.0                  | 56.1          | 120.7                   | 3.1           | 2353.5                  | 35.5          | 1960.7                  | 55.0          |
| 1325.0                  | 46.8          | 121.0                   | 4.5           | 2423.4                  | 26.1          | 1969.3                  | 38.2          |
| 1330.4                  | 120.6         | 121.4                   | 1.2           | 2443.6                  | 36.7          | 1974.7                  | 19.2          |
| 1336.5                  | 44.5          | 121.5                   | 3.3           | 2471.4                  | 27.7          | 1974.8                  | 23.7          |
| 1476.9                  | 44.4          | 121.8                   | 2.2           | 2476.7                  | 35.6          | 1977.5                  | 43.1          |
| 1656.9                  | 65.2          | 124.1                   | 2.9           | 2478.7                  | 21.4          | 2005.1                  | 33.6          |
| 1706.6                  | 35.6          | 124.2                   | 1.8           | 2481.9                  | 23.4          | 2010.5                  | 37.8          |
| 1719.7                  | 19.8          | 125.3                   | 3.1           | 2502.7                  | 54.0          | 2043.7                  | 54.3          |
| 1721.6                  | 32.2          | 126.4                   | 4.4           | 2509.6                  | 24.0          | 2057.2                  | 43.6          |
| 1725.5                  | 43.5          | 126.9                   | 1.3           | 2522.7                  | 16.8          | 2076.9                  | 46.0          |
| 1728.4                  | 18.4          | 1714.3                  | 64.4          | 2589.0                  | 47.7          | 2108.6                  | 44.0          |
| 1750.9                  | 44.7          | 1809.2                  | 18.9          | 2637.1                  | 35.9          | 2121.1                  | 76.8          |
| 1782.5                  | 53.1          | 1838.9                  | 44.6          | 2660.2                  | 22.0          | 2123.4                  | 29.3          |
| 1810.9                  | 28.4          | 1847.4                  | 27.9          | 2777.8                  | 46.1          | 2123.9                  | 60.8          |
| 1827.0                  | 18.1          | 1859.5                  | 27.8          | 2843.2                  | 30.6          | 2134.1                  | 56.0          |
| 1913.7                  | 29.8          | 1862.0                  | 31.4          | 2888.6                  | 30.8          | 2135.8                  | 25.0          |
| 2412.4                  | 26.8          | 1865.3                  | 29.2          | 2948.3                  | 60.6          | 2171.2                  | 41.5          |
| 2434.4                  | 31.7          | 1867.9                  | 33.9          | 3147.6                  | 28.4          | 2179.3                  | 35.5          |
| 2444.0                  | 24.7          | 1870.1                  | 27.4          | 109.9                   | 3.1           | 2203.2                  | 45.1          |
| 2458.3                  | 45.5          | 1875.3                  | 68.3          | 113.0                   | 3.7           | 2227.5                  | 56.3          |
| 2458.5                  | 16.9          | 1877.4                  | 25.4          | 115.7                   | 2.7           | 2288.6                  | 39.2          |
| 2460.6                  | 30.5          | 1882.9                  | 18.0          | 118.6                   | 2.3           | 2380.2                  | 48.4          |
| 2461.4                  | 27.0          | 1883.5                  | 33.9          | 119.3                   | 1.2           | 2397.6                  | 17.3          |
| 2472.9                  | 38.7          | 1885.4                  | 28.3          | 886.0                   | 22.4          | 2398.8                  | 31.1          |
| 2499.6                  | 16.8          | 1885.9                  | 29.2          | 1748.1                  | 60.3          | 2407.3                  | 27.9          |
| 2506.6                  | 31.1          | 1887.3                  | 27.0          | 1827.9                  | 43.2          | 2414.7                  | 34.0          |
| 2511.0                  | 40.0          | 1887.4                  | 22.7          | 1842.7                  | 30.2          | 2419.7                  | 41.2          |
| 2512.3                  | 39.0          | 1890.5                  | 32.6          | 1843.8                  | 36.9          | 2420.1                  | 67.2          |
| 2534.5                  | 43.6          | 1894.7                  | 22.3          | 1851.3                  | 51.2          | 2491.1                  | 16.9          |
| 2607.3                  | 41.4          | 1900.4                  | 25.3          | 1854.6                  | 37.4          | 2494.1                  | 35.4          |
| 2708.8                  | 18.3          | 1902.2                  | 19.2          | 1855.1                  | 28.2          | 2509.0                  | 23.4          |
| 2711.7                  | 29.7          | 1905.7                  | 40.8          | 1862.0                  | 41.5          | 2519.4                  | 37.0          |
| 2837.9                  | 16.3          | 1907.3                  | 19.8          | 1862.8                  | 45.1          | 2520.1                  | 48.6          |
| 3023.2                  | 34.2          | 1910.4                  | 61.4          | 1866.6                  | 29.6          | 2522.6                  | 18.6          |
| 3090.3                  | 18.2          | 1912.7                  | 25.1          | 1868.9                  | 55.9          | 2590.8                  | 28.7          |
| 3150.7                  | 26.4          | 1915.0                  | 19.4          | 1869.3                  | 46.0          | 2750.4                  | 28.3          |
| 3277.7                  | 28.1          | 1916.0                  | 42.3          | 1871.3                  | 41.5          | 3057.6                  | 54.7          |
| 3500.9                  | 27.2          | 1918.7                  | 21.2          | 1873.0                  | 47.1          | 3359.0                  | 30.5          |
| 110.4                   | 8.1           | 1920.7                  | 40.7          | 1873.5                  | 31.7          | 455.0                   | 4.0           |
| 111.0                   | 10.0          | 1922.6                  | 27.2          | 1874.4                  | 59.2          | 552.0                   | 5.0           |
| 111.5                   | 5.3           | 1930.9                  | 23.1          | 1875.6                  | 45.3          | 556.0                   | 6.0           |
| 111.6                   | 5.7           | 1933.6                  | 18.8          | 1877.9                  | 27.0          | 576.0                   | 6.0           |
| 111.8                   | 1.6           | 1947.1                  | 24.3          | 1879.4                  | 29.4          | 602.0                   | 8.0           |
| 112.8                   | 6.4           | 1948.2                  | 17.9          | 1880.4                  | 51.7          | 663.0                   | 7.0           |
| 113.4                   | 3.9           | 1964.7                  | 24.4          | 1880.9                  | 32.4          | 664.0                   | 7.0           |
| 114.0                   | 3.8           | 1970.5                  | 31.9          | 1881.2                  | 46.1          | 742.0                   | 8.0           |
| 114.5                   | 1.9           | 1970.8                  | 31.5          | 1881.6                  | 34.4          | 756.0                   | 8.0           |
| 115.0                   | 4.0           | 1972.0                  | 24.9          | 1882.5                  | 30.3          | 806.0                   | 9.0           |
| 116.7                   | 6.4           | 1973.4                  | 23.5          | 1885.5                  | 39.8          | 825.0                   | 8.0           |
| 117.2                   | 4.6           | 1973.5                  | 26.9          | 1887.7                  | 43.4          | 835.0                   | 18.0          |
| 117.2                   | 2.8           | 1992.0                  | 23.3          | 1892.9                  | 32.9          | 919.0                   | 9.0           |
| 117.8                   | 2.6           | 2000.0                  | 21.9          | 1894.1                  | 38.5          | 920.0                   | 12.0          |
| 118.1                   | 6.2           | 2008.7                  | 32.1          | 1899.6                  | 23.5          | 921.0                   | 9.0           |
| 118.4                   | 9.1           | 2021.2                  | 96.7          | 1903.0                  | 41.7          | 933.0                   | 9.0           |
| 118.4                   | 2.6           | 2034.7                  | 29.2          | 1904.0                  | 51.8          | 941.0                   | 10.0          |
| 118.8                   | 3.5           | 2053.9                  | 17.7          | 1909.2                  | 18.9          | 957.0                   | 14.0          |



| Zircon U-Pb Age<br>(Ma) | Error<br>(Ma) |
|-------------------------|---------------|-------------------------|---------------|-------------------------|---------------|-------------------------|---------------|
| 970.0                   | 13.0          | 936.0                   | 10.0          | 867.0                   | 11.0          | 1096.0                  | 20.0          |
| 974.0                   | 10.0          | 940.0                   | 12.0          | 870.0                   | 10.0          | 1121.0                  | 65.0          |
| 976.0                   | 9.0           | 941.0                   | 12.0          | 960.0                   | 11.0          | 1126.0                  | 25.0          |
| 982.0                   | 10.0          | 941.0                   | 10.0          | 1037.0                  | 20.0          | 1126.0                  | 74.0          |
| 989.0                   | 12.0          | 950.0                   | 12.0          | 1039.0                  | 177.0         | 1155.0                  | 281.0         |
| 994.0                   | 14.0          | 958.0                   | 9.0           | 1044.0                  | 33.0          | 1156.0                  | 83.0          |
| 997.0                   | 17.0          | 959.0                   | 11.0          | 1065.0                  | 51.0          | 1192.0                  | 54.0          |
| 998.0                   | 10.0          | 961.0                   | 10.0          | 1134.0                  | 39.0          | 1219.0                  | 21.0          |
| 1004.0                  | 24.0          | 962.0                   | 10.0          | 1146.0                  | 47.0          | 1373.0                  | 479.0         |
| 1004.0                  | 16.0          | 963.0                   | 9.0           | 1155.0                  | 29.0          | 1418.0                  | 104.0         |
| 1019.0                  | 11.0          | 966.0                   | 11.0          | 1160.0                  | 35.0          | 1427.0                  | 73.0          |
| 1040.0                  | 31.0          | 984.0                   | 10.0          | 1171.0                  | 25.0          | 1444.0                  | 17.0          |
| 1054.0                  | 16.0          | 985.0                   | 12.0          | 1181.0                  | 29.0          | 1493.0                  | 56.0          |
| 1061.0                  | 34.0          | 999.0                   | 10.0          | 1212.0                  | 29.0          | 1498.0                  | 95.0          |
| 1070.0                  | 23.0          | 1001.0                  | 12.0          | 1240.0                  | 14.0          | 1601.0                  | 20.0          |
| 1072.0                  | 33.0          | 1052.0                  | 50.0          | 1299.0                  | 310.0         | 1616.0                  | 12.0          |
| 1075.0                  | 43.0          | 1067.0                  | 65.0          | 1365.0                  | 26.0          | 1667.0                  | 32.0          |
| 1076.0                  | 13.0          | 1069.0                  | 11.0          | 1435.0                  | 33.0          | 1682.0                  | 26.0          |
| 1151.0                  | 11.0          | 1100.0                  | 8.0           | 1548.0                  | 15.0          | 1694.0                  | 10.0          |
| 1163.0                  | 24.0          | 1129.0                  | 51.0          | 1607.0                  | 23.0          | 1697.0                  | 36.0          |
| 1201.0                  | 55.0          | 1159.0                  | 10.0          | 1621.0                  | 23.0          | 1714.0                  | 23.0          |
| 1285.0                  | 46.0          | 1165.0                  | 20.0          | 1652.0                  | 31.0          | 1752.0                  | 19.0          |
| 1289.0                  | 14.0          | 1167.0                  | 45.0          | 1653.0                  | 133.0         | 1769.0                  | 24.0          |
| 1457.0                  | 19.0          | 1199.0                  | 42.0          | 1718.0                  | 15.0          | 1805.0                  | 17.0          |
| 1551.0                  | 42.0          | 1217.0                  | 17.0          | 1734.0                  | 13.0          | 1847.0                  | 66.0          |
| 1616.0                  | 21.0          | 1229.0                  | 18.0          | 1788.0                  | 20.0          | 1915.0                  | 14.0          |
| 1682.0                  | 6.0           | 1311.0                  | 79.0          | 1838.0                  | 97.0          | 2491.0                  | 20.0          |
| 1706.0                  | 13.0          | 1380.0                  | 22.0          | 1845.0                  | 6.0           | 2503.0                  | 26.0          |
| 1730.0                  | 11.0          | 1411.0                  | 23.0          | 1908.0                  | 148.0         | 2574.0                  | 31.0          |
| 1777.0                  | 9.0           | 1432.0                  | 13.0          | 1919.0                  | 18.0          | 474.0                   | 12.0          |
| 1966.0                  | 16.0          | 1447.0                  | 14.0          | 2175.0                  | 12.0          | 482.0                   | 6.0           |
| 1978.0                  | 14.0          | 1469.0                  | 13.0          | 2753.0                  | 6.0           | 487.0                   | 8.0           |
| 2212.0                  | 11.0          | 1491.0                  | 13.0          | 3147.0                  | 6.0           | 498.0                   | 7.0           |
| 2293.0                  | 37.0          | 1497.0                  | 17.0          | 3225.0                  | 6.0           | 501.0                   | 7.0           |
| 2339.0                  | 30.0          | 1587.0                  | 22.0          | 526.0                   | 6.0           | 507.0                   | 5.0           |
| 2361.0                  | 5.0           | 1630.0                  | 10.0          | 526.0                   | 7.0           | 507.0                   | 7.0           |
| 2461.0                  | 20.0          | 1880.0                  | 11.0          | 536.0                   | 9.0           | 543.0                   | 7.0           |
| 2462.0                  | 13.0          | 2425.0                  | 38.0          | 545.0                   | 11.0          | 571.0                   | 8.0           |
| 2470.0                  | 22.0          | 2432.0                  | 22.0          | 569.0                   | 6.0           | 578.0                   | 6.0           |
| 2486.0                  | 22.0          | 2469.0                  | 21.0          | 575.0                   | 7.0           | 578.0                   | 8.0           |
| 2500.0                  | 16.0          | 2469.0                  | 6.0           | 576.0                   | 14.0          | 585.0                   | 6.0           |
| 2517.0                  | 6.0           | 2478.0                  | 19.0          | 673.0                   | 9.0           | 635.0                   | 10.0          |
| 2585.0                  | 15.0          | 2527.0                  | 5.0           | 698.0                   | 14.0          | 666.0                   | 15.0          |
| 2628.0                  | 2.0           | 2549.0                  | 14.0          | 776.0                   | 9.0           | 717.0                   | 13.0          |
| 2876.0                  | 5.0           | 2552.0                  | 5.0           | 823.0                   | 12.0          | 739.0                   | 9.0           |
| 2969.0                  | 6.0           | 2555.0                  | 12.0          | 823.0                   | 13.0          | 745.0                   | 8.0           |
| 3463.0                  | 7.0           | 2564.0                  | 5.0           | 875.0                   | 10.0          | 758.0                   | 9.0           |
| 399.0                   | 4.0           | 2777.0                  | 13.0          | 883.0                   | 12.0          | 781.0                   | 12.0          |
| 447.0                   | 6.0           | 3167.0                  | 7.0           | 885.0                   | 9.0           | 801.0                   | 12.0          |
| 469.0                   | 5.0           | 424.0                   | 5.0           | 941.0                   | 10.0          | 896.0                   | 13.0          |
| 524.0                   | 7.0           | 484.0                   | 6.0           | 946.0                   | 10.0          | 901.0                   | 10.0          |
| 566.0                   | 6.0           | 532.0                   | 6.0           | 949.0                   | 11.0          | 1047.0                  | 53.0          |
| 593.0                   | 6.0           | 551.0                   | 9.0           | 954.0                   | 181.0         | 1054.0                  | 13.0          |
| 595.0                   | 6.0           | 575.0                   | 8.0           | 963.0                   | 10.0          | 1066.0                  | 14.0          |
| 614.0                   | 6.0           | 618.0                   | 7.0           | 968.0                   | 12.0          | 1067.0                  | 27.0          |
| 620.0                   | 6.0           | 623.0                   | 8.0           | 971.0                   | 11.0          | 1071.0                  | 48.0          |
| 626.0                   | 9.0           | 630.0                   | 7.0           | 971.0                   | 10.0          | 1093.0                  | 10.0          |
| 647.0                   | 7.0           | 657.0                   | 7.0           | 977.0                   | 11.0          | 1097.0                  | 36.0          |
| 739.0                   | 8.0           | 662.0                   | 9.0           | 999.0                   | 12.0          | 1104.0                  | 43.0          |
| 810.0                   | 8.0           | 707.0                   | 9.0           | 1004.0                  | 11.0          | 1115.0                  | 72.0          |
| 856.0                   | 9.0           | 747.0                   | 29.0          | 1024.0                  | 188.0         | 1127.0                  | 33.0          |
| 873.0                   | 9.0           | 764.0                   | 9.0           | 1027.0                  | 91.0          | 1176.0                  | 26.0          |
| 881.0                   | 8.0           | 770.0                   | 8.0           | 1044.0                  | 101.0         | 1182.0                  | 41.0          |
| 919.0                   | 10.0          | 783.0                   | 12.0          | 1062.0                  | 61.0          | 1184.0                  | 13.0          |
| 929.0                   | 10.0          | 827.0                   | 10.0          | 1078.0                  | 329.0         | 1198.0                  | 330.0         |

| Zircon U-Pb Age<br>(Ma) | Error<br>(Ma) |
|-------------------------|---------------|-------------------------|---------------|-------------------------|---------------|-------------------------|---------------|
| 1249.0                  | 27.0          | 1699.0                  | 13.0          | 976.0                   | 14.0          | 1372.0                  | 32.0          |
| 1250.0                  | 12.0          | 1701.0                  | 20.0          | 976.0                   | 12.0          | 1433.0                  | 51.0          |
| 1253.0                  | 40.0          | 1704.0                  | 15.0          | 978.0                   | 14.0          | 1438.0                  | 4.0           |
| 1282.0                  | 11.0          | 1736.0                  | 14.0          | 994.0                   | 67.0          | 1450.0                  | 4.0           |
| 1304.0                  | 41.0          | 1752.0                  | 30.0          | 996.0                   | 14.0          | 1467.0                  | 8.0           |
| 1346.0                  | 20.0          | 1752.0                  | 29.0          | 1067.0                  | 27.0          | 1520.0                  | 26.0          |
| 1348.0                  | 73.0          | 1763.0                  | 17.0          | 1070.0                  | 25.0          | 1567.0                  | 110.0         |
| 1387.0                  | 45.0          | 1766.0                  | 18.0          | 1129.0                  | 24.0          | 1598.0                  | 7.0           |
| 1400.0                  | 22.0          | 1766.0                  | 18.0          | 1543.0                  | 37.0          | 1633.0                  | 14.0          |
| 1426.0                  | 16.0          | 1772.0                  | 15.0          | 1825.0                  | 45.0          | 1655.0                  | 49.0          |
| 1429.0                  | 15.0          | 1794.0                  | 14.0          | 1881.0                  | 14.0          | 1719.0                  | 10.0          |
| 1500.0                  | 26.0          | 1801.0                  | 11.0          | 1978.0                  | 17.0          | 1723.0                  | 15.0          |
| 1532.0                  | 11.0          | 1808.0                  | 16.0          | 2176.0                  | 16.0          | 1723.0                  | 5.0           |
| 1582.0                  | 34.0          | 1843.0                  | 10.0          | 2196.0                  | 13.0          | 1742.0                  | 75.0          |
| 1655.0                  | 8.0           | 1880.0                  | 18.0          | 2432.0                  | 7.0           | 1771.0                  | 7.0           |
| 1818.0                  | 10.0          | 1918.0                  | 22.0          | 2498.0                  | 8.0           | 1834.0                  | 64.0          |
| 1837.0                  | 13.0          | 1925.0                  | 18.0          | 2500.0                  | 9.0           | 1862.0                  | 4.0           |
| 1900.0                  | 6.0           | 2020.0                  | 160.0         | 2512.0                  | 7.0           | 1960.0                  | 48.0          |
| 1926.0                  | 87.0          | 2075.0                  | 9.0           | 2512.0                  | 11.0          | 2453.0                  | 21.0          |
| 2235.0                  | 37.0          | 2113.0                  | 43.0          | 2522.0                  | 11.0          | 2464.0                  | 3.0           |
| 2385.0                  | 8.0           | 2231.0                  | 15.0          | 2529.0                  | 16.0          | 2476.0                  | 11.0          |
| 2483.0                  | 5.0           | 2310.0                  | 16.0          | 2540.0                  | 28.0          | 2643.0                  | 34.0          |
| 3123.0                  | 8.0           | 2449.0                  | 27.0          | 2583.0                  | 9.0           | 3246.0                  | 6.0           |
| 3267.0                  | 9.0           | 214.0                   | 3.0           | 3524.0                  | 5.0           | 836.7                   | 7.8           |
| 403.0                   | 6.0           | 524.0                   | 7.0           | 707.0                   | 15.0          | 851.3                   | 8.0           |
| 682.0                   | 12.0          | 532.0                   | 7.0           | 766.0                   | 10.0          | 875.1                   | 8.2           |
| 747.0                   | 9.0           | 542.0                   | 6.0           | 803.0                   | 8.0           | 878.8                   | 8.2           |
| 756.0                   | 9.0           | 547.0                   | 9.0           | 812.0                   | 8.0           | 903.4                   | 16.3          |
| 773.0                   | 14.0          | 548.0                   | 8.0           | 812.0                   | 9.0           | 906.9                   | 25.2          |
| 787.0                   | 9.0           | 553.0                   | 7.0           | 815.0                   | 9.0           | 908.6                   | 28.9          |
| 792.0                   | 19.0          | 559.0                   | 10.0          | 826.0                   | 9.0           | 911.0                   | 11.2          |
| 797.0                   | 10.0          | 561.0                   | 10.0          | 828.0                   | 9.0           | 912.3                   | 12.8          |
| 803.0                   | 10.0          | 563.0                   | 15.0          | 830.0                   | 10.0          | 917.9                   | 8.6           |
| 809.0                   | 10.0          | 592.0                   | 10.0          | 843.0                   | 9.0           | 919.2                   | 8.6           |
| 865.0                   | 11.0          | 594.0                   | 7.0           | 867.0                   | 9.0           | 919.9                   | 16.2          |
| 880.0                   | 12.0          | 596.0                   | 11.0          | 880.0                   | 9.0           | 928.0                   | 8.6           |
| 906.0                   | 12.0          | 597.0                   | 8.0           | 909.0                   | 9.0           | 928.6                   | 9.1           |
| 918.0                   | 12.0          | 621.0                   | 7.0           | 909.0                   | 9.0           | 941.6                   | 14.1          |
| 922.0                   | 10.0          | 641.0                   | 8.0           | 925.0                   | 9.0           | 944.4                   | 11.3          |
| 932.0                   | 12.0          | 663.0                   | 8.0           | 928.0                   | 11.0          | 950.8                   | 18.2          |
| 976.0                   | 10.0          | 674.0                   | 8.0           | 936.0                   | 9.0           | 951.0                   | 9.1           |
| 977.0                   | 12.0          | 683.0                   | 9.0           | 963.0                   | 10.0          | 951.5                   | 8.8           |
| 980.0                   | 28.0          | 685.0                   | 10.0          | 966.0                   | 11.0          | 954.9                   | 13.7          |
| 984.0                   | 10.0          | 691.0                   | 7.0           | 968.0                   | 9.0           | 966.6                   | 15.7          |
| 989.0                   | 10.0          | 751.0                   | 10.0          | 969.0                   | 99.0          | 974.6                   | 20.4          |
| 1081.0                  | 41.0          | 752.0                   | 9.0           | 969.0                   | 14.0          | 977.1                   | 42.2          |
| 1186.0                  | 22.0          | 753.0                   | 8.0           | 979.0                   | 9.0           | 977.2                   | 24.1          |
| 1275.0                  | 13.0          | 782.0                   | 13.0          | 980.0                   | 10.0          | 977.3                   | 45.7          |
| 1322.0                  | 28.0          | 791.0                   | 10.0          | 985.0                   | 30.0          | 978.7                   | 23.8          |
| 1357.0                  | 16.0          | 800.0                   | 9.0           | 996.0                   | 10.0          | 983.1                   | 61.1          |
| 1373.0                  | 45.0          | 804.0                   | 13.0          | 1005.0                  | 17.0          | 991.1                   | 76.1          |
| 1399.0                  | 44.0          | 814.0                   | 14.0          | 1041.0                  | 23.0          | 996.8                   | 35.4          |
| 1418.0                  | 24.0          | 820.0                   | 11.0          | 1058.0                  | 46.0          | 999.4                   | 68.9          |
| 1441.0                  | 9.0           | 826.0                   | 20.0          | 1066.0                  | 14.0          | 1000.0                  | 51.8          |
| 1500.0                  | 40.0          | 831.0                   | 10.0          | 1094.0                  | 14.0          | 1000.2                  | 35.5          |
| 1524.0                  | 18.0          | 844.0                   | 10.0          | 1135.0                  | 10.0          | 1004.3                  | 51.8          |
| 1555.0                  | 16.0          | 850.0                   | 12.0          | 1139.0                  | 26.0          | 1004.5                  | 46.7          |
| 1557.0                  | 106.0         | 869.0                   | 11.0          | 1153.0                  | 10.0          | 1006.2                  | 20.3          |
| 1559.0                  | 18.0          | 872.0                   | 15.0          | 1165.0                  | 63.0          | 1012.1                  | 20.3          |
| 1586.0                  | 11.0          | 909.0                   | 10.0          | 1168.0                  | 36.0          | 1014.5                  | 83.1          |
| 1595.0                  | 35.0          | 942.0                   | 12.0          | 1202.0                  | 15.0          | 1030.9                  | 52.2          |
| 1600.0                  | 17.0          | 944.0                   | 14.0          | 1205.0                  | 45.0          | 1038.8                  | 56.3          |
| 1626.0                  | 20.0          | 958.0                   | 17.0          | 1220.0                  | 18.0          | 1039.1                  | 68.9          |
| 1682.0                  | 18.0          | 963.0                   | 17.0          | 1238.0                  | 9.0           | 1089.9                  | 59.1          |
| 1697.0                  | 20.0          | 963.0                   | 11.0          | 1339.0                  | 32.0          | 1180.4                  | 30.1          |

| Zircon U-Pb Age<br>(Ma) | Error<br>(Ma) |
|-------------------------|---------------|-------------------------|---------------|-------------------------|---------------|-------------------------|---------------|
| 1220.7                  | 50.7          | 999.8                   | 48.6          | 1809.6                  | 25.1          | 1574.5                  | 35.0          |
| 1262.6                  | 41.2          | 1009.8                  | 27.2          | 1828.3                  | 49.7          | 1581.3                  | 48.5          |
| 1397.4                  | 257.9         | 1025.3                  | 84.8          | 1846.8                  | 33.8          | 1586.9                  | 51.7          |
| 1413.1                  | 65.4          | 1030.8                  | 81.3          | 1848.1                  | 50.4          | 1592.3                  | 62.4          |
| 1490.6                  | 35.1          | 1053.8                  | 52.0          | 1855.0                  | 26.6          | 1606.0                  | 23.6          |
| 1515.3                  | 47.8          | 1061.7                  | 67.4          | 1870.0                  | 61.2          | 1622.6                  | 37.8          |
| 1567.4                  | 29.8          | 1090.4                  | 39.7          | 1882.2                  | 49.6          | 1636.2                  | 72.4          |
| 1579.3                  | 29.2          | 1093.5                  | 79.6          | 1942.3                  | 55.8          | 1655.7                  | 26.1          |
| 1587.3                  | 20.9          | 1118.0                  | 78.6          | 1969.3                  | 56.5          | 1655.9                  | 43.8          |
| 1593.2                  | 36.8          | 1124.9                  | 62.4          | 2020.3                  | 58.3          | 1669.5                  | 57.2          |
| 1611.6                  | 42.9          | 1139.6                  | 81.0          | 2021.3                  | 56.9          | 1697.6                  | 54.2          |
| 1613.5                  | 18.6          | 1148.6                  | 35.8          | 2024.8                  | 68.0          | 1699.4                  | 25.1          |
| 1623.2                  | 62.7          | 1169.6                  | 47.7          | 2047.7                  | 91.4          | 1704.0                  | 47.7          |
| 1623.8                  | 21.8          | 1188.0                  | 48.0          | 2313.4                  | 48.2          | 1709.0                  | 48.2          |
| 1645.2                  | 20.8          | 1199.2                  | 42.4          | 2372.3                  | 54.1          | 1711.1                  | 26.7          |
| 1696.6                  | 19.9          | 1250.6                  | 33.3          | 2445.2                  | 49.1          | 1713.7                  | 54.5          |
| 1699.6                  | 21.7          | 1251.1                  | 34.8          | 2477.5                  | 31.9          | 1715.4                  | 63.3          |
| 1716.6                  | 27.8          | 1300.1                  | 47.4          | 2484.3                  | 63.4          | 1723.8                  | 44.1          |
| 1717.6                  | 21.9          | 1310.1                  | 51.2          | 3241.3                  | 35.6          | 1724.8                  | 48.3          |
| 1721.6                  | 18.4          | 1310.4                  | 87.2          | 951.4                   | 77.4          | 1732.9                  | 51.4          |
| 1737.0                  | 45.7          | 1332.1                  | 32.1          | 988.9                   | 46.3          | 1741.3                  | 91.5          |
| 1760.9                  | 24.0          | 1342.8                  | 90.5          | 1002.8                  | 38.2          | 1743.0                  | 34.3          |
| 1802.9                  | 30.9          | 1348.3                  | 32.5          | 1013.5                  | 74.5          | 1744.1                  | 44.5          |
| 1822.3                  | 62.6          | 1349.6                  | 45.6          | 1021.9                  | 87.3          | 1765.7                  | 45.1          |
| 1853.4                  | 52.2          | 1358.8                  | 60.7          | 1080.5                  | 48.5          | 1768.4                  | 26.6          |
| 1856.2                  | 24.4          | 1359.5                  | 34.3          | 1131.9                  | 24.7          | 1770.0                  | 45.7          |
| 1880.2                  | 77.9          | 1366.5                  | 32.4          | 1153.0                  | 69.5          | 1783.4                  | 18.3          |
| 1886.4                  | 54.4          | 1369.1                  | 34.1          | 1158.7                  | 48.4          | 1794.4                  | 50.3          |
| 1889.6                  | 18.0          | 1381.9                  | 134.8         | 1176.5                  | 66.3          | 1794.8                  | 28.4          |
| 1891.2                  | 76.2          | 1383.1                  | 42.3          | 1180.5                  | 24.2          | 1796.0                  | 22.5          |
| 1951.6                  | 30.4          | 1386.2                  | 62.9          | 1185.0                  | 27.9          | 1801.6                  | 23.8          |
| 2074.4                  | 53.0          | 1398.8                  | 26.3          | 1197.8                  | 53.0          | 1808.8                  | 32.2          |
| 2104.4                  | 34.4          | 1455.9                  | 69.4          | 1208.4                  | 45.3          | 1809.5                  | 46.2          |
| 2146.7                  | 96.9          | 1459.5                  | 53.2          | 1213.2                  | 44.2          | 1844.1                  | 52.1          |
| 2238.3                  | 74.8          | 1491.2                  | 36.8          | 1225.9                  | 80.2          | 1850.4                  | 65.5          |
| 2369.8                  | 32.2          | 1493.7                  | 110.8         | 1226.7                  | 39.1          | 1864.1                  | 26.4          |
| 2414.8                  | 18.3          | 1503.8                  | 54.4          | 1259.2                  | 77.4          | 1871.7                  | 38.4          |
| 2422.1                  | 51.6          | 1508.2                  | 38.0          | 1262.1                  | 48.7          | 1925.4                  | 50.7          |
| 2426.3                  | 34.1          | 1510.5                  | 60.8          | 1264.3                  | 53.5          | 1940.4                  | 31.0          |
| 2440.0                  | 51.7          | 1535.7                  | 86.4          | 1290.6                  | 59.6          | 1961.1                  | 102.5         |
| 2443.9                  | 26.1          | 1578.3                  | 34.2          | 1309.9                  | 43.3          | 1995.7                  | 61.3          |
| 2455.0                  | 16.9          | 1581.9                  | 88.9          | 1321.0                  | 49.2          | 2010.1                  | 40.5          |
| 2461.5                  | 42.8          | 1582.3                  | 114.2         | 1323.0                  | 42.3          | 2182.5                  | 30.3          |
| 2469.4                  | 22.1          | 1591.7                  | 106.2         | 1351.5                  | 62.2          | 2226.1                  | 38.6          |
| 2476.3                  | 43.0          | 1599.7                  | 76.2          | 1356.4                  | 68.5          | 2433.1                  | 79.9          |
| 2476.7                  | 16.9          | 1603.5                  | 18.7          | 1357.7                  | 41.7          | 2467.6                  | 59.1          |
| 2486.4                  | 43.0          | 1608.2                  | 44.8          | 1362.9                  | 37.4          | 2469.7                  | 47.5          |
| 2491.0                  | 16.9          | 1620.8                  | 74.1          | 1365.6                  | 54.4          | 2493.6                  | 38.9          |
| 2496.6                  | 63.7          | 1622.1                  | 97.0          | 1383.1                  | 41.5          | 2633.6                  | 41.0          |
| 2530.1                  | 37.4          | 1641.9                  | 83.6          | 1390.4                  | 74.3          | 2685.9                  | 23.3          |
| 2543.2                  | 28.8          | 1656.4                  | 35.2          | 1390.9                  | 30.2          | 2711.2                  | 29.9          |
| 2546.5                  | 20.4          | 1685.9                  | 76.5          | 1395.0                  | 58.1          | 3407.2                  | 40.6          |
| 2794.3                  | 28.0          | 1688.2                  | 57.0          | 1420.0                  | 48.4          | 282.0                   | 14.8          |
| 2812.1                  | 73.6          | 1703.3                  | 39.8          | 1421.5                  | 47.6          | 500.4                   | 20.6          |
| 2909.5                  | 51.9          | 1743.7                  | 77.7          | 1426.9                  | 72.4          | 501.8                   | 9.3           |
| 481.4                   | 14.0          | 1744.1                  | 67.3          | 1443.8                  | 31.1          | 511.8                   | 6.2           |
| 485.7                   | 11.9          | 1760.9                  | 34.0          | 1456.0                  | 64.1          | 514.4                   | 20.2          |
| 540.3                   | 47.4          | 1770.2                  | 56.8          | 1463.4                  | 76.8          | 516.3                   | 5.0           |
| 540.9                   | 32.2          | 1775.9                  | 41.1          | 1472.9                  | 19.0          | 519.6                   | 7.9           |
| 574.4                   | 22.8          | 1780.6                  | 43.6          | 1474.8                  | 54.3          | 520.7                   | 12.7          |
| 973.1                   | 53.9          | 1781.0                  | 59.7          | 1489.8                  | 37.7          | 526.3                   | 11.2          |
| 987.8                   | 22.3          | 1785.5                  | 37.4          | 1495.0                  | 25.6          | 526.6                   | 12.8          |
| 988.6                   | 89.2          | 1798.6                  | 43.7          | 1523.5                  | 56.4          | 536.0                   | 5.1           |
| 990.2                   | 78.1          | 1800.2                  | 52.8          | 1543.2                  | 38.0          | 537.2                   | 8.5           |
| 994.9                   | 65.2          | 1808.2                  | 44.5          | 1559.9                  | 29.5          | 554.9                   | 13.0          |

| Zircon U-Pb Age<br>(Ma) | Error<br>(Ma) |
|-------------------------|---------------|-------------------------|---------------|-------------------------|---------------|-------------------------|---------------|
| 596.9                   | 6.1           | 1745.7                  | 72.7          | 1107.0                  | 41.0          | 1225.0                  | 29.0          |
| 624.2                   | 13.9          | 1747.6                  | 40.3          | 1109.0                  | 26.0          | 1244.0                  | 31.0          |
| 666.2                   | 29.1          | 1884.2                  | 61.4          | 1112.0                  | 22.0          | 1294.0                  | 28.0          |
| 726.5                   | 15.8          | 1988.3                  | 39.3          | 1117.0                  | 32.0          | 1351.0                  | 48.0          |
| 788.4                   | 16.3          | 1988.6                  | 35.4          | 1125.0                  | 20.0          | 1392.0                  | 143.0         |
| 812.1                   | 7.6           | 2014.5                  | 28.9          | 1129.0                  | 18.0          | 1561.0                  | 21.0          |
| 826.0                   | 10.0          | 2050.8                  | 45.2          | 1132.0                  | 20.0          | 1755.0                  | 15.0          |
| 901.7                   | 34.9          | 2200.6                  | 60.5          | 1135.0                  | 21.0          | 1799.0                  | 24.0          |
| 929.4                   | 54.4          | 2289.0                  | 26.0          | 1142.0                  | 10.0          | 1832.0                  | 57.0          |
| 950.8                   | 36.9          | 2348.3                  | 37.4          | 1143.0                  | 20.0          | 2500.0                  | 8.0           |
| 960.0                   | 55.6          | 2412.1                  | 36.0          | 1144.0                  | 24.0          | 2520.0                  | 6.0           |
| 968.2                   | 60.7          | 2450.6                  | 48.6          | 1146.0                  | 7.0           | 2610.0                  | 5.0           |
| 972.2                   | 42.8          | 2506.2                  | 51.7          | 1147.0                  | 26.0          | 3037.0                  | 149.0         |
| 988.1                   | 62.1          | 2568.8                  | 30.9          | 1148.0                  | 20.0          | 3236.0                  | 5.0           |
| 988.3                   | 57.6          | 2623.7                  | 32.8          | 1162.0                  | 20.0          | 474.5                   | 14.7          |
| 1008.6                  | 59.3          | 2814.3                  | 27.1          | 1162.0                  | 37.0          | 490.2                   | 6.0           |
| 1015.0                  | 30.1          | 2867.0                  | 16.3          | 1171.0                  | 20.0          | 504.5                   | 17.3          |
| 1024.1                  | 44.8          | 621.0                   | 10.0          | 1171.0                  | 22.0          | 526.7                   | 9.1           |
| 1027.0                  | 34.3          | 630.0                   | 9.0           | 1171.0                  | 5.0           | 527.0                   | 10.0          |
| 1051.7                  | 33.0          | 653.0                   | 8.0           | 1174.0                  | 7.0           | 530.0                   | 8.1           |
| 1053.6                  | 35.3          | 663.0                   | 8.0           | 1203.0                  | 20.0          | 531.4                   | 6.6           |
| 1067.4                  | 69.8          | 683.0                   | 8.0           | 1234.0                  | 20.0          | 532.0                   | 13.0          |
| 1069.3                  | 24.9          | 709.0                   | 3.0           | 1241.0                  | 20.0          | 535.0                   | 9.0           |
| 1069.8                  | 74.1          | 718.0                   | 9.0           | 1258.0                  | 36.0          | 546.0                   | 7.0           |
| 1079.5                  | 75.1          | 720.0                   | 13.0          | 1271.0                  | 9.0           | 559.9                   | 2.6           |
| 1091.4                  | 34.5          | 756.0                   | 8.0           | 1273.0                  | 55.0          | 568.2                   | 22.5          |
| 1092.7                  | 54.7          | 759.0                   | 8.0           | 1282.0                  | 20.0          | 580.8                   | 7.6           |
| 1102.9                  | 34.0          | 767.0                   | 9.0           | 1296.0                  | 37.0          | 595.0                   | 25.0          |
| 1109.3                  | 75.5          | 808.0                   | 10.0          | 1345.0                  | 56.0          | 642.6                   | 15.3          |
| 1118.5                  | 38.5          | 864.3                   | 13.0          | 1370.0                  | 20.0          | 671.3                   | 7.1           |
| 1122.3                  | 76.6          | 897.7                   | 11.6          | 1379.0                  | 19.0          | 696.2                   | 3.2           |
| 1129.6                  | 49.1          | 905.0                   | 11.0          | 1395.0                  | 3.0           | 736.0                   | 11.5          |
| 1133.7                  | 51.0          | 907.0                   | 11.0          | 1402.0                  | 42.0          | 784.6                   | 24.0          |
| 1137.3                  | 38.2          | 916.0                   | 15.0          | 1452.0                  | 20.0          | 789.3                   | 5.9           |
| 1151.6                  | 19.9          | 922.4                   | 4.4           | 1574.0                  | 3.0           | 827.0                   | 13.0          |
| 1155.4                  | 44.5          | 927.0                   | 20.0          | 1625.0                  | 10.0          | 861.6                   | 16.3          |
| 1158.5                  | 43.3          | 947.2                   | 10.2          | 1694.0                  | 19.0          | 1065.0                  | 30.0          |
| 1183.6                  | 35.5          | 950.0                   | 11.0          | 1760.0                  | 24.0          | 1076.0                  | 54.0          |
| 1185.4                  | 59.6          | 968.0                   | 12.0          | 1832.0                  | 18.0          | 1078.0                  | 67.0          |
| 1205.2                  | 43.6          | 970.0                   | 15.0          | 1904.0                  | 3.0           | 1094.0                  | 26.0          |
| 1283.7                  | 34.3          | 972.0                   | 12.0          | 1969.0                  | 19.0          | 1097.0                  | 77.0          |
| 1287.9                  | 35.4          | 976.0                   | 13.0          | 1982.0                  | 18.0          | 1110.0                  | 11.0          |
| 1292.1                  | 48.1          | 981.9                   | 6.8           | 2361.0                  | 17.0          | 1114.0                  | 13.0          |
| 1297.4                  | 113.8         | 994.0                   | 37.0          | 2529.0                  | 17.0          | 1127.0                  | 10.0          |
| 1322.5                  | 73.1          | 1006.0                  | 23.0          | 2542.0                  | 17.0          | 1134.0                  | 28.0          |
| 1358.2                  | 41.8          | 1018.0                  | 20.0          | 2725.0                  | 17.0          | 1138.0                  | 22.0          |
| 1365.6                  | 43.5          | 1027.0                  | 20.0          | 2753.0                  | 16.0          | 1140.0                  | 16.0          |
| 1369.2                  | 37.9          | 1036.0                  | 19.0          | 3023.0                  | 18.0          | 1140.2                  | 45.6          |
| 1379.7                  | 43.3          | 1038.0                  | 21.0          | 3121.0                  | 16.0          | 1158.0                  | 69.0          |
| 1404.0                  | 41.0          | 1042.0                  | 23.0          | 498.0                   | 5.0           | 1160.0                  | 90.0          |
| 1408.4                  | 43.8          | 1043.0                  | 21.0          | 476.9                   | 9.4           | 1169.0                  | 3.0           |
| 1415.2                  | 83.6          | 1043.0                  | 8.0           | 642.6                   | 55.0          | 1176.0                  | 12.0          |
| 1545.3                  | 35.5          | 1045.0                  | 23.0          | 678.9                   | 8.6           | 1189.0                  | 33.0          |
| 1610.1                  | 36.8          | 1052.0                  | 20.0          | 730.9                   | 23.8          | 1196.0                  | 32.0          |
| 1689.9                  | 60.0          | 1054.0                  | 27.0          | 732.8                   | 20.5          | 1217.0                  | 21.0          |
| 1693.1                  | 59.4          | 1056.0                  | 20.0          | 746.0                   | 11.0          | 1225.0                  | 26.0          |
| 1702.4                  | 40.0          | 1057.0                  | 20.0          | 888.0                   | 32.0          | 1227.0                  | 59.0          |
| 1704.7                  | 30.6          | 1060.0                  | 57.0          | 857.3                   | 8.4           | 1234.0                  | 33.0          |
| 1706.6                  | 25.2          | 1063.0                  | 22.0          | 1046.0                  | 109.0         | 1234.0                  | 19.0          |
| 1717.2                  | 27.0          | 1063.0                  | 17.0          | 1081.0                  | 113.0         | 1239.0                  | 90.0          |
| 1730.3                  | 38.2          | 1063.0                  | 12.0          | 1103.0                  | 23.0          | 1259.0                  | 17.0          |
| 1732.9                  | 37.3          | 1067.0                  | 21.0          | 1114.0                  | 111.0         | 1285.0                  | 11.0          |
| 1734.7                  | 47.3          | 1069.0                  | 20.0          | 1143.0                  | 68.0          | 1288.0                  | 12.0          |
| 1739.4                  | 33.9          | 1077.0                  | 21.0          | 1152.0                  | 29.0          | 1291.0                  | 12.0          |
| 1740.5                  | 35.8          | 1089.0                  | 22.0          | 1192.0                  | 8.0           | 1312.0                  | 23.0          |

| Zircon U-Pb Age<br>(Ma) | Error<br>(Ma) |
|-------------------------|---------------|-------------------------|---------------|-------------------------|---------------|-------------------------|---------------|
| 1312.0                  | 27.0          | 1090.0                  | 35.0          | 419.0                   | 7.1           | 1053.0                  | 12.0          |
| 1330.0                  | 35.0          | 1090.0                  | 24.0          | 425.0                   | 2.8           | 1062.0                  | 32.0          |
| 1333.0                  | 16.0          | 1095.0                  | 68.0          | 775.0                   | 4.3           | 1064.0                  | 25.0          |
| 1346.0                  | 12.0          | 1101.0                  | 23.0          | 919.0                   | 5.8           | 1070.0                  | 6.0           |
| 1349.0                  | 29.0          | 1120.0                  | 23.0          | 924.0                   | 5.3           | 1077.0                  | 5.0           |
| 1392.0                  | 26.0          | 1124.0                  | 32.0          | 942.0                   | 4.9           | 1090.0                  | 19.0          |
| 1539.0                  | 27.0          | 1145.0                  | 24.0          | 867.0                   | 7.2           | 1109.0                  | 13.0          |
| 1618.0                  | 11.0          | 1150.0                  | 24.0          | 1134.0                  | 8.0           | 1116.0                  | 17.0          |
| 1681.0                  | 58.0          | 1153.0                  | 16.0          | 1468.0                  | 5.0           | 1120.0                  | 6.0           |
| 1685.0                  | 47.0          | 1154.0                  | 95.0          | 1632.0                  | 5.0           | 1152.0                  | 4.0           |
| 1731.0                  | 23.0          | 1155.0                  | 22.0          | 2172.0                  | 12.0          | 1160.0                  | 6.0           |
| 1732.0                  | 18.0          | 1223.0                  | 3.0           | 2701.0                  | 5.0           | 1161.0                  | 5.0           |
| 1763.0                  | 41.0          | 1225.0                  | 20.0          | 2856.0                  | 4.0           | 1170.0                  | 13.0          |
| 1776.0                  | 9.0           | 1226.0                  | 20.0          | 508.0                   | 11.2          | 1172.0                  | 19.0          |
| 1802.0                  | 39.0          | 1229.0                  | 32.0          | 504.0                   | 7.1           | 1174.0                  | 7.0           |
| 1895.0                  | 15.0          | 1275.0                  | 27.0          | 536.0                   | 3.4           | 1198.0                  | 18.0          |
| 1980.0                  | 14.0          | 1320.0                  | 38.0          | 845.0                   | 7.2           | 1205.0                  | 8.0           |
| 2019.0                  | 9.0           | 1433.0                  | 25.0          | 893.0                   | 7.3           | 1215.0                  | 7.0           |
| 2093.0                  | 20.0          | 1439.0                  | 6.0           | 932.0                   | 9.6           | 1216.0                  | 36.0          |
| 2104.0                  | 9.0           | 1447.0                  | 8.0           | 854.0                   | 4.4           | 1247.0                  | 23.0          |
| 2377.0                  | 12.0          | 1519.0                  | 37.0          | 943.0                   | 8.5           | 1251.0                  | 10.0          |
| 2429.0                  | 12.0          | 1534.0                  | 20.0          | 940.0                   | 4.7           | 1256.0                  | 7.0           |
| 2649.0                  | 3.0           | 1537.0                  | 23.0          | 951.0                   | 4.4           | 1287.0                  | 8.0           |
| 2654.0                  | 14.0          | 1628.0                  | 19.0          | 957.0                   | 5.8           | 1297.0                  | 6.0           |
| 2769.0                  | 9.0           | 1629.0                  | 23.0          | 1041.0                  | 11.0          | 1305.0                  | 32.0          |
| 2843.0                  | 18.0          | 1671.0                  | 3.0           | 1104.0                  | 5.0           | 1360.0                  | 35.0          |
| 2853.0                  | 11.0          | 1720.0                  | 19.0          | 1578.0                  | 5.0           | 1372.0                  | 21.0          |
| 2944.0                  | 5.0           | 1734.0                  | 20.0          | 1592.0                  | 4.0           | 1380.0                  | 22.0          |
| 496.8                   | 5.7           | 1768.0                  | 19.0          | 1734.0                  | 8.0           | 1400.0                  | 12.0          |
| 497.4                   | 4.5           | 1784.0                  | 21.0          | 1772.0                  | 10.0          | 1423.0                  | 12.0          |
| 516.0                   | 12.0          | 1800.0                  | 19.0          | 2414.0                  | 5.0           | 1581.0                  | 12.0          |
| 518.8                   | 6.0           | 1801.0                  | 25.0          | 2463.0                  | 4.0           | 1631.0                  | 7.0           |
| 569.0                   | 6.0           | 2082.0                  | 28.0          | 2493.0                  | 3.0           | 1664.0                  | 12.0          |
| 596.0                   | 18.0          | 2105.0                  | 18.0          | 2509.0                  | 4.0           | 1706.0                  | 12.0          |
| 609.0                   | 8.0           | 2171.0                  | 18.0          | 2544.0                  | 5.0           | 1731.0                  | 7.0           |
| 620.0                   | 14.0          | 2270.0                  | 18.0          | 489.0                   | 4.0           | 1756.0                  | 10.0          |
| 625.8                   | 5.3           | 2345.0                  | 18.0          | 491.0                   | 5.0           | 1775.0                  | 8.0           |
| 632.3                   | 13.4          | 2467.0                  | 17.0          | 498.0                   | 6.0           | 1783.0                  | 8.0           |
| 773.0                   | 29.0          | 2504.0                  | 20.0          | 536.0                   | 4.0           | 2013.0                  | 9.0           |
| 780.0                   | 18.0          | 2507.0                  | 17.0          | 568.0                   | 6.0           | 2226.0                  | 10.0          |
| 800.0                   | 9.0           | 2522.0                  | 18.0          | 654.0                   | 5.0           | 2454.0                  | 5.0           |
| 820.6                   | 6.8           | 2530.0                  | 18.0          | 659.0                   | 5.0           | 2465.0                  | 8.0           |
| 823.0                   | 15.0          | 2534.0                  | 17.0          | 669.0                   | 6.0           | 2503.0                  | 6.0           |
| 835.0                   | 9.5           | 2543.0                  | 17.0          | 752.0                   | 4.0           | 2506.0                  | 7.0           |
| 839.0                   | 9.0           | 2597.0                  | 17.0          | 772.0                   | 4.0           | 2511.0                  | 8.0           |
| 846.0                   | 12.0          | 2597.0                  | 4.0           | 799.0                   | 5.0           | 2515.0                  | 11.0          |
| 861.0                   | 12.0          | 2601.0                  | 24.0          | 806.0                   | 5.0           | 2545.0                  | 24.0          |
| 869.0                   | 10.0          | 2626.0                  | 17.0          | 815.0                   | 4.0           | 2562.0                  | 5.0           |
| 874.0                   | 12.0          | 2632.0                  | 29.0          | 835.0                   | 4.0           | 2563.0                  | 6.0           |
| 879.0                   | 7.5           | 2652.0                  | 17.0          | 837.0                   | 4.0           | 2575.0                  | 6.0           |
| 908.0                   | 35.0          | 2680.0                  | 17.0          | 846.0                   | 8.0           | 2585.0                  | 8.0           |
| 937.0                   | 14.0          | 2686.0                  | 6.0           | 877.0                   | 17.0          | 2588.0                  | 5.0           |
| 972.0                   | 44.0          | 2703.0                  | 1.0           | 887.0                   | 8.0           | 2607.0                  | 7.0           |
| 973.0                   | 13.0          | 2725.0                  | 16.0          | 895.0                   | 6.0           | 2607.0                  | 14.0          |
| 985.0                   | 16.0          | 2737.0                  | 17.0          | 919.0                   | 9.0           | 2625.0                  | 22.0          |
| 1005.0                  | 52.0          | 2828.0                  | 37.0          | 921.0                   | 6.0           | 2632.0                  | 3.0           |
| 1010.0                  | 16.0          | 2830.0                  | 16.0          | 932.0                   | 5.0           | 2653.0                  | 7.0           |
| 1010.0                  | 20.0          | 2877.0                  | 16.0          | 935.0                   | 11.0          | 2668.0                  | 6.0           |
| 1030.0                  | 88.0          | 2953.0                  | 16.0          | 935.0                   | 9.0           | 2685.0                  | 4.0           |
| 1056.0                  | 86.0          | 3103.0                  | 19.0          | 939.0                   | 8.0           | 2687.0                  | 8.0           |
| 1058.0                  | 26.0          | 3311.0                  | 16.0          | 1027.0                  | 5.0           | 2706.0                  | 7.0           |
| 1071.0                  | 21.0          | 3538.0                  | 16.0          | 1042.0                  | 8.0           | 2741.0                  | 5.0           |
| 1079.0                  | 29.0          | 3785.0                  | 15.0          | 1042.0                  | 10.0          | 2772.0                  | 6.0           |
| 1087.0                  | 20.0          | DeCelles et al., 2000   |               | 1045.0                  | 5.0           | 2836.0                  | 17.0          |
| 1088.0                  | 12.0          | 497.0                   | 3.0           | 1052.0                  | 8.0           | 2970.0                  | 5.0           |

| Zircon U-Pb Age<br>(Ma) | Error<br>(Ma) |
|-------------------------|---------------|-------------------------|---------------|-------------------------|---------------|-------------------------|---------------|
| 3755.0                  | 5.0           | 1621.0                  | 4.0           | 1020.0                  | 12.0          | 3372.0                  | 6.0           |
| 4042.0                  | 6.0           | 1657.0                  | 8.0           | 1031.0                  | 6.0           | 525.0                   | 8.0           |
| 489.0                   | 13.0          | 1663.0                  | 7.0           | 1039.0                  | 4.0           | 537.0                   | 14.0          |
| 495.0                   | 6.0           | 1664.0                  | 8.0           | 1052.0                  | 18.0          | 542.0                   | 9.0           |
| 496.0                   | 9.0           | 1674.0                  | 18.0          | 1060.0                  | 5.0           | 542.0                   | 15.0          |
| 499.0                   | 5.0           | 1733.0                  | 21.0          | 1061.0                  | 4.0           | 550.0                   | 8.0           |
| 529.0                   | 5.0           | 1757.0                  | 8.0           | 1063.0                  | 7.0           | 552.0                   | 6.0           |
| 568.0                   | 5.0           | 1772.0                  | 7.0           | 1070.0                  | 11.0          | 560.0                   | 19.0          |
| 584.0                   | 4.0           | 1784.0                  | 5.0           | 1071.0                  | 7.0           | 561.0                   | 13.0          |
| 589.0                   | 24.0          | 2154.0                  | 18.0          | 1071.0                  | 10.0          | 563.0                   | 13.0          |
| 611.0                   | 6.0           | 2218.0                  | 6.0           | 1078.0                  | 4.0           | 585.0                   | 6.0           |
| 615.0                   | 6.0           | 2361.0                  | 5.0           | 1112.0                  | 7.0           | 590.0                   | 14.0          |
| 637.0                   | 6.0           | 2484.0                  | 5.0           | 1117.0                  | 9.0           | 594.0                   | 9.0           |
| 657.0                   | 6.0           | 2497.0                  | 6.0           | 1132.0                  | 34.0          | 599.0                   | 21.0          |
| 658.0                   | 6.0           | 2511.0                  | 3.0           | 1159.0                  | 16.0          | 620.0                   | 6.0           |
| 691.0                   | 15.0          | 2530.0                  | 14.0          | 1168.0                  | 3.0           | 644.0                   | 14.0          |
| 692.0                   | 7.0           | 2536.0                  | 8.0           | 1235.0                  | 8.0           | 662.0                   | 12.0          |
| 702.0                   | 5.0           | 2549.0                  | 5.0           | 1352.0                  | 5.0           | 674.0                   | 6.0           |
| 714.0                   | 10.0          | 2557.0                  | 6.0           | 1365.0                  | 18.0          | 684.0                   | 15.0          |
| 834.0                   | 4.0           | 2603.0                  | 5.0           | 1376.0                  | 20.0          | 686.0                   | 8.0           |
| 835.0                   | 47.0          | 2620.0                  | 7.0           | 1459.0                  | 14.0          | 691.0                   | 4.0           |
| 838.0                   | 9.0           | 2623.0                  | 6.0           | 1553.0                  | 6.0           | 749.0                   | 9.0           |
| 846.0                   | 7.0           | 2700.0                  | 6.0           | 1591.0                  | 3.0           | 752.0                   | 10.0          |
| 880.0                   | 12.0          | 2713.0                  | 5.0           | 1593.0                  | 4.0           | 754.0                   | 5.0           |
| 928.0                   | 4.0           | 2726.0                  | 15.0          | 1611.0                  | 5.0           | 785.0                   | 16.0          |
| 974.0                   | 6.0           | 2788.0                  | 5.0           | 1612.0                  | 6.0           | 789.0                   | 14.0          |
| 976.0                   | 5.0           | 2825.0                  | 6.0           | 1644.0                  | 4.0           | 797.0                   | 14.0          |
| 1007.0                  | 4.0           | 2839.0                  | 8.0           | 1700.0                  | 10.0          | 800.0                   | 7.0           |
| 1017.0                  | 7.0           | 2915.0                  | 7.0           | 1708.0                  | 5.0           | 812.0                   | 14.0          |
| 1032.0                  | 5.0           | 3037.0                  | 8.0           | 1714.0                  | 5.0           | 822.0                   | 17.0          |
| 1035.0                  | 5.0           | 3227.0                  | 6.0           | 1757.0                  | 4.0           | 825.0                   | 19.0          |
| 1041.0                  | 12.0          | 3235.0                  | 5.0           | 1798.0                  | 6.0           | 841.0                   | 17.0          |
| 1045.0                  | 90.0          | 3285.0                  | 6.0           | 1835.0                  | 16.0          | 841.0                   | 13.0          |
| 1047.0                  | 11.0          | 3472.0                  | 4.0           | 1862.0                  | 4.0           | 843.0                   | 7.0           |
| 1049.0                  | 13.0          | 3507.0                  | 4.0           | 1878.0                  | 9.0           | 864.0                   | 16.0          |
| 1053.0                  | 4.0           | 496.0                   | 4.0           | 1920.0                  | 5.0           | 869.0                   | 14.0          |
| 1081.0                  | 27.0          | 497.0                   | 6.0           | 1948.0                  | 4.0           | 906.0                   | 9.0           |
| 1084.0                  | 36.0          | 506.0                   | 5.0           | 2134.0                  | 5.0           | 910.0                   | 11.0          |
| 1087.0                  | 5.0           | 516.0                   | 4.0           | 2217.0                  | 3.0           | 941.0                   | 20.0          |
| 1088.0                  | 17.0          | 535.0                   | 8.0           | 2390.0                  | 4.0           | 953.0                   | 23.0          |
| 1088.0                  | 18.0          | 652.0                   | 6.0           | 2462.0                  | 3.0           | 959.0                   | 19.0          |
| 1098.0                  | 6.0           | 669.0                   | 4.0           | 2510.0                  | 5.0           | 962.0                   | 8.0           |
| 1101.0                  | 26.0          | 695.0                   | 3.0           | 2535.0                  | 3.0           | 969.0                   | 16.0          |
| 1117.0                  | 5.0           | 762.0                   | 10.0          | 2558.0                  | 4.0           | 969.0                   | 19.0          |
| 1119.0                  | 12.0          | 770.0                   | 5.0           | 2570.0                  | 3.0           | 977.0                   | 18.0          |
| 1125.0                  | 25.0          | 773.0                   | 9.0           | 2570.0                  | 5.0           | 979.0                   | 12.0          |
| 1130.0                  | 5.0           | 785.0                   | 7.0           | 2572.0                  | 5.0           | 993.0                   | 16.0          |
| 1131.0                  | 6.0           | 812.0                   | 4.0           | 2574.0                  | 2.0           | 999.0                   | 22.0          |
| 1132.0                  | 4.0           | 814.0                   | 5.0           | 2576.0                  | 6.0           | 1052.0                  | 9.0           |
| 1136.0                  | 4.0           | 838.0                   | 5.0           | 2587.0                  | 8.0           | 1082.0                  | 18.0          |
| 1150.0                  | 5.0           | 842.0                   | 11.0          | 2587.0                  | 5.0           | 1136.0                  | 16.0          |
| 1159.0                  | 6.0           | 849.0                   | 9.0           | 2596.0                  | 4.0           | 1528.0                  | 82.0          |
| 1159.0                  | 4.0           | 904.0                   | 10.0          | 2599.0                  | 6.0           | 1750.0                  | 95.0          |
| 1165.0                  | 12.0          | 908.0                   | 4.0           | 2607.0                  | 5.0           | 1882.0                  | 15.0          |
| 1168.0                  | 8.0           | 914.0                   | 7.0           | 2615.0                  | 5.0           | 1976.0                  | 22.0          |
| 1179.0                  | 8.0           | 917.0                   | 16.0          | 2644.0                  | 7.0           | 2156.0                  | 36.0          |
| 1237.0                  | 6.0           | 947.0                   | 8.0           | 2696.0                  | 5.0           | 2201.0                  | 17.0          |
| 1346.0                  | 9.0           | 950.0                   | 6.0           | 2698.0                  | 6.0           | 2435.0                  | 9.0           |
| 1373.0                  | 7.0           | 951.0                   | 11.0          | 2731.0                  | 6.0           | 2498.0                  | 7.0           |
| 1375.0                  | 20.0          | 953.0                   | 8.0           | 2746.0                  | 5.0           | 2502.0                  | 12.0          |
| 1471.0                  | 25.0          | 955.0                   | 10.0          | 2760.0                  | 6.0           | 2510.0                  | 12.0          |
| 1480.0                  | 4.0           | 978.0                   | 6.0           | 2760.0                  | 5.0           | 2518.0                  | 13.0          |
| 1511.0                  | 6.0           | 989.0                   | 49.0          | 2812.0                  | 6.0           | 2523.0                  | 9.0           |
| 1535.0                  | 6.0           | 998.0                   | 5.0           | 2916.0                  | 5.0           | 2543.0                  | 16.0          |
| 1596.0                  | 5.0           | 1004.0                  | 9.0           | 3310.0                  | 7.0           | 2564.0                  | 26.0          |

| Zircon U-Pb Age<br>(Ma) | Error<br>(Ma) |
|-------------------------|---------------|-------------------------|---------------|-------------------------|---------------|-------------------------|---------------|
| 2581.0                  | 11.0          | 2424.0                  | 6.0           | 2125.0                  | 1.0           | 1813.0                  | 3.0           |
| 2635.0                  | 7.0           | 2424.0                  | 17.0          | 2139.0                  | 11.0          | 1829.0                  | 8.0           |
| 3526.0                  | 7.0           | 2442.0                  | 2.0           | 2152.0                  | 9.0           | 1841.0                  | 2.0           |
| 122.8                   | 6.4           | 2445.0                  | 1.0           | 2176.0                  | 3.0           | 1845.0                  | 6.0           |
| 124.5                   | 1.1           | 2487.0                  | 3.0           | 2178.0                  | 4.0           | 1846.0                  | 18.0          |
| 129.2                   | 2.7           | 2507.0                  | 3.0           | 2237.0                  | 15.0          | 1866.0                  | 4.0           |
| 131.2                   | 2.8           | 2551.0                  | 3.0           | 2321.0                  | 15.0          | 1877.0                  | 2.0           |
| 139.5                   | 1.5           | 2621.0                  | 3.0           | 2329.0                  | 11.0          | 1879.0                  | 3.0           |
| 153.7                   | 5.2           | 2628.0                  | 1.0           | 2334.0                  | 3.0           | 1881.0                  | 4.0           |
| 221.2                   | 7.6           | 2689.0                  | 44.0          | 2349.0                  | 17.0          | 1883.0                  | 2.0           |
| 250.9                   | 11.7          | 2746.0                  | 9.0           | 2356.0                  | 2.0           | 1886.0                  | 2.0           |
| 257.1                   | 12.2          | 2782.0                  | 1.0           | 2357.0                  | 2.0           | 1887.0                  | 6.0           |
| 275.9                   | 14.7          | 2802.0                  | 43.0          | 2369.0                  | 5.0           | 1888.0                  | 4.0           |
| 278.0                   | 20.0          | 2871.0                  | 2.0           | 2371.0                  | 3.0           | 1892.0                  | 2.0           |
| 287.9                   | 17.6          | 2928.0                  | 1.0           | 2390.0                  | 3.0           | 1896.0                  | 3.0           |
| 297.1                   | 12.7          | 3114.0                  | 3.0           | 2391.0                  | 1.0           | 1901.0                  | 4.0           |
| 312.1                   | 10.4          | 564.5                   | 16.1          | 2398.0                  | 5.0           | 1902.0                  | 3.0           |
| 369.2                   | 19.4          | 646.1                   | 10.5          | 2508.0                  | 4.0           | 1905.0                  | 8.0           |
| 387.9                   | 37.3          | 681.4                   | 6.1           | 2517.0                  | 3.0           | 1906.0                  | 3.0           |
| 421.3                   | 46.4          | 682.9                   | 13.9          | 2522.0                  | 9.0           | 1908.0                  | 5.0           |
| 538.9                   | 3.4           | 761.4                   | 10.0          | 2525.0                  | 4.0           | 1915.0                  | 2.0           |
| 646.5                   | 62.4          | 782.7                   | 19.0          | 2532.0                  | 3.0           | 1921.0                  | 3.0           |
| 722.1                   | 86.0          | 788.8                   | 8.6           | 2545.0                  | 3.0           | 1925.0                  | 4.0           |
| 744.1                   | 21.7          | 835.9                   | 41.9          | 2548.0                  | 1.0           | 1928.0                  | 9.0           |
| 1543.0                  | 8.0           | 870.5                   | 10.3          | 2548.0                  | 3.0           | 1934.0                  | 3.0           |
| 1556.0                  | 3.0           | 907.9                   | 20.9          | 2558.0                  | 1.0           | 1935.0                  | 5.0           |
| 1792.0                  | 6.0           | 915.1                   | 12.4          | 2561.0                  | 3.0           | 1937.0                  | 7.0           |
| 1930.0                  | 13.0          | 1501.0                  | 19.0          | 2565.0                  | 2.0           | 1941.0                  | 5.0           |
| 1942.0                  | 8.0           | 1829.0                  | 3.0           | 2569.0                  | 1.0           | 1949.0                  | 6.0           |
| 1955.0                  | 2.0           | 1831.0                  | 2.0           | 2569.0                  | 1.0           | 1953.0                  | 6.0           |
| 1958.0                  | 5.0           | 1837.0                  | 2.0           | 2573.0                  | 3.0           | 1972.0                  | 4.0           |
| 1970.0                  | 2.0           | 1845.0                  | 2.0           | 2576.0                  | 2.0           | 1984.0                  | 2.0           |
| 1971.0                  | 1.0           | 1852.0                  | 3.0           | 2577.0                  | 2.0           | 2002.0                  | 3.0           |
| 1972.0                  | 3.0           | 1862.0                  | 3.0           | 2596.0                  | 3.0           | 2034.0                  | 11.0          |
| 1979.0                  | 3.0           | 1911.0                  | 1.0           | 2673.0                  | 2.0           | 2045.0                  | 6.0           |
| 1980.0                  | 1.0           | 1920.0                  | 2.0           | 2697.0                  | 2.0           | 2077.0                  | 2.0           |
| 1981.0                  | 4.0           | 1924.0                  | 8.0           | 2714.0                  | 4.0           | 2130.0                  | 7.0           |
| 1982.0                  | 1.0           | 1939.0                  | 5.0           | 2719.0                  | 3.0           | 2154.0                  | 18.0          |
| 1984.0                  | 1.0           | 1940.0                  | 3.0           | 2730.0                  | 4.0           | 2154.0                  | 4.0           |
| 1993.0                  | 4.0           | 1941.0                  | 2.0           | 2896.0                  | 7.0           | 2165.0                  | 3.0           |
| 1997.0                  | 1.0           | 1944.0                  | 2.0           | 2903.0                  | 7.0           | 2204.0                  | 4.0           |
| 2006.0                  | 4.0           | 1944.0                  | 3.0           | 3004.0                  | 2.0           | 2208.0                  | 6.0           |
| 2009.0                  | 3.0           | 1944.0                  | 2.0           | 3046.0                  | 1.0           | 2233.0                  | 4.0           |
| 2010.0                  | 3.0           | 1946.0                  | 2.0           | 3101.0                  | 6.0           | 2262.0                  | 4.0           |
| 2012.0                  | 3.0           | 1950.0                  | 2.0           | 3302.0                  | 2.0           | 2286.0                  | 2.0           |
| 2019.0                  | 1.0           | 1950.0                  | 4.0           | 3753.0                  | 1.0           | 2315.0                  | 6.0           |
| 2024.0                  | 3.0           | 1955.0                  | 2.0           | 113.6                   | 2.0           | 2318.0                  | 18.0          |
| 2041.0                  | 4.0           | 1957.0                  | 2.0           | 122.1                   | 0.9           | 2379.0                  | 2.0           |
| 2042.0                  | 2.0           | 1963.0                  | 2.0           | 137.5                   | 2.1           | 2398.0                  | 2.0           |
| 2053.0                  | 1.0           | 1964.0                  | 3.0           | 145.2                   | 2.1           | 2412.0                  | 3.0           |
| 2055.0                  | 5.0           | 1965.0                  | 4.0           | 149.1                   | 1.4           | 2439.0                  | 2.0           |
| 2060.0                  | 6.0           | 1966.0                  | 3.0           | 154.0                   | 4.9           | 2446.0                  | 2.0           |
| 2072.0                  | 2.0           | 1975.0                  | 3.0           | 218.5                   | 7.6           | 2454.0                  | 3.0           |
| 2110.0                  | 3.0           | 1979.0                  | 5.0           | 288.4                   | 6.6           | 2456.0                  | 8.0           |
| 2115.0                  | 2.0           | 2000.0                  | 7.0           | 313.5                   | 14.7          | 2462.0                  | 2.0           |
| 2139.0                  | 42.0          | 2001.0                  | 4.0           | 321.4                   | 11.8          | 2470.0                  | 5.0           |
| 2160.0                  | 2.0           | 2015.0                  | 3.0           | 468.1                   | 25.2          | 2480.0                  | 5.0           |
| 2161.0                  | 75.0          | 2024.0                  | 3.0           | 596.3                   | 26.1          | 2488.0                  | 5.0           |
| 2217.0                  | 2.0           | 2026.0                  | 4.0           | 684.5                   | 22.6          | 2507.0                  | 3.0           |
| 2289.0                  | 3.0           | 2043.0                  | 5.0           | 1481.0                  | 4.0           | 2509.0                  | 3.0           |
| 2302.0                  | 4.0           | 2050.0                  | 3.0           | 1603.0                  | 9.0           | 2521.0                  | 5.0           |
| 2307.0                  | 3.0           | 2075.0                  | 10.0          | 1726.0                  | 5.0           | 2526.0                  | 2.0           |
| 2351.0                  | 8.0           | 2080.0                  | 6.0           | 1760.0                  | 2.0           | 2544.0                  | 3.0           |
| 2405.0                  | 7.0           | 2109.0                  | 2.0           | 1764.0                  | 2.0           | 2547.0                  | 5.0           |
| 2418.0                  | 1.0           | 2109.0                  | 8.0           | 1773.0                  | 2.0           | 2555.0                  | 1.0           |

| Zircon U-Pb Age<br>(Ma)                       | Error<br>(Ma) |
|-----------------------------------------------|---------------|
| 2560.0                                        | 1.0           |
| 2614.0                                        | 2.0           |
| 2665.0                                        | 2.0           |
| 2977.0                                        | 3.0           |
| 3116.0                                        | 1.0           |
| 3131.0                                        | 1.0           |
| 120.0                                         | 2.0           |
| 118.0                                         | 2.0           |
| 1856.0                                        | 7.0           |
| 1861.0                                        | 6.0           |
| 1866.0                                        | 6.0           |
| 1959.0                                        | 9.0           |
| 2010.0                                        | 9.0           |
| 2470.0                                        | 6.0           |
| 2493.0                                        | 5.0           |
| 2540.0                                        | 6.0           |
| 2562.0                                        | 6.0           |
| *All Data compiled by<br>Gehrels et al., 2011 |               |



**Table DR9. Compiled Zircon U-Pb Ages of Tectonic Blocks (Lesser Himalaya-Nepal) \***

|                         |       | Zircon U-Pb Age<br>(Ma) | Error<br>(Ma) | Zircon U-Pb Age<br>(Ma) | Error<br>(Ma) | Zircon U-Pb Age<br>(Ma) | Error<br>(Ma) |
|-------------------------|-------|-------------------------|---------------|-------------------------|---------------|-------------------------|---------------|
| Zircon U-Pb Age<br>(Ma) |       |                         |               |                         |               |                         |               |
| 1797.96                 | 56.37 | 2581.35                 | 1.94          | 2000.82                 | 1.17          | 1725.36                 | 27.19         |
| 1922.98                 | 6.49  | 2581.37                 | 2.99          | 2005.04                 | 5.33          | 1858.49                 | 8.07          |
| 1938.53                 | 3.04  | 2590.35                 | 2.33          | 2005.62                 | 5.23          | 1865.10                 | 11.95         |
| 1947.68                 | 2.46  | 2592.00                 | 7.70          | 2005.74                 | 8.17          | 1893.98                 | 18.07         |
| 1950.76                 | 5.84  | 2596.42                 | 5.59          | 2005.78                 | 5.97          | 1904.15                 | 5.37          |
| 1955.90                 | 2.74  | 2597.21                 | 2.15          | 2008.76                 | 2.77          | 1914.26                 | 4.42          |
| 1977.20                 | 5.91  | 2601.68                 | 1.27          | 2009.91                 | 2.52          | 1916.07                 | 11.87         |
| 1989.38                 | 3.83  | 2607.04                 | 26.92         | 2015.68                 | 3.14          | 1916.50                 | 6.04          |
| 2005.80                 | 4.36  | 2618.64                 | 10.37         | 2025.95                 | 8.26          | 1917.45                 | 8.57          |
| 2021.74                 | 4.26  | 2636.21                 | 1.00          | 2027.89                 | 5.64          | 1936.53                 | 4.61          |
| 2035.94                 | 2.84  | 2688.65                 | 2.00          | 2033.92                 | 2.01          | 1938.23                 | 4.81          |
| 2036.86                 | 9.87  | 2689.70                 | 2.77          | 2049.76                 | 2.82          | 1938.33                 | 7.94          |
| 2038.76                 | 2.41  | 2693.18                 | 1.73          | 2056.27                 | 18.13         | 1940.10                 | 7.07          |
| 2042.24                 | 2.38  | 2718.28                 | 5.94          | 2062.11                 | 1.94          | 1944.27                 | 14.25         |
| 2045.76                 | 4.21  | 2729.73                 | 4.43          | 2064.58                 | 3.68          | 1949.85                 | 8.35          |
| 2046.04                 | 3.56  | 2779.47                 | 2.09          | 2074.04                 | 8.64          | 1950.31                 | 6.95          |
| 2080.31                 | 6.53  | 2787.85                 | 2.30          | 2084.86                 | 10.54         | 1951.65                 | 6.28          |
| 2084.15                 | 6.70  | 2792.70                 | 2.54          | 2099.55                 | 5.35          | 1953.60                 | 5.77          |
| 2101.98                 | 6.22  | 2845.38                 | 1.47          | 2137.34                 | 2.21          | 1953.64                 | 5.05          |
| 2108.28                 | 1.90  | 2845.75                 | 1.35          | 2192.65                 | 6.37          | 1954.98                 | 5.00          |
| 2116.50                 | 2.89  | 2860.20                 | 3.17          | 2199.00                 | 12.12         | 1955.04                 | 10.37         |
| 2127.39                 | 5.27  | 2942.74                 | 2.20          | 2217.38                 | 4.95          | 1956.60                 | 6.64          |
| 2136.61                 | 2.33  | 3348.01                 | 1.26          | 2224.03                 | 2.66          | 1957.20                 | 4.51          |
| 2138.20                 | 1.80  | 1882.00                 | 22.00         | 2225.58                 | 1.33          | 1958.84                 | 4.36          |
| 2141.55                 | 3.48  | 1947.00                 | 12.00         | 2228.06                 | 6.47          | 1959.86                 | 8.77          |
| 2150.65                 | 3.72  | 1966.00                 | 10.00         | 2235.30                 | 2.79          | 1960.13                 | 7.10          |
| 2151.01                 | 5.77  | 2186.00                 | 16.00         | 2241.66                 | 6.70          | 1961.34                 | 3.99          |
| 2156.86                 | 1.35  | 2238.00                 | 7.00          | 2296.88                 | 2.10          | 1964.23                 | 4.73          |
| 2166.78                 | 4.24  | 2358.00                 | 16.00         | 2304.84                 | 1.89          | 1970.08                 | 4.08          |
| 2188.65                 | 9.15  | 2398.00                 | 7.00          | 2311.89                 | 0.80          | 1975.80                 | 16.79         |
| 2208.13                 | 19.34 | 2420.00                 | 6.00          | 2348.70                 | 6.73          | 1977.04                 | 6.12          |
| 2217.88                 | 1.22  | 1876.97                 | 9.78          | 2373.47                 | 13.84         | 1980.27                 | 10.58         |
| 2222.02                 | 4.77  | 1877.08                 | 4.41          | 2392.30                 | 3.74          | 1981.27                 | 3.48          |
| 2231.34                 | 2.52  | 1888.03                 | 3.46          | 2400.44                 | 5.01          | 1982.40                 | 4.21          |
| 2233.36                 | 5.58  | 1896.19                 | 4.69          | 2432.08                 | 10.47         | 1986.65                 | 11.42         |
| 2236.02                 | 2.99  | 1896.51                 | 3.17          | 2451.46                 | 33.04         | 1992.35                 | 6.49          |
| 2250.80                 | 2.91  | 1898.41                 | 3.43          | 2466.99                 | 4.65          | 1996.59                 | 8.96          |
| 2251.25                 | 3.26  | 1903.70                 | 3.34          | 2480.28                 | 1.22          | 2001.07                 | 8.81          |
| 2264.30                 | 1.51  | 1914.49                 | 2.65          | 2493.69                 | 5.90          | 2004.15                 | 7.63          |
| 2270.47                 | 2.50  | 1915.43                 | 2.28          | 2500.42                 | 2.76          | 2016.78                 | 9.19          |
| 2328.25                 | 4.03  | 1918.39                 | 4.63          | 2503.95                 | 5.58          | 2019.46                 | 9.07          |
| 2356.59                 | 2.11  | 1918.86                 | 3.21          | 2515.51                 | 4.21          | 2149.08                 | 7.15          |
| 2365.56                 | 3.35  | 1920.78                 | 6.13          | 2533.91                 | 2.62          | 2263.15                 | 18.56         |
| 2368.23                 | 2.68  | 1923.20                 | 2.32          | 2540.74                 | 3.71          | 2280.37                 | 3.66          |
| 2374.73                 | 2.87  | 1927.92                 | 10.22         | 2543.46                 | 1.25          | 2427.20                 | 2.16          |
| 2395.45                 | 1.64  | 1929.33                 | 2.36          | 2545.90                 | 4.67          | 2428.75                 | 12.49         |
| 2417.58                 | 5.35  | 1929.48                 | 1.92          | 2550.61                 | 4.09          | 2552.23                 | 3.48          |
| 2523.62                 | 2.42  | 1930.96                 | 7.18          | 2555.73                 | 2.05          | 2568.61                 | 9.05          |
| 2535.37                 | 2.80  | 1932.04                 | 4.86          | 2556.31                 | 2.87          | 2593.34                 | 4.22          |
| 2543.05                 | 1.21  | 1932.06                 | 3.78          | 2562.29                 | 7.49          | 2663.46                 | 3.93          |
| 2545.69                 | 3.27  | 1932.07                 | 2.98          | 2573.40                 | 1.80          | 2671.28                 | 2.68          |
| 2548.11                 | 2.12  | 1932.65                 | 48.40         | 2574.88                 | 2.74          | 2687.20                 | 5.80          |
| 2553.49                 | 7.29  | 1939.38                 | 4.84          | 2629.32                 | 3.46          | 2690.24                 | 8.58          |
| 2555.07                 | 2.69  | 1941.69                 | 3.58          | 2720.23                 | 3.16          | 2779.39                 | 2.59          |
| 2563.28                 | 2.76  | 1944.54                 | 4.53          | 2722.74                 | 3.52          | 2925.10                 | 1.92          |
| 2568.86                 | 2.31  | 1949.58                 | 6.39          | 2759.43                 | 14.27         | 1834.00                 | 6.00          |
| 2572.03                 | 3.29  | 1955.03                 | 24.12         | 2763.54                 | 3.08          | 1841.00                 | 11.00         |
| 2573.42                 | 2.38  | 1963.33                 | 11.72         | 2769.04                 | 7.62          | 1843.00                 | 10.00         |
| 2578.71                 | 5.46  | 1968.87                 | 2.13          | 2954.84                 | 2.29          | 1846.00                 | 7.00          |
| 2579.29                 | 7.23  | 1969.26                 | 6.96          | 2990.64                 | 6.88          | 1847.00                 | 8.00          |
| 2580.42                 | 2.02  | 1971.28                 | 4.03          | 1936.00                 | 7.00          | 1859.00                 | 6.00          |
|                         |       | 1985.69                 | 3.35          | 1942.00                 | 8.00          | 1861.00                 | 6.00          |
|                         |       | 1985.94                 | 10.34         | 1948.00                 | 5.00          | 1866.00                 | 9.00          |
|                         |       | 1986.42                 | 3.79          | 2154.00                 | 7.00          | 2454.00                 | 6.00          |
|                         |       | 1993.57                 | 2.41          | 2314.00                 | 5.00          | 1661.00                 | 23.24         |

| Zircon U-Pb Age<br>(Ma) | Error<br>(Ma) |
|-------------------------|---------------|-------------------------|---------------|-------------------------|---------------|-------------------------|---------------|
| 1804.41                 | 6.80          | 1900.20                 | 4.28          | 1758.68                 | 6.45          | 1844.88                 | 11.85         |
| 1843.76                 | 4.55          | 1901.36                 | 14.21         | 1764.87                 | 11.61         | 1847.98                 | 4.28          |
| 1846.75                 | 3.71          | 1901.47                 | 22.78         | 1766.66                 | 5.79          | 601.55                  | 11.64         |
| 1847.10                 | 3.74          | 1902.63                 | 2.87          | 1770.25                 | 3.46          | 1857.56                 | 5.43          |
| 1849.54                 | 6.85          | 1940.11                 | 4.94          | 1771.24                 | 6.53          | 1895.70                 | 4.81          |
| 1851.78                 | 1.95          | 2018.07                 | 7.32          | 1774.34                 | 16.58         | 1910.27                 | 4.02          |
| 1855.11                 | 8.97          | 2086.85                 | 3.37          | 1781.36                 | 6.46          | 1916.41                 | 5.59          |
| 1855.86                 | 2.45          | 2103.13                 | 3.36          | 1793.22                 | 4.95          | 1925.21                 | 4.45          |
| 1856.13                 | 4.45          | 2153.69                 | 3.14          | 1797.72                 | 14.62         | 1926.55                 | 4.80          |
| 1858.40                 | 2.10          | 2159.19                 | 4.12          | 1801.03                 | 9.26          | 1928.36                 | 6.78          |
| 1860.86                 | 3.53          | 2175.68                 | 14.50         | 1806.83                 | 5.47          | 1933.06                 | 4.12          |
| 1864.70                 | 4.47          | 2277.39                 | 5.93          | 1810.99                 | 6.53          | 1947.30                 | 4.84          |
| 1865.32                 | 3.52          | 2313.50                 | 2.54          | 1834.12                 | 4.76          | 1949.11                 | 4.63          |
| 1865.99                 | 2.50          | 2332.70                 | 5.71          | 1861.20                 | 5.90          | 1967.62                 | 3.97          |
| 1866.12                 | 6.36          | 2354.86                 | 10.08         | 1887.40                 | 7.48          | 1979.60                 | 4.75          |
| 1867.56                 | 1.12          | 2399.64                 | 2.41          | 2144.70                 | 3.95          | 2003.84                 | 8.85          |
| 1868.13                 | 7.01          | 2405.76                 | 1.88          | 2443.47                 | 9.53          | 2018.38                 | 6.28          |
| 1868.26                 | 4.62          | 2422.85                 | 1.79          | 2453.13                 | 5.66          | 2021.58                 | 25.19         |
| 1868.40                 | 3.92          | 2435.14                 | 5.04          | 2520.00                 | 3.70          | 2084.59                 | 9.23          |
| 1868.44                 | 8.65          | 2468.27                 | 6.39          | 1673.00                 | 8.00          | 2149.07                 | 7.95          |
| 1869.21                 | 7.53          | 2485.87                 | 2.75          | 1682.00                 | 30.00         | 2234.28                 | 3.85          |
| 1870.80                 | 9.00          | 2493.52                 | 5.03          | 1684.00                 | 19.00         | 2286.77                 | 8.01          |
| 1871.89                 | 1.67          | 2537.39                 | 3.70          | 1699.00                 | 18.00         | 2316.09                 | 9.20          |
| 1872.28                 | 6.72          | 2680.04                 | 1.23          | 1892.00                 | 14.00         | 2367.87                 | 2.81          |
| 1873.07                 | 5.25          | 2693.01                 | 3.01          | 1988.00                 | 15.00         | 2515.80                 | 3.43          |
| 1874.25                 | 2.27          | 2719.51                 | 2.44          | 2046.00                 | 9.00          | 2540.22                 | 4.78          |
| 1875.51                 | 2.25          | 2728.14                 | 1.04          | 1848.55                 | 31.56         | 2555.33                 | 3.05          |
| 1875.69                 | 2.75          | 3352.02                 | 2.88          | 1858.34                 | 13.81         | 2555.99                 | 6.62          |
| 1876.39                 | 4.65          | 1842.00                 | 8.00          | 1866.80                 | 10.42         | 2673.57                 | 3.40          |
| 1876.42                 | 3.73          | 1847.00                 | 6.00          | 1869.20                 | 3.14          | 2752.73                 | 10.01         |
| 1876.72                 | 6.33          | 1866.00                 | 9.00          | 1886.62                 | 26.78         | 2774.02                 | 5.25          |
| 1876.76                 | 8.28          | 1860.00                 | 5.00          | 1886.70                 | 5.16          | 2900.63                 | 1.59          |
| 1878.29                 | 3.48          | 1862.00                 | 7.00          | 1914.32                 | 11.84         | 3300.51                 | 1.16          |
| 1879.28                 | 1.55          | 1862.00                 | 5.00          | 1935.48                 | 1.92          | 1604.00                 | 11.00         |
| 1879.33                 | 3.01          | 1865.00                 | 6.00          | 1949.90                 | 7.01          | 1644.00                 | 13.00         |
| 1879.79                 | 5.11          | 1869.00                 | 5.00          | 1950.62                 | 7.60          | 1726.00                 | 14.00         |
| 1880.11                 | 4.06          | 1869.00                 | 9.00          | 1965.74                 | 9.52          | 1836.00                 | 10.00         |
| 1880.46                 | 1.94          | 1870.00                 | 8.00          | 1966.66                 | 14.06         | 2106.00                 | 12.00         |
| 1880.91                 | 2.98          | 1458.26                 | 15.74         | 1975.97                 | 28.41         | 2406.00                 | 10.00         |
| 1880.98                 | 2.48          | 1473.82                 | 25.40         | 2035.49                 | 3.12          | 2434.00                 | 7.00          |
| 1881.23                 | 5.34          | 1481.12                 | 6.33          | 2051.01                 | 13.94         | 2480.00                 | 7.00          |
| 1881.29                 | 2.56          | 1484.80                 | 14.59         | 2099.91                 | 10.20         | 2501.00                 | 11.00         |
| 1881.96                 | 5.05          | 1533.49                 | 25.89         | 2471.62                 | 4.52          | 2529.00                 | 12.00         |
| 1882.03                 | 4.84          | 1578.07                 | 14.69         | 2494.58                 | 6.86          | 1757.78                 | 33.58         |
| 1882.58                 | 2.24          | 1594.79                 | 6.69          | 2533.92                 | 5.74          | 1769.59                 | 18.27         |
| 1882.96                 | 3.81          | 1598.68                 | 5.88          | 2564.49                 | 8.21          | 1774.44                 | 31.44         |
| 1882.96                 | 3.28          | 1605.25                 | 11.17         | 2567.27                 | 3.65          | 1776.46                 | 29.58         |
| 1882.98                 | 4.31          | 1644.59                 | 8.57          | 2568.68                 | 5.01          | 1777.28                 | 18.27         |
| 1883.24                 | 4.10          | 1647.76                 | 7.86          | 2600.01                 | 19.11         | 1777.66                 | 33.48         |
| 1883.99                 | 7.51          | 1652.81                 | 5.38          | 2620.97                 | 5.69          | 1778.14                 | 35.22         |
| 1884.09                 | 4.46          | 1656.91                 | 15.95         | 2781.77                 | 5.17          | 1780.20                 | 22.63         |
| 1885.54                 | 1.54          | 1659.54                 | 14.93         | 2849.86                 | 2.64          | 1786.64                 | 21.87         |
| 1888.03                 | 2.42          | 1690.01                 | 13.30         | 1614.00                 | 25.00         | 1787.24                 | 18.23         |
| 1888.28                 | 7.55          | 1698.93                 | 4.71          | 1715.00                 | 9.00          | 1787.31                 | 22.06         |
| 1888.31                 | 2.40          | 1702.30                 | 9.76          | 1718.00                 | 24.00         | 1788.82                 | 27.56         |
| 1890.18                 | 3.26          | 1711.92                 | 4.78          | 1834.00                 | 15.00         | 1789.69                 | 19.86         |
| 1891.00                 | 3.05          | 1713.38                 | 2.86          | 1851.00                 | 9.00          | 1792.87                 | 24.04         |
| 1891.02                 | 6.07          | 1715.60                 | 5.31          | 1858.00                 | 8.00          | 1793.50                 | 21.32         |
| 1891.85                 | 5.07          | 1739.05                 | 6.02          | 1935.00                 | 7.00          | 1798.16                 | 33.50         |
| 1892.11                 | 1.98          | 1747.59                 | 8.49          | 1961.00                 | 8.00          | 1798.54                 | 26.26         |
| 1892.37                 | 8.34          | 1747.97                 | 5.73          | 2469.00                 | 5.00          | 1798.71                 | 22.58         |
| 1892.84                 | 4.30          | 1749.37                 | 7.01          | 2476.00                 | 5.00          | 1802.22                 | 18.19         |
| 1895.90                 | 8.17          | 1754.53                 | 6.94          | 1769.89                 | 5.75          | 1802.66                 | 19.83         |
| 1898.42                 | 6.84          | 1756.39                 | 6.04          | 1823.60                 | 5.31          | 1802.91                 | 24.93         |
| 1899.50                 | 5.80          | 1757.24                 | 7.31          | 1837.01                 | 11.40         | 1804.15                 | 18.26         |

| Zircon U-Pb Age<br>(Ma) | Error<br>(Ma) |
|-------------------------|---------------|-------------------------|---------------|-------------------------|---------------|-------------------------|---------------|
| 1805.90                 | 23.12         | 3050.87                 | 16.00         | 1694.00                 | 11.00         | 1876.60                 | 34.08         |
| 1806.13                 | 26.36         | 3057.10                 | 29.76         | 1694.00                 | 18.00         | 1881.25                 | 19.48         |
| 1808.79                 | 50.36         | 3082.94                 | 41.03         | 1695.00                 | 7.00          | 1881.55                 | 27.75         |
| 1809.32                 | 34.72         | 3102.51                 | 19.60         | 1699.00                 | 10.00         | 1883.00                 | 22.88         |
| 1811.68                 | 36.72         | 3105.44                 | 15.95         | 1700.00                 | 13.00         | 1885.17                 | 44.30         |
| 1817.07                 | 44.85         | 3105.60                 | 24.23         | 1707.00                 | 54.00         | 1885.92                 | 23.59         |
| 1819.04                 | 34.13         | 3116.84                 | 15.92         | 1709.00                 | 12.00         | 1889.10                 | 47.55         |
| 1822.00                 | 35.82         | 3143.69                 | 17.79         | 1710.00                 | 13.00         | 1890.59                 | 48.60         |
| 1847.42                 | 26.27         | 3144.90                 | 34.48         | 1710.00                 | 14.00         | 1891.83                 | 21.79         |
| 1871.30                 | 18.04         | 3154.04                 | 24.92         | 1712.00                 | 16.00         | 1896.79                 | 37.05         |
| 1872.25                 | 18.04         | 3180.66                 | 27.09         | 1718.00                 | 14.00         | 1899.43                 | 27.51         |
| 1874.54                 | 19.67         | 3199.76                 | 15.81         | 1718.00                 | 15.00         | 1900.80                 | 37.59         |
| 1876.13                 | 34.08         | 3352.31                 | 23.90         | 1719.00                 | 14.00         | 1902.83                 | 23.90         |
| 1892.11                 | 70.74         | 1795.00                 | 11.00         | 1721.00                 | 8.00          | 1902.89                 | 23.54         |
| 1893.45                 | 21.96         | 1794.00                 | 11.00         | 1722.00                 | 19.00         | 1903.60                 | 23.90         |
| 1900.98                 | 41.21         | 1788.00                 | 11.00         | 1731.00                 | 14.00         | 1907.65                 | 25.86         |
| 1902.95                 | 22.47         | 1806.00                 | 11.00         | 1732.00                 | 9.00          | 1908.75                 | 27.80         |
| 1904.21                 | 29.33         | 1796.00                 | 6.00          | 1732.00                 | 14.00         | 1913.59                 | 49.02         |
| 1918.80                 | 55.67         | 1801.00                 | 7.00          | 1733.00                 | 17.00         | 1930.34                 | 24.01         |
| 1973.42                 | 17.82         | 1797.00                 | 6.00          | 1736.00                 | 14.00         | 1930.96                 | 25.53         |
| 2002.78                 | 25.04         | 1801.00                 | 7.00          | 1767.00                 | 16.00         | 1932.24                 | 35.10         |
| 2021.95                 | 21.44         | 1797.00                 | 7.00          | 1768.00                 | 15.00         | 1952.38                 | 24.88         |
| 2035.12                 | 18.22         | 1796.00                 | 7.00          | 1778.00                 | 13.00         | 1952.43                 | 30.55         |
| 2068.27                 | 22.92         | 1799.00                 | 6.00          | 1787.00                 | 24.00         | 1953.06                 | 51.63         |
| 2158.65                 | 28.97         | 1787.00                 | 7.00          | 1787.00                 | 12.00         | 1954.00                 | 26.62         |
| 2171.66                 | 18.65         | 1793.00                 | 9.00          | 1790.00                 | 20.00         | 1960.27                 | 35.74         |
| 2224.44                 | 27.89         | 1782.00                 | 9.00          | 1794.00                 | 12.00         | 1963.16                 | 19.46         |
| 2239.93                 | 37.53         | 1791.00                 | 9.00          | 1809.00                 | 35.00         | 1964.30                 | 17.13         |
| 2272.73                 | 41.88         | 1787.00                 | 9.00          | 1809.00                 | 13.00         | 1972.94                 | 31.01         |
| 2305.15                 | 17.55         | 1800.00                 | 9.00          | 1813.00                 | 8.00          | 1984.26                 | 34.73         |
| 2380.00                 | 17.04         | 1799.00                 | 9.00          | 1825.00                 | 11.00         | 1989.86                 | 26.39         |
| 2395.93                 | 27.92         | 1780.00                 | 9.00          | 1833.00                 | 21.00         | 2006.59                 | 44.08         |
| 2410.73                 | 26.33         | 1784.00                 | 9.00          | 1861.00                 | 18.00         | 2053.29                 | 39.57         |
| 2503.81                 | 25.75         | 1787.00                 | 9.00          | 1883.00                 | 14.00         | 2057.65                 | 34.25         |
| 2525.87                 | 70.04         | 1514.00                 | 41.00         | 1937.00                 | 11.00         | 2068.77                 | 16.59         |
| 2555.08                 | 24.62         | 1553.00                 | 15.00         | 1946.00                 | 15.00         | 2070.16                 | 16.57         |
| 2558.28                 | 25.43         | 1563.00                 | 14.00         | 1960.00                 | 15.00         | 2071.73                 | 18.59         |
| 2558.60                 | 54.76         | 1568.00                 | 11.00         | 2012.00                 | 16.00         | 2072.21                 | 61.33         |
| 2560.58                 | 18.91         | 1569.00                 | 15.00         | 2220.00                 | 15.00         | 2083.46                 | 32.80         |
| 2563.29                 | 44.17         | 1576.00                 | 15.00         | 2461.00                 | 14.00         | 2087.16                 | 29.55         |
| 2574.54                 | 33.09         | 1594.00                 | 34.00         | 2525.00                 | 13.00         | 2100.49                 | 25.29         |
| 2606.80                 | 33.82         | 1605.00                 | 22.00         | 2532.00                 | 14.00         | 2123.67                 | 31.53         |
| 2622.39                 | 19.30         | 1622.00                 | 11.00         | 1770.20                 | 34.17         | 2127.88                 | 25.21         |
| 2656.57                 | 33.85         | 1622.00                 | 40.00         | 1777.54                 | 27.74         | 2150.62                 | 35.99         |
| 2659.84                 | 54.38         | 1623.00                 | 14.00         | 1780.59                 | 47.25         | 2151.40                 | 43.49         |
| 2680.32                 | 51.31         | 1625.00                 | 33.00         | 1795.69                 | 54.44         | 2167.63                 | 17.96         |
| 2742.55                 | 27.81         | 1625.00                 | 14.00         | 1801.07                 | 57.46         | 2168.74                 | 16.56         |
| 2790.34                 | 22.92         | 1632.00                 | 15.00         | 1811.32                 | 42.71         | 2168.81                 | 74.29         |
| 2917.24                 | 19.75         | 1634.00                 | 23.00         | 1841.63                 | 55.25         | 2170.17                 | 26.72         |
| 2922.38                 | 26.39         | 1638.00                 | 12.00         | 1844.68                 | 20.85         | 2176.54                 | 64.11         |
| 2946.00                 | 16.15         | 1639.00                 | 8.00          | 1846.54                 | 26.42         | 2187.89                 | 32.53         |
| 2947.22                 | 16.15         | 1642.00                 | 15.00         | 1847.59                 | 18.67         | 2189.22                 | 22.45         |
| 2966.76                 | 18.54         | 1646.00                 | 10.00         | 1848.36                 | 41.98         | 2197.64                 | 27.08         |
| 2975.55                 | 17.07         | 1655.00                 | 12.00         | 1849.40                 | 35.45         | 2206.83                 | 18.60         |
| 2986.88                 | 18.36         | 1661.00                 | 9.00          | 1853.11                 | 38.32         | 2242.39                 | 33.40         |
| 3010.59                 | 32.77         | 1669.00                 | 32.00         | 1863.04                 | 36.11         | 2251.92                 | 58.65         |
| 3016.63                 | 18.79         | 1671.00                 | 9.00          | 1865.15                 | 40.98         | 2255.13                 | 33.67         |
| 3018.41                 | 37.89         | 1673.00                 | 16.00         | 1868.89                 | 36.27         | 2287.82                 | 37.59         |
| 3025.09                 | 29.04         | 1675.00                 | 10.00         | 1870.18                 | 22.73         | 2307.03                 | 29.50         |
| 3028.77                 | 46.84         | 1677.00                 | 7.00          | 1870.71                 | 19.15         | 2341.15                 | 16.12         |
| 3029.95                 | 65.45         | 1683.00                 | 9.00          | 1871.28                 | 34.10         | 2341.72                 | 24.13         |
| 3037.57                 | 16.02         | 1685.00                 | 14.00         | 1871.46                 | 31.41         | 2351.55                 | 20.17         |
| 3039.23                 | 24.83         | 1687.00                 | 21.00         | 1873.01                 | 22.02         | 2368.64                 | 24.23         |
| 3045.51                 | 24.02         | 1689.00                 | 25.00         | 1873.14                 | 33.38         | 2376.96                 | 22.63         |
| 3048.15                 | 28.98         | 1692.00                 | 12.00         | 1875.91                 | 49.77         | 2380.92                 | 22.84         |

| Zircon U-Pb Age<br>(Ma) | Error<br>(Ma) |
|-------------------------|---------------|-------------------------|---------------|-------------------------|---------------|-------------------------|---------------|
| 2381.34                 | 24.40         | 2751.68                 | 27.77         | 1888.98                 | 43.03         | 2031.59                 | 28.50         |
| 2397.06                 | 20.60         | 2756.54                 | 23.98         | 1889.37                 | 57.79         | 2044.48                 | 12.07         |
| 2398.18                 | 40.48         | 2758.61                 | 27.42         | 1890.66                 | 35.28         | 2047.08                 | 33.40         |
| 2414.36                 | 26.66         | 2787.43                 | 27.52         | 1890.83                 | 41.03         | 2056.09                 | 63.21         |
| 2423.91                 | 23.09         | 2789.54                 | 19.65         | 1890.89                 | 48.05         | 2070.28                 | 26.12         |
| 2438.45                 | 33.88         | 2790.43                 | 48.81         | 1891.96                 | 60.47         | 2072.87                 | 40.52         |
| 2440.99                 | 74.64         | 2831.50                 | 28.88         | 1892.25                 | 11.16         | 2078.50                 | 24.65         |
| 2450.22                 | 37.74         | 3011.45                 | 32.28         | 1892.59                 | 41.38         | 2096.08                 | 10.74         |
| 2451.27                 | 26.90         | 3120.91                 | 19.77         | 1893.04                 | 28.07         | 2117.16                 | 24.54         |
| 2460.93                 | 19.60         | 1758.41                 | 57.80         | 1894.25                 | 68.74         | 2141.40                 | 60.41         |
| 2463.28                 | 47.00         | 1781.39                 | 33.56         | 1894.79                 | 19.25         | 2145.98                 | 19.11         |
| 2464.12                 | 35.32         | 1793.00                 | 20.22         | 1895.66                 | 33.45         | 2164.04                 | 53.72         |
| 2465.52                 | 36.66         | 1799.36                 | 17.29         | 1896.50                 | 27.34         | 2179.55                 | 76.81         |
| 2466.29                 | 36.33         | 1800.72                 | 24.57         | 1897.98                 | 40.10         | 2185.94                 | 74.32         |
| 2470.96                 | 20.77         | 1804.25                 | 20.91         | 1899.77                 | 40.09         | 2192.26                 | 43.99         |
| 2477.42                 | 44.63         | 1806.17                 | 30.36         | 1900.05                 | 31.46         | 2193.72                 | 28.68         |
| 2481.76                 | 30.36         | 1806.75                 | 36.13         | 1901.09                 | 34.87         | 2198.27                 | 40.14         |
| 2482.34                 | 54.89         | 1807.35                 | 33.09         | 1901.78                 | 44.22         | 2214.01                 | 14.58         |
| 2482.46                 | 33.56         | 1813.14                 | 21.26         | 1902.22                 | 30.39         | 2220.71                 | 42.64         |
| 2485.64                 | 45.45         | 1817.93                 | 24.33         | 1902.88                 | 26.78         | 2230.61                 | 17.83         |
| 2485.78                 | 33.21         | 1823.47                 | 70.78         | 1902.97                 | 63.99         | 2251.38                 | 29.88         |
| 2493.02                 | 37.42         | 1825.83                 | 29.93         | 1903.66                 | 38.46         | 2256.56                 | 64.42         |
| 2496.61                 | 38.41         | 1827.56                 | 47.70         | 1903.87                 | 15.46         | 2278.90                 | 13.62         |
| 2498.73                 | 26.61         | 1830.47                 | 45.15         | 1904.05                 | 27.13         | 2348.15                 | 60.37         |
| 2505.14                 | 23.39         | 1847.74                 | 31.32         | 1904.76                 | 19.77         | 2353.63                 | 38.45         |
| 2506.58                 | 25.24         | 1849.19                 | 79.25         | 1906.49                 | 44.73         | 2377.84                 | 33.76         |
| 2506.77                 | 31.63         | 1849.19                 | 30.95         | 1906.78                 | 33.59         | 2404.84                 | 16.66         |
| 2507.87                 | 33.16         | 1852.71                 | 21.16         | 1907.20                 | 44.37         | 2419.09                 | 28.01         |
| 2510.41                 | 35.96         | 1857.47                 | 28.01         | 1908.72                 | 39.51         | 2421.49                 | 57.37         |
| 2514.72                 | 18.83         | 1858.75                 | 39.04         | 1914.08                 | 62.28         | 2453.58                 | 22.67         |
| 2520.67                 | 33.44         | 1858.96                 | 31.62         | 1915.39                 | 25.30         | 2453.69                 | 15.39         |
| 2521.84                 | 24.36         | 1859.12                 | 41.20         | 1915.64                 | 18.49         | 2468.96                 | 22.29         |
| 2521.87                 | 22.51         | 1859.19                 | 30.11         | 1920.14                 | 27.27         | 2478.04                 | 36.95         |
| 2527.13                 | 33.58         | 1859.60                 | 26.57         | 1920.62                 | 45.20         | 2482.79                 | 50.28         |
| 2531.17                 | 28.70         | 1862.51                 | 14.45         | 1922.22                 | 18.82         | 2489.11                 | 56.81         |
| 2537.11                 | 39.09         | 1862.77                 | 38.28         | 1923.10                 | 34.79         | 2497.38                 | 23.75         |
| 2542.32                 | 18.80         | 1863.32                 | 44.60         | 1925.87                 | 45.55         | 2501.76                 | 53.37         |
| 2543.98                 | 34.04         | 1864.90                 | 22.59         | 1926.03                 | 52.34         | 2506.78                 | 73.72         |
| 2546.85                 | 32.18         | 1866.73                 | 23.30         | 1929.22                 | 51.60         | 2517.41                 | 33.78         |
| 2549.69                 | 17.76         | 1866.87                 | 39.72         | 1931.50                 | 29.01         | 2523.72                 | 32.08         |
| 2549.94                 | 28.31         | 1867.16                 | 45.50         | 1934.39                 | 53.54         | 2526.76                 | 29.05         |
| 2551.07                 | 29.67         | 1867.19                 | 30.32         | 1936.20                 | 15.79         | 2528.15                 | 31.91         |
| 2551.32                 | 43.91         | 1867.72                 | 53.10         | 1937.72                 | 32.75         | 2529.52                 | 26.69         |
| 2557.83                 | 26.28         | 1868.93                 | 18.78         | 1939.84                 | 18.08         | 2536.78                 | 33.38         |
| 2559.01                 | 25.11         | 1869.62                 | 32.11         | 1942.12                 | 39.17         | 2537.59                 | 27.85         |
| 2565.12                 | 38.81         | 1870.73                 | 25.26         | 1950.16                 | 20.55         | 2543.33                 | 51.30         |
| 2574.31                 | 46.04         | 1870.83                 | 13.89         | 1950.39                 | 19.48         | 2547.53                 | 40.39         |
| 2580.33                 | 31.57         | 1871.86                 | 41.31         | 1950.57                 | 12.17         | 2559.45                 | 42.01         |
| 2584.05                 | 23.05         | 1873.37                 | 23.62         | 1953.50                 | 75.41         | 2570.67                 | 18.22         |
| 2586.77                 | 17.36         | 1877.95                 | 90.53         | 1958.92                 | 45.17         | 2579.34                 | 52.80         |
| 2595.68                 | 52.38         | 1880.03                 | 40.37         | 1960.41                 | 49.09         | 2584.43                 | 14.52         |
| 2602.19                 | 27.67         | 1882.52                 | 28.28         | 1960.99                 | 30.88         | 2595.37                 | 32.86         |
| 2620.04                 | 24.12         | 1882.71                 | 34.23         | 1963.36                 | 25.35         | 2599.85                 | 30.01         |
| 2635.47                 | 22.60         | 1884.18                 | 22.16         | 1965.48                 | 34.96         | 2613.25                 | 42.46         |
| 2673.58                 | 47.87         | 1884.44                 | 40.52         | 1966.69                 | 33.89         | 2655.46                 | 40.63         |
| 2682.34                 | 17.37         | 1886.42                 | 34.93         | 1968.92                 | 63.49         | 2738.72                 | 18.26         |
| 2682.69                 | 48.47         | 1886.44                 | 19.45         | 1970.95                 | 27.63         | 2743.98                 | 12.33         |
| 2700.00                 | 31.38         | 1886.88                 | 43.21         | 1981.16                 | 47.54         | 2761.59                 | 22.01         |
| 2700.57                 | 77.48         | 1887.24                 | 27.01         | 1991.87                 | 40.55         | 2845.00                 | 25.58         |
| 2702.68                 | 40.78         | 1887.35                 | 19.80         | 1992.33                 | 33.79         | 2853.39                 | 35.82         |
| 2715.72                 | 29.68         | 1888.54                 | 26.29         | 1993.15                 | 25.07         | 3511.42                 | 29.04         |
| 2717.11                 | 19.13         | 1888.67                 | 35.29         | 1999.41                 | 43.53         | 1735.16                 | 18.57         |
| 2728.84                 | 32.15         | 1888.88                 | 31.69         | 2022.16                 | 43.24         | 1747.86                 | 20.15         |
| 2731.88                 | 22.06         | 1888.94                 | 30.60         | 2022.46                 | 54.23         | 1750.84                 | 26.73         |
| 2746.90                 | 28.44         | 1888.97                 | 32.58         | 2023.84                 | 20.91         | 1753.05                 | 29.83         |

| Zircon U-Pb Age<br>(Ma) | Error<br>(Ma) |
|-------------------------|---------------|-------------------------|---------------|-------------------------|---------------|-------------------------|---------------|
| 1756.63                 | 23.07         | 1891.13                 | 18.03         | 1876.94                 | 18.02         | 1939.90                 | 22.44         |
| 1761.54                 | 24.68         | 1894.77                 | 25.04         | 1878.93                 | 23.97         | 1952.25                 | 18.22         |
| 1763.90                 | 18.28         | 1904.73                 | 17.97         | 1879.20                 | 22.16         | 1960.31                 | 31.77         |
| 1769.68                 | 21.93         | 1905.80                 | 18.00         | 1879.43                 | 18.03         | 1962.96                 | 21.41         |
| 1769.80                 | 27.95         | 1909.92                 | 32.14         | 1880.63                 | 18.03         | 1968.32                 | 17.84         |
| 1771.48                 | 23.56         | 1914.64                 | 23.87         | 1881.10                 | 21.62         | 1971.63                 | 21.21         |
| 1771.63                 | 18.64         | 1926.29                 | 17.93         | 1881.88                 | 27.74         | 1979.69                 | 46.49         |
| 1777.52                 | 33.26         | 1928.12                 | 17.92         | 1882.14                 | 18.04         | 1980.43                 | 17.80         |
| 1779.65                 | 32.66         | 1933.27                 | 21.71         | 1883.54                 | 18.03         | 1992.80                 | 21.52         |
| 1780.44                 | 22.25         | 1938.97                 | 30.46         | 1883.91                 | 27.20         | 1998.03                 | 23.81         |
| 1780.99                 | 25.00         | 1952.44                 | 26.47         | 1884.38                 | 18.02         | 2004.10                 | 19.95         |
| 1782.57                 | 18.23         | 1980.47                 | 25.30         | 1885.46                 | 29.57         | 2011.22                 | 23.78         |
| 1785.42                 | 24.81         | 1985.92                 | 17.80         | 1886.59                 | 22.51         | 2020.75                 | 35.09         |
| 1786.01                 | 21.88         | 2008.57                 | 35.32         | 1887.20                 | 25.75         | 2022.73                 | 24.64         |
| 1786.02                 | 44.48         | 2037.42                 | 28.34         | 1889.74                 | 20.71         | 2040.40                 | 17.69         |
| 1786.24                 | 21.69         | 2078.32                 | 18.32         | 1889.87                 | 31.31         | 2048.06                 | 26.18         |
| 1786.81                 | 31.96         | 2124.86                 | 22.99         | 1889.90                 | 22.37         | 2052.24                 | 17.83         |
| 1788.61                 | 38.09         | 2129.42                 | 26.09         | 1890.17                 | 55.99         | 2053.83                 | 26.86         |
| 1789.78                 | 26.44         | 2180.10                 | 17.48         | 1890.32                 | 30.08         | 2057.49                 | 23.49         |
| 1789.87                 | 23.58         | 2215.82                 | 39.19         | 1890.35                 | 18.00         | 2079.52                 | 37.16         |
| 1790.20                 | 36.62         | 2217.86                 | 21.67         | 1891.13                 | 19.80         | 2088.38                 | 21.81         |
| 1790.89                 | 19.16         | 2250.30                 | 21.80         | 1891.83                 | 18.00         | 2090.36                 | 30.42         |
| 1792.19                 | 18.23         | 2270.33                 | 25.17         | 1892.39                 | 27.01         | 2091.83                 | 17.58         |
| 1792.76                 | 18.22         | 2348.05                 | 22.23         | 1893.19                 | 17.99         | 2156.11                 | 31.94         |
| 1793.89                 | 22.94         | 2410.84                 | 23.44         | 1894.40                 | 17.99         | 2178.68                 | 17.43         |
| 1794.09                 | 18.25         | 2442.28                 | 26.75         | 1895.67                 | 29.86         | 2185.25                 | 65.43         |
| 1794.26                 | 28.94         | 2492.22                 | 23.42         | 1895.86                 | 21.05         | 2191.79                 | 17.46         |
| 1795.35                 | 18.35         | 2493.81                 | 27.13         | 1897.48                 | 34.71         | 2199.19                 | 30.40         |
| 1804.74                 | 21.54         | 2503.52                 | 18.35         | 1898.71                 | 19.42         | 2202.68                 | 20.68         |
| 1804.88                 | 18.18         | 2503.65                 | 26.14         | 1899.49                 | 17.98         | 2205.19                 | 17.36         |
| 1805.61                 | 26.67         | 2504.24                 | 54.03         | 1899.84                 | 19.79         | 2209.14                 | 26.90         |
| 1808.66                 | 28.36         | 2514.02                 | 22.69         | 1901.35                 | 17.97         | 2252.50                 | 56.00         |
| 1809.28                 | 18.17         | 2522.43                 | 16.79         | 1902.25                 | 17.97         | 2257.85                 | 20.54         |
| 1810.13                 | 18.17         | 2537.49                 | 28.69         | 1904.17                 | 17.97         | 2271.74                 | 31.90         |
| 1810.58                 | 29.64         | 2543.65                 | 26.99         | 1904.33                 | 17.97         | 2292.77                 | 41.62         |
| 1810.81                 | 18.17         | 2546.74                 | 28.66         | 1904.40                 | 17.97         | 2295.27                 | 35.94         |
| 1811.30                 | 25.11         | 2548.63                 | 23.80         | 1906.82                 | 17.96         | 2301.11                 | 17.18         |
| 1811.48                 | 29.69         | 2550.49                 | 37.54         | 1906.88                 | 17.96         | 2384.41                 | 17.04         |
| 1811.54                 | 29.27         | 2565.30                 | 26.76         | 1907.02                 | 31.43         | 2441.72                 | 16.93         |
| 1811.96                 | 18.17         | 2595.67                 | 16.69         | 1907.47                 | 17.96         | 2452.75                 | 26.06         |
| 1812.76                 | 25.27         | 2598.30                 | 16.68         | 1908.16                 | 31.25         | 2453.14                 | 31.82         |
| 1814.13                 | 21.44         | 2657.24                 | 16.60         | 1908.18                 | 28.38         | 2485.93                 | 16.87         |
| 1814.92                 | 27.98         | 2683.33                 | 22.19         | 1908.24                 | 21.81         | 2496.17                 | 16.84         |
| 1815.99                 | 21.45         | 2745.22                 | 17.76         | 1909.98                 | 21.73         | 2496.94                 | 16.85         |
| 1819.84                 | 21.06         | 2786.76                 | 39.32         | 1910.05                 | 20.85         | 2504.15                 | 24.23         |
| 1823.21                 | 27.11         | 2788.79                 | 45.38         | 1910.63                 | 17.97         | 2507.41                 | 16.83         |
| 1823.52                 | 39.93         | 2852.10                 | 41.86         | 1911.26                 | 17.95         | 2508.19                 | 20.86         |
| 1832.66                 | 34.08         | 2857.65                 | 64.97         | 1911.85                 | 27.82         | 2508.42                 | 19.35         |
| 1834.46                 | 29.71         | 2895.82                 | 61.82         | 1912.12                 | 17.95         | 2509.19                 | 33.31         |
| 1835.73                 | 49.29         | 2943.88                 | 16.48         | 1912.88                 | 28.93         | 2517.89                 | 35.63         |
| 1837.29                 | 41.75         | 2989.27                 | 35.40         | 1913.83                 | 17.95         | 2518.73                 | 16.80         |
| 1838.21                 | 30.43         | 3087.87                 | 46.92         | 1914.08                 | 29.79         | 2518.82                 | 20.17         |
| 1842.11                 | 28.78         | 3091.78                 | 15.95         | 1914.18                 | 29.58         | 2527.23                 | 16.79         |
| 1842.52                 | 40.48         | 3163.09                 | 44.58         | 1917.06                 | 17.94         | 2536.63                 | 42.28         |
| 1850.11                 | 35.26         | 3245.56                 | 18.59         | 1918.16                 | 21.00         | 2550.11                 | 36.18         |
| 1856.99                 | 35.24         | 1838.73                 | 24.26         | 1920.23                 | 17.93         | 2572.40                 | 19.39         |
| 1863.47                 | 25.45         | 1849.36                 | 29.32         | 1920.52                 | 22.07         | 2579.32                 | 17.88         |
| 1870.38                 | 19.34         | 1867.14                 | 18.06         | 1921.64                 | 17.95         | 2772.61                 | 56.02         |
| 1873.74                 | 28.77         | 1867.55                 | 38.99         | 1922.90                 | 17.94         | 2949.24                 | 31.81         |
| 1878.73                 | 23.99         | 1868.77                 | 20.06         | 1925.18                 | 22.95         | 3318.85                 | 18.81         |
| 1885.14                 | 18.01         | 1870.19                 | 18.07         | 1927.04                 | 30.11         | 1776.72                 | 18.26         |
| 1885.76                 | 18.01         | 1870.99                 | 27.25         | 1928.62                 | 18.02         | 1791.02                 | 18.23         |
| 1887.76                 | 20.88         | 1871.84                 | 27.38         | 1928.78                 | 18.68         | 1794.83                 | 18.49         |
| 1888.02                 | 18.02         | 1874.59                 | 18.03         | 1930.50                 | 31.88         | 1798.53                 | 18.20         |
| 1890.70                 | 18.06         | 1875.91                 | 39.84         | 1939.47                 | 25.97         | 1801.71                 | 18.19         |

| Zircon U-Pb Age<br>(Ma) | Error<br>(Ma) |
|-------------------------|---------------|-------------------------|---------------|-------------------------|---------------|-------------------------|---------------|
| 1805.07                 | 18.18         | 1914.44                 | 29.97         | 2286.15                 | 41.31         | 1788.50                 | 21.33         |
| 1805.62                 | 18.22         | 1914.44                 | 21.71         | 2313.16                 | 21.79         | 1790.50                 | 18.22         |
| 1809.88                 | 26.35         | 1914.93                 | 32.12         | 2333.64                 | 17.13         | 1793.60                 | 18.28         |
| 1813.59                 | 23.25         | 1915.03                 | 17.94         | 2338.03                 | 17.11         | 1795.46                 | 50.45         |
| 1816.42                 | 18.16         | 1915.27                 | 19.38         | 2342.28                 | 20.19         | 1804.33                 | 34.74         |
| 1821.88                 | 28.67         | 1915.47                 | 17.94         | 2357.18                 | 17.09         | 1805.90                 | 23.12         |
| 1826.26                 | 39.22         | 1916.41                 | 21.57         | 2373.11                 | 18.25         | 1808.02                 | 36.74         |
| 1826.61                 | 27.63         | 1916.76                 | 25.89         | 2376.50                 | 56.78         | 1810.32                 | 35.87         |
| 1826.62                 | 47.93         | 1917.80                 | 18.88         | 2387.80                 | 17.04         | 1814.11                 | 34.15         |
| 1833.08                 | 21.76         | 1918.37                 | 17.94         | 2390.64                 | 17.03         | 1817.09                 | 44.85         |
| 1833.15                 | 22.29         | 1919.02                 | 18.83         | 2409.47                 | 25.48         | 1837.48                 | 26.30         |
| 1842.35                 | 18.14         | 1919.18                 | 17.94         | 2464.57                 | 17.05         | 1856.81                 | 19.72         |
| 1847.89                 | 25.60         | 1919.81                 | 35.69         | 2487.55                 | 32.70         | 1866.05                 | 34.13         |
| 1853.69                 | 23.94         | 1919.90                 | 26.38         | 2497.35                 | 38.73         | 1867.35                 | 18.05         |
| 1854.24                 | 18.09         | 1920.02                 | 17.93         | 2498.58                 | 30.64         | 1876.97                 | 22.00         |
| 1856.44                 | 47.53         | 1920.10                 | 23.67         | 2503.33                 | 16.83         | 1892.38                 | 70.74         |
| 1864.41                 | 21.66         | 1920.35                 | 18.01         | 2503.35                 | 19.02         | 1892.53                 | 22.50         |
| 1867.72                 | 24.48         | 1920.69                 | 29.59         | 2518.81                 | 20.00         | 1899.92                 | 41.22         |
| 1872.67                 | 21.28         | 1921.51                 | 26.90         | 2522.12                 | 34.59         | 1904.21                 | 29.33         |
| 1873.95                 | 18.03         | 1922.37                 | 17.93         | 2523.43                 | 41.69         | 1969.31                 | 17.83         |
| 1875.20                 | 31.73         | 1922.66                 | 21.54         | 2523.85                 | 23.18         | 2001.26                 | 25.05         |
| 1875.86                 | 22.36         | 1923.64                 | 33.34         | 2524.83                 | 23.51         | 2021.95                 | 21.44         |
| 1881.29                 | 32.25         | 1924.04                 | 20.63         | 2529.15                 | 17.29         | 2035.12                 | 18.22         |
| 1884.68                 | 22.71         | 1926.76                 | 21.15         | 2534.70                 | 23.49         | 2046.05                 | 22.97         |
| 1886.16                 | 18.01         | 1927.36                 | 38.52         | 2538.39                 | 31.70         | 2136.96                 | 29.04         |
| 1891.88                 | 28.11         | 1927.71                 | 17.94         | 2541.71                 | 16.77         | 2168.28                 | 18.65         |
| 1892.38                 | 22.68         | 1930.77                 | 21.69         | 2554.22                 | 21.79         | 2219.73                 | 27.91         |
| 1893.57                 | 20.37         | 1931.14                 | 23.64         | 2558.94                 | 20.60         | 2230.25                 | 37.57         |
| 1893.70                 | 18.02         | 1931.67                 | 19.34         | 2562.76                 | 16.74         | 2258.71                 | 41.95         |
| 1895.85                 | 22.67         | 1934.27                 | 21.49         | 2563.77                 | 21.91         | 2296.66                 | 17.56         |
| 1896.52                 | 28.43         | 1934.29                 | 21.87         | 2569.02                 | 18.56         | 2375.37                 | 17.05         |
| 1898.42                 | 17.98         | 1934.91                 | 17.95         | 2574.45                 | 26.74         | 2388.81                 | 27.94         |
| 1898.83                 | 39.56         | 1935.92                 | 20.96         | 2576.48                 | 19.40         | 2401.24                 | 26.36         |
| 1899.75                 | 17.98         | 1937.28                 | 29.00         | 2576.95                 | 16.71         | 2491.47                 | 25.78         |
| 1899.78                 | 27.22         | 1937.66                 | 21.30         | 2577.91                 | 26.73         | 2523.52                 | 70.06         |
| 1900.01                 | 26.28         | 1938.61                 | 17.89         | 2586.58                 | 16.73         | 2537.78                 | 54.87         |
| 1900.14                 | 25.17         | 1943.01                 | 17.89         | 2589.22                 | 41.56         | 2545.89                 | 24.63         |
| 1900.92                 | 23.55         | 1945.43                 | 40.12         | 2599.76                 | 19.50         | 2560.58                 | 18.91         |
| 1901.02                 | 18.02         | 1956.25                 | 33.58         | 2601.60                 | 22.51         | 2573.56                 | 33.09         |
| 1901.52                 | 17.98         | 1965.87                 | 17.84         | 2601.84                 | 17.95         | 2607.05                 | 33.82         |
| 1902.20                 | 17.98         | 1972.59                 | 27.49         | 2669.28                 | 16.57         | 2622.39                 | 19.30         |
| 1902.50                 | 27.50         | 1981.65                 | 18.87         | 2718.52                 | 21.43         | 2646.96                 | 33.88         |
| 1902.57                 | 21.94         | 1988.60                 | 17.79         | 2718.78                 | 16.48         | 2647.70                 | 54.44         |
| 1903.39                 | 17.97         | 1996.21                 | 51.26         | 2721.91                 | 24.88         | 2676.99                 | 51.33         |
| 1904.91                 | 17.97         | 2003.13                 | 17.76         | 2945.86                 | 24.39         | 2738.09                 | 27.82         |
| 1905.44                 | 18.33         | 2011.11                 | 17.95         | 3293.80                 | 15.69         | 2781.34                 | 22.94         |
| 1905.64                 | 17.96         | 2027.79                 | 20.37         | 3389.23                 | 16.98         | 2904.09                 | 19.78         |
| 1906.89                 | 17.97         | 2030.68                 | 17.70         | 1749.79                 | 33.61         | 2906.82                 | 26.42         |
| 1907.03                 | 17.97         | 2048.54                 | 29.15         | 1762.65                 | 22.68         | 2946.00                 | 16.15         |
| 1907.39                 | 17.98         | 2059.71                 | 17.67         | 1764.71                 | 29.62         | 2947.22                 | 16.15         |
| 1907.75                 | 18.50         | 2083.37                 | 24.29         | 1767.02                 | 18.28         | 2955.51                 | 17.11         |
| 1907.90                 | 18.32         | 2109.48                 | 24.57         | 1769.49                 | 31.46         | 2962.47                 | 18.54         |
| 1907.97                 | 21.92         | 2124.29                 | 45.72         | 1770.22                 | 24.11         | 2997.53                 | 32.80         |
| 1908.38                 | 32.43         | 2126.76                 | 39.58         | 1773.19                 | 35.24         | 3005.14                 | 29.09         |
| 1908.84                 | 20.11         | 2129.23                 | 34.49         | 1773.62                 | 18.28         | 3006.29                 | 18.80         |
| 1910.43                 | 19.03         | 2134.91                 | 31.67         | 1776.11                 | 33.49         | 3007.81                 | 46.92         |
| 1910.53                 | 17.96         | 2165.53                 | 26.68         | 1778.81                 | 27.59         | 3011.09                 | 65.56         |
| 1910.64                 | 20.30         | 2185.00                 | 47.68         | 1780.29                 | 25.00         | 3015.18                 | 37.89         |
| 1910.85                 | 17.98         | 2204.08                 | 34.07         | 1783.51                 | 26.44         | 3021.96                 | 24.87         |
| 1911.57                 | 17.95         | 2209.29                 | 37.51         | 1783.52                 | 21.88         | 3036.20                 | 16.02         |
| 1911.86                 | 27.86         | 2219.39                 | 19.26         | 1786.41                 | 19.87         | 3041.12                 | 24.03         |
| 1912.49                 | 17.95         | 2230.20                 | 26.52         | 1787.24                 | 18.23         | 3047.20                 | 28.98         |
| 1913.45                 | 18.20         | 2245.23                 | 22.35         | 1787.31                 | 22.06         | 3047.73                 | 29.78         |
| 1913.70                 | 17.95         | 2247.86                 | 21.10         | 1787.98                 | 33.54         | 3050.87                 | 16.00         |
| 1913.72                 | 24.41         | 2257.19                 | 50.76         | 1788.15                 | 22.61         | 3069.96                 | 41.07         |

| Zircon U-Pb Age<br>(Ma) | Error<br>(Ma) | Zircon U-Pb Age<br>(Ma)                       | Error<br>(Ma) |
|-------------------------|---------------|-----------------------------------------------|---------------|
| 3101.06                 | 15.94         | 2042.90                                       | 31.10         |
| 3102.51                 | 19.60         | 2047.70                                       | 26.30         |
| 3103.36                 | 24.24         | 2047.70                                       | 48.20         |
| 3114.61                 | 15.92         | 2048.40                                       | 57.40         |
| 3123.94                 | 17.82         | 2052.80                                       | 48.40         |
| 3144.91                 | 34.48         | 2089.40                                       | 44.80         |
| 3180.66                 | 27.09         | 2089.90                                       | 34.80         |
| 3184.56                 | 15.83         | 2099.40                                       | 52.90         |
| 3352.31                 | 23.90         | 2153.10                                       | 19.40         |
| 1811.60                 | 25.40         | 2157.40                                       | 33.00         |
| 1821.70                 | 71.00         | 2162.70                                       | 34.00         |
| 1823.70                 | 67.90         | 2183.30                                       | 72.20         |
| 1825.10                 | 45.50         | 2184.10                                       | 42.30         |
| 1832.70                 | 45.70         | 2268.20                                       | 38.30         |
| 1841.00                 | 21.40         | 2269.50                                       | 31.70         |
| 1843.10                 | 40.20         | 2312.80                                       | 29.90         |
| 1844.60                 | 63.90         | 2313.20                                       | 42.60         |
| 1855.50                 | 44.50         | 2354.30                                       | 30.90         |
| 1860.10                 | 38.50         | 2373.10                                       | 43.80         |
| 1862.20                 | 37.20         | 2384.10                                       | 87.30         |
| 1863.80                 | 39.00         | 2433.60                                       | 43.60         |
| 1878.10                 | 45.40         | 2478.10                                       | 27.20         |
| 1878.40                 | 30.50         | 2499.20                                       | 44.60         |
| 1883.00                 | 30.60         | 2501.00                                       | 31.50         |
| 1884.30                 | 48.50         | 2503.80                                       | 16.80         |
| 1887.20                 | 37.10         | 2508.60                                       | 54.00         |
| 1899.30                 | 50.70         | 2513.90                                       | 36.70         |
| 1901.00                 | 42.10         | 2516.00                                       | 50.80         |
| 1901.30                 | 28.20         | 2524.70                                       | 71.20         |
| 1904.90                 | 18.90         | 2527.80                                       | 21.30         |
| 1905.90                 | 35.70         | 2551.70                                       | 16.80         |
| 1907.90                 | 21.50         | 2558.40                                       | 64.10         |
| 1911.60                 | 42.90         | 2574.60                                       | 45.50         |
| 1915.70                 | 17.90         | 2593.70                                       | 66.90         |
| 1917.10                 | 40.90         | 2611.10                                       | 22.50         |
| 1922.70                 | 36.80         | 2642.60                                       | 26.10         |
| 1927.50                 | 38.30         | 2685.80                                       | 31.60         |
| 1933.40                 | 38.90         | 2689.20                                       | 43.60         |
| 1934.60                 | 43.70         | 2689.20                                       | 39.30         |
| 1936.20                 | 32.00         | 2701.50                                       | 19.10         |
| 1940.40                 | 55.80         | 2702.90                                       | 20.30         |
| 1941.40                 | 31.80         | 2716.00                                       | 32.00         |
| 1947.00                 | 32.00         | 2748.00                                       | 43.80         |
| 1948.60                 | 88.70         | 2773.90                                       | 49.50         |
| 1952.80                 | 36.40         | 3268.70                                       | 36.60         |
| 1955.20                 | 33.80         | *All Data compiled by Gehrels<br>et al., 2011 |               |
| 1955.90                 | 25.20         |                                               |               |
| 1959.70                 | 23.00         |                                               |               |
| 1971.30                 | 49.00         |                                               |               |
| 1971.50                 | 62.60         |                                               |               |
| 1973.10                 | 52.20         |                                               |               |
| 1976.20                 | 30.10         |                                               |               |
| 1977.20                 | 28.50         |                                               |               |
| 1978.70                 | 24.20         |                                               |               |
| 1978.90                 | 52.70         |                                               |               |
| 1981.00                 | 45.20         |                                               |               |
| 1984.50                 | 31.90         |                                               |               |
| 1991.60                 | 31.70         |                                               |               |
| 2000.90                 | 27.20         |                                               |               |
| 2003.70                 | 102.50        |                                               |               |
| 2007.40                 | 41.50         |                                               |               |
| 2007.50                 | 39.20         |                                               |               |
| 2012.30                 | 35.10         |                                               |               |
| 2024.60                 | 33.70         |                                               |               |
| 2028.40                 | 43.70         |                                               |               |

**Table DR9. Compiled Zircon U-Pb Ages of Tectonic Blocks (Greater Himalaya-Nepal) \***

|                         |       | Zircon U-Pb Age<br>(Ma) | Error<br>(Ma) | Zircon U-Pb Age<br>(Ma) | Error<br>(Ma) | Zircon U-Pb Age<br>(Ma) | Error<br>(Ma) |
|-------------------------|-------|-------------------------|---------------|-------------------------|---------------|-------------------------|---------------|
| Zircon U-Pb Age<br>(Ma) |       |                         |               |                         |               |                         |               |
| 967.00                  | 2.30  | 1401.00                 | 21.00         | 1091.00                 | 4.00          | 2738.00                 | 3.00          |
| 1710.00                 | 1.50  | 1460.00                 | 7.00          | 1092.00                 | 30.00         | 2744.00                 | 6.00          |
| 1180.70                 | 1.40  | 1468.00                 | 20.00         | 1093.00                 | 72.00         | 2768.00                 | 3.00          |
| 971.20                  | 1.40  | 1511.00                 | 6.00          | 1113.00                 | 19.00         | 2834.00                 | 4.00          |
| 1441.20                 | 1.40  | 1511.00                 | 19.00         | 1113.00                 | 5.00          | 2920.00                 | 15.00         |
| 710.00                  | 9.00  | 1517.00                 | 19.00         | 1114.00                 | 37.00         | 2953.00                 | 8.00          |
| 715.00                  | 9.00  | 1556.00                 | 6.00          | 1120.00                 | 5.00          | 2977.00                 | 6.00          |
| 770.00                  | 29.00 | 1573.00                 | 19.00         | 1126.00                 | 5.00          | 3051.00                 | 7.00          |
| 864.00                  | 25.00 | 1607.00                 | 20.00         | 1141.00                 | 15.00         | 3212.00                 | 9.00          |
| 870.00                  | 49.00 | 1621.00                 | 12.00         | 1152.00                 | 11.00         | 3221.00                 | 7.00          |
| 873.00                  | 23.00 | 1662.00                 | 64.00         | 1154.00                 | 32.00         | 3446.00                 | 11.00         |
| 884.00                  | 21.00 | 1666.00                 | 21.00         | 1155.00                 | 57.00         | 3457.00                 | 5.00          |
| 895.00                  | 22.00 | 1666.00                 | 19.00         | 1166.00                 | 28.00         | 557.00                  | 10.00         |
| 900.00                  | 22.00 | 1745.00                 | 19.00         | 1176.00                 | 3.00          | 617.00                  | 8.00          |
| 936.00                  | 21.00 | 1754.00                 | 12.00         | 1188.00                 | 10.00         | 641.00                  | 4.00          |
| 955.00                  | 21.00 | 1762.00                 | 5.00          | 1198.00                 | 9.00          | 722.00                  | 6.00          |
| 970.00                  | 31.00 | 1777.00                 | 8.00          | 1218.00                 | 11.00         | 746.00                  | 4.00          |
| 972.00                  | 23.00 | 1791.00                 | 19.00         | 1220.00                 | 4.00          | 780.00                  | 6.00          |
| 976.00                  | 10.00 | 1814.00                 | 33.00         | 1220.00                 | 3.00          | 786.00                  | 5.00          |
| 976.00                  | 11.00 | 1914.00                 | 7.00          | 1256.00                 | 6.00          | 789.00                  | 7.00          |
| 977.00                  | 83.00 | 2062.00                 | 3.00          | 1261.00                 | 13.00         | 795.00                  | 6.00          |
| 981.00                  | 13.00 | 2359.00                 | 4.00          | 1269.00                 | 36.00         | 916.00                  | 5.00          |
| 982.00                  | 21.00 | 2441.00                 | 5.00          | 1271.00                 | 37.00         | 954.00                  | 12.00         |
| 988.00                  | 69.00 | 2456.00                 | 17.00         | 1274.00                 | 11.00         | 967.00                  | 6.00          |
| 1011.00                 | 21.00 | 2469.00                 | 3.00          | 1292.00                 | 10.00         | 986.00                  | 4.00          |
| 1015.00                 | 20.00 | 2481.00                 | 10.00         | 1316.00                 | 4.00          | 1002.00                 | 7.00          |
| 1017.00                 | 17.00 | 2521.00                 | 17.00         | 1323.00                 | 18.00         | 1016.00                 | 29.00         |
| 1028.00                 | 22.00 | 2528.00                 | 6.00          | 1328.00                 | 14.00         | 1018.00                 | 22.00         |
| 1036.00                 | 25.00 | 2537.00                 | 17.00         | 1415.00                 | 52.00         | 1031.00                 | 4.00          |
| 1037.00                 | 20.00 | 2539.00                 | 17.00         | 1440.00                 | 30.00         | 1033.00                 | 5.00          |
| 1044.00                 | 20.00 | 2542.00                 | 17.00         | 1497.00                 | 5.00          | 1054.00                 | 6.00          |
| 1045.00                 | 29.00 | 2543.00                 | 17.00         | 1539.00                 | 15.00         | 1064.00                 | 6.00          |
| 1068.00                 | 21.00 | 2591.00                 | 17.00         | 1549.00                 | 4.00          | 1065.00                 | 4.00          |
| 1085.00                 | 20.00 | 2620.00                 | 1.00          | 1551.00                 | 9.00          | 1066.00                 | 6.00          |
| 1085.00                 | 17.00 | 2639.00                 | 2.00          | 1594.00                 | 4.00          | 1070.00                 | 12.00         |
| 1090.00                 | 12.00 | 2646.00                 | 2.00          | 1610.00                 | 13.00         | 1074.00                 | 19.00         |
| 1100.00                 | 28.00 | 2648.00                 | 24.00         | 1657.00                 | 4.00          | 1075.00                 | 16.00         |
| 1113.00                 | 45.00 | 2707.00                 | 6.00          | 1707.00                 | 11.00         | 1076.00                 | 5.00          |
| 1114.00                 | 13.00 | 2749.00                 | 1.00          | 1707.00                 | 4.00          | 1079.00                 | 4.00          |
| 1137.00                 | 5.00  | 2771.00                 | 2.00          | 1782.00                 | 12.00         | 1079.00                 | 4.00          |
| 1137.00                 | 20.00 | 2960.00                 | 16.00         | 1900.00                 | 5.00          | 1087.00                 | 6.00          |
| 1137.00                 | 15.00 | 3175.00                 | 16.00         | 1905.00                 | 5.00          | 1090.00                 | 5.00          |
| 1138.00                 | 20.00 | 3308.00                 | 3.00          | 2017.00                 | 9.00          | 1090.00                 | 6.00          |
| 1164.00                 | 28.00 | 3463.00                 | 16.00         | 2072.00                 | 6.00          | 1094.00                 | 12.00         |
| 1167.00                 | 20.00 | 3499.00                 | 2.00          | 2109.00                 | 7.00          | 1101.00                 | 13.00         |
| 1169.00                 | 24.00 | 3976.00                 | 15.00         | 2199.00                 | 11.00         | 1105.00                 | 34.00         |
| 1177.00                 | 25.00 | 900.00                  | 16.00         | 2319.00                 | 13.00         | 1111.00                 | 5.00          |
| 1179.00                 | 15.00 | 913.00                  | 66.00         | 2388.00                 | 6.00          | 1112.00                 | 6.00          |
| 1181.00                 | 24.00 | 946.00                  | 4.00          | 2412.00                 | 8.00          | 1119.00                 | 10.00         |
| 1199.00                 | 23.00 | 989.00                  | 4.00          | 2439.00                 | 12.00         | 1121.00                 | 8.00          |
| 1203.00                 | 21.00 | 989.00                  | 20.00         | 2441.00                 | 13.00         | 1125.00                 | 8.00          |
| 1208.00                 | 25.00 | 1005.00                 | 15.00         | 2451.00                 | 5.00          | 1127.00                 | 7.00          |
| 1209.00                 | 8.00  | 1007.00                 | 27.00         | 2471.00                 | 4.00          | 1148.00                 | 8.00          |
| 1215.00                 | 25.00 | 1019.00                 | 5.00          | 2488.00                 | 5.00          | 1174.00                 | 5.00          |
| 1222.00                 | 24.00 | 1027.00                 | 95.00         | 2510.00                 | 5.00          | 1176.00                 | 8.00          |
| 1226.00                 | 11.00 | 1030.00                 | 4.00          | 2520.00                 | 6.00          | 1178.00                 | 4.00          |
| 1261.00                 | 21.00 | 1034.00                 | 24.00         | 2532.00                 | 5.00          | 1178.00                 | 7.00          |
| 1293.00                 | 4.00  | 1036.00                 | 32.00         | 2534.00                 | 5.00          | 1182.00                 | 6.00          |
| 1301.00                 | 7.00  | 1049.00                 | 4.00          | 2551.00                 | 4.00          | 1184.00                 | 14.00         |
| 1314.00                 | 50.00 | 1052.00                 | 19.00         | 2560.00                 | 4.00          | 1185.00                 | 10.00         |
| 1383.00                 | 20.00 | 1057.00                 | 4.00          | 2615.00                 | 6.00          | 1200.00                 | 6.00          |
|                         |       | 1061.00                 | 7.00          | 2632.00                 | 3.00          | 1203.00                 | 7.00          |
|                         |       | 1073.00                 | 15.00         | 2640.00                 | 4.00          | 1203.00                 | 7.00          |
|                         |       | 1089.00                 | 22.00         | 2641.00                 | 6.00          | 1214.00                 | 5.00          |
|                         |       | 1089.00                 | 18.00         | 2695.00                 | 16.00         | 1246.00                 | 8.00          |



| Zircon U-Pb Age<br>(Ma) | Error<br>(Ma) |
|-------------------------|---------------|-------------------------|---------------|-------------------------|---------------|-------------------------|---------------|
| 1272.00                 | 16.00         | 1002.00                 | 14.00         | 1125.00                 | 31.00         | 1102.00                 | 13.00         |
| 1274.00                 | 16.00         | 1019.00                 | 34.00         | 1128.00                 | 13.00         | 1109.00                 | 28.00         |
| 1295.00                 | 10.00         | 1023.00                 | 8.00          | 1202.00                 | 4.00          | 1114.00                 | 21.00         |
| 1327.00                 | 9.00          | 1027.00                 | 18.00         | 1208.00                 | 28.00         | 1121.00                 | 40.00         |
| 1376.00                 | 8.00          | 1027.00                 | 23.00         | 1233.00                 | 10.00         | 1126.00                 | 25.00         |
| 1474.00                 | 5.00          | 1047.00                 | 22.00         | 1417.00                 | 26.00         | 1129.00                 | 21.00         |
| 1562.00                 | 5.00          | 1060.00                 | 35.00         | 1433.00                 | 5.00          | 1129.00                 | 27.00         |
| 1672.00                 | 6.00          | 1060.00                 | 20.00         | 1467.00                 | 14.00         | 1130.00                 | 8.00          |
| 1693.00                 | 4.00          | 1140.00                 | 15.00         | 1613.00                 | 13.00         | 1136.00                 | 17.00         |
| 1723.00                 | 6.00          | 1178.00                 | 17.00         | 1691.00                 | 12.00         | 1137.00                 | 16.00         |
| 1787.00                 | 5.00          | 1321.00                 | 23.00         | 1751.00                 | 20.00         | 1143.00                 | 14.00         |
| 1824.00                 | 8.00          | 1394.00                 | 21.00         | 1807.00                 | 11.00         | 1149.00                 | 16.00         |
| 1981.00                 | 6.00          | 1485.00                 | 26.00         | 1851.00                 | 35.00         | 1166.00                 | 23.00         |
| 2141.00                 | 6.00          | 1518.00                 | 49.00         | 1855.00                 | 20.00         | 1174.00                 | 20.00         |
| 2252.00                 | 5.00          | 1554.00                 | 8.00          | 1870.00                 | 11.00         | 1191.00                 | 15.00         |
| 2481.00                 | 4.00          | 1589.00                 | 6.00          | 1905.00                 | 7.00          | 1208.00                 | 20.00         |
| 2511.00                 | 5.00          | 1595.00                 | 16.00         | 2014.00                 | 1.00          | 1210.00                 | 25.00         |
| 2513.00                 | 6.00          | 1609.00                 | 38.00         | 2028.00                 | 18.00         | 1225.00                 | 22.00         |
| 2519.00                 | 5.00          | 1630.00                 | 44.00         | 2341.00                 | 14.00         | 1233.00                 | 28.00         |
| 2522.00                 | 4.00          | 1641.00                 | 5.00          | 2384.00                 | 17.00         | 1289.00                 | 28.00         |
| 2543.00                 | 5.00          | 1663.00                 | 80.00         | 2489.00                 | 17.00         | 1357.00                 | 16.00         |
| 2569.00                 | 8.00          | 1664.00                 | 13.00         | 2497.00                 | 95.00         | 1438.00                 | 32.00         |
| 2574.00                 | 5.00          | 1669.00                 | 12.00         | 2501.00                 | 9.00          | 1469.00                 | 33.00         |
| 2582.00                 | 6.00          | 1682.00                 | 81.00         | 2511.00                 | 11.00         | 1674.00                 | 9.00          |
| 2592.00                 | 4.00          | 1698.00                 | 28.00         | 2625.00                 | 20.00         | 1739.00                 | 25.00         |
| 2593.00                 | 5.00          | 1706.00                 | 29.00         | 2632.00                 | 15.00         | 1810.00                 | 24.00         |
| 2601.00                 | 5.00          | 1747.00                 | 9.00          | 2643.00                 | 5.00          | 1817.00                 | 23.00         |
| 2625.00                 | 8.00          | 1759.00                 | 4.00          | 2662.00                 | 7.00          | 1846.00                 | 22.00         |
| 2627.00                 | 6.00          | 1807.00                 | 8.00          | 2735.00                 | 10.00         | 1902.00                 | 29.00         |
| 2632.00                 | 5.00          | 1843.00                 | 6.00          | 3277.00                 | 7.00          | 2144.00                 | 23.00         |
| 2655.00                 | 5.00          | 1853.00                 | 8.00          | 581.00                  | 7.00          | 2160.00                 | 25.00         |
| 2668.00                 | 6.00          | 2403.00                 | 11.00         | 644.00                  | 4.00          | 2387.00                 | 20.00         |
| 2681.00                 | 5.00          | 2413.00                 | 5.00          | 649.00                  | 6.00          | 2483.00                 | 3.00          |
| 2790.00                 | 6.00          | 2422.00                 | 4.00          | 712.00                  | 7.00          | 2498.00                 | 22.00         |
| 2842.00                 | 3.00          | 2449.00                 | 18.00         | 742.00                  | 10.00         | 2733.00                 | 20.00         |
| 2875.00                 | 5.00          | 2483.00                 | 8.00          | 876.00                  | 34.00         | 3361.00                 | 8.00          |
| 3145.00                 | 3.00          | 2533.00                 | 30.00         | 884.00                  | 29.00         | 541.00                  | 5.00          |
| 3280.00                 | 4.00          | 2685.00                 | 19.00         | 892.00                  | 16.00         | 542.00                  | 2.00          |
| 3320.00                 | 4.00          | 2911.00                 | 14.00         | 899.00                  | 8.00          | 545.00                  | 4.00          |
| 3533.00                 | 2.00          | 592.00                  | 4.00          | 917.00                  | 20.00         | 548.00                  | 7.00          |
| 4082.00                 | 6.00          | 649.00                  | 13.00         | 934.00                  | 58.00         | 551.00                  | 6.00          |
| 651.00                  | 16.00         | 686.00                  | 11.00         | 964.00                  | 25.00         | 563.00                  | 27.00         |
| 656.00                  | 19.00         | 710.00                  | 6.00          | 976.00                  | 19.00         | 567.00                  | 13.00         |
| 818.00                  | 34.00         | 711.00                  | 12.00         | 1003.00                 | 26.00         | 577.00                  | 13.00         |
| 846.00                  | 23.00         | 721.00                  | 9.00          | 1007.00                 | 13.00         | 626.00                  | 3.00          |
| 848.00                  | 25.00         | 737.00                  | 9.00          | 1015.00                 | 43.00         | 637.00                  | 15.00         |
| 870.00                  | 35.00         | 740.00                  | 11.00         | 1015.00                 | 40.00         | 653.00                  | 22.00         |
| 870.00                  | 39.00         | 768.00                  | 19.00         | 1019.00                 | 20.00         | 687.00                  | 12.00         |
| 879.00                  | 18.00         | 772.00                  | 16.00         | 1023.00                 | 20.00         | 831.00                  | 30.00         |
| 887.00                  | 11.00         | 777.00                  | 21.00         | 1030.00                 | 18.00         | 875.00                  | 36.00         |
| 888.00                  | 17.00         | 789.00                  | 15.00         | 1039.00                 | 15.00         | 880.00                  | 48.00         |
| 895.00                  | 7.00          | 807.00                  | 13.00         | 1040.00                 | 24.00         | 887.00                  | 53.00         |
| 910.00                  | 7.00          | 814.00                  | 26.00         | 1041.00                 | 16.00         | 895.00                  | 39.00         |
| 910.00                  | 8.00          | 838.00                  | 7.00          | 1041.00                 | 16.00         | 898.00                  | 10.00         |
| 916.00                  | 19.00         | 840.00                  | 7.00          | 1043.00                 | 21.00         | 899.00                  | 48.00         |
| 925.00                  | 7.00          | 862.00                  | 15.00         | 1045.00                 | 23.00         | 903.00                  | 27.00         |
| 925.00                  | 30.00         | 915.00                  | 8.00          | 1048.00                 | 19.00         | 914.00                  | 42.00         |
| 930.00                  | 13.00         | 919.00                  | 12.00         | 1064.00                 | 52.00         | 920.00                  | 40.00         |
| 950.00                  | 33.00         | 935.00                  | 19.00         | 1065.00                 | 24.00         | 933.00                  | 31.00         |
| 950.00                  | 19.00         | 955.00                  | 20.00         | 1065.00                 | 23.00         | 934.00                  | 33.00         |
| 953.00                  | 35.00         | 962.00                  | 37.00         | 1077.00                 | 23.00         | 942.00                  | 36.00         |
| 959.00                  | 13.00         | 979.00                  | 38.00         | 1078.00                 | 25.00         | 945.00                  | 17.00         |
| 974.00                  | 21.00         | 981.00                  | 16.00         | 1088.00                 | 17.00         | 948.00                  | 52.00         |
| 982.00                  | 43.00         | 1002.00                 | 32.00         | 1092.00                 | 25.00         | 958.00                  | 36.00         |
| 986.00                  | 30.00         | 1008.00                 | 19.00         | 1099.00                 | 10.00         | 960.00                  | 31.00         |

| Zircon U-Pb Age<br>(Ma) | Error<br>(Ma) |
|-------------------------|---------------|-------------------------|---------------|-------------------------|---------------|-------------------------|---------------|
| 964.00                  | 40.00         | 1732.00                 | 23.00         | 1641.00                 | 13.00         | 1829.00                 | 2.00          |
| 968.00                  | 7.00          | 1735.00                 | 17.00         | 1641.00                 | 15.00         | 1869.00                 | 8.00          |
| 973.00                  | 9.00          | 1817.00                 | 14.00         | 1652.00                 | 10.00         | 1880.00                 | 10.00         |
| 979.00                  | 13.00         | 1831.00                 | 26.00         | 1653.00                 | 12.00         | 1908.00                 | 2.00          |
| 981.00                  | 19.00         | 1832.00                 | 7.00          | 1664.00                 | 8.00          | 2158.00                 | 3.00          |
| 987.00                  | 35.00         | 1920.00                 | 6.00          | 1667.00                 | 19.00         | 2238.00                 | 5.00          |
| 994.00                  | 46.00         | 1923.00                 | 16.00         | 1673.00                 | 14.00         | 2254.00                 | 7.00          |
| 997.00                  | 38.00         | 2187.00                 | 21.00         | 1690.00                 | 5.00          | 2526.00                 | 3.00          |
| 1005.00                 | 23.00         | 2235.00                 | 7.00          | 1696.00                 | 8.00          | 2552.00                 | 1.00          |
| 1022.00                 | 17.00         | 2277.00                 | 33.00         | 1715.00                 | 8.00          | 2553.00                 | 6.00          |
| 1028.00                 | 39.00         | 2279.00                 | 3.00          | 1752.00                 | 19.00         | 2562.00                 | 2.00          |
| 1030.00                 | 13.00         | 2308.00                 | 16.00         | 1787.00                 | 18.00         | 2579.00                 | 11.00         |
| 1032.00                 | 7.00          | 2322.00                 | 10.00         | 1889.00                 | 16.00         | 2618.00                 | 3.00          |
| 1039.00                 | 18.00         | 2342.00                 | 31.00         | 2407.00                 | 26.00         | 2667.00                 | 3.00          |
| 1042.00                 | 53.00         | 2385.00                 | 9.00          | 2426.00                 | 11.00         | 2731.00                 | 3.00          |
| 1043.00                 | 17.00         | 2405.00                 | 5.00          | 2435.00                 | 18.00         | 2822.00                 | 2.00          |
| 1043.00                 | 34.00         | 2405.00                 | 5.00          | 2455.00                 | 6.00          | 1008.11                 | 47.33         |
| 1044.00                 | 26.00         | 2407.00                 | 11.00         | 2456.00                 | 18.00         | 1030.40                 | 51.93         |
| 1045.00                 | 39.00         | 2471.00                 | 6.00          | 2478.00                 | 3.00          | 1155.04                 | 195.98        |
| 1049.00                 | 22.00         | 2548.00                 | 2.00          | 2486.00                 | 7.00          | 1193.53                 | 43.00         |
| 1049.00                 | 43.00         | 2624.00                 | 1.00          | 2496.00                 | 22.00         | 1211.61                 | 96.15         |
| 1050.00                 | 55.00         | 2774.00                 | 39.00         | 2517.00                 | 11.00         | 1217.98                 | 36.72         |
| 1059.00                 | 13.00         | 2777.00                 | 6.00          | 2527.00                 | 32.00         | 1234.39                 | 25.61         |
| 1065.00                 | 26.00         | 2805.00                 | 8.00          | 2536.00                 | 23.00         | 1244.37                 | 54.12         |
| 1096.00                 | 43.00         | 2834.00                 | 9.00          | 2541.00                 | 21.00         | 1300.01                 | 59.15         |
| 1096.00                 | 45.00         | 2852.00                 | 6.00          | 2544.00                 | 12.00         | 1316.48                 | 51.50         |
| 1105.00                 | 28.00         | 3034.00                 | 17.00         | 2549.00                 | 6.00          | 1356.86                 | 171.62        |
| 1108.00                 | 24.00         | 3081.00                 | 13.00         | 2559.00                 | 10.00         | 1376.91                 | 83.67         |
| 1126.00                 | 12.00         | 3244.00                 | 8.00          | 2579.00                 | 14.00         | 1402.12                 | 52.01         |
| 1142.00                 | 14.00         | 3248.00                 | 20.00         | 2669.00                 | 6.00          | 1402.63                 | 67.45         |
| 1153.00                 | 12.00         | 902.00                  | 5.00          | 2862.00                 | 8.00          | 1402.90                 | 50.54         |
| 1155.00                 | 21.00         | 902.00                  | 17.00         | 3262.00                 | 12.00         | 1411.94                 | 47.22         |
| 1156.00                 | 32.00         | 941.00                  | 20.00         | 822.00                  | 19.00         | 1413.82                 | 28.40         |
| 1160.00                 | 47.00         | 955.00                  | 13.00         | 941.00                  | 6.00          | 1433.40                 | 23.33         |
| 1165.00                 | 49.00         | 971.00                  | 51.00         | 1041.00                 | 14.00         | 1437.64                 | 42.55         |
| 1167.00                 | 40.00         | 978.00                  | 9.00          | 1042.00                 | 8.00          | 1450.44                 | 30.07         |
| 1175.00                 | 34.00         | 988.00                  | 10.00         | 1043.00                 | 3.00          | 1461.38                 | 31.77         |
| 1177.00                 | 26.00         | 999.00                  | 15.00         | 1044.00                 | 5.00          | 1478.91                 | 49.80         |
| 1189.00                 | 8.00          | 1024.00                 | 22.00         | 1046.00                 | 56.00         | 1481.87                 | 101.04        |
| 1218.00                 | 26.00         | 1032.00                 | 15.00         | 1046.00                 | 26.00         | 1494.06                 | 35.55         |
| 1226.00                 | 45.00         | 1032.00                 | 19.00         | 1048.00                 | 20.00         | 1494.11                 | 24.51         |
| 1230.00                 | 56.00         | 1060.00                 | 20.00         | 1059.00                 | 9.00          | 1494.33                 | 43.35         |
| 1241.00                 | 33.00         | 1060.00                 | 31.00         | 1083.00                 | 5.00          | 1499.00                 | 69.11         |
| 1242.00                 | 21.00         | 1110.00                 | 15.00         | 1087.00                 | 9.00          | 1516.54                 | 194.53        |
| 1246.00                 | 24.00         | 1132.00                 | 23.00         | 1200.00                 | 8.00          | 1571.98                 | 26.91         |
| 1261.00                 | 46.00         | 1145.00                 | 16.00         | 1212.00                 | 15.00         | 1580.57                 | 41.02         |
| 1263.00                 | 23.00         | 1174.00                 | 16.00         | 1261.00                 | 10.00         | 1584.81                 | 63.42         |
| 1276.00                 | 66.00         | 1208.00                 | 38.00         | 1270.00                 | 9.00          | 1588.94                 | 26.59         |
| 1295.00                 | 27.00         | 1211.00                 | 57.00         | 1284.00                 | 25.00         | 1595.76                 | 35.89         |
| 1328.00                 | 22.00         | 1215.00                 | 29.00         | 1361.00                 | 3.00          | 1601.01                 | 31.20         |
| 1354.00                 | 50.00         | 1250.00                 | 18.00         | 1452.00                 | 10.00         | 1611.95                 | 31.17         |
| 1368.00                 | 73.00         | 1288.00                 | 22.00         | 1472.00                 | 15.00         | 1613.59                 | 61.36         |
| 1388.00                 | 14.00         | 1311.00                 | 7.00          | 1555.00                 | 12.00         | 1646.41                 | 27.60         |
| 1436.00                 | 42.00         | 1325.00                 | 14.00         | 1566.00                 | 3.00          | 1646.46                 | 62.05         |
| 1526.00                 | 16.00         | 1383.00                 | 15.00         | 1594.00                 | 5.00          | 1646.90                 | 27.54         |
| 1543.00                 | 3.00          | 1408.00                 | 10.00         | 1644.00                 | 14.00         | 1658.71                 | 117.24        |
| 1552.00                 | 15.00         | 1415.00                 | 4.00          | 1656.00                 | 4.00          | 1667.72                 | 11.80         |
| 1557.00                 | 55.00         | 1415.00                 | 16.00         | 1660.00                 | 5.00          | 1669.94                 | 24.81         |
| 1570.00                 | 33.00         | 1489.00                 | 11.00         | 1685.00                 | 3.00          | 1670.85                 | 15.27         |
| 1595.00                 | 56.00         | 1544.00                 | 15.00         | 1698.00                 | 5.00          | 1682.64                 | 32.64         |
| 1617.00                 | 20.00         | 1548.00                 | 10.00         | 1703.00                 | 8.00          | 1686.49                 | 51.63         |
| 1632.00                 | 20.00         | 1586.00                 | 16.00         | 1770.00                 | 4.00          | 1688.91                 | 103.86        |
| 1653.00                 | 48.00         | 1615.00                 | 7.00          | 1777.00                 | 4.00          | 1689.97                 | 35.73         |
| 1676.00                 | 8.00          | 1626.00                 | 9.00          | 1780.00                 | 5.00          | 1692.90                 | 30.69         |
| 1682.00                 | 7.00          | 1639.00                 | 6.00          | 1806.00                 | 6.00          | 1693.28                 | 20.57         |

| Zircon U-Pb Age<br>(Ma) | Error<br>(Ma) |
|-------------------------|---------------|-------------------------|---------------|-------------------------|---------------|-------------------------|---------------|
| 1695.60                 | 48.33         | 960.94                  | 42.53         | 2605.66                 | 5.99          | 1084.36                 | 33.89         |
| 1700.33                 | 17.58         | 968.97                  | 46.83         | 2617.20                 | 19.54         | 1084.86                 | 23.86         |
| 1700.78                 | 23.91         | 978.08                  | 43.40         | 847.00                  | 10.00         | 1085.00                 | 37.90         |
| 1725.67                 | 127.64        | 980.08                  | 35.88         | 868.00                  | 30.00         | 1085.25                 | 48.18         |
| 1727.94                 | 22.58         | 983.98                  | 43.63         | 879.00                  | 9.00          | 1085.37                 | 36.29         |
| 1728.24                 | 58.62         | 984.67                  | 42.69         | 949.00                  | 8.00          | 1085.78                 | 63.99         |
| 1732.64                 | 20.69         | 986.07                  | 46.62         | 964.00                  | 11.00         | 1088.10                 | 26.46         |
| 1737.77                 | 24.33         | 993.44                  | 28.67         | 1596.00                 | 8.00          | 1089.92                 | 30.46         |
| 1743.31                 | 37.66         | 995.86                  | 96.39         | 1979.00                 | 6.00          | 1097.37                 | 27.24         |
| 1754.98                 | 14.35         | 997.48                  | 20.75         | 568.48                  | 10.45         | 1100.13                 | 26.41         |
| 1757.12                 | 48.28         | 997.69                  | 14.61         | 581.13                  | 6.89          | 1106.45                 | 44.98         |
| 1758.93                 | 39.51         | 1002.15                 | 32.57         | 583.28                  | 13.44         | 1107.03                 | 51.98         |
| 1759.17                 | 57.21         | 1005.32                 | 18.89         | 595.84                  | 9.68          | 1114.51                 | 72.69         |
| 1760.96                 | 35.07         | 1006.97                 | 18.55         | 606.26                  | 5.90          | 1115.68                 | 37.33         |
| 1782.88                 | 59.47         | 1011.27                 | 29.25         | 609.79                  | 5.82          | 1117.19                 | 48.31         |
| 1789.20                 | 14.57         | 1014.09                 | 43.68         | 623.62                  | 10.70         | 1119.69                 | 41.89         |
| 1791.88                 | 32.60         | 1039.03                 | 34.13         | 631.19                  | 7.88          | 1149.17                 | 19.86         |
| 1798.15                 | 13.06         | 1052.24                 | 11.11         | 634.97                  | 6.05          | 1162.27                 | 31.53         |
| 1799.36                 | 73.24         | 1064.44                 | 29.87         | 672.72                  | 6.39          | 1181.39                 | 27.88         |
| 1799.90                 | 22.50         | 1065.55                 | 102.72        | 675.26                  | 9.94          | 1251.64                 | 29.95         |
| 1801.50                 | 42.21         | 1073.54                 | 37.97         | 676.45                  | 6.42          | 1288.33                 | 24.53         |
| 1802.74                 | 28.19         | 1080.31                 | 72.08         | 706.66                  | 9.04          | 1319.66                 | 26.36         |
| 1808.05                 | 24.69         | 1116.21                 | 16.94         | 726.86                  | 21.65         | 1739.00                 | 23.66         |
| 1809.89                 | 42.87         | 1148.74                 | 44.52         | 816.28                  | 13.72         | 1739.18                 | 18.33         |
| 1813.18                 | 97.84         | 1175.71                 | 29.42         | 838.17                  | 9.20          | 1747.21                 | 29.67         |
| 1820.69                 | 32.13         | 1199.71                 | 31.61         | 848.40                  | 7.95          | 1891.02                 | 58.67         |
| 1860.05                 | 54.86         | 1205.37                 | 60.96         | 867.47                  | 35.06         | 1976.50                 | 31.71         |
| 1861.60                 | 55.06         | 1207.01                 | 56.11         | 889.23                  | 29.32         | 2013.93                 | 22.35         |
| 1887.70                 | 40.92         | 1235.18                 | 38.04         | 894.36                  | 17.37         | 2129.59                 | 23.46         |
| 1909.65                 | 51.84         | 1238.57                 | 16.20         | 918.06                  | 12.92         | 2136.77                 | 33.59         |
| 1915.73                 | 65.10         | 1259.19                 | 63.84         | 939.05                  | 108.15        | 2153.58                 | 23.92         |
| 1949.83                 | 19.48         | 1274.41                 | 42.49         | 952.96                  | 39.73         | 2455.97                 | 27.90         |
| 2052.33                 | 49.71         | 1341.99                 | 70.33         | 956.65                  | 59.72         | 2474.14                 | 25.32         |
| 2155.99                 | 50.31         | 1449.97                 | 50.26         | 959.09                  | 33.11         | 2560.21                 | 28.11         |
| 2391.02                 | 21.73         | 1501.53                 | 28.41         | 964.12                  | 29.21         | 2659.29                 | 16.57         |
| 2466.94                 | 9.95          | 1503.20                 | 31.08         | 979.59                  | 55.03         | 2696.95                 | 22.30         |
| 2487.01                 | 11.75         | 1513.69                 | 35.42         | 982.92                  | 47.25         | 2730.41                 | 28.65         |
| 2748.51                 | 20.88         | 1591.02                 | 10.66         | 989.63                  | 48.42         | 2737.04                 | 25.18         |
| 833.00                  | 18.00         | 1593.09                 | 16.74         | 995.11                  | 64.70         | 2804.45                 | 36.31         |
| 943.00                  | 22.00         | 1611.29                 | 47.64         | 995.86                  | 20.33         | 2855.29                 | 30.28         |
| 953.00                  | 21.00         | 1627.72                 | 22.95         | 996.65                  | 32.93         | 3054.28                 | 20.80         |
| 1137.00                 | 12.00         | 1632.53                 | 10.84         | 998.42                  | 36.79         | 3192.81                 | 17.09         |
| 1296.00                 | 94.00         | 1666.82                 | 15.47         | 1001.96                 | 51.23         | 686.92                  | 20.85         |
| 1561.00                 | 13.00         | 1670.78                 | 12.57         | 1004.46                 | 24.59         | 733.91                  | 24.63         |
| 1586.00                 | 21.00         | 1758.32                 | 13.51         | 1008.74                 | 50.94         | 750.39                  | 23.38         |
| 1674.00                 | 17.00         | 1758.56                 | 4.82          | 1015.93                 | 30.60         | 761.09                  | 42.79         |
| 1705.00                 | 12.00         | 1784.81                 | 54.00         | 1021.93                 | 44.33         | 776.05                  | 7.31          |
| 2228.00                 | 19.00         | 1851.22                 | 21.01         | 1024.12                 | 58.69         | 776.70                  | 17.85         |
| 829.43                  | 9.87          | 1895.12                 | 27.24         | 1029.49                 | 65.33         | 789.50                  | 41.09         |
| 839.14                  | 51.94         | 1915.48                 | 15.29         | 1032.91                 | 58.82         | 790.54                  | 11.53         |
| 847.01                  | 32.56         | 2084.76                 | 23.82         | 1039.47                 | 37.22         | 792.77                  | 14.84         |
| 875.37                  | 45.42         | 2465.24                 | 46.96         | 1040.01                 | 32.71         | 795.10                  | 17.35         |
| 883.45                  | 48.29         | 2465.38                 | 5.64          | 1043.51                 | 47.02         | 801.51                  | 7.54          |
| 897.92                  | 32.90         | 2468.99                 | 5.85          | 1044.17                 | 30.46         | 808.49                  | 8.43          |
| 899.76                  | 15.43         | 2473.65                 | 24.37         | 1047.25                 | 46.79         | 809.40                  | 17.72         |
| 900.27                  | 7.22          | 2474.31                 | 8.45          | 1052.34                 | 41.15         | 817.55                  | 10.37         |
| 906.92                  | 79.17         | 2475.82                 | 22.42         | 1054.15                 | 22.57         | 825.27                  | 8.52          |
| 912.93                  | 59.90         | 2477.70                 | 9.23          | 1060.73                 | 35.62         | 827.10                  | 16.15         |
| 919.75                  | 74.21         | 2490.68                 | 8.21          | 1063.95                 | 93.67         | 831.41                  | 7.80          |
| 929.67                  | 29.84         | 2491.03                 | 23.20         | 1065.53                 | 29.98         | 834.65                  | 7.83          |
| 943.84                  | 85.08         | 2493.78                 | 7.50          | 1069.33                 | 27.34         | 837.88                  | 15.01         |
| 944.74                  | 30.39         | 2495.20                 | 21.40         | 1074.35                 | 29.32         | 838.97                  | 19.82         |
| 948.03                  | 23.97         | 2507.30                 | 6.17          | 1077.77                 | 31.11         | 842.83                  | 7.90          |
| 950.33                  | 12.43         | 2536.30                 | 15.77         | 1081.13                 | 28.30         | 845.65                  | 7.93          |
| 952.82                  | 30.87         | 2553.50                 | 8.37          | 1083.36                 | 29.89         | 847.25                  | 16.83         |

| Zircon U-Pb Age<br>(Ma) | Error<br>(Ma) |
|-------------------------|---------------|-------------------------|---------------|-------------------------|---------------|-------------------------|---------------|
| 849.83                  | 8.68          | 2520.06                 | 34.61         | 1045.10                 | 41.98         | 871.64                  | 84.35         |
| 850.72                  | 10.20         | 2520.60                 | 53.77         | 1062.25                 | 88.41         | 872.31                  | 22.58         |
| 851.34                  | 15.07         | 2520.97                 | 16.80         | 1067.83                 | 56.33         | 874.67                  | 46.63         |
| 853.07                  | 31.40         | 2529.51                 | 40.79         | 1079.32                 | 23.68         | 876.00                  | 52.18         |
| 864.73                  | 8.09          | 2540.15                 | 39.07         | 1081.05                 | 29.70         | 876.47                  | 89.68         |
| 869.13                  | 9.27          | 2543.57                 | 44.43         | 1081.79                 | 88.71         | 877.81                  | 50.71         |
| 877.60                  | 14.36         | 2607.70                 | 79.50         | 1083.20                 | 34.51         | 878.82                  | 35.82         |
| 929.54                  | 33.47         | 2719.23                 | 29.18         | 1088.46                 | 26.46         | 888.89                  | 32.03         |
| 937.78                  | 80.61         | 2739.73                 | 45.24         | 1091.59                 | 50.11         | 890.93                  | 55.18         |
| 942.95                  | 60.86         | 2754.87                 | 31.71         | 1091.78                 | 34.25         | 895.58                  | 53.89         |
| 948.99                  | 94.79         | 582.12                  | 19.82         | 1093.32                 | 63.90         | 899.74                  | 54.05         |
| 955.09                  | 106.61        | 596.53                  | 11.22         | 1093.57                 | 35.65         | 904.87                  | 62.67         |
| 957.81                  | 62.36         | 603.23                  | 20.67         | 1095.35                 | 35.24         | 907.86                  | 45.34         |
| 966.02                  | 27.36         | 603.54                  | 20.91         | 1095.36                 | 29.23         | 917.26                  | 54.10         |
| 972.07                  | 30.60         | 606.91                  | 5.79          | 1101.82                 | 65.23         | 940.85                  | 57.81         |
| 975.50                  | 84.27         | 607.81                  | 7.60          | 1104.46                 | 22.59         | 952.47                  | 63.38         |
| 980.86                  | 69.07         | 609.02                  | 9.59          | 1105.39                 | 93.80         | 961.15                  | 41.27         |
| 981.21                  | 77.72         | 613.58                  | 5.85          | 1112.42                 | 24.17         | 963.13                  | 57.02         |
| 984.54                  | 56.40         | 647.19                  | 14.90         | 1131.89                 | 68.12         | 966.96                  | 45.73         |
| 985.55                  | 47.23         | 652.78                  | 6.21          | 1142.39                 | 56.87         | 972.70                  | 51.66         |
| 986.19                  | 42.13         | 653.94                  | 7.46          | 1144.50                 | 60.27         | 974.81                  | 52.41         |
| 991.81                  | 41.28         | 676.37                  | 6.42          | 1150.16                 | 38.92         | 985.07                  | 46.84         |
| 992.49                  | 28.47         | 682.45                  | 8.29          | 1150.71                 | 76.67         | 989.44                  | 34.99         |
| 994.80                  | 48.18         | 720.54                  | 6.82          | 1168.47                 | 27.53         | 990.24                  | 32.34         |
| 997.75                  | 43.89         | 726.44                  | 13.19         | 1174.24                 | 104.80        | 996.81                  | 46.54         |
| 998.95                  | 74.18         | 727.72                  | 51.94         | 1241.73                 | 20.58         | 998.69                  | 36.78         |
| 999.14                  | 38.39         | 760.29                  | 52.73         | 1297.31                 | 33.25         | 1000.51                 | 21.12         |
| 1005.76                 | 25.17         | 891.77                  | 20.65         | 1303.33                 | 50.90         | 1009.09                 | 30.02         |
| 1020.36                 | 46.78         | 896.09                  | 89.60         | 1303.72                 | 92.51         | 1021.32                 | 29.76         |
| 1027.78                 | 61.13         | 899.58                  | 74.70         | 1766.52                 | 35.81         | 1023.55                 | 29.36         |
| 1034.16                 | 32.76         | 915.92                  | 64.20         | 2046.81                 | 23.68         | 1026.39                 | 49.36         |
| 1057.30                 | 51.75         | 917.16                  | 41.39         | 2083.91                 | 42.76         | 1026.67                 | 141.35        |
| 1070.10                 | 59.71         | 922.68                  | 38.45         | 2126.93                 | 25.04         | 1026.94                 | 42.48         |
| 1151.55                 | 66.93         | 931.11                  | 59.12         | 2166.08                 | 20.23         | 1063.45                 | 91.17         |
| 1200.54                 | 48.50         | 934.08                  | 74.08         | 2358.37                 | 24.08         | 1067.96                 | 41.33         |
| 1247.44                 | 23.50         | 945.18                  | 70.89         | 2463.38                 | 24.67         | 1106.98                 | 40.78         |
| 1504.60                 | 26.27         | 953.64                  | 48.89         | 2514.28                 | 27.57         | 1111.70                 | 129.94        |
| 1599.56                 | 34.72         | 960.08                  | 70.51         | 2676.75                 | 54.46         | 1271.24                 | 39.62         |
| 1608.89                 | 56.67         | 960.73                  | 41.71         | 2699.16                 | 33.69         | 1314.61                 | 23.66         |
| 1624.64                 | 41.12         | 961.58                  | 63.35         | 2745.33                 | 35.84         | 1330.21                 | 29.61         |
| 1654.23                 | 31.87         | 962.73                  | 58.64         | 2800.20                 | 75.14         | 1472.88                 | 37.01         |
| 1683.19                 | 23.82         | 971.81                  | 72.23         | 607.88                  | 24.71         | 1562.56                 | 36.76         |
| 1690.39                 | 38.37         | 976.54                  | 27.33         | 616.60                  | 5.88          | 1584.74                 | 45.25         |
| 1755.87                 | 54.54         | 977.40                  | 30.78         | 620.73                  | 15.45         | 1585.77                 | 36.83         |
| 1858.74                 | 20.24         | 978.42                  | 48.30         | 650.91                  | 30.09         | 1605.59                 | 39.53         |
| 1873.10                 | 32.28         | 997.01                  | 25.00         | 660.98                  | 23.37         | 1614.44                 | 19.74         |
| 1876.02                 | 26.68         | 998.53                  | 90.65         | 711.66                  | 22.37         | 1637.01                 | 42.72         |
| 1892.69                 | 39.22         | 1000.21                 | 40.23         | 726.10                  | 19.98         | 1645.29                 | 48.42         |
| 1991.66                 | 20.09         | 1006.18                 | 53.57         | 747.29                  | 31.19         | 1714.25                 | 20.04         |
| 1991.84                 | 40.73         | 1006.29                 | 27.80         | 767.28                  | 27.85         | 1740.69                 | 27.13         |
| 2140.22                 | 17.66         | 1011.54                 | 48.90         | 777.60                  | 16.92         | 1749.47                 | 27.83         |
| 2142.82                 | 43.18         | 1011.93                 | 34.06         | 798.54                  | 18.70         | 1761.96                 | 22.12         |
| 2261.68                 | 39.51         | 1015.33                 | 27.15         | 825.75                  | 42.84         | 1791.36                 | 42.81         |
| 2329.32                 | 37.00         | 1016.03                 | 40.73         | 832.03                  | 20.87         | 1792.20                 | 54.24         |
| 2358.57                 | 28.52         | 1016.73                 | 41.94         | 835.38                  | 102.47        | 1826.81                 | 27.02         |
| 2454.96                 | 34.33         | 1020.66                 | 28.77         | 836.66                  | 54.39         | 1846.43                 | 48.50         |
| 2463.27                 | 39.71         | 1024.72                 | 43.71         | 845.75                  | 70.64         | 1860.50                 | 18.06         |
| 2469.21                 | 24.99         | 1026.11                 | 28.13         | 846.44                  | 25.82         | 1862.54                 | 46.77         |
| 2481.24                 | 18.89         | 1031.06                 | 49.13         | 848.49                  | 84.66         | 2072.14                 | 17.62         |
| 2484.03                 | 36.93         | 1036.79                 | 43.44         | 851.25                  | 37.00         | 2072.88                 | 34.18         |
| 2493.44                 | 32.18         | 1037.33                 | 68.73         | 857.99                  | 35.30         | 2110.37                 | 22.28         |
| 2496.13                 | 32.16         | 1040.06                 | 27.46         | 858.51                  | 28.04         | 2450.42                 | 53.98         |
| 2497.41                 | 30.65         | 1040.21                 | 65.22         | 861.89                  | 42.95         | 2460.00                 | 18.93         |
| 2510.10                 | 46.59         | 1040.66                 | 20.20         | 863.35                  | 37.35         | 2480.28                 | 24.12         |
| 2517.66                 | 37.65         | 1044.47                 | 36.92         | 865.27                  | 37.13         | 2481.14                 | 32.38         |

| Zircon U-Pb Age<br>(Ma) | Error<br>(Ma) | Zircon U-Pb Age<br>(Ma)                       | Error<br>(Ma) |
|-------------------------|---------------|-----------------------------------------------|---------------|
| 2482.98                 | 19.22         | 1212.15                                       | 65.16         |
| 2483.64                 | 27.48         | 1434.66                                       | 94.48         |
| 2484.54                 | 49.58         | 1133.90                                       | 58.93         |
| 2491.21                 | 44.15         | 1124.53                                       | 42.07         |
| 2491.60                 | 38.08         | 1197.66                                       | 48.91         |
| 2492.93                 | 25.11         | 1086.54                                       | 54.36         |
| 2501.80                 | 28.78         | 1123.52                                       | 31.70         |
| 2504.52                 | 42.57         | 1145.82                                       | 19.87         |
| 2508.58                 | 27.92         | 1162.43                                       | 19.82         |
| 2512.17                 | 31.95         | 1116.10                                       | 78.48         |
| 2513.41                 | 23.03         | 1153.94                                       | 47.44         |
| 2514.86                 | 35.81         | 1203.13                                       | 50.87         |
| 2516.13                 | 25.21         | 1189.35                                       | 19.75         |
| 2517.55                 | 32.27         | 1150.49                                       | 22.04         |
| 2517.75                 | 20.67         | 1201.17                                       | 54.22         |
| 2519.11                 | 26.21         | 1389.87                                       | 28.02         |
| 2520.53                 | 31.43         | 1632.83                                       | 41.44         |
| 2521.37                 | 26.37         | 1249.12                                       | 28.99         |
| 2521.64                 | 27.72         | 1233.50                                       | 19.65         |
| 2524.06                 | 36.78         | 1215.44                                       | 31.68         |
| 2530.91                 | 32.22         | 1338.83                                       | 21.46         |
| 2546.38                 | 30.00         | 1418.62                                       | 40.54         |
| 2549.44                 | 32.17         | 1404.52                                       | 62.08         |
| 2563.07                 | 27.60         | 1456.05                                       | 33.10         |
| 2582.47                 | 26.38         | 1764.66                                       | 51.17         |
| 2587.91                 | 64.28         | 1622.99                                       | 34.79         |
| 2626.32                 | 22.28         | 1643.21                                       | 46.58         |
| 2724.99                 | 41.52         | 1734.89                                       | 28.98         |
| 3111.51                 | 30.74         | 1662.21                                       | 27.95         |
| 3119.62                 | 24.03         | 1878.27                                       | 22.53         |
| 3249.24                 | 26.62         | 1843.56                                       | 30.04         |
| 594.13                  | 16.01         | 1823.40                                       | 18.14         |
| 599.30                  | 8.98          | 2058.32                                       | 24.00         |
| 607.10                  | 20.22         | 2467.24                                       | 34.46         |
| 607.15                  | 9.50          | 2839.33                                       | 18.91         |
| 624.35                  | 12.08         | 2646.37                                       | 122.33        |
| 630.63                  | 16.46         | 2820.94                                       | 46.87         |
| 644.12                  | 24.95         | 2701.06                                       | 18.16         |
| 651.64                  | 32.60         | 2849.89                                       | 23.94         |
| 655.76                  | 9.04          | *All Data compiled by Gehrels<br>et al., 2011 |               |
| 696.24                  | 28.11         |                                               |               |
| 754.99                  | 25.08         |                                               |               |
| 766.17                  | 11.12         |                                               |               |
| 777.97                  | 15.68         |                                               |               |
| 778.04                  | 39.29         |                                               |               |
| 793.98                  | 7.47          |                                               |               |
| 847.84                  | 65.62         |                                               |               |
| 867.21                  | 57.53         |                                               |               |
| 878.23                  | 8.37          |                                               |               |
| 926.90                  | 30.48         |                                               |               |
| 927.11                  | 34.28         |                                               |               |
| 937.57                  | 45.11         |                                               |               |
| 938.51                  | 8.73          |                                               |               |
| 991.44                  | 13.05         |                                               |               |
| 1058.66                 | 51.35         |                                               |               |
| 1219.99                 | 26.54         |                                               |               |
| 1063.63                 | 34.80         |                                               |               |
| 1142.37                 | 30.62         |                                               |               |
| 1042.98                 | 30.10         |                                               |               |
| 1109.35                 | 30.17         |                                               |               |
| 1397.54                 | 19.17         |                                               |               |
| 1359.27                 | 59.76         |                                               |               |
| 1086.54                 | 60.37         |                                               |               |
| 1102.25                 | 64.42         |                                               |               |
| 1376.62                 | 34.04         |                                               |               |

**Table DR9. Compiled Zircon U-Pb Ages of Tectonic Blocks (Greater Himalaya-Zaskar) \***

| Sample name | Zircon U-Pb Age (Ma) | Error (Ma) |
|-------------|----------------------|------------|
| G53         | 57.76                | 1.15       |
| G10         | 245.51               | 2.85       |
| G112        | 301                  | 4.18       |
| G52         | 336.65               | 3.92       |
| G11         | 338.42               | 4.53       |
| G20         | 341.3                | 3.91       |
| G70         | 349.18               | 4.27       |
| G110        | 356.01               | 4.15       |
| G16         | 356.62               | 4.88       |
| G55         | 366.31               | 4.39       |
| G50         | 379.58               | 5.47       |
| G33         | 398.63               | 4.48       |
| G65         | 399.36               | 4.73       |
| G106        | 399.42               | 4.73       |
| G21         | 400.94               | 4.72       |
| G79         | 421.86               | 4.71       |
| G45         | 426.09               | 4.71       |
| G88         | 427.66               | 5.19       |
| G80         | 428.5                | 5.07       |
| G4          | 441.46               | 5.3        |
| G62         | 446.27               | 4.93       |
| G104        | 451.5                | 5.29       |
| G99         | 453                  | 5.53       |
| G17         | 462.91               | 6.72       |
| G89         | 463.21               | 5.28       |
| G32         | 464.05               | 5.16       |
| G40         | 467.83               | 5.28       |
| G94         | 468.97               | 5.51       |
| G72         | 469.39               | 5.75       |
| G25         | 475.68               | 5.39       |
| G48         | 551.46               | 6.27       |
| G46         | 572.13               | 6.84       |
| G59         | 573.61               | 7.78       |
| G27         | 658.33               | 7.57       |
| G85         | 664.9                | 7.44       |
| G74         | 673.44               | 7.9        |
| G90         | 696.34               | 7.99       |
| G9          | 707.9                | 7.97       |
| G19         | 721.35               | 8.53       |
| G14         | 735.22               | 8.4        |
| G82         | 744.94               | 8.5        |
| G35         | 750.68               | 8.15       |
| G58         | 752.05               | 8.26       |
| G24         | 752.51               | 8.6        |
| G78         | 752.63               | 8.26       |
| G43         | 759.91               | 9.17       |
| G12         | 760.08               | 8.59       |
| G108        | 763.17               | 9.16       |
| G23         | 771.24               | 8.46       |
| G75         | 772.22               | 8.46       |
| G2          | 772.33               | 8.23       |
| G47         | 780.22               | 8.45       |
| G39         | 784.67               | 9.36       |
| G29         | 786.1                | 8.56       |
| G1          | 791.46               | 8.55       |
| G91         | 792.48               | 8.78       |
| G66         | 793.4                | 9.01       |
| G68         | 794.02               | 9.12       |
| G44         | 794.65               | 8.55       |
| G15         | 795.05               | 8.89       |
| G117        | 796.64               | 10.6       |

| Sample name | Zircon U-Pb Age (Ma) | Error (Ma) |
|-------------|----------------------|------------|
| G54         | 796.93               | 9.23       |
| G96         | 797.56               | 8.89       |
| G28         | 797.78               | 8.66       |
| G42         | 798.47               | 9.23       |
| G67         | 799.38               | 8.88       |
| G7          | 801.31               | 8.65       |
| G34         | 802.05               | 8.88       |
| G107        | 802.91               | 9.33       |
| G92         | 803.14               | 9.56       |
| G83         | 806.95               | 9.1        |
| G61         | 807.8                | 9.1        |
| G49         | 809.39               | 9.1        |
| G26         | 810.7                | 9.21       |
| G56         | 813.43               | 8.98       |
| G103        | 814.28               | 9.32       |
| G3          | 815.13               | 8.86       |
| G118        | 824.95               | 10.1       |
| G77         | 835.72               | 9.63       |
| G115        | 840.59               | 10.18      |
| G113        | 840.65               | 9.62       |
| G105        | 851.44               | 11.18      |
| G13         | 853.82               | 10.05      |
| G81         | 854.89               | 9.71       |
| G93         | 855.74               | 12.31      |
| G71         | 875.8                | 10.13      |
| G6          | 1040.1               | 20.03      |
| G114        | 1043.1               | 25.32      |
| G101        | 1115.22              | 23.59      |
| G60         | 1220.47              | 23.31      |
| G109        | 1503.69              | 27.91      |
| G38         | 1599.33              | 25.52      |
| G97         | 1749.62              | 28.11      |
| G18         | 1865.87              | 25.33      |
| G37         | 2364.28              | 25.61      |
| G36         | 2419.17              | 26.56      |
| G30         | 2421.98              | 26.88      |
| G76         | 2438.87              | 29.72      |
| G22         | 2610.7               | 26.25      |
| G116        | 2749.5               | 32.98      |
| G95         | 2822.76              | 32.6       |
| G87         | 2865.31              | 31.55      |
| G57         | 3116.45              | 28.23      |

\*Data from Jonell et al., 2017

**Table DR9. Compiled Zircon U-Pb Ages of Tectonic Blocks (Greater Himalaya-Himachal) \***

|                      |            | Zircon U-Pb Age (Ma) | Error (Ma) | Zircon U-Pb Age (Ma) | Error (Ma) | Zircon U-Pb Age (Ma) | Error (Ma) |
|----------------------|------------|----------------------|------------|----------------------|------------|----------------------|------------|
|                      |            | 1906.7               | 29.7       | 2838.3               | 12.1       | 898.2                | 10.6       |
|                      |            | 2556                 | 14.6       | 1047.5               | 28.1       | 849                  | 14.2       |
| Zircon U-Pb Age (Ma) | Error (Ma) | 826.1                | 7.8        | 539.1                | 4.5        | 1113.4               | 25.3       |
|                      |            | 1163.8               | 210.6      | 599.5                | 7.5        | 874.3                | 20         |
| 1220.2               | 35.5       | 2553.5               | 8.4        | 3170.7               | 52.4       | 847.8                | 17.4       |
| 1774.7               | 42         | 946.5                | 17.3       | 2532.1               | 11.8       | 1941                 | 16.6       |
| 1852.8               | 245.2      | 2477.3               | 19.3       | 1133.3               | 19.3       | 914.4                | 34.2       |
| 769.7                | 18         | 952                  | 14.6       | 1892.4               | 62.3       | 1784.6               | 40.9       |
| 1515.7               | 25.1       | 2751.8               | 24.3       | 2574                 | 11.7       | 950.4                | 17.9       |
| 1205.2               | 37.6       | 1058.9               | 15         | 433.7                | 28.2       | 1651.8               | 26.1       |
| 1238                 | 33.8       | 812.5                | 27.6       | 1403.7               | 14.1       | 1913.4               | 14.4       |
| 1243                 | 38.7       | 2575.1               | 9.4        | 1086.8               | 27.2       | 805.4                | 29.8       |
| 1347.6               | 23.8       | 855.5                | 24         | 1619.8               | 44.2       | 2607.9               | 11.7       |
| 908.7                | 34         | 853.7                | 18.1       | 2752                 | 11.5       | 2521.7               | 11.8       |
| 2333.9               | 25.4       | 824.3                | 7.8        | 2552.2               | 11.7       | 814.1                | 11         |
| 677.6                | 47.7       | 2564.4               | 14         | 1603.3               | 27.5       | 777.1                | 21.5       |
| 1189.5               | 81.2       | 904.1                | 42.1       | 1075.9               | 14.1       | 809.1                | 8.6        |
| 1213.7               | 30.1       | 919                  | 27.2       | 1083.1               | 29.4       | 835.7                | 12.4       |
| 1595.1               | 49.4       | 837.2                | 11.3       | 2828.8               | 15.8       | 797.5                | 8.5        |
| 818.7                | 12.8       | 1993.9               | 8.9        | 1135.9               | 40.3       | 1047.5               | 49.5       |
| 2533.3               | 14.1       | 847.9                | 23.4       | 1369.7               | 26.3       | 2038.7               | 50.1       |
| 810.9                | 32.2       | 2775.4               | 13.6       | 2773.3               | 12.6       | 2079.9               | 13.1       |
| 1622.9               | 705.6      | 1758                 | 21.1       | 2136.5               | 13.3       | 2495.6               | 11.8       |
| 2690.6               | 20.3       | 968.5                | 28.1       | 574.1                | 106.6      | 2554.2               | 12.4       |
| 2554.2               | 30.5       | 1929.5               | 9.2        | 932.5                | 13.3       | 758.3                | 82.6       |
| 797.2                | 7.5        | 764.6                | 50.9       | 954.4                | 26.3       | 1632.3               | 21         |
| 2558.9               | 20.3       | 980.3                | 13.1       | 2117.2               | 12.3       | 2516.3               | 30.5       |
| 846.6                | 8.8        | 1634                 | 25.1       | 1700.3               | 13.3       | 908.4                | 22.5       |
| 835.9                | 7.8        | 939.5                | 9.2        | 1978.4               | 32.4       | 2477.8               | 17.6       |
| 2578.3               | 8.4        | 896.7                | 8.4        | 1562.4               | 13.2       | 935.4                | 7.6        |
| 959.4                | 21.4       | 1645.3               | 109.8      | 1074.3               | 30.5       | 899.3                | 14.3       |
| 851                  | 16         | 1434                 | 43.8       | 970.1                | 24.3       | 1893.2               | 17.8       |
| 2572.6               | 8.4        | 1200.3               | 46.1       | 1080.4               | 28.8       | 2333.3               | 29.5       |
| 943.7                | 20.6       | 1375.4               | 316.6      | 2598.7               | 11.7       | 2536.2               | 11.8       |
| 878                  | 15.7       | 2546.8               | 8.4        | 1661.8               | 15.2       | 822.2                | 9.2        |
| 1767.9               | 23.4       | 1214.8               | 186.8      | 1087.8               | 56.2       | 830.4                | 38.6       |
| 803.4                | 14.3       | 1058                 | 28.3       | 557                  | 7.3        | 1019.3               | 116.9      |
| 843.2                | 15.5       | 1832.6               | 28.1       | 2757                 | 11.5       | 804.4                | 8.3        |
| 2570.8               | 8.6        | 1056.8               | 51.7       | 1858.6               | 43.1       | 903                  | 12.7       |
| 1920.5               | 21.3       | 2585.7               | 28.5       | 2765.8               | 11.5       | 455.7                | 3.5        |
| 835.5                | 14.3       | 1230.6               | 19.5       | 2622.5               | 11.7       | 1841.4               | 14.7       |
| 2297.9               | 72.9       | 2577.1               | 17.9       | 2123.8               | 12.3       | 1677.1               | 37.5       |
| 1046.1               | 86.9       | 787.5                | 14.7       | 2161.5               | 109.2      | 875.5                | 15.1       |
| 1135.4               | 31.7       | 859.3                | 8.1        | 2514.8               | 11.9       | 815.9                | 9.4        |
| 2616                 | 12         | 2486.1               | 27.2       | 2500.1               | 19.6       | 629.5                | 55.1       |
| 890.9                | 20.3       | 844.3                | 7.9        | 886.8                | 10.9       | 1099.1               | 16.8       |
| 973                  | 13.3       | 2739.2               | 8.4        | 2547.1               | 12.5       | 2550.3               | 37.5       |
| 2559.4               | 8.4        | 841.4                | 16.8       | 950.7                | 15.1       | 2177.8               | 48.6       |
| 1022.6               | 16.1       | 2154.9               | 15.8       | 929.5                | 19.5       | 2583.6               | 11.9       |
| 2674.2               | 9.1        | 2496.6               | 10.7       | 960.2                | 19.7       | 1983.9               | 31         |
| 858.8                | 11.2       | 1051.9               | 19.3       | 1316.7               | 18.8       | 1180.2               | 254.3      |
| 1006.1               | 194.7      | 2565.5               | 14.6       | 2557.5               | 18.3       | 2577.9               | 11.7       |
| 2548                 | 8.4        | 2795.2               | 11.5       | 961                  | 9.5        | 372.8                | 3.9        |
| 1478.2               | 19.2       | 1041.6               | 34.4       | 867                  | 17.3       | 898.3                | 33.2       |
| 2499.6               | 14.1       | 2575.4               | 13.1       | 2397.2               | 53.9       | 924.6                | 16.2       |
| 1206                 | 11.7       | 2565.3               | 11.7       | 1354.8               | 188.4      | 846.4                | 5.6        |
| 2513.4               | 21.9       | 2553.1               | 16.6       | 806                  | 30.1       | 996                  | 45.2       |
| 1622.8               | 22.8       | 2410.9               | 13.9       | 882.2                | 11.3       | 1882.8               | 12.6       |
| 883.1                | 8.8        | 1690                 | 46.1       | 1582.5               | 75         | 146.6                | 50.6       |
| 1772.2               | 39.4       | 1928.8               | 21         | 778.6                | 19.5       | 811.4                | 33.4       |
| 846.2                | 21.3       | 2509.9               | 14.5       | 2454.7               | 36.5       | 1738.5               | 12.9       |
| 866.7                | 22.1       | 2597.6               | 11.7       | 828                  | 24.2       | 866.9                | 20.5       |
| 1744.9               | 24.9       | 2484.5               | 11.8       | 1482.5               | 30.9       | 2040.6               | 16.5       |
| 975.9                | 9.1        | 1361                 | 72.1       | 826.2                | 16.8       | 1449.4               | 34.1       |

| Zircon U-Pb<br>Age (Ma) | Error (Ma) |
|-------------------------|------------|-------------------------|------------|-------------------------|------------|-------------------------|------------|
| 763                     | 17.9       | 1080.5                  | 14.1       | 1142.2                  | 26.6       | 1939.1                  | 29.4       |
| 937.4                   | 13.4       | 1143.4                  | 14.3       | 1315.6                  | 27.6       | 889                     | 12.5       |
| 776.8                   | 14.2       | 1817.6                  | 21.9       | 973.2                   | 15.4       | 859.7                   | 11         |
| 2853.6                  | 11.4       | 1171.8                  | 13.9       | 1044.8                  | 14.7       | 2213.6                  | 251.4      |
| 815.8                   | 17.6       | 939.6                   | 8.8        | 1035.7                  | 66.7       | 800.9                   | 23.5       |
| 832.5                   | 24.7       | 2477.7                  | 13.5       | 1135.5                  | 89.9       | 1044                    | 102        |
| 1695.8                  | 18.4       | 977.2                   | 10.9       | 911.9                   | 15.3       | 1074.8                  | 83.7       |
| 408.4                   | 11         | 3381.2                  | 24.9       | 1118.2                  | 14.1       | 943.5                   | 6.6        |
| 821.9                   | 9.4        | 2733.9                  | 11.5       | 1028.9                  | 82.1       | 1071                    | 64.2       |
| 2467.7                  | 16.1       | 1173.9                  | 19.9       | 1139.4                  | 20         | 1918.1                  | 27.8       |
| 866.2                   | 16.7       | 802.3                   | 12.8       | 1082.4                  | 38.4       | 539.6                   | 24.6       |
| 583.3                   | 5.4        | 1317.4                  | 32.1       | 1127.5                  | 46         | 2594.9                  | 16.2       |
| 1924                    | 12.6       | 931.6                   | 8.7        | 1714.2                  | 12.9       | 1342.3                  | 73.6       |
| 2550.8                  | 45.6       | 1139.9                  | 33         | 1049.3                  | 34.4       | 2516.1                  | 15.7       |
| 768.7                   | 9.1        | 1285.8                  | 256.7      | 967.2                   | 11.2       | 2561.7                  | 18.2       |
| 948.2                   | 17.8       | 2819.6                  | 11.4       | 1047.7                  | 25.7       | 765.8                   | 6.2        |
| 2511.3                  | 11.8       | 591.5                   | 7.9        | 623                     | 8.9        | 2608                    | 12.5       |
| 1081.5                  | 21.1       | 1143                    | 39.8       | 1126.4                  | 36         | 1689                    | 25.6       |
| 1567                    | 24.3       | 925                     | 20.3       | 1096.7                  | 40.1       | 852.8                   | 22.6       |
| 1656.4                  | 120.2      | 1368.3                  | 13.5       | 1535.1                  | 61.9       | 2557.3                  | 11.7       |
| 1360.1                  | 20.4       | 1002.3                  | 78         | 2778                    | 11.5       | 957.9                   | 26         |
| 1801.4                  | 13.9       | 1167.6                  | 31.7       | 1079.4                  | 14.1       | 3513.2                  | 10.8       |
| 1833.4                  | 22.8       | 915.7                   | 8.5        | 2764.7                  | 35.4       | 772.6                   | 17.9       |
| 1638.7                  | 105.2      | 908                     | 9.3        | 1090.3                  | 42.7       | 1009.3                  | 76.2       |
| 1291.1                  | 32.6       | 1154                    | 55.8       | 1684.3                  | 16.8       | 725.7                   | 43.4       |
| 1833.8                  | 208.9      | 2532.9                  | 11.8       | 2826.6                  | 11.4       | 798.3                   | 13.3       |
| 1324.5                  | 61.1       | 1359.7                  | 29.7       | 2768.9                  | 22.5       | 3021.1                  | 42.2       |
| 1820.3                  | 37.1       | 1180.7                  | 30.2       | 1244.5                  | 232.3      | 554.2                   | 13.9       |
| 1744                    | 133.2      | 603.3                   | 5.8        | 1664.2                  | 22.3       | 774.2                   | 11.3       |
| 1809.4                  | 83.4       | 1125.1                  | 30.8       | 1156                    | 130.2      | 1174.9                  | 125        |
| 799.5                   | 55.4       | 1091.9                  | 16.4       | 943.9                   | 17.5       | 1456.4                  | 31.1       |
| 1968.9                  | 53.5       | 1082.2                  | 56.5       | 1249.3                  | 85.5       | 2603.8                  | 11.7       |
| 1806.4                  | 48         | 1151.2                  | 187.6      | 2573.7                  | 25.3       | 2637.9                  | 23.4       |
| 1881.3                  | 20.5       | 1671.7                  | 70.6       | 1330.1                  | 325.7      | 938.6                   | 19         |
| 1812.5                  | 39         | 2501.9                  | 13.7       | 950.3                   | 23.1       | 738                     | 10         |
| 1262.2                  | 55.8       | 942.6                   | 25.4       | 1734.5                  | 12.8       | 1133.3                  | 44.2       |
| 1759.2                  | 48.1       | 2541.5                  | 11.7       | 1011.4                  | 56.4       | 2483.2                  | 11.9       |
| 1786.1                  | 110.6      | 911.1                   | 15.3       | 570.8                   | 8          | 1476.5                  | 23.7       |
| 1776.1                  | 71.3       | 2862.9                  | 11.4       | 1430.3                  | 18.3       | 882.7                   | 16.7       |
| 1127.7                  | 382.4      | 1106                    | 59.1       | 1723.7                  | 57         | 2619.9                  | 11.6       |
| 1398.6                  | 258        | 845.6                   | 9.5        | 2524.8                  | 11.8       | 2570.7                  | 30.8       |
| 1296.2                  | 78.8       | 1145.9                  | 25.9       | 1142.7                  | 24.6       | 867.2                   | 14.7       |
| 1781.6                  | 121.9      | 1249.8                  | 68.6       | 2580.6                  | 11.7       | 2488.8                  | 22.8       |
| 1428.6                  | 70.9       | 1021.1                  | 80.9       | 2399.5                  | 11.9       | 2513.5                  | 12.4       |
| 1333.5                  | 35         | 905.6                   | 11.8       | 542.5                   | 7.8        | 781                     | 11.1       |
| 1743.7                  | 37.5       | 1081.4                  | 69.7       | 1189.3                  | 76.8       | 1771.4                  | 18.2       |
| 2010                    | 37.5       | 1473.8                  | 48.8       | 2552.5                  | 11.8       | 2529.7                  | 15.6       |
| 1441                    | 238.7      | 1477.9                  | 13.3       | 1596.9                  | 55.2       | 535.2                   | 19.6       |
| 1594.4                  | 30.6       | 750.8                   | 16.3       | 2510.6                  | 17.9       | 946.3                   | 20.6       |
| 807.7                   | 76.6       | 477.3                   | 34.1       | 1154.5                  | 62.7       | 890.4                   | 8.5        |
| 862.2                   | 21.5       | 1137.7                  | 63.5       | 897.4                   | 129.6      | 856.4                   | 26.7       |
| 1792.7                  | 194.5      | 1781.9                  | 16.4       | 1318.5                  | 111.4      | 1000                    | 248.8      |
| 1751.4                  | 29.6       | 1472.2                  | 47.9       | 1887.5                  | 12.7       | 1248.6                  | 62.1       |
| 1568.3                  | 61.6       | 776.2                   | 37.3       | 1074.1                  | 141.9      | 1680.2                  | 13.3       |
| 1603.5                  | 129        | 1155.7                  | 24.5       | 1025.5                  | 56.9       | 1319.6                  | 22.9       |
| 1531.5                  | 14.5       | 2877.2                  | 16.3       | 919.4                   | 18.4       | 1455.9                  | 13.4       |
| 1076.5                  | 42.4       | 1182.5                  | 19.8       | 994.7                   | 33.4       | 2724.9                  | 16.2       |
| 1124.4                  | 91.1       | 1665.6                  | 44.5       | 2556.4                  | 12.7       | 1090                    | 19.3       |
| 1318.5                  | 21.5       | 937.1                   | 14.5       | 2594.1                  | 11.7       | 1113.9                  | 18.8       |
| 750.4                   | 56.7       | 978.7                   | 22.7       | 2449                    | 11.8       | 1301.3                  | 36.6       |
| 1040.6                  | 41.4       | 1174.5                  | 14.1       | 2671.6                  | 40.7       | 1205.6                  | 122.5      |
| 637.9                   | 7.9        | 1179                    | 14.4       | 923.2                   | 8.1        | 777.3                   | 9.2        |
| 935.9                   | 11.3       | 1467.6                  | 31.9       | 560.3                   | 5.6        | 897.5                   | 15.1       |
| 1382.5                  | 32.8       | 1148                    | 241.3      | 1475.9                  | 28         | 2523.9                  | 11.8       |



| Zircon U-Pb<br>Age (Ma) | Error (Ma) | Zircon U-Pb<br>Age (Ma)      | Error (Ma) |
|-------------------------|------------|------------------------------|------------|
| 1126.4                  | 23         | 2162.1                       | 12.2       |
| 928.4                   | 6.6        | 702.4                        | 29.3       |
| 1081.4                  | 38.8       | 605.9                        | 9.4        |
| 1761                    | 54.7       | 916.8                        | 16.5       |
| 660.6                   | 19.1       | 895.4                        | 14         |
| 904.1                   | 18.2       | 1057.8                       | 76.2       |
| 2322.6                  | 21.3       | 1365.3                       | 24.5       |
| 1054.7                  | 16.9       | 1053.4                       | 56         |
| 881.3                   | 53.5       | 1061.9                       | 24.4       |
| 2497.8                  | 11.8       | 1117.5                       | 63.1       |
| 1052.5                  | 68.3       | 818.4                        | 16.9       |
| 610.5                   | 11         | 1149.3                       | 58.7       |
| 631.1                   | 17.7       | 2947.9                       | 11.3       |
| 2571.6                  | 11.7       | 1192.6                       | 45.6       |
| 1005.1                  | 77.6       | 1731.9                       | 12.9       |
| 810.4                   | 7.9        | 2220.2                       | 61         |
| 1850.8                  | 14.3       | 1153.3                       | 68.4       |
| 2023.7                  | 24         | 1060                         | 37.5       |
| 2770.2                  | 14.1       | 1192.9                       | 14.9       |
| 835.4                   | 11.3       | 1152.5                       | 62.1       |
| 1150.8                  | 72.5       | 799.6                        | 29.9       |
| 2584.9                  | 11.7       | 871.9                        | 22.8       |
| 1852                    | 12.7       | 2245.6                       | 12.8       |
| 1385.3                  | 26         | 1119.8                       | 88         |
| 877.4                   | 12.2       | 1090.8                       | 31         |
| 1054.2                  | 42.1       | *Data from Webb et al., 2011 |            |
| 941.2                   | 10.8       |                              |            |
| 1712                    | 12.9       |                              |            |
| 2117.3                  | 14.8       |                              |            |
| 1164.6                  | 47.2       |                              |            |
| 1657.9                  | 41.2       |                              |            |
| 947.9                   | 21.2       |                              |            |
| 1909.2                  | 12.6       |                              |            |
| 1923.9                  | 15.7       |                              |            |
| 601.5                   | 12         |                              |            |
| 2523.8                  | 11.8       |                              |            |
| 1572.3                  | 40.7       |                              |            |
| 1383.5                  | 31.4       |                              |            |
| 1116.2                  | 18.3       |                              |            |
| 1482.9                  | 26.3       |                              |            |
| 856.2                   | 7.2        |                              |            |
| 743                     | 8          |                              |            |
| 973.3                   | 6.3        |                              |            |
| 1649.3                  | 15.2       |                              |            |
| 945.3                   | 14.2       |                              |            |
| 931.4                   | 7.2        |                              |            |
| 724.2                   | 9.3        |                              |            |
| 930.4                   | 16.4       |                              |            |
| 635.7                   | 18.2       |                              |            |
| 1060.9                  | 88.3       |                              |            |
| 1101.7                  | 45.5       |                              |            |
| 1223.7                  | 17.1       |                              |            |
| 2534.3                  | 11.8       |                              |            |
| 1143.8                  | 43.8       |                              |            |
| 1130.8                  | 14.7       |                              |            |
| 1446.2                  | 17.7       |                              |            |
| 1018.9                  | 24.9       |                              |            |
| 2733.2                  | 18.6       |                              |            |
| 1019                    | 30.7       |                              |            |
| 1030.1                  | 68.7       |                              |            |
| 1331.8                  | 41.6       |                              |            |
| 1248                    | 51.7       |                              |            |
| 1332.5                  | 58.9       |                              |            |
| 937.2                   | 18.5       |                              |            |

**Table DR9. Compiled Zircon U-Pb Ages of Tectonic Blocks (Lesser Himalaya-Himachal) \***

| Zircon U-Pb Age (Ma) |  | Error (Ma) | Zircon U-Pb Age (Ma) |  | Error (Ma) | Zircon U-Pb Age (Ma) |  | Error (Ma) |
|----------------------|--|------------|----------------------|--|------------|----------------------|--|------------|
| 2155                 |  | 85.7       | 2218.9               |  | 62.9       | 2501.9               |  | 18         |
| 2601                 |  | 14.3       | 1916.1               |  | 12.6       | 2372.2               |  | 8.5        |
| 2432.8               |  | 20.2       | 2055.4               |  | 20.3       | 2394.4               |  | 15         |
| 2764.9               |  | 11.5       | 1919.4               |  | 15.8       | 2390                 |  | 99.8       |
| 2345.2               |  | 29.4       | 2065.8               |  | 33.7       | 2406.3               |  | 12.1       |
| 2474.5               |  | 20.1       | 2565.9               |  | 12.5       | 2994.6               |  | 8.1        |
| 2114.8               |  | 14.6       | 2443.7               |  | 23.4       | 2095.1               |  | 23.7       |
| 2307.6               |  | 12         | 1934.8               |  | 18.3       | 2061                 |  | 95.4       |
| 2520.1               |  | 11.8       | 2501.1               |  | 11.8       | 2481.1               |  | 8.4        |
| 2478.2               |  | 13.2       | 2183.2               |  | 37.1       | 3658.7               |  | 7.7        |
| 2232.5               |  | 12.1       | 2021.4               |  | 19.4       | 2514.2               |  | 20.6       |
| 2518.6               |  | 13.8       | 1895.8               |  | 38         | 2406.9               |  | 15.1       |
| 2132.2               |  | 12.4       | 2263.1               |  | 41.3       | 2158.3               |  | 22.2       |
| 2551.7               |  | 11.8       | 1937.3               |  | 12.5       | 1991.9               |  | 29.2       |
| 1981.6               |  | 31.5       | 2373.1               |  | 14.9       | 1939.5               |  | 9          |
| 2030.1               |  | 12.6       | 2027.2               |  | 12.4       | 1915.7               |  | 18.8       |
| 1959.6               |  | 12.5       | 2444.6               |  | 39.3       | 2113.3               |  | 21.1       |
| 1952.8               |  | 12.5       | 2538.5               |  | 11.8       | 1846.6               |  | 93.5       |
| 2280.7               |  | 16.7       | 1947.6               |  | 13.9       | 2555                 |  | 8.4        |
| 1951.2               |  | 12.7       | 2138.2               |  | 12.3       | 2742                 |  | 29.1       |
| 1962.3               |  | 12.6       | 2218.4               |  | 12.1       | 2171.9               |  | 80.3       |
| 2506.4               |  | 31.1       | 2286.4               |  | 53         | 2493.9               |  | 10.3       |
| 2434                 |  | 15.4       | 2742.5               |  | 13         | 1942.6               |  | 9          |
| 2116.2               |  | 12.3       | 2397.7               |  | 65.2       | 2393.2               |  | 16.5       |
| 2552.9               |  | 17.8       | 2033                 |  | 28.4       | 1955.4               |  | 13.9       |
| 1955.4               |  | 12.5       | 2094                 |  | 19         | 2456.8               |  | 9.2        |
| 2356.1               |  | 45.6       | 2665.3               |  | 9          | 2539.1               |  | 9.1        |
| 1945.6               |  | 19.3       | 2410.4               |  | 9          | 1986.1               |  | 33.5       |
| 1965.9               |  | 21.8       | 2343.6               |  | 31.7       | 2434.2               |  | 23.3       |
| 2163.1               |  | 213.1      | 2048.3               |  | 26.7       | 2309.3               |  | 14.8       |
| 2064.2               |  | 12.4       | 1955.3               |  | 21.8       | 2253.5               |  | 157.7      |
| 2016.1               |  | 12.5       | 2077.5               |  | 16.4       | 2127.3               |  | 22.8       |
| 2118.7               |  | 12.5       | 2732.2               |  | 8.2        | 2136                 |  | 46.9       |
| 2111.8               |  | 12.3       | 2217.5               |  | 56.3       | 2446.4               |  | 22.2       |
| 2545.5               |  | 11.7       | 1963.5               |  | 21.6       | 2776.1               |  | 8.2        |
| 1929.9               |  | 27.3       | 1949.5               |  | 20.8       | 2688.1               |  | 30.2       |
| 2445.9               |  | 11.9       | 2512.9               |  | 8.4        | 2480.7               |  | 8.9        |
| 2037                 |  | 16.5       | 2481.5               |  | 8.4        | 1955.5               |  | 12.2       |
| 2373.8               |  | 11.9       | 2136                 |  | 96.7       | 2000.7               |  | 13.7       |
| 1955.3               |  | 15.7       | 2063.8               |  | 8.8        | 2416.1               |  | 58.4       |
| 2061.6               |  | 16.1       | 2715.4               |  | 25.9       | 2041.1               |  | 70.3       |
| 1942.5               |  | 12.6       | 1907.6               |  | 33.6       | 1970                 |  | 56.3       |
| 2390.3               |  | 43.9       | 2737.5               |  | 15.1       | 2141.2               |  | 43.1       |
| 2481.3               |  | 25.8       | 2587.3               |  | 14.1       | 2453.3               |  | 32.6       |
| 1931.8               |  | 12.5       | 2589.6               |  | 25.7       | 2175.6               |  | 51.6       |
| 2011.8               |  | 14.4       | 2298.1               |  | 64.3       | 2135.4               |  | 103.1      |
| 2160.7               |  | 49.1       | 2076.3               |  | 9.4        | 2113.6               |  | 8.8        |
| 2483                 |  | 26.6       | 2411.5               |  | 30.9       | 1960                 |  | 8.9        |
| 2726.1               |  | 11.5       | 2481.2               |  | 8.4        | 2505.6               |  | 12.1       |
| 2383.6               |  | 11.9       | 2255.4               |  | 136.8      | 2726.4               |  | 8.2        |
| 2081.7               |  | 50.4       | 2617.5               |  | 38.1       | 2421.9               |  | 23.4       |
| 1974.1               |  | 12.5       | 2003.3               |  | 8.9        | 2409.6               |  | 18.1       |
| 2588.5               |  | 12.1       | 2004.5               |  | 8.9        | 2149.3               |  | 136.5      |
| 2020.4               |  | 12.4       | 2030.9               |  | 11.7       | 2128.7               |  | 8.8        |
| 2519.6               |  | 11.9       | 2094.3               |  | 35.7       | 2940.6               |  | 88.9       |
| 2416.7               |  | 20.7       | 2001                 |  | 8.9        | 2156.3               |  | 12.1       |
| 2629.8               |  | 13.1       | 1955.8               |  | 30.9       | 2664.6               |  | 16.1       |
| 2395.2               |  | 16         | 2124.1               |  | 29.4       | 1953.1               |  | 23.4       |
| 2458                 |  | 27.4       | 1929.6               |  | 10.1       | 2303.6               |  | 73.2       |
| 2183.4               |  | 12.2       | 2476.7               |  | 12.2       | 2491.6               |  | 38.9       |
| 2264.1               |  | 32.2       | 2571.5               |  | 34.9       | 723.9                |  | 100.6      |
| 2450.9               |  | 12.7       | 2363.4               |  | 10.1       | 613.5                |  | 18.7       |
| 2536.9               |  | 12.4       | 2467.5               |  | 19.8       | 742.2                |  | 44.6       |

| Zircon U-Pb<br>Age (Ma) | Error (Ma) | Zircon U-Pb<br>Age (Ma) | Error (Ma) | Zircon U-Pb<br>Age (Ma) | Error (Ma) | Zircon U-Pb<br>Age (Ma)      | Error (Ma) |
|-------------------------|------------|-------------------------|------------|-------------------------|------------|------------------------------|------------|
| 2583.7                  | 51         | 2401.3                  | 13.3       | 2342.3                  | 12         | 2203.2                       | 18.1       |
| 762                     | 83.8       | 2385.8                  | 11.9       | 2186.1                  | 12.4       | 572                          | 39.4       |
| 824.5                   | 9.6        | 2017.8                  | 12.4       | 1983.9                  | 15.1       | 2262.3                       | 47.9       |
| 704.7                   | 140.5      | 2484.1                  | 28.2       | 2345.8                  | 21.3       | 2490.5                       | 28.2       |
| 570.3                   | 112.8      | 1890.1                  | 14.1       | 2539.7                  | 18.5       | 2679.5                       | 11.6       |
| 2701.2                  | 73         | 2110.8                  | 12.3       | 1844.3                  | 19.6       | 1995.5                       | 118.4      |
| 767.9                   | 57.6       | 2580.8                  | 18.4       | 2354.3                  | 14.8       | 2121.7                       | 13.4       |
| 803.2                   | 56         | 2129.7                  | 26.6       | 2262.3                  | 12.3       | 1988.4                       | 12.6       |
| 1315.8                  | 99.2       | 2176.2                  | 86.1       | 2536.6                  | 11.8       | 2546.1                       | 12         |
| 908.7                   | 30.1       | 2722.3                  | 19.4       | 2056.4                  | 43.7       | *Data from Webb et al., 2011 |            |
| 1807.4                  | 151.3      | 2115.2                  | 12.3       | 2590.9                  | 24.2       |                              |            |
| 1114.1                  | 129        | 2546.7                  | 11.7       | 512.5                   | 13.8       |                              |            |
| 635.1                   | 102.5      | 2702.2                  | 21.5       | 2273.3                  | 12.1       |                              |            |
| 2635.5                  | 155        | 2509.2                  | 17.4       | 2218.3                  | 12.2       |                              |            |
| 603.9                   | 105        | 1859.1                  | 96         | 2694                    | 11.6       |                              |            |
| 2021.3                  | 80.8       | 2692.5                  | 11.7       | 2747.3                  | 11.7       |                              |            |
| 695.6                   | 37.6       | 1991                    | 12.4       | 2518.8                  | 17.7       |                              |            |
| 982.2                   | 21.2       | 2365.3                  | 18.1       | 1819.9                  | 123.6      |                              |            |
| 2051.6                  | 44.8       | 2014.7                  | 24.5       | 2035.5                  | 25.6       |                              |            |
| 2841.7                  | 21.2       | 2875.9                  | 20.7       | 2662.6                  | 11.6       |                              |            |
| 2041.1                  | 12.4       | 2242.5                  | 12.1       | 2092.7                  | 12.3       |                              |            |
| 1903                    | 22.1       | 2043.1                  | 12.4       | 846.1                   | 8.3        |                              |            |
| 2002.7                  | 13.5       | 1905.1                  | 12.6       | 1980.2                  | 19.8       |                              |            |
| 2242.3                  | 22.4       | 2010.7                  | 29.6       | 1943.6                  | 12.6       |                              |            |
| 2558.3                  | 11.7       | 2364.4                  | 12         | 1665.3                  | 145.6      |                              |            |
| 1989.4                  | 12.5       | 2106.8                  | 12.3       | 1827.8                  | 41.7       |                              |            |
| 2013.1                  | 13.7       | 2111.2                  | 39.4       | 2013.3                  | 13.5       |                              |            |
| 2052.3                  | 19.3       | 2323.1                  | 12         | 2539.1                  | 20.1       |                              |            |
| 1997.8                  | 14.1       | 2757.8                  | 12         | 1916                    | 36.7       |                              |            |
| 2008.2                  | 12.4       | 2256.3                  | 36.1       | 2094.5                  | 18.9       |                              |            |
| 2388.8                  | 11.9       | 1967.7                  | 28.1       | 1936.4                  | 12.5       |                              |            |
| 2064.4                  | 12.3       | 2054.5                  | 12.4       | 1954.8                  | 43.4       |                              |            |
| 1905.8                  | 22.9       | 1874.6                  | 14.2       | 2084.7                  | 16.1       |                              |            |
| 2016.9                  | 12.5       | 2366.5                  | 12         | 2205.3                  | 16.7       |                              |            |
| 2390.7                  | 12.3       | 2781.7                  | 11.8       | 469.2                   | 3.3        |                              |            |
| 1919.2                  | 12.6       | 1962.6                  | 18.3       | 2277.7                  | 54         |                              |            |
| 2972.2                  | 14.8       | 2528.4                  | 23         | 2568.8                  | 12         |                              |            |
| 2786.9                  | 11.5       | 2741.6                  | 11.6       | 2148.8                  | 50.9       |                              |            |
| 2042.8                  | 12.4       | 2740.2                  | 11.8       | 2352.7                  | 12.1       |                              |            |
| 2805.3                  | 18.1       | 2895                    | 11.4       | 2024.8                  | 12.6       |                              |            |
| 2025.7                  | 14.6       | 2187.5                  | 12.2       | 2535.9                  | 11.8       |                              |            |
| 2781.7                  | 11.5       | 2034.9                  | 43.4       | 2027                    | 27.7       |                              |            |
| 2033.6                  | 12.4       | 1976                    | 12.5       | 2689.6                  | 12.7       |                              |            |
| 2044.3                  | 12.4       | 2151.4                  | 12.8       | 1799.8                  | 145.4      |                              |            |
| 2579.8                  | 11.7       | 1905.2                  | 36.1       | 2566.2                  | 12.1       |                              |            |
| 2359.9                  | 12         | 1786.2                  | 115        | 2732.6                  | 11.6       |                              |            |
| 2375.5                  | 40.5       | 2060                    | 12.5       | 2292.6                  | 12.1       |                              |            |
| 2678.3                  | 11.7       | 1981.9                  | 13         | 2419.6                  | 64.8       |                              |            |
| 2232                    | 12.1       | 2766.2                  | 11.5       | 2529.4                  | 15.6       |                              |            |
| 1919.9                  | 12.6       | 2836.5                  | 12.9       | 2102.1                  | 69.7       |                              |            |
| 2076.4                  | 34.6       | 2361.4                  | 14.1       | 2509.3                  | 12.2       |                              |            |
| 2272.2                  | 20.9       | 2088.2                  | 18.8       | 2182.3                  | 14.7       |                              |            |
| 2258.5                  | 12.1       | 2405.4                  | 11.9       | 1916.1                  | 25.3       |                              |            |
| 2055.6                  | 29.5       | 2002.5                  | 12.4       | 1851.8                  | 69.9       |                              |            |
| 1924.3                  | 12.5       | 1918.1                  | 12.6       | 2238.8                  | 53.5       |                              |            |
| 2038.1                  | 12.4       | 2152.3                  | 13.9       | 2114.5                  | 37.7       |                              |            |
| 2033.4                  | 18.8       | 2458.6                  | 21.8       | 2067.6                  | 21.8       |                              |            |
| 1822.2                  | 62.8       | 2298.8                  | 19.1       | 2461.2                  | 23.4       |                              |            |
| 2604.5                  | 11.8       | 2298.7                  | 13.1       | 2520                    | 11.8       |                              |            |
| 2127.6                  | 12.3       | 2379.1                  | 12.8       | 2540.1                  | 23.2       |                              |            |
| 2361.4                  | 15.2       | 1928.9                  | 59.7       | 2122.6                  | 12.3       |                              |            |
| 1997.6                  | 12.7       | 2014.1                  | 57.1       | 1056.1                  | 38         |                              |            |
| 2375.1                  | 12         | 2186.2                  | 13.6       | 2338.8                  | 12.6       |                              |            |

## References

- Bosch D, Garrido C J, Bruguier O, et al. Building an island-arc crustal section: Time constraints from a LA-ICP-MS zircon study[J]. *Earth and Planetary Science Letters*. 2011, 309(3-4): 268-279.
- Bouilhol P, Jagoutz O, Hanchar J M, et al. Dating the India–Eurasia collision through arc magmatic records[J]. *Earth and Planetary Science Letters*. 2013, 366: 163-175.
- Bouilhol P, Schaltegger U, Chiaradia M, et al. Timing of juvenile arc crust formation and evolution in the Sapat Complex (Kohistan–Pakistan)[J]. *Chemical Geology*. 2011, 280(3-4): 243-256.
- Boutonnet E, Leloup P H, Arnaud N, et al. Synkinematic magmatism, heterogeneous deformation, and progressive strain localization in a strike-slip shear zone: The case of the right-lateral Karakorum fault[J]. *Tectonics*. 2012, 31: C4012.
- Decelles P G, Gehrels G E, Najman Y, et al. Detrital geochronology and geochemistry of Cretaceous–Early Miocene strata of Nepal: implications for timing and diachroneity of initial Himalayan orogenesis[J]. *Earth and Planetary Science Letters*. 2004, 227(3): 313-330.
- Decelles P G, Gehrels G E, Quade J, et al. Tectonic implications of U-Pb zircon ages of the Himalayan orogenic belt in Nepal[J]. *Science*. 2000, 288(5465): 497-499.
- Dunlap W J, Wysoczanski R. Thermal evidence for early Cretaceous metamorphism in the Shyok suture zone and age of the Khardung volcanic rocks, Ladakh, India[J]. *Journal of Asian Earth Sciences*. 2002, 20(5): 481-490.
- Fraser J E, Searle M P, Parrish R R, et al. Chronology of deformation, metamorphism, and magmatism in the southern Karakoram Mountains[J]. *Geological Society of America Bulletin*. 2001, 113(11): 1443-1455.
- Gehrels G E, Decelles P G, Ojha T P, et al. Geologic and U-Th-Pb geochronologic evidence for early Paleozoic tectonism in the Kathmandu thrust sheet, central Nepal Himalaya[J]. *Geological Society of America Bulletin*. 2006, 118(1-2): 185-198.
- Gehrels G E, Decelles P G, Ojha T P, et al. Geologic and U–Pb geochronologic evidence for early Paleozoic tectonism in the Dadeldhura thrust sheet, far-west Nepal Himalaya[J]. *Journal of Asian Earth Sciences*. 2006, 28(4): 385-408.
- Gehrels G, Kapp P, Decelles P, et al. Detrital zircon geochronology of pre - Tertiary strata in the Tibetan - Himalayan orogen[J]. *Tectonics*. 2011, 30(5).
- Heuberger S, Schaltegger U, Burg J, et al. Age and isotopic constraints on magmatism along the Karakoram-Kohistan Suture Zone, NW Pakistan: Evidence for subduction and continued convergence after India-Asia collision[J]. *Swiss Journal of Geosciences*. 2007, 100(1): 85-107.
- Honegger K, Dietrich V, Frank W et al, 1982. Magmatism and metamorphism in the Ladakh Himalayas (The Indus Tsangpo Suture Zone). *Earth and Planetary Science Letters* 60, 253–292.
- Horton F, Leech M L. Age and origin of granites in the Karakoram shear zone and Greater Himalaya Sequence, NW India[J]. *Lithosphere*. 2013, 5(3): 300-320.
- Jagoutz O E, Burg J, Hussain S, et al. Construction of the granitoid crust of an island arc part I: geochronological and

- geochemical constraints from the plutonic Kohistan (NW Pakistan)[J]. *Contributions to Mineralogy and Petrology*. 2009, 158(6): 739-755.
- Jain A K, Singh S. Tectonics of the southern Asian Plate margin along the Karakoram Shear Zone: Constraints from field observations and U–Pb SHRIMP ages[J]. *Tectonophysics*. 2008, 451(1): 186-205.
- Jonell, T.N., Carter, A., Böning, P., Pahnke, K., and Clift, P.D., 2017, Climatic and glacial impact on erosion patterns and sediment provenance in the Himalayan rain shadow, Zaskar River, NW India: *Geological Society of America Bulletin*, v. 129, no. 7-8, p. 820–836, doi: 10.1130/B31573.1.
- Khan S D, Walker D J, Hall S A, et al. Did the Kohistan-Ladakh island arc collide first with India?[J]. *Geological Society of America Bulletin*. 2009, 121(3-4): 366-384.
- Kohn M J, Paul S K, Corrie S L. The lower Lesser Himalayan sequence: a Paleoproterozoic arc on the northern margin of the Indian plate[J]. *Geological Society of America Bulletin*. 2010, 122(3-4): 323-335.
- Krol M A, Zeitler P K, Copeland P. Episodic unroofing of the Kohistan Batholith, Pakistan: Implications from K - feldspar thermochronology[J]. *Journal of Geophysical Research: Solid Earth* (1978–2012). 1996, 101(B12): 28149-28164.
- Leloup P H, Boutonnet E, Davis W J, et al. Long-lasting intracontinental strike-slip faulting: new evidence from the Karakorum shear zone in the Himalayas[J]. *Terra Nova*. 2011, 23(2): 92-99.
- Mahar M A, Mahéo G, Goodell P C, et al. Age and origin of post collision Baltoro granites, south Karakoram, North Pakistan: Insights from in-situ U–Pb, Hf and oxygen isotopic record of zircons[J]. *Lithos*. 2014, 205: 341-358.
- Martin A J, Burgoyne K D, Kaufman A J, et al. Stratigraphic and tectonic implications of field and isotopic constraints on depositional ages of Proterozoic Lesser Himalayan rocks in central Nepal[J]. *Precambrian Research*. 2011, 185(1): 1-17.
- Martin A J, Decelles P G, Gehrels G E, et al. Isotopic and structural constraints on the location of the Main Central thrust in the Annapurna Range, central Nepal Himalaya[J]. *Geological Society of America Bulletin*. 2005, 117(7-8): 926-944.
- McQuarrie N, Robinson D, Long S, et al. Preliminary stratigraphic and structural architecture of Bhutan: Implications for the along strike architecture of the Himalayan system[J]. *Earth and Planetary Science Letters*. 2008, 272(1): 105-117.
- Myrow P M, Hughes N C, Goodge J W, et al. Extraordinary transport and mixing of sediment across Himalayan central Gondwana during the Cambrian–Ordovician[J]. *Geological Society of America Bulletin*. 2010, 122(9-10): 1660-1670.
- Myrow P M, Hughes N C, Paulsen T S, et al. Integrated tectonostratigraphic analysis of the Himalaya and implications for its tectonic reconstruction[J]. *Earth and Planetary Science Letters*. 2003, 212(3): 433-441.
- Noble S R, Searle M P. Age of crustal melting and leucogranite formation from U-Pb zircon and monazite dating in the western Himalaya, Zaskar, India[J]. *Geology*. 1995, 23(12): 1135-1138.
- Noble S R, Searle M P, Walker C B. Age and tectonic significance of Permian granites in Western Zaskar, High Himalaya[J]. *The Journal of Geology*. 2001, 109(1): 127-135.
- Parrish R R, Hodges V. Isotopic constraints on the age and provenance of the Lesser and Greater Himalayan sequences, Nepalese Himalaya[J]. *Geological Society of America Bulletin*. 1996, 108(7): 904-911.

- Parrish R R, Tirrul R. U-Pb age of the Baltoro granite, northwest Himalaya, and implications for monazite U-Pb systematics[J]. *Geology*. 1989, 17(12): 1076-1079.
- Phillips R J, Parrish R R, Searle M P. Age constraints on ductile deformation and long-term slip rates along the Karakoram fault zone, Ladakh[J]. *Earth and Planetary Science Letters*. 2004, 226(3): 305-319.
- Ravikant V, Wu F, Ji W. Zircon U–Pb and Hf isotopic constraints on petrogenesis of the Cretaceous–Tertiary granites in eastern Karakoram and Ladakh, India[J]. *Lithos*. 2009, 110(1): 153-166.
- Reichardt H, Weinberg R F, Andersson U B, et al. Hybridization of granitic magmas in the source: The origin of the Karakoram Batholith, Ladakh, NW India[J]. *Lithos*. 2010, 116(3-4): 249-272.
- Schaltegger U, Zeilinger G, Frank M, et al. Multiple mantle sources during island arc magmatism: U–Pb and Hf isotopic evidence from the Kohistan arc complex, Pakistan[J]. *Terra Nova*. 2002, 14(6): 461-468.
- Schärer U, Hamet J, Allegre C J, 1984. The Transhimalayas (Gangdese) plutonism in the Ladakh region: a U–Pb and Rb–Sr study. *Earth and Planetary Science Letters* 67, 327–339
- Schärer U, Copeland P, Harrison T M, et al. Age, cooling history, and origin of post-collisional leucogranites in the Karakoram Batholith; a multi-system isotope study[J]. *The Journal of Geology*. 1990, 98(2): 233-251.
- Searle M P, Parrish R R, Tirrul R, et al. Age of crystallization and cooling of the K2 gneiss in the Baltoro Karakoram[J]. *Journal of the Geological Society*. 1990, 147(4): 603-606.
- Sen K, Collins A. Dextral transpression and late Eocene magmatism in the trans-Himalayan Ladakh Batholith (North India): implications for tectono-magmatic evolution of the Indo-Eurasian collisional arc[J]. *International Journal of Earth Sciences*. 2013, 102(7): 1895-1909.
- Shellnutt J G, Lee T, Brookfield M E, et al. Correlation between magmatism of the Ladakh Batholith and plate convergence rates during the India–Eurasia collision[J]. *Gondwana Research*. 2014, 26(3-4): 1051-1059.
- Singh S, Kumar R, Barley M E, et al. SHRIMP U–Pb ages and depth of emplacement of Ladakh Batholith, Eastern Ladakh, India[J]. *Journal of Asian Earth Sciences*. 2007, 30(3): 490-503.
- Spring L, Bussy F, Vannay J, et al. Early Permian granitic dykes of alkaline affinity in the Indian High Himalaya of Upper Lahul and SE Zaskar: geochemical characterization and geotectonic implications[J]. *Geological Society, London, Special Publications*. 1993, 74(1): 251-264.
- St-Onge M R, Rayner N, Searle M P. Zircon age determinations for the Ladakh batholith at Chumathang (Northwest India): Implications for the age of the India–Asia collision in the Ladakh Himalaya[J]. *Tectonophysics*. 2010, 495(3-4): 171-183.
- Upadhyay R, Frisch W, Siebel W. Tectonic implications of new U–Pb zircon ages of the Ladakh batholith, Indus suture zone, northwest Himalaya, India[J]. *Terra Nova*. 2008, 20(4): 309-317.
- Webb, A.A.G., Yin, A., Harrison, T.M., Célérrier, J., Gehrels, G.E., Manning, C.E., and Grove, M., 2011, Cenozoic tectonic history of the Himachal Himalaya (northwestern India) and its constraints on the formation mechanism of the Himalayan orogen: *Geosphere*, v. 7, no. 4, p. 1013–1061.

- Weinberg R F, Dunlap W J. Growth and deformation of the Ladakh Batholith, northwest Himalayas: implications for timing of continental collision and origin of calc - alkaline batholiths[J]. The Journal of Geology. 2000, 108(3): 303-320.
- Weinberg R F, Dunlap W J, Whitehouse M. New field, structural and geochronological data from the Shyok and Nubra valleys, northern Ladakh: linking Kohistan to Tibet[J]. Geological Society, London, Special Publications. 2000, 170(1): 253-275.
- White L T, Ahmad T, Ireland T R, et al. Deconvolving episodic age spectra from zircons of the Ladakh Batholith, northwest Indian Himalaya[J]. Chemical Geology. 2011, 289(3-4): 179-196.
- Zeilinger G, Burg J P, Schaltegger U, et al. New U/Pb and fission track ages and their implication for the tectonic history of the lower Kohistan Arc Complex, northern Pakistan[J]. J. Asian Earth Sci. 2001, 19(3): 79-81.
- Zeitler P K, Chamberlain C P. Petrogenetic and tectonic significance of young leucogranites from the northwestern Himalaya, Pakistan[J]. Tectonics. 1991, 10(4): 729-741.
- Zeitler P K, Chamberlain C P, Smith H A. Synchronous anatexis, metamorphism, and rapid denudation at Nanga Parbat (Pakistan Himalaya)[J]. Geology. 1993, 21(4): 347-350.
