# Supplementary material
Source: publisher figshare collection journal article supplement (https://gsapubs.figshare.com/articles/dataset/_/14582763)
Supplement: Supplementary file 2 [file 1]

Table DR12 Raw data of apatite fission track ages

|                          |             |                  |           |
|--------------------------|-------------|------------------|-----------|
| Sample Number            | 722B-50X-1W | Mineral          | Apatite   |
| Position (#)             | 42          | Glass (U ppm)    | 12.2      |
| Area of Graticule Square | 3.9476E-07  | Irradiation      | UA17-1    |
| No. of Crystals          | 93          | Analyst          | HF        |
| Zeta Factor ± Error      | 343±23      | Count Date       | 2017-12-4 |
| Rho d (% Relative Error) | 1.3463E+06  | Locality         | Indus Fan |
| Nd                       | 2777        | Depositional age | 15.8 Ma   |

|    | Ns | Ni  | Age (Ma) | Age error |
|----|----|-----|----------|-----------|
| 1  | 16 | 127 | 29.02    | 7.96      |
| 2  | 3  | 61  | 11.35    | 6.76      |
| 3  | 19 | 195 | 22.46    | 5.62      |
| 4  | 5  | 74  | 15.58    | 7.28      |
| 5  | 43 | 448 | 22.12    | 3.85      |
| 6  | 49 | 414 | 27.27    | 4.54      |
| 7  | 2  | 11  | 41.84    | 32.30     |
| 8  | 39 | 434 | 20.71    | 3.75      |
| 9  | 11 | 145 | 17.49    | 5.60      |
| 10 | 5  | 116 | 9.94     | 4.59      |
| 11 | 2  | 15  | 30.71    | 23.22     |
| 12 | 6  | 46  | 30.05    | 13.21     |
| 13 | 27 | 328 | 18.98    | 4.02      |
| 14 | 5  | 125 | 9.23     | 4.26      |
| 15 | 13 | 140 | 21.40    | 6.38      |
| 16 | 4  | 73  | 12.64    | 6.55      |
| 17 | 14 | 100 | 32.24    | 9.47      |
| 18 | 8  | 115 | 16.04    | 5.97      |
| 19 | 4  | 76  | 12.14    | 6.29      |
| 20 | 33 | 459 | 16.58    | 3.20      |
| 21 | 7  | 69  | 23.38    | 9.42      |
| 22 | 4  | 81  | 11.39    | 5.89      |
| 23 | 3  | 122 | 5.68     | 3.34      |
| 24 | 7  | 66  | 24.44    | 9.86      |
| 25 | 18 | 110 | 37.67    | 9.93      |
| 26 | 4  | 17  | 54.10    | 30.30     |
| 27 | 4  | 22  | 41.84    | 22.93     |
| 28 | 20 | 235 | 19.62    | 4.77      |
| 29 | 9  | 101 | 20.54    | 7.29      |
| 30 | 5  | 35  | 32.90    | 15.90     |
| 31 | 2  | 22  | 20.96    | 15.55     |
| 32 | 4  | 141 | 6.55     | 3.35      |
| 33 | 12 | 102 | 27.11    | 8.49      |
| 34 | 3  | 25  | 27.65    | 17.00     |
| 35 | 36 | 337 | 24.62    | 4.64      |
| 36 | 10 | 29  | 79.13    | 29.54     |
| 37 | 34 | 233 | 33.60    | 6.60      |
| 38 | 10 | 173 | 13.33    | 4.43      |
| 39 | 15 | 232 | 14.91    | 4.11      |
| 40 | 4  | 75  | 12.30    | 6.37      |
| 41 | 4  | 60  | 15.37    | 8.01      |
| 42 | 7  | 153 | 10.55    | 4.15      |
| 43 | 11 | 68  | 37.24    | 12.38     |
| 44 | 23 | 228 | 23.25    | 5.34      |

|    |    |     |        |       |
|----|----|-----|--------|-------|
| 45 | 25 | 248 | 23.23  | 5.14  |
| 46 | 25 | 267 | 21.58  | 4.76  |
| 47 | 7  | 45  | 35.82  | 14.76 |
| 48 | 10 | 119 | 19.37  | 6.52  |
| 49 | 39 | 241 | 37.26  | 6.93  |
| 50 | 22 | 239 | 21.22  | 4.95  |
| 51 | 19 | 298 | 14.70  | 3.63  |
| 52 | 15 | 95  | 36.35  | 10.41 |
| 53 | 21 | 347 | 13.96  | 3.28  |
| 54 | 23 | 190 | 27.89  | 6.46  |
| 55 | 10 | 119 | 19.37  | 6.52  |
| 56 | 13 | 82  | 36.50  | 11.19 |
| 57 | 34 | 329 | 23.82  | 4.60  |
| 58 | 3  | 20  | 34.54  | 21.52 |
| 59 | 20 | 160 | 28.80  | 7.12  |
| 60 | 34 | 499 | 15.71  | 2.99  |
| 61 | 3  | 31  | 22.31  | 13.58 |
| 62 | 8  | 122 | 15.12  | 5.62  |
| 63 | 4  | 61  | 15.12  | 7.88  |
| 64 | 9  | 110 | 18.86  | 6.67  |
| 65 | 5  | 48  | 24.01  | 11.40 |
| 66 | 6  | 30  | 46.01  | 20.83 |
| 67 | 1  | 9   | 25.60  | 27.05 |
| 68 | 12 | 174 | 15.90  | 4.87  |
| 69 | 10 | 69  | 33.38  | 11.53 |
| 70 | 14 | 212 | 15.23  | 4.33  |
| 71 | 14 | 182 | 17.74  | 5.07  |
| 72 | 67 | 700 | 22.06  | 3.21  |
| 73 | 2  | 17  | 27.11  | 20.35 |
| 74 | 4  | 44  | 20.96  | 11.04 |
| 75 | 19 | 60  | 72.70  | 19.80 |
| 76 | 5  | 117 | 9.86   | 4.55  |
| 77 | 47 | 283 | 38.23  | 6.59  |
| 78 | 11 | 145 | 17.49  | 5.60  |
| 79 | 4  | 57  | 16.18  | 8.45  |
| 80 | 3  | 37  | 18.69  | 11.30 |
| 81 | 6  | 29  | 47.59  | 21.60 |
| 82 | 5  | 61  | 18.90  | 8.89  |
| 83 | 27 | 319 | 19.51  | 4.14  |
| 84 | 7  | 46  | 35.04  | 14.42 |
| 85 | 4  | 72  | 12.81  | 6.64  |
| 86 | 6  | 171 | 8.10   | 3.41  |
| 87 | 18 | 39  | 105.69 | 31.01 |
| 88 | 19 | 169 | 25.91  | 6.52  |
| 89 | 2  | 20  | 23.05  | 17.17 |
| 90 | 7  | 109 | 14.81  | 5.87  |
| 91 | 5  | 77  | 14.98  | 6.99  |
| 92 | 21 | 227 | 21.32  | 5.09  |
| 93 | 13 | 72  | 41.55  | 12.85 |

---

Table DR12 Raw data of apatite fission track ages

|                          |              |                  |           |
|--------------------------|--------------|------------------|-----------|
| Sample Number            | 731B-4X-1W   | Mineral          | Apatite   |
| Position (#)             | 40           | Glass (U ppm)    | 12.2      |
| Area of Graticule Square | 3.9476E-07   | Irradiation      | UA17-1    |
| No. of Crystals          | 80           | Analyst          | HF        |
| Zeta Factor $\pm$ Error  | 343 $\pm$ 23 | Count Date       | 2017-12-5 |
| Rho d (% Relative Error) | 1.3264E+06   | Locality         | Indus Fan |
| Nd                       | 2777         | Depositional age | 18.4 Ma   |

|    | N s | N i | Age (Ma) | Age error |
|----|-----|-----|----------|-----------|
| 1  | 4   | 45  | 20.19    | 10.63     |
| 2  | 28  | 266 | 23.90    | 5.03      |
| 3  | 4   | 39  | 23.29    | 12.33     |
| 4  | 1   | 6   | 37.80    | 40.92     |
| 5  | 12  | 84  | 32.42    | 10.26     |
| 6  | 1   | 7   | 32.42    | 34.73     |
| 7  | 6   | 52  | 26.19    | 11.44     |
| 8  | 3   | 17  | 40.02    | 25.22     |
| 9  | 10  | 231 | 9.84     | 3.25      |
| 10 | 21  | 242 | 19.71    | 4.69      |
| 11 | 17  | 190 | 20.32    | 5.34      |
| 12 | 24  | 252 | 21.63    | 4.86      |
| 13 | 17  | 64  | 60.14    | 16.94     |
| 14 | 22  | 231 | 21.63    | 5.06      |
| 15 | 3   | 45  | 15.15    | 9.09      |
| 16 | 5   | 17  | 66.56    | 34.18     |
| 17 | 6   | 30  | 45.34    | 20.52     |
| 18 | 18  | 230 | 17.78    | 4.52      |
| 19 | 16  | 174 | 20.88    | 5.65      |
| 20 | 4   | 23  | 39.44    | 21.54     |
| 21 | 10  | 66  | 34.38    | 11.91     |
| 22 | 4   | 37  | 24.55    | 13.03     |
| 23 | 2   | 28  | 16.23    | 11.93     |
| 24 | 6   | 70  | 19.47    | 8.39      |
| 25 | 7   | 60  | 26.49    | 10.74     |
| 26 | 4   | 35  | 25.95    | 13.81     |
| 27 | 9   | 97  | 21.07    | 7.49      |
| 28 | 5   | 44  | 25.80    | 12.31     |
| 29 | 4   | 80  | 11.36    | 5.88      |
| 30 | 37  | 301 | 27.90    | 5.24      |
| 31 | 3   | 73  | 9.34     | 5.54      |
| 32 | 21  | 245 | 19.47    | 4.63      |
| 33 | 32  | 222 | 32.71    | 6.59      |
| 34 | 6   | 96  | 14.20    | 6.06      |
| 35 | 7   | 82  | 19.39    | 7.75      |
| 36 | 8   | 123 | 14.78    | 5.49      |
| 37 | 4   | 34  | 26.71    | 14.24     |
| 38 | 8   | 82  | 22.16    | 8.35      |
| 39 | 9   | 186 | 11.00    | 3.83      |
| 40 | 14  | 169 | 18.82    | 5.40      |
| 41 | 6   | 56  | 24.33    | 10.59     |
| 42 | 23  | 124 | 42.06    | 9.99      |
| 43 | 5   | 69  | 16.46    | 7.71      |
| 44 | 1   | 12  | 18.93    | 19.75     |
| 45 | 6   | 63  | 21.63    | 9.36      |

|    |    |     |       |       |
|----|----|-----|-------|-------|
| 46 | 32 | 237 | 30.64 | 6.15  |
| 47 | 7  | 112 | 14.20 | 5.62  |
| 48 | 12 | 179 | 15.23 | 4.66  |
| 49 | 3  | 59  | 11.56 | 6.89  |
| 50 | 5  | 49  | 23.17 | 11.00 |
| 51 | 26 | 267 | 22.11 | 4.80  |
| 52 | 8  | 118 | 15.40 | 5.73  |
| 53 | 9  | 60  | 34.03 | 12.39 |
| 54 | 11 | 141 | 17.72 | 5.68  |
| 55 | 6  | 50  | 27.24 | 11.92 |
| 56 | 6  | 99  | 13.77 | 5.87  |
| 57 | 8  | 92  | 19.75 | 7.41  |
| 58 | 20 | 219 | 20.74 | 5.06  |
| 59 | 23 | 397 | 13.17 | 2.97  |
| 60 | 10 | 168 | 13.53 | 4.50  |
| 61 | 10 | 131 | 17.34 | 5.82  |
| 62 | 8  | 42  | 43.19 | 16.93 |
| 63 | 7  | 114 | 13.95 | 5.52  |
| 64 | 21 | 239 | 19.96 | 4.75  |
| 65 | 21 | 164 | 29.06 | 7.03  |
| 66 | 7  | 100 | 15.90 | 6.32  |
| 67 | 5  | 60  | 18.93 | 8.91  |
| 68 | 4  | 67  | 13.57 | 7.05  |
| 69 | 14 | 92  | 34.52 | 10.19 |
| 70 | 4  | 60  | 15.15 | 7.89  |
| 71 | 8  | 94  | 19.33 | 7.25  |
| 72 | 8  | 75  | 24.22 | 9.16  |
| 73 | 9  | 100 | 20.44 | 7.25  |
| 74 | 4  | 28  | 32.42 | 17.47 |
| 75 | 6  | 28  | 48.56 | 22.11 |
| 76 | 6  | 116 | 11.76 | 4.99  |
| 77 | 27 | 300 | 20.44 | 4.35  |
| 78 | 5  | 33  | 34.38 | 16.67 |
| 79 | 11 | 82  | 30.44 | 10.00 |
| 80 | 4  | 36  | 25.23 | 13.41 |

---

Table DR12 Raw data of apatite fission track ages

|                          |              |                  |           |
|--------------------------|--------------|------------------|-----------|
| Sample Number            | 731C-5W-4W   | Mineral          | Apatite   |
| Position (#)             | 39           | Glass (U ppm)    | 12.2      |
| Area of Graticule Square | 3.9476E-07   | Irradiation      | UA17-1    |
| No. of Crystals          | 70           | Analyst          | HF        |
| Zeta Factor $\pm$ Error  | 343 $\pm$ 23 | Count Date       | 2017-12-6 |
| Rho d (% Relative Error) | 1.3165E+06   | Locality         | Indus Fan |
| Nd                       | 2777         | Depositional age | 22.0 Ma   |

|    | N s | N i | Age (Ma) | Age error |
|----|-----|-----|----------|-----------|
| 1  | 18  | 75  | 53.96    | 14.65     |
| 2  | 24  | 105 | 51.40    | 12.17     |
| 3  | 10  | 82  | 27.48    | 9.40      |
| 4  | 7   | 63  | 25.04    | 10.13     |
| 5  | 10  | 103 | 21.88    | 7.41      |
| 6  | 16  | 116 | 31.07    | 8.56      |
| 7  | 13  | 106 | 27.63    | 8.34      |
| 8  | 9   | 62  | 32.69    | 11.88     |
| 9  | 30  | 283 | 23.89    | 4.88      |
| 10 | 5   | 50  | 22.54    | 10.69     |
| 11 | 15  | 151 | 22.39    | 6.26      |
| 12 | 50  | 280 | 40.19    | 6.78      |
| 13 | 16  | 139 | 25.94    | 7.08      |
| 14 | 1   | 4   | 56.20    | 62.95     |
| 15 | 3   | 30  | 22.54    | 13.74     |
| 16 | 23  | 225 | 23.04    | 5.29      |
| 17 | 6   | 50  | 27.04    | 11.83     |
| 18 | 7   | 69  | 22.86    | 9.21      |
| 19 | 23  | 234 | 22.15    | 5.08      |
| 20 | 26  | 279 | 21.01    | 4.55      |
| 21 | 18  | 199 | 20.39    | 5.22      |
| 22 | 10  | 58  | 38.81    | 13.56     |
| 23 | 15  | 175 | 19.32    | 5.37      |
| 24 | 11  | 128 | 19.37    | 6.24      |
| 25 | 15  | 189 | 17.89    | 4.96      |
| 26 | 18  | 190 | 21.35    | 5.47      |
| 27 | 3   | 28  | 24.15    | 14.76     |
| 28 | 2   | 24  | 18.79    | 13.89     |
| 29 | 60  | 408 | 33.12    | 5.13      |
| 30 | 4   | 62  | 14.55    | 7.57      |
| 31 | 6   | 53  | 25.51    | 11.13     |
| 32 | 28  | 299 | 21.11    | 4.42      |
| 33 | 1   | 8   | 28.16    | 29.93     |
| 34 | 6   | 61  | 22.17    | 9.61      |
| 35 | 1   | 11  | 20.49    | 21.45     |
| 36 | 5   | 85  | 13.27    | 6.18      |
| 37 | 3   | 42  | 16.11    | 9.69      |
| 38 | 1   | 7   | 32.17    | 34.47     |
| 39 | 1   | 3   | 74.82    | 86.56     |
| 40 | 2   | 18  | 25.04    | 18.74     |
| 41 | 25  | 174 | 32.36    | 7.28      |
| 42 | 19  | 128 | 33.43    | 8.54      |
| 43 | 15  | 142 | 23.81    | 6.67      |
| 44 | 7   | 57  | 27.67    | 11.25     |
| 45 | 2   | 13  | 34.64    | 26.42     |

|    |    |     |       |       |
|----|----|-----|-------|-------|
| 46 | 9  | 40  | 50.60 | 19.00 |
| 47 | 15 | 159 | 21.26 | 5.93  |
| 48 | 1  | 7   | 32.17 | 34.47 |
| 49 | 14 | 158 | 19.97 | 5.74  |
| 50 | 9  | 84  | 24.15 | 8.63  |
| 51 | 9  | 80  | 25.35 | 9.09  |
| 52 | 7  | 71  | 22.22 | 8.94  |
| 53 | 9  | 91  | 22.29 | 7.94  |
| 54 | 16 | 120 | 30.03 | 8.26  |
| 55 | 5  | 54  | 20.87 | 9.86  |
| 56 | 8  | 59  | 30.54 | 11.70 |
| 57 | 3  | 32  | 21.13 | 12.84 |
| 58 | 5  | 36  | 31.28 | 15.09 |
| 59 | 24 | 224 | 24.15 | 5.45  |
| 60 | 8  | 60  | 30.03 | 11.50 |
| 61 | 25 | 172 | 32.73 | 7.37  |
| 62 | 34 | 322 | 23.80 | 4.60  |
| 63 | 14 | 155 | 20.36 | 5.86  |
| 64 | 18 | 130 | 31.19 | 8.14  |
| 65 | 18 | 185 | 21.93 | 5.63  |
| 66 | 6  | 74  | 18.28 | 7.86  |
| 67 | 6  | 31  | 43.55 | 19.66 |
| 68 | 8  | 80  | 22.54 | 8.50  |
| 69 | 13 | 112 | 26.15 | 7.88  |
| 70 | 2  | 12  | 37.52 | 28.78 |

---

Table DR12 Raw data of apatite fission track ages

|                          |            |                  |           |
|--------------------------|------------|------------------|-----------|
| Sample Number            | 731C-8R-4W | Mineral          | Apatite   |
| Position (#)             | 38         | Glass (U ppm)    | 12.2      |
| Area of Graticule Square | 3.9476E-07 | Irradiation      | UA17-1    |
| No. of Crystals          | 70         | Analyst          | HF        |
| Zeta Factor ± Error      | 343±23     | Count Date       | 2017-12-9 |
| Rho d (% Relative Error) | 1.3066E+06 | Locality         | Indus Fan |
| Nd                       | 2777       | Depositional age | 25.3 Ma   |

|    | Ns | Ni  | Age (Ma) | Age error |
|----|----|-----|----------|-----------|
| 1  | 25 | 141 | 39.61    | 9.03      |
| 2  | 22 | 172 | 28.60    | 6.77      |
| 3  | 20 | 210 | 21.31    | 5.20      |
| 4  | 8  | 50  | 35.75    | 13.84     |
| 5  | 13 | 81  | 35.86    | 11.00     |
| 6  | 15 | 113 | 29.68    | 8.41      |
| 7  | 5  | 28  | 39.89    | 19.57     |
| 8  | 8  | 70  | 25.56    | 9.70      |
| 9  | 11 | 55  | 44.66    | 15.08     |
| 10 | 9  | 75  | 26.83    | 9.65      |
| 11 | 5  | 29  | 38.52    | 18.84     |
| 12 | 8  | 144 | 12.44    | 4.60      |
| 13 | 11 | 73  | 33.68    | 11.14     |
| 14 | 2  | 15  | 29.81    | 22.53     |
| 15 | 6  | 40  | 33.52    | 14.86     |
| 16 | 37 | 256 | 32.30    | 6.11      |
| 17 | 2  | 16  | 27.95    | 21.05     |
| 18 | 14 | 167 | 18.76    | 5.38      |
| 19 | 12 | 82  | 32.71    | 10.36     |
| 20 | 19 | 179 | 23.74    | 5.96      |
| 21 | 13 | 111 | 26.19    | 7.89      |
| 22 | 8  | 72  | 24.85    | 9.42      |
| 23 | 8  | 68  | 26.31    | 10.00     |
| 24 | 8  | 62  | 28.85    | 11.02     |
| 25 | 2  | 11  | 40.61    | 31.35     |
| 26 | 15 | 91  | 36.83    | 10.58     |
| 27 | 6  | 66  | 20.34    | 8.79      |
| 28 | 22 | 155 | 31.73    | 7.56      |
| 29 | 11 | 92  | 26.74    | 8.73      |
| 30 | 4  | 30  | 29.81    | 16.00     |
| 31 | 4  | 32  | 27.95    | 14.95     |
| 32 | 4  | 36  | 24.85    | 13.21     |
| 33 | 44 | 333 | 29.54    | 5.17      |
| 34 | 7  | 60  | 26.09    | 10.58     |
| 35 | 14 | 132 | 23.72    | 6.87      |
| 36 | 20 | 183 | 24.44    | 6.00      |
| 37 | 9  | 62  | 32.45    | 11.79     |
| 38 | 5  | 32  | 34.92    | 16.97     |
| 39 | 1  | 7   | 31.93    | 34.21     |
| 40 | 12 | 103 | 26.05    | 8.15      |
| 41 | 2  | 17  | 26.31    | 19.75     |
| 42 | 2  | 17  | 26.31    | 19.75     |
| 43 | 12 | 107 | 25.08    | 7.83      |
| 44 | 1  | 8   | 27.95    | 29.71     |
| 45 | 8  | 53  | 33.73    | 13.01     |

|    |    |     |       |       |
|----|----|-----|-------|-------|
| 46 | 8  | 58  | 30.83 | 11.83 |
| 47 | 2  | 17  | 26.31 | 19.75 |
| 48 | 2  | 21  | 21.31 | 15.84 |
| 49 | 17 | 108 | 35.18 | 9.50  |
| 50 | 17 | 99  | 38.36 | 10.42 |
| 51 | 7  | 70  | 22.37 | 9.00  |
| 52 | 3  | 26  | 25.80 | 15.84 |
| 53 | 2  | 18  | 24.85 | 18.60 |
| 54 | 41 | 337 | 27.20 | 4.88  |
| 55 | 3  | 25  | 26.83 | 16.50 |
| 56 | 6  | 37  | 36.23 | 16.15 |
| 57 | 4  | 34  | 26.31 | 14.03 |
| 58 | 6  | 45  | 29.81 | 13.12 |
| 59 | 7  | 49  | 31.93 | 13.09 |
| 60 | 2  | 21  | 21.31 | 15.84 |
| 61 | 1  | 7   | 31.93 | 34.21 |
| 62 | 8  | 56  | 31.93 | 12.27 |
| 63 | 11 | 81  | 30.36 | 9.98  |
| 64 | 8  | 88  | 20.34 | 7.64  |
| 65 | 6  | 52  | 25.80 | 11.27 |
| 66 | 1  | 8   | 27.95 | 29.71 |
| 67 | 10 | 73  | 30.62 | 10.54 |
| 68 | 17 | 124 | 30.65 | 8.21  |
| 69 | 4  | 33  | 27.10 | 14.47 |
| 70 | 10 | 60  | 37.24 | 12.98 |

---



Table DR12 Raw data of apatite fission track ages

|                          |              |                  |            |
|--------------------------|--------------|------------------|------------|
| Sample Number            | 731C-13W-4W  | Mineral          | Apatite    |
| Position (#)             | 36           | Glass (U ppm)    | 12.2       |
| Area of Graticule Square | 3.9476E-07   | Irradiation      | UA17-1     |
| No. of Crystals          | 85           | Analyst          | HF         |
| Zeta Factor $\pm$ Error  | 343 $\pm$ 23 | Count Date       | 2017-12-10 |
| Rho d (% Relative Error) | 1.2867E+06   | Locality         | Indus Fan  |
| Nd                       | 2777         | Depositional age | 27 Ma      |

|    | Ns | Ni  | Age (Ma) | Age error |
|----|----|-----|----------|-----------|
| 1  | 4  | 28  | 31.45    | 16.95     |
| 2  | 65 | 417 | 34.31    | 5.16      |
| 3  | 19 | 147 | 28.46    | 7.22      |
| 4  | 38 | 429 | 19.52    | 3.57      |
| 5  | 20 | 350 | 12.60    | 3.03      |
| 6  | 4  | 24  | 36.67    | 19.97     |
| 7  | 52 | 382 | 29.97    | 4.90      |
| 8  | 16 | 136 | 25.91    | 7.08      |
| 9  | 20 | 131 | 33.60    | 8.40      |
| 10 | 1  | 5   | 43.98    | 48.28     |
| 11 | 17 | 132 | 28.36    | 7.57      |
| 12 | 21 | 97  | 47.60    | 11.93     |
| 13 | 6  | 32  | 41.24    | 18.57     |
| 14 | 28 | 251 | 24.57    | 5.19      |
| 15 | 9  | 54  | 36.67    | 13.45     |
| 16 | 26 | 127 | 45.02    | 10.19     |
| 17 | 11 | 88  | 27.52    | 9.01      |
| 18 | 5  | 39  | 28.23    | 13.55     |
| 19 | 34 | 259 | 28.90    | 5.64      |
| 20 | 23 | 141 | 35.90    | 8.45      |
| 21 | 70 | 295 | 52.15    | 7.83      |
| 22 | 5  | 30  | 36.67    | 17.90     |
| 23 | 16 | 136 | 25.91    | 7.08      |
| 24 | 8  | 33  | 53.27    | 21.32     |
| 25 | 5  | 25  | 43.98    | 21.76     |
| 26 | 9  | 69  | 28.72    | 10.37     |
| 27 | 13 | 45  | 63.44    | 20.46     |
| 28 | 11 | 97  | 24.98    | 8.13      |
| 29 | 6  | 42  | 31.45    | 13.90     |
| 30 | 4  | 22  | 40.00    | 21.92     |
| 31 | 20 | 73  | 60.18    | 15.76     |
| 32 | 8  | 33  | 53.27    | 21.32     |
| 33 | 7  | 41  | 37.57    | 15.58     |
| 34 | 16 | 117 | 30.11    | 8.29      |
| 35 | 12 | 93  | 28.41    | 8.94      |
| 36 | 9  | 76  | 26.08    | 9.37      |
| 37 | 14 | 143 | 21.57    | 6.22      |
| 38 | 6  | 37  | 35.69    | 15.90     |
| 39 | 12 | 99  | 26.69    | 8.37      |
| 40 | 11 | 100 | 24.23    | 7.88      |
| 41 | 19 | 125 | 33.45    | 8.56      |
| 42 | 42 | 242 | 38.18    | 6.92      |
| 43 | 39 | 219 | 39.18    | 7.34      |
| 44 | 5  | 52  | 21.18    | 10.03     |
| 45 | 18 | 126 | 31.45    | 8.22      |

|    |    |     |       |       |
|----|----|-----|-------|-------|
| 46 | 19 | 165 | 25.36 | 6.39  |
| 47 | 9  | 53  | 37.36 | 13.72 |
| 48 | 4  | 26  | 33.86 | 18.34 |
| 49 | 11 | 94  | 25.77 | 8.41  |
| 50 | 11 | 101 | 23.99 | 7.80  |
| 51 | 7  | 51  | 30.22 | 12.36 |
| 52 | 6  | 61  | 21.67 | 9.39  |
| 53 | 5  | 34  | 32.37 | 15.67 |
| 54 | 4  | 25  | 35.21 | 19.12 |
| 55 | 13 | 89  | 32.15 | 9.81  |
| 56 | 13 | 91  | 31.45 | 9.58  |
| 57 | 10 | 107 | 20.59 | 6.96  |
| 58 | 4  | 22  | 40.00 | 21.92 |
| 59 | 5  | 38  | 28.97 | 13.93 |
| 60 | 7  | 51  | 30.22 | 12.36 |
| 61 | 2  | 14  | 31.45 | 23.87 |
| 62 | 4  | 35  | 25.17 | 13.40 |
| 63 | 6  | 37  | 35.69 | 15.90 |
| 64 | 28 | 238 | 25.91 | 5.48  |
| 65 | 22 | 197 | 24.60 | 5.79  |
| 66 | 32 | 193 | 36.48 | 7.41  |
| 67 | 5  | 23  | 47.79 | 23.82 |
| 68 | 16 | 101 | 34.86 | 9.69  |
| 69 | 26 | 185 | 30.94 | 6.83  |
| 70 | 8  | 70  | 25.17 | 9.56  |
| 71 | 15 | 86  | 38.37 | 11.07 |
| 72 | 11 | 74  | 32.72 | 10.82 |
| 73 | 15 | 101 | 32.69 | 9.33  |
| 74 | 10 | 82  | 26.85 | 9.19  |
| 75 | 21 | 126 | 36.67 | 9.01  |
| 76 | 12 | 84  | 31.45 | 9.95  |
| 77 | 6  | 68  | 19.44 | 8.39  |
| 78 | 20 | 68  | 64.58 | 17.03 |
| 79 | 15 | 85  | 38.82 | 11.20 |
| 80 | 4  | 28  | 31.45 | 16.95 |
| 81 | 20 | 132 | 33.35 | 8.33  |
| 82 | 2  | 15  | 29.36 | 22.19 |
| 83 | 6  | 66  | 20.03 | 8.65  |
| 84 | 17 | 146 | 25.64 | 6.81  |
| 85 | 10 | 82  | 26.85 | 9.19  |

---

Table DR12 Raw data of apatite fission track ages

|                          |              |                  |            |
|--------------------------|--------------|------------------|------------|
| Sample Number            | 731C-22R-1W  | Mineral          | Apatite    |
| Position (#)             | 33           | Glass (U ppm)    | 12.2       |
| Area of Graticule Square | 3.9476E-07   | Irradiation      | UA17-1     |
| No. of Crystals          | 74           | Analyst          | HF         |
| Zeta Factor $\pm$ Error  | 343 $\pm$ 23 | Count Date       | 2017-12-12 |
| Rho d (% Relative Error) | 1.2569E+06   | Locality         | Indus Fan  |
| Nd                       | 2777         | Depositional age | 29.3 Ma    |

|    | Ns | Ni  | Age (Ma) | Age error |
|----|----|-----|----------|-----------|
| 1  | 17 | 80  | 45.64    | 12.60     |
| 2  | 11 | 67  | 35.29    | 11.74     |
| 3  | 5  | 76  | 14.17    | 6.61      |
| 4  | 2  | 8   | 53.67    | 42.59     |
| 5  | 27 | 156 | 37.20    | 8.18      |
| 6  | 4  | 30  | 28.68    | 15.39     |
| 7  | 13 | 88  | 31.77    | 9.69      |
| 8  | 6  | 36  | 35.83    | 15.99     |
| 9  | 8  | 73  | 23.58    | 8.93      |
| 10 | 6  | 75  | 17.22    | 7.40      |
| 11 | 14 | 115 | 26.19    | 7.63      |
| 12 | 3  | 11  | 58.52    | 38.33     |
| 13 | 6  | 61  | 21.17    | 9.18      |
| 14 | 2  | 7   | 61.30    | 49.33     |
| 15 | 7  | 52  | 28.95    | 11.83     |
| 16 | 5  | 28  | 38.38    | 18.82     |
| 17 | 8  | 33  | 52.05    | 20.83     |
| 18 | 7  | 32  | 46.98    | 19.88     |
| 19 | 6  | 41  | 31.47    | 13.93     |
| 20 | 12 | 56  | 46.03    | 14.99     |
| 21 | 2  | 10  | 42.97    | 33.42     |
| 22 | 22 | 143 | 33.08    | 7.92      |
| 23 | 30 | 127 | 50.72    | 10.89     |
| 24 | 15 | 71  | 45.38    | 13.28     |
| 25 | 3  | 20  | 32.25    | 20.09     |
| 26 | 14 | 84  | 35.83    | 10.64     |
| 27 | 18 | 80  | 48.32    | 13.05     |
| 28 | 8  | 54  | 31.86    | 12.27     |
| 29 | 12 | 130 | 19.87    | 6.15      |
| 30 | 12 | 64  | 40.29    | 12.98     |
| 31 | 2  | 11  | 39.07    | 30.16     |
| 32 | 5  | 19  | 56.48    | 28.66     |
| 33 | 2  | 10  | 42.97    | 33.42     |
| 34 | 5  | 38  | 28.30    | 13.61     |
| 35 | 25 | 203 | 26.49    | 5.91      |
| 36 | 41 | 202 | 43.60    | 8.06      |
| 37 | 18 | 101 | 38.30    | 10.16     |
| 38 | 32 | 283 | 24.33    | 4.84      |
| 39 | 8  | 68  | 25.31    | 9.62      |
| 40 | 1  | 4   | 53.67    | 60.12     |
| 41 | 12 | 56  | 46.03    | 14.99     |
| 42 | 13 | 66  | 42.32    | 13.18     |
| 43 | 5  | 26  | 41.32    | 20.38     |
| 44 | 17 | 88  | 41.51    | 11.37     |
| 45 | 6  | 27  | 47.72    | 21.79     |

|    |    |     |       |       |
|----|----|-----|-------|-------|
| 46 | 4  | 37  | 23.26 | 12.35 |
| 47 | 10 | 81  | 26.56 | 9.09  |
| 48 | 33 | 143 | 49.55 | 10.17 |
| 49 | 5  | 27  | 39.79 | 19.57 |
| 50 | 8  | 26  | 65.99 | 27.07 |
| 51 | 15 | 82  | 39.31 | 11.37 |
| 52 | 7  | 52  | 28.95 | 11.83 |
| 53 | 13 | 111 | 25.20 | 7.59  |
| 54 | 17 | 106 | 34.48 | 9.32  |
| 55 | 17 | 101 | 36.18 | 9.81  |
| 56 | 3  | 16  | 40.29 | 25.50 |
| 57 | 6  | 31  | 41.59 | 18.77 |
| 58 | 17 | 133 | 27.49 | 7.34  |
| 59 | 5  | 24  | 44.75 | 22.22 |
| 60 | 13 | 95  | 29.43 | 8.94  |
| 61 | 2  | 13  | 33.08 | 25.23 |
| 62 | 30 | 189 | 34.12 | 7.12  |
| 63 | 10 | 61  | 35.24 | 12.27 |
| 64 | 23 | 117 | 42.24 | 10.07 |
| 65 | 3  | 15  | 42.97 | 27.34 |
| 66 | 10 | 83  | 25.92 | 8.86  |
| 67 | 17 | 123 | 29.72 | 7.97  |
| 68 | 21 | 178 | 25.38 | 6.12  |
| 69 | 22 | 101 | 46.78 | 11.48 |
| 70 | 2  | 11  | 39.07 | 30.16 |
| 71 | 31 | 187 | 35.64 | 7.34  |
| 72 | 20 | 85  | 50.52 | 13.04 |
| 73 | 8  | 26  | 65.99 | 27.07 |
| 74 | 8  | 30  | 57.23 | 23.12 |

---
