# Supplementary material
Source: publisher figshare collection journal article supplement (https://gsapubs.figshare.com/articles/dataset/_/14582763)
Supplement: Supplementary file 3 [file 1]

Table DR11 Raw data of zircon U-Pb ages of sample 722B-50X-1W

| Grain    | Apparent Ages (Ma)                |       |                                  |       |                                  |       |                                   |       |       |                                   |     |                                  |     |                                  |     |                                   | Corr.% discordant |                                    | Best Age (Ma) | 1σ   |                                    |
|----------|-----------------------------------|-------|----------------------------------|-------|----------------------------------|-------|-----------------------------------|-------|-------|-----------------------------------|-----|----------------------------------|-----|----------------------------------|-----|-----------------------------------|-------------------|------------------------------------|---------------|------|------------------------------------|
|          | $^{207}\text{Pb}/^{206}\text{Pb}$ | 1σ    | $^{207}\text{Pb}/^{235}\text{U}$ | 1σ    | $^{206}\text{Pb}/^{238}\text{U}$ | 1σ    | $^{208}\text{Pb}/^{232}\text{Th}$ | 1σ    | U/Th  | $^{207}\text{Pb}/^{206}\text{Pb}$ | 1σ  | $^{207}\text{Pb}/^{235}\text{U}$ | 1σ  | $^{206}\text{Pb}/^{238}\text{U}$ | 1σ  | $^{208}\text{Pb}/^{232}\text{Th}$ | 1σ                | $^{206}/^{238}$<br>$^{207}/^{235}$ |               |      | $^{207}/^{206}$<br>$^{206}/^{238}$ |
|          |                                   |       |                                  |       |                                  |       |                                   |       |       |                                   |     |                                  |     |                                  |     |                                   |                   |                                    |               |      |                                    |
| M1-2-140 | 0.091                             | 0.011 | 0.036                            | 0.004 | 0.003                            | 9E-05 | 0.001                             | 5E-05 | 1.112 | 73                                | 346 | 18                               | 3   | 17.4                             | 0.5 | 17                                | 1                 | 3.448276                           | 76.16438      | 17.4 | 0.5                                |
| M1-2-56  | 0.081                             | 0.005 | 0.07                             | 0.004 | 0.006                            | 1E-04 | 0.041                             | 0.002 | 57.07 |                                   | 60  | 38                               | 0.9 | 38.6                             | 0.7 | 177                               | 78                | -1.554404                          | \             | 38.6 | 0.7                                |
| M1-2-163 | 0.048                             | 0.006 | 0.042                            | 0.005 | 0.006                            | 2E-04 | 0.003                             | 1E-04 | 1.467 | 84                                | 197 | 42                               | 5   | 41                               | 1   | 51                                | 2                 | 2.439024                           | 51.19048      | 41   | 1                                  |
| M1-2-95  | 0.057                             | 0.005 | 0.063                            | 0.006 | 0.008                            | 2E-04 | 0.003                             | 1E-04 | 1.777 |                                   | 186 | 50                               | 4   | 51                               | 1   | 52                                | 3                 | -1.960784                          | \             | 51   | 1                                  |
| M1-2-102 | 0.067                             | 0.004 | 0.087                            | 0.006 | 0.009                            | 2E-04 | 0.003                             | 1E-04 | 1.355 | 379                               | 239 | 68                               | 7   | 60                               | 1   | 58.6                              | 0.9               | 13.33333                           | 84.16887      | 60   | 1                                  |
| M1-2-155 | 0.049                             | 0.003 | 0.073                            | 0.005 | 0.011                            | 2E-04 | 0.003                             | 9E-05 | 1.025 | 139                               | 117 | 72                               | 5   | 69                               | 1   | 65                                | 2                 | 4.347826                           | 50.35971      | 69   | 1                                  |
| M1-2-167 | 0.051                             | 0.002 | 0.098                            | 0.003 | 0.014                            | 2E-04 | 0.004                             | 7E-05 | 0.059 | 260                               | 50  | 94                               | 3   | 88                               | 1   | 78                                | 1                 | 6.818182                           | 66.15385      | 88   | 1                                  |
| M1-2-32  | 0.052                             | 0.001 | 0.102                            | 0.002 | 0.014                            | 2E-04 | 0.003                             | 4E-05 | 0.179 | 273                               | 29  | 99                               | 2   | 92                               | 1   | 63.2                              | 0.8               | 7.608696                           | 66.30037      | 92   | 1                                  |
| M1-2-119 | 0.051                             | 0.002 | 0.103                            | 0.005 | 0.015                            | 3E-04 | 0.004                             | 1E-04 | 0.827 | 224                               | 78  | 100                              | 5   | 94                               | 2   | 90                                | 2                 | 6.382979                           | 58.03571      | 94   | 2                                  |
| M1-2-49  | 0.062                             | 0.003 | 0.134                            | 0.007 | 0.016                            | 3E-04 | 0.006                             | 2E-04 | 2.322 | 249                               | 165 | 105                              | 7   | 99                               | 2   | 98                                | 1                 | 6.060606                           | 60.24096      | 99   | 2                                  |
| M1-2-136 | 0.049                             | 0.003 | 0.106                            | 0.005 | 0.016                            | 2E-04 | 0.005                             | 1E-04 | 0.968 | 171                               | 90  | 103                              | 5   | 100                              | 1   | 97                                | 2                 | 3                                  | 41.52047      | 100  | 1                                  |
| M1-2-141 | 0.052                             | 0.002 | 0.115                            | 0.004 | 0.016                            | 2E-04 | 0.007                             | 2E-04 | 8.507 | 95                                | 81  | 103                              | 3   | 103                              | 1   | 103                               | 2                 | 0                                  | -8.421053     | 103  | 1                                  |
| M1-2-13  | 0.055                             | 0.003 | 0.14                             | 0.008 | 0.018                            | 3E-04 | 0.008                             | 3E-04 | 3.698 | 429                               | 104 | 133                              | 7   | 117                              | 2   | 160                               | 6                 | 13.67521                           | 72.72727      | 117  | 2                                  |
| M1-2-90  | 0.053                             | 0.004 | 0.134                            | 0.009 | 0.018                            | 4E-04 | 0.008                             | 3E-04 | 2.435 | 332                               | 119 | 128                              | 8   | 117                              | 2   | 169                               | 6                 | 9.401709                           | 64.75904      | 117  | 2                                  |
| M1-2-15  | 0.064                             | 0.004 | 0.196                            | 0.011 | 0.022                            | 4E-04 | 0.021                             | 1E-03 | 14.53 | 67                                | 137 | 135                              | 8   | 139                              | 2   | 139                               | 21                | -2.877698                          | -107.4627     | 139  | 2                                  |
| M1-2-165 | 0.056                             | 0.004 | 0.187                            | 0.015 | 0.024                            | 6E-04 | 0.014                             | 7E-04 | 4.855 | 471                               | 133 | 174                              | 12  | 153                              | 3   | 290                               | 13                | 13.72549                           | 67.51592      | 153  | 3                                  |
| M1-2-179 | 0.072                             | 0.004 | 0.283                            | 0.014 | 0.028                            | 5E-04 | 0.018                             | 7E-04 | 7.912 | 473                               | 155 | 200                              | 12  | 177                              | 3   | 174                               | 3                 | 12.99435                           | 62.57928      | 177  | 3                                  |
| M1-2-152 | 0.064                             | 0.002 | 0.253                            | 0.007 | 0.029                            | 4E-04 | 0.014                             | 3E-04 | 8.103 | 439                               | 84  | 199                              | 6   | 179                              | 2   | 177                               | 2                 | 11.17318                           | 59.22551      | 179  | 2                                  |
| M1-2-131 | 0.052                             | 0.002 | 0.205                            | 0.006 | 0.029                            | 3E-04 | 0.008                             | 2E-04 | 2.3   | 281                               | 45  | 190                              | 5   | 183                              | 2   | 168                               | 3                 | 3.825137                           | 34.87544      | 183  | 2                                  |
| M1-2-57  | 0.057                             | 0.002 | 0.294                            | 0.012 | 0.038                            | 6E-04 | 0.033                             | 6E-04 | 2.527 | 473                               | 64  | 262                              | 10  | 238                              | 4   | 647                               | 13                | 10.08403                           | 49.68288      | 238  | 4                                  |
| M1-2-38  | 0.06                              | 0.005 | 0.336                            | 0.029 | 0.041                            | 9E-04 | 0.01                              | 4E-04 | 1.11  | 597                               | 151 | 294                              | 22  | 258                              | 6   | 196                               | 7                 | 13.95349                           | 56.78392      | 258  | 6                                  |
| M1-2-169 | 0.065                             | 0.003 | 0.467                            | 0.019 | 0.052                            | 9E-04 | 0.02                              | 6E-04 | 3.459 | 516                               | 128 | 347                              | 16  | 323                              | 6   | 319                               | 5                 | 7.430341                           | 37.4031       | 323  | 6                                  |
| M1-2-23  | 0.057                             | 0.002 | 0.412                            | 0.013 | 0.052                            | 6E-04 | 0.022                             | 8E-04 | 16.69 | 417                               | 76  | 338                              | 9   | 326                              | 4   | 325                               | 3                 | 3.680982                           | 21.82254      | 326  | 4                                  |
| M1-2-161 | 0.054                             | 0.001 | 0.391                            | 0.01  | 0.052                            | 8E-04 | 0.016                             | 4E-04 | 12.3  | 386                               | 30  | 335                              | 7   | 328                              | 5   | 321                               | 8                 | 2.134146                           | 15.02591      | 328  | 5                                  |
| M1-2-69  | 0.056                             | 0.002 | 0.43                             | 0.014 | 0.056                            | 8E-04 | 0.022                             | 5E-04 | 2.216 | 460                               | 48  | 363                              | 10  | 348                              | 5   | 449                               | 9                 | 4.310345                           | 24.34783      | 348  | 5                                  |
| M1-2-72  | 0.061                             | 0.002 | 0.493                            | 0.017 | 0.059                            | 8E-04 | 0.029                             | 1E-03 | 11.17 | 393                               | 97  | 368                              | 12  | 364                              | 5   | 364                               | 5                 | 1.098901                           | 7.379135      | 364  | 5                                  |
| M1-2-133 | 0.059                             | 0.001 | 0.494                            | 0.012 | 0.061                            | 7E-04 | 0.019                             | 3E-04 | 0.94  | 563                               | 34  | 407                              | 8   | 381                              | 4   | 384                               | 5                 | 6.824147                           | 32.32682      | 381  | 4                                  |
| M1-2-07  | 0.062                             | 0.003 | 0.521                            | 0.025 | 0.061                            | 9E-04 | 0.016                             | 4E-04 | 1.707 | 661                               | 77  | 426                              | 17  | 384                              | 6   | 321                               | 9                 | 10.9375                            | 41.9062       | 384  | 6                                  |
| M1-2-39  | 0.058                             | 0.001 | 0.508                            | 0.012 | 0.063                            | 8E-04 | 0.029                             | 8E-04 | 36    | 481                               | 60  | 407                              | 8   | 394                              | 4   | 392                               | 5                 | 3.299492                           | 18.08732      | 394  | 4                                  |
| M1-2-65  | 0.059                             | 0.002 | 0.521                            | 0.016 | 0.064                            | 9E-04 | 0.029                             | 6E-04 | 2.796 | 584                               | 42  | 426                              | 11  | 397                              | 6   | 570                               | 11                | 7.304786                           | 32.02055      | 397  | 6                                  |
| M1-2-04  | 0.063                             | 0.002 | 0.557                            | 0.017 | 0.064                            | 8E-04 | 0.018                             | 3E-04 | 0.722 | 701                               | 43  | 450                              | 11  | 402                              | 5   | 369                               | 5                 | 11.9403                            | 42.65335      | 402  | 5                                  |
| M1-2-60  | 0.056                             | 0.001 | 0.516                            | 0.012 | 0.067                            | 9E-04 | 0.023                             | 5E-04 | 14.75 | 461                               | 29  | 423                              | 8   | 415                              | 5   | 453                               | 9                 | 1.927711                           | 9.978308      | 415  | 5                                  |
| M1-2-170 | 0.066                             | 0.003 | 0.615                            | 0.024 | 0.068                            | 0.001 | 0.018                             | 5E-04 | 2.206 | 796                               | 52  | 487                              | 15  | 423                              | 7   | 352                               | 10                | 15.13002                           | 46.8593       | 423  | 7                                  |
| M1-2-105 | 0.062                             | 0.002 | 0.607                            | 0.016 | 0.071                            | 0.001 | 0.029                             | 7E-04 | 9.791 | 533                               | 75  | 455                              | 11  | 440                              | 6   | 438                               | 6                 | 3.409091                           | 17.44841      | 440  | 6                                  |
| M1-2-11  | 0.058                             | 0.001 | 0.572                            | 0.012 | 0.071                            | 7E-04 | 0.007                             | 2E-04 | 3.67  | 536                               | 27  | 460                              | 8   | 445                              | 4   | 151                               | 3                 | 3.370787                           | 16.97761      | 445  | 4                                  |
| M1-2-25  | 0.064                             | 0.006 | 0.629                            | 0.055 | 0.071                            | 0.002 | 0.019                             | 8E-04 | 1.4   | 737                               | 148 | 495                              | 35  | 445                              | 10  | 376                               | 16                | 11.23596                           | 39.62008      | 445  | 10                                 |
| M1-2-174 | 0.059                             | 0.003 | 0.589                            | 0.026 | 0.073                            | 0.001 | 0.033                             | 8E-04 | 2.359 | 563                               | 66  | 470                              | 17  | 451                              | 8   | 658                               | 16                | 4.21286                            | 19.89343      | 451  | 8                                  |
| M1-2-10  | 0.065                             | 0.002 | 0.652                            | 0.022 | 0.073                            | 9E-04 | 0.02                              | 4E-04 | 2.164 | 768                               | 51  | 509                              | 14  | 454                              | 5   | 391                               | 9                 | 12.11454                           | 40.8854.      |      |                                    |

|          |       |       |       |       |       |       |       |       |       |      |    |      |    |      |    |      |    |          |          |      |    |
|----------|-------|-------|-------|-------|-------|-------|-------|-------|-------|------|----|------|----|------|----|------|----|----------|----------|------|----|
| M1-2-125 | 0.109 | 0.002 | 3.894 | 0.082 | 0.26  | 0.004 | 0.077 | 0.001 | 3.808 | 1774 | 19 | 1612 | 17 | 1491 | 20 | 1494 | 26 | 8.115359 | 15.95265 | 1774 | 19 |
| M1-2-17  | 0.111 | 0.002 | 4.175 | 0.078 | 0.274 | 0.003 | 0.068 | 0.001 | 3.576 | 1809 | 19 | 1669 | 15 | 1561 | 14 | 1337 | 20 | 6.918642 | 13.70923 | 1809 | 19 |
| M1-2-124 | 0.111 | 0.002 | 4.313 | 0.087 | 0.281 | 0.004 | 0.037 | 7E-04 | 2.469 | 1822 | 17 | 1696 | 17 | 1596 | 21 | 742  | 13 | 6.265664 | 12.40395 | 1822 | 17 |
| M1-2-142 | 0.147 | 0.003 | 7.008 | 0.156 | 0.347 | 0.004 | 0.111 | 0.002 | 1.5   | 2193 | 57 | 2044 | 26 | 1900 | 22 | 1870 | 21 | 7.578947 | 13.36069 | 2193 | 57 |
| M1-2-91  | 0.159 | 0.003 | 8.526 | 0.168 | 0.389 | 0.006 | 0.056 | 0.002 | 28.71 | 2447 | 16 | 2289 | 18 | 2116 | 26 | 1092 | 31 | 8.175803 | 13.52677 | 2447 | 16 |
| M1-2-47  | 0.241 | 0.005 | 16.55 | 0.364 | 0.497 | 0.006 | 0.079 | 0.003 | 16.9  | 3129 | 19 | 2909 | 21 | 2602 | 28 | 1537 | 53 | 11.79862 | 16.84244 | 3129 | 19 |

Table DR11 Raw data of zircon U-Pb ages of sample 731A-41X-3W

| Grain    | Apparent Ages (Ma)                |       |                                  |       |                                  |       |                                   |       |       | Corr.% discordant                 |     |                                  |    |                                  | Best Age<br>(Ma) | 1σ                                |     |                            |                    |      |     |
|----------|-----------------------------------|-------|----------------------------------|-------|----------------------------------|-------|-----------------------------------|-------|-------|-----------------------------------|-----|----------------------------------|----|----------------------------------|------------------|-----------------------------------|-----|----------------------------|--------------------|------|-----|
|          | $^{207}\text{Pb}/^{206}\text{Pb}$ | 1σ    | $^{207}\text{Pb}/^{235}\text{U}$ | 1σ    | $^{206}\text{Pb}/^{238}\text{U}$ | 1σ    | $^{208}\text{Pb}/^{232}\text{Th}$ | 1σ    | U/Th  | $^{207}\text{Pb}/^{206}\text{Pb}$ | 1σ  | $^{207}\text{Pb}/^{235}\text{U}$ | 1σ | $^{206}\text{Pb}/^{238}\text{U}$ | 1σ               | $^{208}\text{Pb}/^{232}\text{Th}$ | 1σ  | $^{206}/^{238}$<br>207/235 | 207/206<br>206/238 |      |     |
|          |                                   |       |                                  |       |                                  |       |                                   |       |       |                                   |     |                                  |    |                                  |                  |                                   |     |                            |                    |      |     |
| M3-2-104 | 0.051                             | 0.004 | 0.026                            | 0.002 | 0.004                            | 6E-05 | 0.001                             | 2E-05 | 1.74  | 250                               | 198 | 26                               | 2  | 23.6                             | 0.4              | 23.3                              | 0.3 | 10.16949                   | 90.56              | 23.6 | 0.4 |
| M3-2-68  | 0.046                             | 0.002 | 0.029                            | 0.001 | 0.005                            | 8E-05 | 0.008                             | 0.005 | 129.3 |                                   | 87  | 29                               | 1  | 29.4                             | 0.5              | 154                               | 101 | -1.360544                  | \                  | 29.4 | 0.5 |
| M3-2-20  | 0.054                             | 0.002 | 0.066                            | 0.002 | 0.009                            | 9E-05 | 0.002                             | 4E-05 | 0.09  | 354                               | 42  | 65                               | 2  | 57.2                             | 0.6              | 49.1                              | 0.8 | 13.63636                   | 83.84181           | 57.2 | 0.6 |
| M3-2-12  | 0.054                             | 0.002 | 0.08                             | 0.003 | 0.011                            | 2E-04 | 0.003                             | 7E-05 | 2.21  | 382                               | 71  | 78                               | 3  | 68                               | 1                | 65                                | 1   | 14.70588                   | 82.19895           | 68   | 1   |
| M3-2-55  | 0.046                             | 0.005 | 0.071                            | 0.008 | 0.011                            | 2E-04 | 0.004                             | 3E-05 | 0.11  |                                   | 229 | 69                               | 8  | 71                               | 1                | 71.9                              | 0.7 | -2.816901                  | \                  | 71   | 1   |
| M3-2-28  | 0.046                             | 0.002 | 0.075                            | 0.003 | 0.012                            | 2E-04 | 0.004                             | 3E-04 | 2.27  |                                   | 103 | 73                               | 3  | 76                               | 1                | 83                                | 5   | -3.947368                  | \                  | 76   | 1   |
| M2-3-117 | 0.051                             | 0.006 | 0.082                            | 0.009 | 0.012                            | 3E-04 | 0.004                             | 7E-05 | 1.12  | 224                               | 254 | 80                               | 9  | 76                               | 2                | 75                                | 1   | 5.263158                   | 66.07143           | 76   | 2   |
| M3-2-43  | 0.049                             | 0.004 | 0.087                            | 0.007 | 0.013                            | 3E-04 | 0.004                             | 8E-05 | 1.86  | 154                               | 195 | 84                               | 7  | 82                               | 2                | 82                                | 2   | 2.439024                   | 46.75325           | 82   | 2   |
| M3-2-136 | 0.05                              | 0.006 | 0.105                            | 0.012 | 0.015                            | 3E-04 | 0.005                             | 1E-04 | 1.18  | 205                               | 262 | 101                              | 11 | 97                               | 2                | 96                                | 2   | 4.123711                   | 52.68293           | 97   | 2   |
| M3-2-92  | 0.055                             | 0.002 | 0.12                             | 0.004 | 0.016                            | 2E-04 | 0.005                             | 7E-05 | 1     | 399                               | 58  | 115                              | 4  | 102                              | 1                | 96                                | 1   | 12.7451                    | 74.43609           | 102  | 1   |
| M3-2-145 | 0.05                              | 0.004 | 0.113                            | 0.009 | 0.016                            | 3E-04 | 0.005                             | 2E-04 | 1.67  | 191                               | 144 | 108                              | 8  | 105                              | 2                | 108                               | 4   | 2.857143                   | 45.02618           | 105  | 2   |
| M3-2-52  | 0.051                             | 0.002 | 0.118                            | 0.004 | 0.017                            | 2E-04 | 0.005                             | 8E-05 | 1.41  | 244                               | 58  | 113                              | 4  | 107                              | 1                | 96                                | 2   | 5.607477                   | 56.14754           | 107  | 1   |
| M3-2-198 | 0.052                             | 0.004 | 0.127                            | 0.009 | 0.018                            | 3E-04 | 0.006                             | 9E-05 | 5.22  | 300                               | 160 | 121                              | 8  | 112                              | 2                | 111                               | 2   | 8.035714                   | 62.66667           | 112  | 2   |
| M3-2-137 | 0.053                             | 0.003 | 0.139                            | 0.008 | 0.019                            | 3E-04 | 0.035                             | 0.002 | 70.71 | 319                               | 95  | 132                              | 7  | 122                              | 2                | 701                               | 48  | 8.196721                   | 61.75549           | 122  | 2   |
| M3-2-91  | 0.055                             | 0.001 | 0.158                            | 0.003 | 0.021                            | 2E-04 | 0.005                             | 5E-05 | 0.05  | 429                               | 26  | 149                              | 3  | 132                              | 1                | 109                               | 1   | 12.87879                   | 69.23077           | 132  | 1   |
| M3-2-124 | 0.051                             | 0.001 | 0.149                            | 0.003 | 0.021                            | 2E-04 | 0.006                             | 7E-05 | 0.06  | 241                               | 29  | 141                              | 3  | 135                              | 1                | 117                               | 1   | 4.444444                   | 43.9834            | 135  | 1   |
| M3-2-163 | 0.049                             | 0.001 | 0.144                            | 0.003 | 0.021                            | 3E-04 | 0.006                             | 7E-05 | 0.07  | 166                               | 31  | 136                              | 3  | 135                              | 2                | 116                               | 1   | 0.740741                   | 18.6747            | 135  | 2   |
| M3-2-151 | 0.053                             | 0.003 | 0.159                            | 0.008 | 0.022                            | 3E-04 | 0.005                             | 1E-04 | 1     | 331                               | 91  | 149                              | 7  | 138                              | 2                | 92                                | 2   | 7.971014                   | 58.30816           | 138  | 2   |
| M3-2-109 | 0.051                             | 0.002 | 0.16                             | 0.006 | 0.023                            | 3E-04 | 0.007                             | 2E-04 | 13.51 | 259                               | 99  | 151                              | 6  | 144                              | 2                | 143                               | 3   | 4.861111                   | 44.40154           | 144  | 2   |
| M3-2-31  | 0.05                              | 0.003 | 0.169                            | 0.009 | 0.025                            | 4E-04 | 0.008                             | 1E-04 | 2.64  | 183                               | 125 | 158                              | 8  | 157                              | 2                | 157                               | 2   | 0.636943                   | 14.20765           | 157  | 2   |
| M3-2-100 | 0.055                             | 0.003 | 0.214                            | 0.01  | 0.028                            | 4E-04 | 0.036                             | 0.001 | 16.16 | 429                               | 80  | 197                              | 8  | 178                              | 2                | 178                               | 25  | 10.67416                   | 58.50816           | 178  | 2   |
| M3-2-110 | 0.056                             | 0.002 | 0.218                            | 0.006 | 0.028                            | 3E-04 | 0.007                             | 3E-04 | 17.24 | 439                               | 40  | 200                              | 5  | 181                              | 2                | 139                               | 5   | 10.49724                   | 58.76993           | 181  | 2   |
| M3-2-75  | 0.052                             | 8E-04 | 0.218                            | 0.003 | 0.031                            | 3E-04 | 0.008                             | 8E-05 | 0.13  | 270                               | 17  | 200                              | 3  | 194                              | 2                | 163                               | 2   | 3.092784                   | 28.14815           | 194  | 2   |
| M3-2-179 | 0.052                             | 0.001 | 0.223                            | 0.006 | 0.031                            | 4E-04 | 0.018                             | 6E-04 | 29.7  | 274                               | 38  | 204                              | 5  | 198                              | 3                | 365                               | 11  | 3.030303                   | 27.73723           | 198  | 3   |
| M3-2-180 | 0.058                             | 0.002 | 0.263                            | 0.01  | 0.033                            | 5E-04 | 0.01                              | 3E-04 | 2.97  | 524                               | 58  | 237                              | 8  | 209                              | 3                | 207                               | 5   | 13.39713                   | 60.1145            | 209  | 3   |
| M3-2-105 | 0.053                             | 1E-03 | 0.28                             | 0.005 | 0.038                            | 4E-04 | 0.009                             | 1E-04 | 2.12  | 333                               | 23  | 251                              | 4  | 242                              | 2                | 180                               | 2   | 3.719008                   | 27.32733           | 242  | 2   |
| M3-2-159 | 0.059                             | 0.002 | 0.321                            | 0.013 | 0.04                             | 6E-04 | 0.013                             | 3E-04 | 2.55  | 550                               | 64  | 283                              | 10 | 251                              | 4                | 257                               | 6   | 12.749                     | 54.36364           | 251  | 4   |
| M3-2-64  | 0.056                             | 0.002 | 0.318                            | 0.009 | 0.041                            | 5E-04 | 0.013                             | 1E-04 | 6.18  | 449                               | 71  | 280                              | 7  | 260                              | 3                | 258                               | 3   | 7.692308                   | 42.09354           | 260  | 3   |
| M3-2-102 | 0.058                             | 0.001 | 0.329                            | 0.008 | 0.041                            | 4E-04 | 0.017                             | 3E-04 | 2.93  | 529                               | 33  | 289                              | 6  | 260                              | 3                | 332                               | 5   | 11.15385                   | 50.85066           | 260  | 3   |
| M3-2-61  | 0.054                             | 0.002 | 0.387                            | 0.017 | 0.052                            | 7E-04 | 0.016                             | 5E-04 | 7.02  | 366                               | 105 | 332                              | 12 | 328                              | 4                | 327                               | 9   | 1.219512                   | 10.38251           | 328  | 4   |
| M3-2-174 | 0.062                             | 0.003 | 0.461                            | 0.018 | 0.054                            | 8E-04 | 0.023                             | 6E-04 | 3.44  | 672                               | 60  | 385                              | 13 | 339                              | 5                | 452                               | 11  | 13.56932                   | 49.55357           | 339  | 5   |
| M3-2-17  | 0.058                             | 0.002 | 0.477                            | 0.019 | 0.06                             | 7E-04 | 0.019                             | 2E-04 | 5.35  | 519                               | 94  | 396                              | 13 | 375                              | 5                | 372                               | 4   | 5.6                        | 27.74566           | 375  | 5   |
| M3-2-10  | 0.059                             | 0.002 | 0.55                             | 0.015 | 0.068                            | 8E-04 | 0.021                             | 3E-04 | 28.42 | 567                               | 66  | 445                              | 10 | 422                              | 5                | 419                               | 5   | 5.450237                   | 25.57319           | 422  | 5   |
| M3-2-182 | 0.062                             | 0.001 | 0.593                            | 0.014 | 0.07                             | 9E-04 | 0.012                             | 2E-04 | 2.03  | 670                               | 29  | 473                              | 9  | 433                              | 5                | 242                               | 4   | 9.237875                   | 35.37313           | 433  | 5   |
| M3-2-93  | 0.065                             | 0.001 | 0.626                            | 0.01  | 0.07                             | 6E-04 | 0.021                             | 3E-04 | 4.22  | 783                               | 19  | 494                              | 6  | 434                              | 4                | 428                               | 5   | 13.82488                   | 44.57216           | 434  | 4   |
| M3-2-82  | 0.067                             | 0.002 | 0.679                            | 0.015 | 0.073                            | 7E-04 | 0.02                              | 3E-04 | 1.3   | 846                               | 29  | 526                              | 9  | 455                              | 4                | 402                               | 5   | 15.6044                    | 46.21749           | 455  | 4   |
| M3-2-155 | 0.061                             | 0.002 | 0.644                            | 0.025 | 0.076                            | 0.001 | 0.009                             | 3E-04 | 2.35  | 645                               | 59  | 505                              | 15 | 474                              | 7                | 186                               | 6   | 6.540084                   | 26.51163           | 474  | 7   |
| M3-2-108 | 0.06                              | 0.002 | 0.644                            | 0.017 | 0.078                            | 9E-04 | 0.024                             | 4E-04 | 3.13  | 596                               | 37  | 505                              | 10 | 485                              | 5                | 480                               | 9   | 4.123711                   | 18.62416           | 485  | 5   |
| M3-2-183 | 0.058                             | 0.001 | 0.629                            | 0.013 | 0.079                            | 1E-03 | 0.017                             | 2E-04 | 1.7   | 515                               | 24  | 496                              | 8  | 491                              | 6                | 342                               | 5   | 1.01833                    | 4.660194           | 491  | 6   |
| M3-2-171 | 0.064                             | 0.005 | 0.718                            | 0.051 | 0.082                            | 0.002 | 0.027                             | 8E-04 | 1.02  | 738                               | 116 | 550                              | 30 | 505                              | 10               | 545                               | 16  | 8.910891                   | 31.57182           | 505  | 10  |
| M3-2-65  | 0.06                              | 0.002 | 0.7                              | 0.016 | 0.085                            | 1E-03 | 0.026                             | 3E-04 | 3.81  | 591                               | 57  | 539                              | 10 | 526                              | 6                | 525                               | 5   | 2.471483                   | 10.99831           | 526  | 6   |
| M3-2-177 | 0.069                             | 0.005 | 0.813                            | 0.053 | 0.086                            | 0.001 | 0.026                             | 4E-04 | 2.87  | 895                               | 142 | 604                              | 30 | 529                              | 8                | 519                               | 8   | 14.17769                   | 40.89385           | 529  | 8   |
| M3-2-161 | 0.058                             | 0.002 | 0.693                            | 0.021 | 0.087                            | 0.001 | 0.027                             | 3E-04 | 6.3   | 526                               | 75  | 535                              | 13 | 537                              | 6                | 537                               | 6   | -0.372439                  | -2.091255          | 537  | 6   |
| M3-2-176 | 0.07                              | 0.002 | 0.844                            | 0.021 | 0.088                            | 0.001 | 0.011                             | 3E-04 | 3.94  | 917                               | 30  | 621                              | 11 | 543                              | 7                | 212                               | 5   | 14.36464                   | 40.78517           | 543  | 7   |
| M3-2-162 | 0.067                             | 0.003 | 0.825                            | 0.038 | 0.09                             | 0.001 | 0.027                             | 4E-04 | 13.4  | 826                               | 103 | 611                              | 21 | 554                              | 8                | 546                               | 7   | 10.28881                   | 32.92978           | 554  | 8   |
| M3-2-58  | 0.058                             | 0.001 | 0.725                            | 0.013 | 0.091                            | 0.001 | 0.016                             | 3E-04 | 6.18  | 516                               | 22  | 553                              | 8  | 562                              | 6                | 324                               | 6   | -1.601423                  | -8.914729          | 562  | 6   |
| M3-2-70  | 0.063                             | 0.002 | 0.791                            | 0.02  | 0.092                            | 0.001 | 0.024                             | 3E-04 | 0.85  | 692                               | 35  | 591                              | 12 | 565                              | 6                | 484                               | 7   | 4.60177                    | 18.3526            | 565  | 6   |
| M2-3-113 | 0.063                             | 0.001 | 0.803                            | 0.017 | 0.092                            | 1E-03 | 0.027                             | 4E-04 | 1.61  | 716                               | 27  | 599                              | 10 | 568                              | 6                | 535                               | 7   | 5.457746                   | 20.67039           | 568  | 6   |
| M3-2-167 | 0.067                             | 0.002 | 0.865                            | 0.031 | 0.093                            | 0.001 | 0.009                             | 4E-04 | 3.5   | 851                               | 50  | 633                              | 17 | 573                              | 8                | 190                               | 8   | 10.4712                    | 32.66745           | 573  | 8   |
| M3-2-97  | 0.063                             | 0.001 | 0.835                            | 0.013 | 0.096                            | 9E-04 | 0.033                             | 4E-04 | 2.38  | 705                               | 19  | 616                              | 7  | 592                              | 5                | 650                               | 7   | 4.054054                   | 16.02837           | 592  | 5   |
| M3-2-18  | 0.067                             | 0.002 | 0.889                            | 0.031 | 0.096                            | 0.001 | 0.023                             | 4E-04 | 0.84  | 828                               | 50  | 646                              | 17 | 594                              | 7                | 466                               | 9   | 8.754209                   | 28.26087           | 594  | 7   |
| M3-2-56  | 0.066                             | 0.002 | 0.883                            | 0.021 | 0.097                            | 0.001 | 0.028                             | 4E-04 | 1.35  | 807                               | 29  | 643                              | 11 | 596                              | 7                | 551                               | 8   | 7.885906                   | 26.14622           | 596  | 7   |
| M3-2-84  | 0.072                             | 0.001 | 0.967                            | 0.018 | 0.097                            | 9E-04 | 0.026                             | 3E-04 | 0.52  | 999                               | 22  | 687                              | 9  | 596                              | 5                | 510                               | 6   | 15.26846                   | 40.34034           | 596  | 5   |
| M3-2-157 | 0.072                             | 0.002 | 0.961                            | 0.02  | 0.097                            | 0.001 | 0.009                             | 2E-04 | 1.7   | 986                               | 24  | 684                              | 11 | 596                              | 7                | 184                               | 3   | 14.7651                    | 39.55375           | 596  | 7   |
| M3-2-73  | 0.06                              | 0.002 | 0.808                            | 0.027 | 0.098                            | 0.001 | 0.03                              | 3E-04 | 2.81  | 598                               | 77  | 601                              | 15 | 602                              | 6                | 602                               | 6   | -0.166113                  | -0.668896          | 602  | 6   |
| M3-2-173 | 0.067                             | 0.001 | 0.903                            | 0.019 | 0.098                            | 0.001 | 0.04                              | 5E-04 | 1.14  | 830                               | 25  | 653                              | 10 | 603                              | 7                | 786                               | 10  | 8.291874                   | 27.3494            | 603  | 7   |
| M3-2-13  | 0.061                             | 0.004 | 0.828                            | 0.05  | 0.099                            | 0.002 | 0.03                              | 4E-04 | 1.65  | 639                               | 138 | 613                              | 28 | 606                              | 9                | 605                               | 7   | 1.155116                   | 5.164319           | 606  | 9   |
| M3-2-49  | 0.064                             | 0.001 | 0.876                            | 0.016 | 0.099                            | 0.001 | 0.025                             | 3E-04 | 1.23  | 750                               | 19  | 639                              | 9  | 608                              | 7                |                                   |     |                            |                    |      |     |

|          |       |       |       |       |       |       |       |       |       |      |    |      |    |      |    |      |    |           |           |      |    |
|----------|-------|-------|-------|-------|-------|-------|-------|-------|-------|------|----|------|----|------|----|------|----|-----------|-----------|------|----|
| M3-2-103 | 0.078 | 0.001 | 1.727 | 0.03  | 0.162 | 0.002 | 0.038 | 6E-04 | 4.16  | 1135 | 19 | 1019 | 11 | 966  | 9  | 744  | 11 | 5.486542  | 14.88987  | 966  | 9  |
| M3-2-78  | 0.089 | 0.001 | 2     | 0.03  | 0.162 | 0.002 | 0.015 | 2E-04 | 2.26  | 1413 | 15 | 1115 | 10 | 969  | 9  | 296  | 4  | 15.06708  | 31.42251  | 969  | 9  |
| M3-2-90  | 0.077 | 0.002 | 1.756 | 0.033 | 0.165 | 0.002 | 0.047 | 6E-04 | 1.11  | 1121 | 22 | 1029 | 12 | 986  | 9  | 936  | 12 | 4.361055  | 12.04282  | 986  | 9  |
| M3-2-36  | 0.076 | 0.001 | 1.738 | 0.03  | 0.167 | 0.002 | 0.013 | 2E-04 | 1.43  | 1084 | 16 | 1023 | 11 | 994  | 12 | 269  | 4  | 2.917505  | 8.302583  | 994  | 12 |
| M3-2-181 | 0.076 | 0.001 | 1.759 | 0.036 | 0.167 | 0.002 | 0.046 | 7E-04 | 2.81  | 1103 | 21 | 1031 | 13 | 997  | 12 | 915  | 14 | 3.410231  | 9.610154  | 997  | 12 |
| M3-2-45  | 0.073 | 0.001 | 1.84  | 0.031 | 0.182 | 0.002 | 0.019 | 3E-04 | 1.6   | 1024 | 16 | 1060 | 11 | 1078 | 13 | 377  | 5  | -1.669759 | -5.273438 | 1024 | 16 |
| M3-2-53  | 0.08  | 0.001 | 2.266 | 0.033 | 0.205 | 0.002 | 0.049 | 6E-04 | 6.33  | 1198 | 13 | 1202 | 10 | 1202 | 13 | 971  | 11 | 0         | -0.33389  | 1198 | 13 |
| M3-2-146 | 0.08  | 0.001 | 1.958 | 0.034 | 0.177 | 0.002 | 0.049 | 6E-04 | 1.61  | 1208 | 18 | 1101 | 12 | 1049 | 11 | 958  | 12 | 4.957102  | 13.16225  | 1208 | 18 |
| M3-2-122 | 0.085 | 0.001 | 2.603 | 0.037 | 0.223 | 0.002 | 0.046 | 5E-04 | 0.1   | 1305 | 14 | 1301 | 11 | 1300 | 12 | 911  | 9  | 0.076923  | 0.383142  | 1305 | 14 |
| M3-2-38  | 0.088 | 0.001 | 2.87  | 0.048 | 0.237 | 0.003 | 0.044 | 6E-04 | 1.89  | 1382 | 15 | 1374 | 13 | 1369 | 16 | 861  | 11 | 0.36523   | 0.940666  | 1382 | 15 |
| M3-2-03  | 0.095 | 0.003 | 2.88  | 0.067 | 0.221 | 0.003 | 0.065 | 0.002 | 39.27 | 1522 | 52 | 1377 | 17 | 1285 | 16 | 1269 | 29 | 7.159533  | 15.57162  | 1522 | 52 |
| M2-3-114 | 0.095 | 0.002 | 3.061 | 0.071 | 0.234 | 0.003 | 0.028 | 0.001 | 6.28  | 1528 | 26 | 1423 | 18 | 1353 | 14 | 554  | 20 | 5.173688  | 11.45288  | 1528 | 26 |
| M3-2-172 | 0.095 | 0.002 | 2.407 | 0.044 | 0.183 | 0.002 | 0.024 | 4E-04 | 6.25  | 1534 | 18 | 1245 | 13 | 1084 | 12 | 469  | 9  | 14.8524   | 29.33507  | 1534 | 18 |
| M3-2-140 | 0.096 | 0.003 | 3.134 | 0.086 | 0.238 | 0.003 | 0.07  | 8E-04 | 2.12  | 1542 | 58 | 1441 | 21 | 1374 | 15 | 1362 | 14 | 4.876274  | 10.89494  | 1542 | 58 |
| M3-2-191 | 0.1   | 0.002 | 3.333 | 0.069 | 0.242 | 0.003 | 0.044 | 7E-04 | 1.3   | 1626 | 20 | 1489 | 16 | 1395 | 16 | 864  | 13 | 6.738351  | 14.20664  | 1626 | 20 |
| M3-2-33  | 0.106 | 0.001 | 3.76  | 0.06  | 0.258 | 0.003 | 0.069 | 9E-04 | 2.96  | 1730 | 13 | 1584 | 13 | 1477 | 17 | 1344 | 16 | 7.244414  | 14.62428  | 1730 | 13 |
| M3-2-46  | 0.107 | 0.002 | 4.335 | 0.073 | 0.294 | 0.004 | 0.07  | 1E-03 | 3.09  | 1748 | 14 | 1700 | 14 | 1662 | 19 | 1366 | 18 | 2.286402  | 4.919908  | 1748 | 14 |
| M3-2-158 | 0.111 | 0.002 | 5.04  | 0.091 | 0.33  | 0.004 | 0.072 | 1E-03 | 2.29  | 1812 | 17 | 1826 | 15 | 1839 | 19 | 1410 | 19 | -0.706906 | -1.490066 | 1812 | 17 |
| M3-2-69  | 0.114 | 0.002 | 5.177 | 0.08  | 0.331 | 0.003 | 0.095 | 0.002 | 33.65 | 1856 | 34 | 1849 | 13 | 1842 | 17 | 1841 | 29 | 0.380022  | 0.75431   | 1856 | 34 |
| M3-2-94  | 0.116 | 0.002 | 4.939 | 0.066 | 0.31  | 0.003 | 0.076 | 0.001 | 17.79 | 1888 | 12 | 1809 | 11 | 1741 | 14 | 1488 | 21 | 3.905801  | 7.786017  | 1888 | 12 |
| M3-2-63  | 0.147 | 0.005 | 8.691 | 0.242 | 0.428 | 0.006 | 0.12  | 0.001 | 0.7   | 2313 | 54 | 2306 | 25 | 2298 | 26 | 2296 | 26 | 0.348129  | 0.648508  | 2313 | 54 |
| M3-2-132 | 0.151 | 0.003 | 8.605 | 0.181 | 0.413 | 0.005 | 0.027 | 8E-04 | 1.75  | 2361 | 20 | 2297 | 19 | 2226 | 23 | 537  | 15 | 3.189578  | 5.717916  | 2361 | 20 |
| M3-2-77  | 0.153 | 0.002 | 8.738 | 0.118 | 0.414 | 0.004 | 0.066 | 7E-04 | 1.44  | 2382 | 11 | 2311 | 12 | 2231 | 18 | 1298 | 14 | 3.585836  | 6.339211  | 2382 | 11 |
| M3-2-138 | 0.16  | 0.003 | 8.768 | 0.156 | 0.398 | 0.004 | 0.087 | 0.001 | 1.38  | 2455 | 16 | 2314 | 16 | 2159 | 20 | 1684 | 22 | 7.17925   | 12.05703  | 2455 | 16 |

Table DR11 Raw data of zircon U-Pb ages of sample 731B-4X-1W

| Grain    | Apparent Ages (Ma)                |       |                                  |       |                                  |       |                                   |       |       | Corr.% discordant                 |       |                                  |      |                                  |      |                                   |      |                    | Best Age<br>(Ma)   | 1σ    |      |
|----------|-----------------------------------|-------|----------------------------------|-------|----------------------------------|-------|-----------------------------------|-------|-------|-----------------------------------|-------|----------------------------------|------|----------------------------------|------|-----------------------------------|------|--------------------|--------------------|-------|------|
|          | $^{207}\text{Pb}/^{206}\text{Pb}$ | 1σ    | $^{207}\text{Pb}/^{235}\text{U}$ | 1σ    | $^{206}\text{Pb}/^{238}\text{U}$ | 1σ    | $^{208}\text{Pb}/^{232}\text{Th}$ | 1σ    | U/Th  | $^{207}\text{Pb}/^{206}\text{Pb}$ | 1σ    | $^{207}\text{Pb}/^{235}\text{U}$ | 1σ   | $^{206}\text{Pb}/^{238}\text{U}$ | 1σ   | $^{208}\text{Pb}/^{232}\text{Th}$ | 1σ   | 206/238<br>207/235 | 207/206<br>206/238 |       |      |
|          |                                   |       |                                  |       |                                  |       |                                   |       |       |                                   |       |                                  |      |                                  |      |                                   |      |                    |                    |       |      |
| M4-3-144 | 0.046                             | 0.002 | 0.021                            | 7E-04 | 0.003                            | 6E-05 | 0.004                             | 0.002 | 115.2 |                                   | 79    | 21.3                             | 0.7  | 21.5                             | 0.4  | 71                                | 44   | -0.930233          | \                  | 21.5  | 0.4  |
| M4-3-41  | 0.046                             | 0.012 | 0.034                            | 0.009 | 0.005                            | 9E-05 | 0.001                             | 2E-05 | 0.02  |                                   | 421   | 34                               | 9    | 34.3                             | 0.6  | 26.8                              | 0.4  | -0.874636          | \                  | 34.3  | 0.6  |
| M4-3-134 | 0.047                             | 0.003 | 0.053                            | 0.003 | 0.008                            | 1E-04 | 0.003                             | 4E-05 | 1.69  | 61                                | 128   | 53                               | 3    | 52.6                             | 0.9  | 52.6                              | 0.8  | 0.760456           | 13.77049           | 52.6  | 0.9  |
| M4-2-12  | 0.048                             | 0.004 | 0.072                            | 0.005 | 0.011                            | 2E-04 | 0.003                             | 9E-05 | 2.27  | 97                                | 171   | 71                               | 5    | 70                               | 1    | 70                                | 2    | 1.428571           | 27.83505           | 70    | 1    |
| M4-2-50  | 0.053                             | 0.003 | 0.109                            | 0.006 | 0.015                            | 3E-04 | 0.006                             | 3E-04 | 7.69  | 308                               | 100   | 105                              | 6    | 96                               | 2    | 113                               | 5    | 9.375              | 68.83117           | 96    | 2    |
| M4-3-105 | 0.054                             | 0.001 | 0.115                            | 0.003 | 0.015                            | 2E-04 | 0.004                             | 6E-05 | 0.1   | 390.8                             | 55.44 | 110.7                            | 2.8  | 98.1                             | 1.44 | 86.7                              | 1.26 | 12.84404           | 74.89765           | 98.1  | 1.44 |
| M4-3-81  | 0.055                             | 0.001 | 0.121                            | 0.003 | 0.016                            | 2E-04 | 0.004                             | 6E-05 | 0.16  | 427                               | 32    | 116                              | 3    | 101                              | 1    | 87                                | 1    | 14.85149           | 76.3466            | 101   | 1    |
| M4-3-118 | 0.055                             | 0.001 | 0.121                            | 0.003 | 0.016                            | 2E-04 | 0.004                             | 7E-05 | 0.113 | 396.4                             | 50.12 | 116.2                            | 2.72 | 103                              | 1.52 | 89.4                              | 1.39 | 12.81553           | 74.01615           | 103   | 1.52 |
| M4-2-43  | 0.052                             | 0.008 | 0.117                            | 0.017 | 0.016                            | 5E-04 | 0.009                             | 6E-04 | 3.87  | 289                               | 265   | 113                              | 16   | 105                              | 3    | 183                               | 13   | 7.619048           | 63.66782           | 105   | 3    |
| M4-3-57  | 0.056                             | 0.005 | 0.126                            | 0.011 | 0.016                            | 4E-04 | 0.006                             | 2E-04 | 1.4   | 440                               | 149   | 121                              | 10   | 105                              | 2    | 112                               | 4    | 15.2381            | 76.13636           | 105   | 2    |
| M4-3-131 | 0.054                             | 0.001 | 0.127                            | 0.003 | 0.017                            | 3E-04 | 0.005                             | 7E-05 | 0.1   | 359                               | 30    | 121                              | 3    | 109                              | 2    | 92                                | 1    | 11.00917           | 69.63788           | 109   | 2    |
| M4-2-18  | 0.047                             | 0.003 | 0.135                            | 0.007 | 0.021                            | 3E-04 | 0.007                             | 0.001 | 22.72 | 44                                | 117   | 128                              | 6    | 133                              | 2    | 134                               | 29   | -3.759398          | -202.2727          | 133   | 2    |
| M4-3-113 | 0.052                             | 9E-04 | 0.159                            | 0.003 | 0.022                            | 3E-04 | 0.006                             | 9E-05 | 0.11  | 306.4                             | 40.37 | 150.3                            | 2.86 | 140.5                            | 1.99 | 126.8                             | 1.77 | 6.975089           | 54.14491           | 140.5 | 1.99 |
| M4-2-46  | 0.054                             | 0.003 | 0.167                            | 0.009 | 0.023                            | 4E-04 | 0.006                             | 1E-04 | 0.81  | 358                               | 90    | 157                              | 8    | 144                              | 2    | 129                               | 3    | 9.027778           | 59.77654           | 144   | 2    |
| M4-3-31  | 0.056                             | 9E-04 | 0.204                            | 0.003 | 0.026                            | 3E-04 | 0.007                             | 7E-05 | 0.11  | 447                               | 16    | 188                              | 3    | 168                              | 2    | 137                               | 1    | 11.90476           | 62.41611           | 168   | 2    |
| M4-3-27  | 0.052                             | 0.001 | 0.195                            | 0.004 | 0.027                            | 3E-04 | 0.014                             | 2E-04 | 6.29  | 288                               | 27    | 181                              | 3    | 173                              | 2    | 288                               | 4    | 4.624277           | 39.93056           | 173   | 2    |
| M4-3-34  | 0.052                             | 0.002 | 0.22                             | 0.007 | 0.031                            | 4E-04 | 0.01                              | 9E-05 | 4.37  | 286                               | 79    | 202                              | 6    | 195                              | 2    | 194                               | 2    | 3.589744           | 31.81818           | 195   | 2    |
| M4-3-35  | 0.055                             | 0.001 | 0.242                            | 0.005 | 0.032                            | 4E-04 | 0.008                             | 1E-04 | 1.13  | 426                               | 29    | 220                              | 4    | 201                              | 2    | 169                               | 2    | 9.452736           | 52.8169            | 201   | 2    |
| M4-2-51  | 0.059                             | 0.002 | 0.27                             | 0.01  | 0.033                            | 5E-04 | 0.025                             | 6E-04 | 7.32  | 550                               | 60    | 243                              | 8    | 212                              | 3    | 501                               | 12   | 14.62264           | 61.45455           | 212   | 3    |
| M4-3-23  | 0.057                             | 0.001 | 0.273                            | 0.005 | 0.035                            | 4E-04 | 0.011                             | 1E-04 | 11.32 | 482                               | 48    | 245                              | 4    | 221                              | 2    | 218                               | 2    | 10.85973           | 54.14938           | 221   | 2    |
| M4-3-37  | 0.058                             | 0.002 | 0.362                            | 0.009 | 0.045                            | 5E-04 | 0.014                             | 1E-04 | 11.11 | 540                               | 62    | 314                              | 7    | 284                              | 3    | 280                               | 3    | 10.56338           | 47.40741           | 284   | 3    |
| M4-3-54  | 0.058                             | 0.002 | 0.377                            | 0.01  | 0.047                            | 6E-04 | 0.015                             | 2E-04 | 25.99 | 536                               | 64    | 325                              | 7    | 296                              | 4    | 292                               | 4    | 9.797297           | 44.77612           | 296   | 4    |
| M4-3-66  | 0.057                             | 0.002 | 0.406                            | 0.012 | 0.051                            | 7E-04 | 0.032                             | 7E-04 | 6.82  | 499                               | 41    | 346                              | 9    | 323                              | 4    | 641                               | 13   | 7.120743           | 35.27054           | 323   | 4    |
| M4-2-32  | 0.056                             | 0.002 | 0.397                            | 0.013 | 0.052                            | 6E-04 | 0.016                             | 2E-04 | 2.02  | 448                               | 80    | 339                              | 10   | 324                              | 4    | 322                               | 3    | 4.62963            | 27.67857           | 324   | 4    |
| M4-3-40  | 0.06                              | 0.002 | 0.451                            | 0.014 | 0.055                            | 6E-04 | 0.017                             | 3E-04 | 9.53  | 586                               | 72    | 378                              | 10   | 345                              | 4    | 341                               | 5    | 9.565217           | 41.12628           | 345   | 4    |
| M4-3-98  | 0.062                             | 0.002 | 0.476                            | 0.012 | 0.056                            | 8E-04 | 0.017                             | 3E-04 | 8.98  | 682                               | 64    | 396                              | 8    | 348                              | 5    | 342                               | 5    | 13.7931            | 48.97361           | 348   | 5    |
| M4-3-64  | 0.063                             | 0.001 | 0.507                            | 0.01  | 0.058                            | 7E-04 | 0.011                             | 2E-04 | 5.55  | 704                               | 23    | 416                              | 7    | 366                              | 4    | 225                               | 4    | 13.6612            | 48.01136           | 366   | 4    |
| M4-2-26  | 0.058                             | 0.003 | 0.475                            | 0.025 | 0.06                             | 1E-03 | 0.018                             | 3E-04 | 55.9  | 523                               | 123   | 394                              | 17   | 373                              | 6    | 370                               | 7    | 5.630027           | 28.68069           | 373   | 6    |
| M4-3-08  | 0.062                             | 0.003 | 0.515                            | 0.021 | 0.06                             | 9E-04 | 0.019                             | 3E-04 | 4.98  | 671                               | 93    | 422                              | 14   | 378                              | 5    | 372                               | 6    | 11.64021           | 43.66617           | 378   | 5    |
| M4-2-44  | 0.063                             | 0.001 | 0.536                            | 0.012 | 0.062                            | 7E-04 | 0.015                             | 2E-04 | 2.03  | 697                               | 30    | 436                              | 8    | 388                              | 4    | 302                               | 5    | 12.37113           | 44.33286           | 388   | 4    |
| M4-3-99  | 0.062                             | 0.002 | 0.54                             | 0.019 | 0.063                            | 1E-03 | 0.013                             | 3E-04 | 1.1   | 688                               | 47    | 438                              | 12   | 392                              | 6    | 253                               | 5    | 11.73469           | 43.02326           | 392   | 6    |
| M4-3-80  | 0.065                             | 0.002 | 0.562                            | 0.018 | 0.063                            | 9E-04 | 0.019                             | 5E-04 | 21.31 | 760                               | 73    | 453                              | 11   | 395                              | 5    | 387                               | 9    | 14.68354           | 48.02632           | 395   | 5    |
| M4-3-110 | 0.056                             | 0.003 | 0.491                            | 0.022 | 0.064                            | 0.001 | 0.02                              | 3E-04 | 2.5   | 451                               | 108   | 406                              | 15   | 398                              | 6    | 396                               | 5    | 2.01005            | 11.75166           | 398   | 6    |
| M4-2-73  | 0.059                             | 0.002 | 0.519                            | 0.02  | 0.064                            | 1E-03 | 0.02                              | 3E-04 | 5.98  | 562                               | 92    | 425                              | 13   | 400                              | 6    | 396                               | 5    | 6.25               | 28.82562           | 400   | 6    |
| M4-3-128 | 0.064                             | 0.004 | 0.592                            | 0.035 | 0.067                            | 0.001 | 0.018                             | 6E-04 | 1.55  | 742                               | 90    | 472                              | 22   | 418                              | 8    | 351                               | 12   | 12.91866           | 43.66577           | 418   | 8    |
| M4-3-91  | 0.059                             | 0.002 | 0.551                            | 0.021 | 0.067                            | 0.001 | 0.021                             | 3E-04 | 6.96  | 585                               | 91    | 445                              | 14   | 419                              | 6    | 415                               | 6    | 6.205251           | 28.37607           | 419   | 6    |
| M4-2-77  | 0.058                             | 0.002 | 0.535                            | 0.022 | 0.067                            | 0.001 | 0.021                             | 3E-04 | 15.12 | 519                               | 97    | 435                              | 14   | 420                              | 6    | 418                               | 6    | 3.571429           | 19.07514           | 420   | 6    |
| M4-2-80  | 0.06                              | 0.002 | 0.56                             | 0.023 | 0.067                            | 0.001 | 0.031                             | 9E-04 | 5.62  | 614                               | 60    | 452                              | 15   | 420                              | 7    | 609                               | 18   | 7.619048           | 31.59609           | 420   | 7    |
| M4-3-90  | 0.062                             | 0.003 | 0.578                            | 0.027 | 0.067                            | 0.001 | 0.021                             | 4E-04 | 10.23 | 682                               | 109   | 463                              | 17   | 420                              | 6    | 415                               | 8    | 10.2381            | 38.41642           | 420   | 6    |
| M4-2-05  | 0.059                             | 0.001 | 0.554                            | 0.013 | 0.068                            | 9E-04 | 0.035                             | 7E-04 | 10.41 | 566                               | 27    | 448                              | 8    | 425                              | 6    | 703                               | 13   | 5.411765           | 24.91166           | 425   | 6    |
| M4-2-63  | 0.065                             | 0.002 | 0.618                            | 0.017 | 0.069                            | 9E-04 | 0.021                             | 4E-04 | 3.42  | 773                               | 35    | 489                              | 11   | 430                              | 6    | 413                               | 8    | 13.72093           | 44.37257           | 430   | 6    |
| M4-2-72  | 0.062                             | 0.004 | 0.589                            | 0.036 | 0.069                            | 0.001 | 0.014                             | 5E-04 | 1.39  | 670                               | 98    | 471                              | 23   | 430                              | 8    | 287                               | 10   | 9.534884           | 35.8209            | 430   | 8    |
| M4-2-27  | 0.064                             | 0.001 | 0.615                            | 0.013 | 0.069                            | 8E-04 | 0.01                              | 2E-04 | 3.33  | 748                               | 26    | 487                              | 8    | 433                              | 5    | 208                               | 4    | 12.47113           | 42.1123            | 433   | 5    |
| M4-3-146 | 0.057                             | 0.002 | 0.549                            | 0.017 | 0.07                             | 0.001 | 0.014                             | 3E-04 | 2.16  | 495                               | 40    | 444                              | 11   | 434                              | 7    | 274                               | 6    | 2.304147           | 12.32323           | 434   | 7    |
| M4-3-130 | 0.066                             | 0.002 | 0.638                            | 0.021 | 0.07                             | 0.001 | 0.029                             | 6E-04 | 2.33  | 815                               | 41    | 501                              | 13   | 435                              | 7    | 584                               | 12   | 15.17241           | 46.62577           | 435   | 7    |
| M4-3-145 | 0.061                             | 0.001 | 0.594                            | 0.014 | 0.071                            | 0.001 | 0.03                              | 6E-04 | 5.97  | 629                               | 27    | 474                              | 9    | 442                              | 7    | 600                               | 11   | 7.239819           | 29.72973           | 442   | 7    |
| M4-3-93  | 0.061                             | 0.005 | 0.606                            | 0.049 | 0.072                            | 0.001 | 0.022                             | 5E-04 | 3.05  | 642                               | 184   | 481                              | 31   | 448                              | 8    | 443                               | 9    | 7.366071           | 30.21807           | 448   | 8    |
| M4-2-85  | 0.059                             | 0.002 | 0.59                             | 0.018 | 0.072                            | 0.001 | 0.021                             | 4E-04 | 1.35  | 573                               | 41    | 471                              | 12   | 450                              | 7    | 411                               | 8    | 4.666667           | 21.46597           | 450   | 7    |
| M4-3-133 | 0.066                             | 0.002 | 0.669                            | 0.024 | 0.073                            | 0.001 | 0.032                             | 7E-04 | 2.69  | 814                               | 46    | 520                              | 14   | 455                              | 7    | 644                               | 14   | 14.28571           | 44.10319           | 455   | 7    |
| M4-2-83  | 0.059                             | 0.005 | 0.598                            | 0.054 | 0.074                            | 0.002 | 0.006                             | 7E-04 | 3.73  | 559                               | 153   | 476                              | 34   | 459                              | 11   | 124                               | 15   | 3.703704           | 17.88909           | 459   | 11   |
| M4-2-81  | 0.059                             | 0.002 | 0.619                            | 0.02  | 0.077                            | 0.001 | 0.022                             | 6E-04 | 7.27  | 551                               | 43    | 489                              | 12   | 476                              | 7    | 431                               | 13   | 2.731092           | 13.61162           | 476   | 7    |
| M4-2-14  | 0.066                             | 0.003 | 0.718                            | 0.026 | 0.079                            | 0.001 | 0.024                             | 4E-04 | 10.89 | 803                               | 82    | 549                              | 15   | 490                              | 6    | 482                               | 7    | 12.04082           | 38.97883           | 490   | 6    |
| M4-3-52  | 0.062                             | 0.002 | 0.672                            | 0.018 | 0.079                            | 0.001 | 0.014                             | 5E-04 | 9.69  | 663                               | 37    | 522                              | 11   | 491                              | 6    | 276                               | 11   | 6.313646           | 25.94268           | 491   | 6    |
| M4-3-137 | 0.067                             | 0.002 | 0.733                            | 0.018 | 0.08                             | 0.001 | 0.017                             | 3E-04 | 2.19  | 833                               | 27    | 559                              | 11   | 494                              | 7    | 334                               | 6    | 13.15789           | 40.69628           | 494   | 7    |
| M4-2-42  | 0.06                              | 0.002 | 0.666                            | 0.02  | 0.08                             | 1E-03 | 0.025                             | 3E-04 | 14.13 | 606                               | 70    | 518                              | 12   | 499                              | 6    | 496                               | 6    | 3.807615           | 17.65677           | 499   | 6    |
| M4-3-111 | 0.058                             | 0.003 | 0.647                            | 0.028 | 0.081                            | 0.001 | 0.025                             | 3E-04 | 3.58  | 536                               | 103   | 507                              | 17   | 500                              | 8    | 499                               | 7    | 1.4                | 6.716418           | 500   | 8    |
| M4-2-01  | 0.062                             | 0.002 | 0.695                            | 0.018 | 0.082                            | 0.001 | 0.008                             | 2E-04 | 4.34  | 669                               | 32    | 536                              | 11   | 505                              | 7    | 154                               | 5    | 6.138614           | 24.5142            | 505   | 7    |
| M4-2-91  | 0.055                             | 0.002 | 0.616                            | 0.027 | 0.082                            | 0.001 | 0.01                              |       |       |                                   |       |                                  |      |                                  |      |                                   |      |                    |                    |       |      |

|          |       |       |       |       |       |       |       |       |       |      |     |      |    |      |    |      |    |          |          |      |    |
|----------|-------|-------|-------|-------|-------|-------|-------|-------|-------|------|-----|------|----|------|----|------|----|----------|----------|------|----|
| M4-2-71  | 0.069 | 0.002 | 1.263 | 0.045 | 0.133 | 0.002 | 0.035 | 0.001 | 6.29  | 893  | 49  | 829  | 20 | 805  | 12 | 686  | 24 | 2.981366 | 9.854423 | 805  | 12 |
| M4-3-55  | 0.078 | 0.002 | 1.468 | 0.031 | 0.136 | 0.002 | 0.03  | 5E-04 | 1.68  | 1155 | 23  | 917  | 13 | 822  | 9  | 592  | 9  | 11.55718 | 28.83117 | 822  | 9  |
| M4-2-06  | 0.076 | 0.002 | 1.425 | 0.033 | 0.137 | 0.002 | 0.038 | 5E-04 | 0.73  | 1085 | 25  | 899  | 14 | 825  | 11 | 759  | 10 | 8.969697 | 23.96313 | 825  | 11 |
| M4-3-114 | 0.077 | 0.002 | 1.47  | 0.038 | 0.138 | 0.002 | 0.012 | 3E-04 | 2.33  | 1128 | 28  | 918  | 16 | 833  | 12 | 237  | 6  | 10.20408 | 26.15248 | 833  | 12 |
| M4-3-01  | 0.069 | 0.001 | 1.32  | 0.024 | 0.138 | 0.002 | 0.023 | 5E-04 | 6.02  | 909  | 19  | 855  | 11 | 834  | 10 | 459  | 10 | 2.517986 | 8.250825 | 834  | 10 |
| M4-3-42  | 0.079 | 0.002 | 1.525 | 0.034 | 0.141 | 0.002 | 0.036 | 5E-04 | 1.62  | 1163 | 26  | 941  | 14 | 849  | 9  | 718  | 10 | 10.83628 | 26.99914 | 849  | 9  |
| M4-2-19  | 0.077 | 0.001 | 1.5   | 0.026 | 0.141 | 0.002 | 0.039 | 7E-04 | 11.05 | 1122 | 18  | 930  | 11 | 851  | 9  | 766  | 13 | 9.283196 | 24.1533  | 851  | 9  |
| M4-2-68  | 0.079 | 0.002 | 1.554 | 0.049 | 0.143 | 0.002 | 0.01  | 3E-04 | 1.32  | 1168 | 39  | 952  | 19 | 862  | 12 | 194  | 6  | 10.44084 | 26.19863 | 862  | 12 |
| M4-2-29  | 0.078 | 0.002 | 1.598 | 0.045 | 0.148 | 0.002 | 0.039 | 8E-04 | 2.45  | 1154 | 36  | 969  | 18 | 890  | 10 | 777  | 16 | 8.876404 | 22.87695 | 890  | 10 |
| M4-2-38  | 0.072 | 0.004 | 1.48  | 0.074 | 0.149 | 0.002 | 0.045 | 7E-04 | 11.04 | 985  | 111 | 922  | 30 | 896  | 14 | 892  | 13 | 2.901786 | 9.035533 | 896  | 14 |
| M4-3-03  | 0.073 | 0.002 | 1.517 | 0.027 | 0.15  | 0.002 | 0.045 | 6E-04 | 7.63  | 1027 | 45  | 937  | 11 | 900  | 11 | 894  | 11 | 4.111111 | 12.36611 | 900  | 11 |
| M4-3-76  | 0.084 | 0.002 | 1.778 | 0.036 | 0.154 | 0.002 | 0.032 | 5E-04 | 1.05  | 1289 | 20  | 1037 | 13 | 922  | 11 | 632  | 9  | 12.47289 | 28.47168 | 922  | 11 |
| M4-3-92  | 0.085 | 0.002 | 1.798 | 0.041 | 0.154 | 0.002 | 0.044 | 8E-04 | 2.3   | 1308 | 23  | 1045 | 15 | 923  | 12 | 875  | 15 | 13.21777 | 29.43425 | 923  | 12 |
| M4-2-07  | 0.086 | 0.001 | 1.848 | 0.034 | 0.156 | 0.002 | 0.04  | 5E-04 | 1.29  | 1330 | 17  | 1063 | 12 | 937  | 11 | 801  | 10 | 13.44717 | 29.54887 | 937  | 11 |
| M4-3-82  | 0.089 | 0.002 | 1.981 | 0.039 | 0.161 | 0.002 | 0.018 | 3E-04 | 1.07  | 1411 | 19  | 1109 | 13 | 961  | 12 | 364  | 5  | 15.40062 | 31.89227 | 961  | 12 |
| M4-3-101 | 0.078 | 0.002 | 1.747 | 0.039 | 0.163 | 0.002 | 0.049 | 8E-04 | 1.77  | 1145 | 23  | 1026 | 14 | 971  | 13 | 962  | 15 | 5.664264 | 15.19651 | 971  | 13 |
| M4-3-135 | 0.082 | 0.002 | 1.841 | 0.043 | 0.163 | 0.002 | 0.04  | 6E-04 | 0.82  | 1241 | 23  | 1060 | 15 | 975  | 14 | 797  | 12 | 8.717949 | 21.43433 | 975  | 14 |
| M4-3-129 | 0.092 | 0.002 | 2.063 | 0.05  | 0.163 | 0.003 | 0.034 | 6E-04 | 0.97  | 1457 | 24  | 1136 | 17 | 976  | 14 | 670  | 12 | 16.39344 | 33.01304 | 976  | 14 |
| M4-2-76  | 0.084 | 0.004 | 1.93  | 0.081 | 0.166 | 0.003 | 0.049 | 7E-04 | 3.41  | 1303 | 90  | 1091 | 28 | 989  | 15 | 972  | 14 | 10.31345 | 24.09823 | 989  | 15 |
| M4-2-75  | 0.078 | 0.002 | 1.908 | 0.048 | 0.177 | 0.003 | 0.032 | 0.002 | 47.01 | 1152 | 28  | 1084 | 17 | 1050 | 14 | 639  | 37 | 3.238095 | 8.854167 | 1152 | 28 |
| M4-3-60  | 0.082 | 0.003 | 1.972 | 0.059 | 0.175 | 0.002 | 0.052 | 6E-04 | 2.25  | 1240 | 65  | 1106 | 20 | 1039 | 12 | 1028 | 12 | 6.448508 | 16.20968 | 1240 | 65 |
| M4-3-149 | 0.082 | 0.004 | 2.15  | 0.095 | 0.19  | 0.003 | 0.057 | 9E-04 | 1.58  | 1244 | 96  | 1165 | 31 | 1123 | 18 | 1116 | 16 | 3.739982 | 9.726688 | 1244 | 96 |
| M4-3-121 | 0.086 | 0.002 | 2.031 | 0.046 | 0.171 | 0.003 | 0.033 | 7E-04 | 5.39  | 1336 | 22  | 1126 | 15 | 1020 | 14 | 660  | 14 | 10.39216 | 23.65269 | 1336 | 22 |
| M4-3-56  | 0.09  | 0.002 | 2.23  | 0.04  | 0.179 | 0.002 | 0.046 | 6E-04 | 1.35  | 1432 | 18  | 1191 | 13 | 1063 | 12 | 910  | 12 | 12.04139 | 25.76816 | 1432 | 18 |
| M4-2-89  | 0.092 | 0.003 | 2.228 | 0.065 | 0.176 | 0.003 | 0.039 | 0.001 | 3.49  | 1459 | 32  | 1190 | 20 | 1047 | 15 | 778  | 19 | 13.65807 | 28.23852 | 1459 | 32 |
| M4-2-70  | 0.094 | 0.002 | 2.955 | 0.078 | 0.228 | 0.003 | 0.032 | 0.001 | 10.4  | 1505 | 29  | 1396 | 20 | 1326 | 17 | 646  | 21 | 5.279035 | 11.89369 | 1505 | 29 |
| M4-2-28  | 0.106 | 0.003 | 3.652 | 0.089 | 0.251 | 0.003 | 0.071 | 0.001 | 1.41  | 1724 | 27  | 1561 | 19 | 1443 | 16 | 1393 | 23 | 8.177408 | 16.2993  | 1724 | 27 |
| M4-3-95  | 0.106 | 0.003 | 4.297 | 0.108 | 0.294 | 0.004 | 0.083 | 0.001 | 0.97  | 1732 | 25  | 1693 | 21 | 1661 | 22 | 1617 | 26 | 1.92655  | 4.099307 | 1732 | 25 |
| M4-2-69  | 0.115 | 0.003 | 4.602 | 0.113 | 0.291 | 0.004 | 0.008 | 4E-04 | 5.28  | 1875 | 25  | 1750 | 20 | 1647 | 20 | 166  | 7  | 6.253795 | 12.16    | 1875 | 25 |
| M4-2-92  | 0.117 | 0.004 | 5.067 | 0.159 | 0.315 | 0.005 | 0.092 | 0.003 | 7.28  | 1907 | 33  | 1831 | 27 | 1764 | 26 | 1776 | 64 | 3.798186 | 7.498689 | 1907 | 33 |
| M4-3-75  | 0.151 | 0.002 | 7.856 | 0.137 | 0.378 | 0.005 | 0.098 | 0.001 | 6.96  | 2355 | 15  | 2215 | 16 | 2067 | 22 | 1889 | 25 | 7.160135 | 12.2293  | 2355 | 15 |
| M4-3-141 | 0.161 | 0.003 | 8.519 | 0.163 | 0.385 | 0.006 | 0.1   | 0.001 | 0.04  | 2461 | 15  | 2288 | 17 | 2099 | 27 | 1933 | 26 | 9.004288 | 14.70947 | 2461 | 15 |
| M4-2-36  | 0.167 | 0.003 | 9.514 | 0.171 | 0.413 | 0.005 | 0.029 | 5E-04 | 1.48  | 2530 | 16  | 2389 | 17 | 2229 | 21 | 584  | 10 | 7.178107 | 11.89723 | 2530 | 16 |
| M4-2-48  | 0.179 | 0.004 | 10.46 | 0.225 | 0.424 | 0.005 | 0.115 | 0.003 | 6.62  | 2645 | 20  | 2477 | 20 | 2278 | 24 | 2201 | 51 | 8.735733 | 13.87524 | 2645 | 20 |



Table DR11 Raw data of zircon U-Pb ages of sample 731C-5W-4W

| Grain  | Apparent Ages (Ma)                      |       |                                        |       |                                        |       |                                         |       |       | Corr.% discordant                       |      |                                        |    | Best Age<br>(Ma)                       | 1σ  |                                         |      |                                 |                                 |      |     |
|--------|-----------------------------------------|-------|----------------------------------------|-------|----------------------------------------|-------|-----------------------------------------|-------|-------|-----------------------------------------|------|----------------------------------------|----|----------------------------------------|-----|-----------------------------------------|------|---------------------------------|---------------------------------|------|-----|
|        | <sup>207</sup> Pb/<br><sup>206</sup> Pb | 1σ    | <sup>207</sup> Pb/<br><sup>235</sup> U | 1σ    | <sup>206</sup> Pb/<br><sup>238</sup> U | 1σ    | <sup>208</sup> Pb/<br><sup>232</sup> Th | 1σ    | U/Th  | <sup>207</sup> Pb/<br><sup>206</sup> Pb | 1σ   | <sup>207</sup> Pb/<br><sup>235</sup> U | 1σ | <sup>206</sup> Pb/<br><sup>238</sup> U | 1σ  | <sup>208</sup> Pb/<br><sup>232</sup> Th | 1σ   | <sup>206</sup> / <sub>207</sub> | <sup>207</sup> / <sub>206</sub> |      |     |
|        |                                         |       |                                        |       |                                        |       |                                         |       |       |                                         |      |                                        |    |                                        |     |                                         |      |                                 |                                 |      |     |
| O1-53  | 0.053                                   | 0.005 | 0.036                                  | 0.003 | 0.005                                  | 1E-04 | 0.007                                   | 9E-04 | 72.56 | 318                                     | 153  | 35                                     | 3  | 31.4                                   | 0.6 | 134                                     | 18   | 11.46497                        | 90.12579                        | 31.4 | 0.6 |
| O1-129 | 0.046                                   | 0.094 | 0.035                                  | 0.07  | 0.005                                  | 7E-04 | 0.013                                   | 0.062 | 48.25 |                                         | 2111 | 34                                     | 69 | 35                                     | 4   | 258                                     | 1244 | -2.857143                       | \                               | 35   | 4   |
| O1-89  | 0.05                                    | 0.026 | 0.041                                  | 0.021 | 0.006                                  | 3E-04 | 0.002                                   | 0.002 | 8.42  | 211                                     | 901  | 41                                     | 20 | 38                                     | 2   | 38                                      | 50   | 7.894737                        | 81.99052                        | 38   | 2   |
| O1-173 | 0.049                                   | 0.002 | 0.044                                  | 0.001 | 0.007                                  | 1E-04 | 0.002                                   | 5E-05 | 2.96  | 124                                     | 51   | 44                                     | 1  | 42.3                                   | 0.6 | 46                                      | 1    | 4.018913                        | 65.8871                         | 42.3 | 0.6 |
| O1-77  | 0.047                                   | 0.002 | 0.044                                  | 0.002 | 0.007                                  | 1E-04 | 0.002                                   | 6E-05 | 3.24  | 27                                      | 97   | 43                                     | 2  | 43.7                                   | 0.6 | 44                                      | 1    | -1.601831                       | -61.85185                       | 43.7 | 0.6 |
| O1-26  | 0.054                                   | 0.004 | 0.063                                  | 0.004 | 0.008                                  | 2E-04 | 0.003                                   | 1E-04 | 2.68  | 381                                     | 125  | 62                                     | 4  | 54                                     | 1   | 54                                      | 2    | 14.81481                        | 85.82677                        | 54   | 1   |
| O1-152 | 0.055                                   | 0.006 | 0.063                                  | 0.006 | 0.008                                  | 2E-04 | 0.003                                   | 4E-05 | 1.34  | 406                                     | 236  | 62                                     | 6  | 54                                     | 1   | 52.7                                    | 0.8  | 14.81481                        | 86.69951                        | 54   | 1   |
| O1-169 | 0.049                                   | 0.001 | 0.065                                  | 0.002 | 0.01                                   | 2E-04 | 0.003                                   | 5E-05 | 0.85  | 148                                     | 40   | 64                                     | 2  | 61.8                                   | 1   | 52                                      | 1    | 3.559871                        | 58.24324                        | 61.8 | 1   |
| O1-28  | 0.052                                   | 0.003 | 0.07                                   | 0.004 | 0.01                                   | 2E-04 | 0.003                                   | 5E-05 | 11.09 | 301                                     | 128  | 69                                     | 3  | 62.2                                   | 0.9 | 61                                      | 1    | 10.93248                        | 79.33555                        | 62.2 | 0.9 |
| O1-157 | 0.049                                   | 0.004 | 0.071                                  | 0.005 | 0.01                                   | 2E-04 | 0.003                                   | 5E-05 | 2.25  | 164                                     | 161  | 69                                     | 5  | 67                                     | 1   | 66                                      | 1    | 2.985075                        | 59.14634                        | 67   | 1   |
| O1-182 | 0.055                                   | 0.003 | 0.08                                   | 0.005 | 0.011                                  | 2E-04 | 0.003                                   | 9E-05 | 1.22  | 395                                     | 100  | 78                                     | 4  | 68                                     | 1   | 67                                      | 2    | 14.70588                        | 82.78481                        | 68   | 1   |
| O1-38  | 0.05                                    | 0.02  | 0.075                                  | 0.03  | 0.011                                  | 5E-04 | 0.003                                   | 4E-04 | 0.91  | 187                                     | 707  | 73                                     | 29 | 70                                     | 3   | 69                                      | 8    | 4.285714                        | 62.56684                        | 70   | 3   |
| O1-82  | 0.051                                   | 0.002 | 0.077                                  | 0.003 | 0.011                                  | 2E-04 | 0.004                                   | 2E-04 | 7.96  | 223                                     | 72   | 75                                     | 3  | 70.7                                   | 1   | 88                                      | 3    | 6.082037                        | 68.29596                        | 70.7 | 1   |
| O1-14  | 0.049                                   | 0.005 | 0.074                                  | 0.008 | 0.011                                  | 3E-04 | 0.004                                   | 2E-04 | 1.52  | 139                                     | 190  | 73                                     | 8  | 71                                     | 2   | 73                                      | 3    | 2.816901                        | 48.92086                        | 71   | 2   |
| O1-20  | 0.048                                   | 0.002 | 0.074                                  | 0.003 | 0.011                                  | 2E-04 | 0.004                                   | 4E-05 |       | 96                                      | 93   | 73                                     | 3  | 72                                     | 0.9 | 71.9                                    | 0.9  | 1.388889                        | 25                              | 72   | 0.9 |
| O1-85  | 0.052                                   | 0.004 | 0.08                                   | 0.006 | 0.011                                  | 2E-04 | 0.004                                   | 1E-04 | 2.2   | 272                                     | 131  | 78                                     | 5  | 72                                     | 1   | 77                                      | 3    | 8.333333                        | 73.52941                        | 72   | 1   |
| O1-59  | 0.051                                   | 0.003 | 0.081                                  | 0.005 | 0.012                                  | 2E-04 | 0.004                                   | 1E-04 | 2.15  | 228                                     | 103  | 79                                     | 4  | 74                                     | 1   | 79                                      | 2    | 6.756757                        | 67.54386                        | 74   | 1   |
| O1-11  | 0.052                                   | 0.003 | 0.085                                  | 0.006 | 0.012                                  | 2E-04 | 0.004                                   | 1E-04 | 2.21  | 269                                     | 116  | 82                                     | 5  | 76                                     | 1   | 80                                      | 3    | 7.894737                        | 71.74721                        | 76   | 1   |
| O1-127 | 0.046                                   | 0.004 | 0.075                                  | 0.006 | 0.012                                  | 2E-04 | 0.004                                   | 1E-04 | 1.61  |                                         | 171  | 74                                     | 5  | 76                                     | 1   | 77                                      | 3    | -2.631579                       | \                               | 76   | 1   |
| O1-101 | 0.054                                   | 0.002 | 0.092                                  | 0.003 | 0.012                                  | 2E-04 | 0.004                                   | 7E-05 | 1.88  | 373                                     | 52   | 90                                     | 3  | 79                                     | 1   | 76                                      | 1    | 13.92405                        | 78.82038                        | 79   | 1   |
| O1-31  | 0.053                                   | 0.003 | 0.102                                  | 0.006 | 0.014                                  | 2E-04 | 0.004                                   | 2E-04 | 3.56  | 336                                     | 102  | 98                                     | 5  | 89                                     | 1   | 85                                      | 3    | 10.11236                        | 73.5119                         | 89   | 1   |
| O1-67  | 0.055                                   | 0.002 | 0.108                                  | 0.005 | 0.014                                  | 2E-04 | 0.004                                   | 8E-05 | 1.15  | 413                                     | 71   | 105                                    | 4  | 92                                     | 1   | 88                                      | 2    | 14.13043                        | 77.72397                        | 92   | 1   |
| O1-137 | 0.052                                   | 0.002 | 0.102                                  | 0.004 | 0.014                                  | 2E-04 | 0.004                                   | 9E-05 | 0.76  | 264                                     | 61   | 99                                     | 4  | 92                                     | 1   | 86                                      | 2    | 7.608696                        | 65.15152                        | 92   | 1   |
| O1-71  | 0.047                                   | 0.009 | 0.094                                  | 0.018 | 0.014                                  | 5E-04 | 0.005                                   | 3E-04 | 1.34  | 42                                      | 343  | 91                                     | 17 | 93                                     | 3   | 93                                      | 7    | -2.150538                       | -121.4286                       | 93   | 3   |
| O1-199 | 0.053                                   | 0.004 | 0.106                                  | 0.007 | 0.014                                  | 3E-04 | 0.005                                   | 2E-04 |       | 344                                     | 118  | 103                                    | 7  | 93                                     | 2   | 93                                      | 4    | 10.75269                        | 72.96512                        | 93   | 2   |
| O1-109 | 0.053                                   | 0.006 | 0.11                                   | 0.012 | 0.015                                  | 4E-04 | 0.005                                   | 2E-04 | 1.88  | 323                                     | 198  | 106                                    | 11 | 96                                     | 2   | 109                                     | 5    | 10.41667                        | 70.27864                        | 96   | 2   |
| O1-111 | 0.05                                    | 0.001 | 0.114                                  | 0.003 | 0.017                                  | 2E-04 | 0.005                                   | 1E-04 |       | 201                                     | 42   | 110                                    | 3  | 106                                    | 1   | 104                                     | 2    | 3.773585                        | 47.26368                        | 106  | 1   |
| O1-93  | 0.05                                    | 0.003 | 0.116                                  | 0.007 | 0.017                                  | 3E-04 | 0.006                                   | 2E-04 | 1.84  | 189                                     | 110  | 111                                    | 7  | 108                                    | 2   | 111                                     | 3    | 2.777778                        | 42.85714                        | 108  | 2   |
| O1-19  | 0.05                                    | 0.001 | 0.119                                  | 0.003 | 0.017                                  | 2E-04 | 0.005                                   | 8E-05 | 1.55  | 198                                     | 43   | 115                                    | 3  | 111                                    | 1   | 102                                     | 2    | 3.603604                        | 43.93939                        | 111  | 1   |
| O1-161 | 0.054                                   | 0.004 | 0.131                                  | 0.008 | 0.018                                  | 4E-04 | 0.005                                   | 2E-04 | 1.75  | 388                                     | 109  | 125                                    | 8  | 112                                    | 2   | 102                                     | 3    | 11.60714                        | 71.13402                        | 112  | 2   |
| O1-168 | 0.055                                   | 0.002 | 0.17                                   | 0.006 | 0.023                                  | 4E-04 | 0.017                                   | 5E-04 | 17.93 | 393                                     | 52   | 160                                    | 5  | 144                                    | 2   | 331                                     | 11   | 11.11111                        | 63.35878                        | 144  | 2   |
| O1-86  | 0.05                                    | 0.002 | 0.162                                  | 0.007 | 0.023                                  | 3E-04 | 0.007                                   | 8E-05 | 6.4   | 213                                     | 100  | 152                                    | 6  | 149                                    | 2   | 148                                     | 2    | 2.013423                        | 30.04695                        | 149  | 2   |
| O1-144 | 0.052                                   | 0.001 | 0.194                                  | 0.005 | 0.027                                  | 4E-04 | 0.008                                   | 2E-04 | 4.96  | 283                                     | 30   | 180                                    | 4  | 172                                    | 2   | 166                                     | 3    | 4.651163                        | 39.22261                        | 172  | 2   |
| O1-78  | 0.055                                   | 0.002 | 0.21                                   | 0.008 | 0.028                                  | 4E-04 | 0.004                                   | 1E-04 | 1.94  | 393                                     | 56   | 194                                    | 6  | 178                                    | 2   | 89                                      | 2    | 8.988764                        | 54.70738                        | 178  | 2   |
| O1-122 | 0.051                                   | 0.002 | 0.199                                  | 0.007 | 0.029                                  | 4E-04 | 0.008                                   | 3E-04 | 9.7   | 222                                     | 55   | 185                                    | 6  | 182                                    | 3   | 162                                     | 6    | 1.648352                        | 18.01802                        | 182  | 3   |
| O1-98  | 0.05                                    | 0.001 | 0.211                                  | 0.005 | 0.03                                   | 4E-04 | 0.009                                   | 1E-04 | 2.34  | 205                                     | 28   | 194                                    | 4  | 193                                    | 2   | 189                                     | 3    | 0.518135                        | 5.853659                        | 193  | 2   |
| O1-166 | 0.051                                   | 0.001 | 0.222                                  | 0.007 | 0.031                                  | 5E-04 | 0.012                                   | 3E-04 | 12.09 | 262                                     | 41   | 204                                    | 6  | 199                                    | 3   | 234                                     | 7    | 2.512563                        | 24.0458                         | 199  | 3   |
| O1-196 | 0.058                                   | 0.002 | 0.254                                  | 0.007 | 0.032                                  | 5E-04 | 0.02                                    | 5E-04 | 8.9   | 528                                     | 37   | 230                                    | 6  | 202                                    | 3   | 409                                     | 9    | 13.86139                        | 61.74242                        | 202  | 3   |
| O1-178 | 0.054                                   | 0.002 | 0.248                                  | 0.01  | 0.033                                  | 5E-04 | 0.017                                   | 5E-04 | 6.55  | 383                                     | 62   | 225                                    | 8  | 210                                    | 3   | 341                                     | 10   | 7.142857                        | 45.16971                        | 210  | 3   |
| O1-12  | 0.051                                   | 0.003 | 0.244                                  | 0.012 | 0.035                                  | 5E-04 | 0.011                                   | 1E-04 | 2.47  | 245                                     | 117  | 221                                    | 9  | 219                                    | 3   | 219                                     | 3    | 0.913242                        | 10.61224                        | 219  | 3   |
| O1-197 | 0.058                                   | 0.003 | 0.284                                  | 0.012 | 0.035                                  | 6E-04 | 0.011                                   | 2E-04 | 27.71 | 537                                     | 105  | 254                                    | 10 | 224                                    | 4   | 221                                     | 4    | 13.39286                        | 58.28678                        | 224  | 4   |
| O1-165 | 0.056                                   | 0.003 | 0.28                                   | 0.013 | 0.036                                  | 6E-04 | 0.011                                   | 2E-04 | 5.86  | 468                                     | 111  | 251                                    | 10 | 228                                    | 4   | 225                                     | 4    | 10.08772                        | 51.28205                        | 228  | 4   |
| O1-115 | 0.054                                   | 0.003 | 0.325                                  | 0.018 | 0.043                                  | 8E-04 | 0.017                                   | 7E-04 | 5.81  | 386                                     | 89   | 286                                    | 13 | 274                                    | 5   | 336                                     | 14   | 4.379562                        | 29.01554                        | 274  | 5   |
| O1-185 | 0.058                                   | 0.002 | 0.387                                  | 0.011 | 0.048                                  | 7E-04 | 0.028                                   | 6E-04 | 7.68  | 530                                     | 37   | 332                                    | 8  | 304                                    | 4   | 558                                     | 12   | 9.210526                        | 42.64151                        | 304  | 4   |
| O1-58  | 0.053                                   | 0.002 | 0.379                                  | 0.01  | 0.052                                  | 6E-04 | 0.016                                   | 2E-04 | 11.53 | 344                                     | 66   | 326                                    | 7  | 324                                    | 3   | 323                                     | 4    | 0.617284                        | 5.813953                        | 324  | 3   |
| O1-61  | 0.054                                   | 0.002 | 0.398                                  | 0.012 | 0.053                                  | 7E-04 | 0.015                                   | 2E-04 | 0.78  | 381                                     | 47   | 340                                    | 9  | 334                                    | 4   | 293                                     | 4    | 1.796407                        | 12.33596                        | 334  | 4   |
| O1-03  | 0.053                                   | 0.005 | 0.398                                  | 0.035 | 0.054                                  | 0.001 | 0.005                                   | 2E-04 | 0.35  | 333                                     | 154  | 341                                    | 25 | 342                                    | 8   | 91                                      | 3    | -0.292398                       | -2.702703                       | 342  | 8   |
| O1-66  | 0.062                                   | 0.003 | 0.467                                  | 0.02  | 0.055                                  | 8E-04 | 0.013                                   | 3E-04 | 0.94  | 667                                     | 68   | 389                                    | 14 | 344                                    | 5   | 254                                     | 5    | 13.0814                         | 48.42579                        | 344  | 5   |
| O1-25  | 0.059                                   | 0.001 | 0.454                                  | 0.009 | 0.056                                  | 6E-04 | 0.014                                   | 2E-04 | 1.57  | 560                                     | 26   | 380                                    | 7  | 351                                    | 4   | 281                                     | 4    | 8.262108                        | 37.32143                        | 351  | 4   |
| O1-198 | 0.057                                   | 0.002 | 0.442                                  | 0.014 | 0.056                                  | 9E-04 | 0.018                                   | 3E-04 | 7.69  | 489                                     | 77   | 372                                    | 10 | 353                                    | 5   | 351                                     | 5    | 5.382436                        | 27.81186                        | 353  | 5   |
| O1-155 | 0.058                                   | 0.003 | 0.464                                  | 0.028 | 0.058                                  | 0.001 | 0.023                                   | 7E-04 | 2.42  | 531                                     | 97   | 387                                    | 19 | 364                                    | 7   | 452                                     | 15   | 6.318681                        | 31.45009                        | 364  | 7   |
| O1-84  | 0.061                                   | 0.002 | 0.503                                  | 0.013 | 0.059                                  | 7E-04 | 0.009                                   | 1E-04 | 0.93  | 653                                     | 34   | 414                                    | 9  | 372                                    | 4   | 173                                     | 3    | 11.29032                        | 43.03216                        | 372  | 4   |
| O1-189 | 0.059                                   | 0.002 | 0.489                                  | 0.016 | 0.06                                   | 1E-03 | 0.017                                   | 3E-04 | 0.52  | 580                                     | 44   | 404                                    | 11 | 374                                    | 6   | 344                                     | 6    | 8.02139                         | 35.51724                        | 374  | 6   |
| O1-147 | 0.057                                   | 0.002 | 0.507                                  | 0.012 | 0.064                                  | 9E-04 | 0.02                                    | 3E-04 | 26.39 | 509                                     | 61   | 417                                    | 8  | 400                                    | 5   | 398                                     | 5    | 4.25                            | 21.41454                        | 400  | 5   |
| O1-21  | 0.065                                   | 0.001 | 0.582                                  | 0.01  | 0.065                                  | 8E-04 | 0.006                                   | 1E-04 | 2.47  | 778                                     | 20   | 466                                    | 7  | 405                                    | 5   | 124                                     | 2    | 15.06173                        | 47.94344                        | 405  | 5   |
| O1-110 | 0.055                                   | 0.002 | 0.49                                   | 0.022 | 0.065                                  | 0.001 | 0.026                                   | 6E-04 | 2.14  | 399                                     | 73   | 405                                    | 15 | 406                                    | 6   | 519                                     | 13   | -0.246305                       | -1.754386                       | 406  | 6   |
| O1-183 | 0.057                                   | 0.002 | 0.524                                  | 0.014 | 0.066                                  | 1E-03 | 0.021                                   | 3E-04 | 7.31  | 511                                     | 69   | 428                                    | 9  | 412                                    | 6   | 410                                     | 5    | 3.883495                        | 19.37378                        | 412  | 6   |
| O1-22  | 0.059                                   | 0.001 | 0.588                                  | 0.013 | 0.073                                  | 9E-04 | 0.021                                   | 3E-04 | 1.88  | 557                                     | 29   | 470                                    | 9  | 452                                    | 5   | 429                                     | 6    | 3.982301                        | 18.85099                        | 452  | 5   |
| O1-131 | 0.056                                   | 0.002 | 0.574                                  | 0.016 | 0.075                                  | 0.001 | 0.023                                   | 3E-04 | 6.89  | 446                                     | 70   | 461                                    | 10 | 464                                    | 6   | 464                                     | 6    | -0.646552                       | -4.035874                       |      |     |

|        |       |       |       |       |       |       |       |       |       |      |     |      |    |      |    |      |    |           |           |      |     |
|--------|-------|-------|-------|-------|-------|-------|-------|-------|-------|------|-----|------|----|------|----|------|----|-----------|-----------|------|-----|
| O1-36  | 0.072 | 0.002 | 1.308 | 0.043 | 0.133 | 0.002 | 0.039 | 6E-04 | 0.75  | 975  | 45  | 849  | 19 | 802  | 10 | 778  | 12 | 5.860349  | 17.74359  | 802  | 10  |
| O1-99  | 0.074 | 0.002 | 1.346 | 0.038 | 0.133 | 0.002 | 0.04  | 5E-04 | 5.26  | 1031 | 64  | 866  | 16 | 803  | 10 | 793  | 9  | 7.845579  | 22.11445  | 803  | 10  |
| O1-150 | 0.075 | 0.002 | 1.363 | 0.037 | 0.133 | 0.002 | 0.042 | 9E-04 | 2.99  | 1056 | 32  | 873  | 16 | 803  | 11 | 829  | 17 | 8.71731   | 23.95833  | 803  | 11  |
| O1-72  | 0.072 | 0.003 | 1.326 | 0.049 | 0.133 | 0.002 | 0.039 | 7E-04 | 1.11  | 995  | 51  | 857  | 21 | 805  | 11 | 777  | 14 | 6.459627  | 19.09548  | 805  | 11  |
| O1-35  | 0.071 | 0.002 | 1.343 | 0.03  | 0.136 | 0.002 | 0.032 | 5E-04 | 1.93  | 971  | 27  | 864  | 13 | 823  | 9  | 638  | 10 | 4.981774  | 15.24202  | 823  | 9   |
| O1-126 | 0.082 | 0.002 | 1.552 | 0.037 | 0.137 | 0.002 | 0.039 | 7E-04 | 3.38  | 1256 | 26  | 951  | 15 | 825  | 11 | 774  | 14 | 15.27273  | 34.31529  | 825  | 11  |
| O1-48  | 0.068 | 0.002 | 1.287 | 0.039 | 0.137 | 0.002 | 0.053 | 0.001 | 6.54  | 866  | 42  | 840  | 17 | 830  | 10 | 1035 | 28 | 1.204819  | 4.157044  | 830  | 10  |
| O1-142 | 0.073 | 0.002 | 1.392 | 0.034 | 0.138 | 0.002 | 0.038 | 7E-04 | 2.83  | 1024 | 27  | 886  | 14 | 831  | 11 | 763  | 14 | 6.618532  | 18.84766  | 831  | 11  |
| O1-177 | 0.071 | 0.002 | 1.349 | 0.033 | 0.139 | 0.002 | 0.048 | 8E-04 | 2.1   | 945  | 27  | 867  | 14 | 837  | 11 | 940  | 16 | 3.584229  | 11.42857  | 837  | 11  |
| O1-118 | 0.069 | 0.001 | 1.342 | 0.031 | 0.142 | 0.002 | 0.041 | 7E-04 | 4.01  | 892  | 25  | 864  | 13 | 853  | 11 | 809  | 14 | 1.289566  | 4.372197  | 853  | 11  |
| O1-192 | 0.074 | 0.001 | 1.449 | 0.032 | 0.143 | 0.002 | 0.041 | 7E-04 | 1.38  | 1029 | 22  | 910  | 13 | 861  | 12 | 811  | 13 | 5.691057  | 16.32653  | 861  | 12  |
| O1-68  | 0.08  | 0.002 | 1.594 | 0.043 | 0.144 | 0.002 | 0.039 | 6E-04 | 0.97  | 1207 | 33  | 968  | 17 | 866  | 10 | 780  | 12 | 11.77829  | 28.25186  | 866  | 10  |
| O1-151 | 0.071 | 0.003 | 1.403 | 0.054 | 0.144 | 0.002 | 0.044 | 6E-04 | 2.01  | 950  | 86  | 890  | 23 | 867  | 12 | 863  | 11 | 2.652826  | 8.736842  | 867  | 12  |
| O1-148 | 0.073 | 0.002 | 1.457 | 0.033 | 0.146 | 0.002 | 0.028 | 5E-04 | 4.62  | 1002 | 25  | 913  | 14 | 876  | 11 | 556  | 10 | 4.223744  | 12.57485  | 876  | 11  |
| O1-103 | 0.067 | 0.001 | 1.344 | 0.026 | 0.146 | 0.002 | 0.034 | 5E-04 | 1.89  | 828  | 21  | 865  | 11 | 879  | 10 | 675  | 9  | -1.592719 | -6.15942  | 879  | 10  |
| O1-32  | 0.068 | 0.003 | 1.381 | 0.054 | 0.147 | 0.002 | 0.043 | 1E-03 | 1.71  | 866  | 57  | 881  | 23 | 887  | 12 | 842  | 19 | -0.676437 | -2.424942 | 887  | 12  |
| O1-172 | 0.085 | 0.002 | 1.741 | 0.041 | 0.148 | 0.002 | 0.038 | 6E-04 | 0.95  | 1323 | 24  | 1024 | 15 | 890  | 12 | 750  | 11 | 15.05618  | 32.72865  | 890  | 12  |
| O1-17  | 0.079 | 0.002 | 1.635 | 0.047 | 0.151 | 0.002 | 0.041 | 6E-04 | 0.81  | 1160 | 35  | 984  | 18 | 907  | 12 | 803  | 12 | 8.489526  | 21.81034  | 907  | 12  |
| O1-56  | 0.07  | 0.002 | 1.464 | 0.034 | 0.151 | 0.002 | 0.041 | 0.001 | 7.13  | 934  | 29  | 916  | 14 | 908  | 10 | 821  | 20 | 0.881057  | 2.783726  | 908  | 10  |
| O1-133 | 0.076 | 0.002 | 1.597 | 0.045 | 0.152 | 0.002 | 0.045 | 9E-04 | 2.06  | 1101 | 34  | 969  | 18 | 912  | 12 | 885  | 17 | 6.25      | 17.16621  | 912  | 12  |
| O1-187 | 0.082 | 0.003 | 1.763 | 0.067 | 0.156 | 0.002 | 0.047 | 7E-04 | 1.83  | 1241 | 82  | 1032 | 25 | 936  | 14 | 921  | 13 | 10.25641  | 24.57695  | 936  | 14  |
| O1-121 | 0.071 | 0.002 | 1.528 | 0.04  | 0.157 | 0.002 | 0.049 | 9E-04 | 2.53  | 945  | 30  | 942  | 16 | 941  | 13 | 969  | 18 | 0.10627   | 0.42328   | 941  | 13  |
| O1-81  | 0.086 | 0.002 | 1.977 | 0.045 | 0.168 | 0.002 | 0.038 | 6E-04 | 1.83  | 1328 | 26  | 1108 | 15 | 999  | 11 | 757  | 12 | 10.91091  | 24.7741   | 999  | 11  |
| O1-18  | 0.076 | 0.001 | 1.845 | 0.031 | 0.175 | 0.002 | 0.05  | 6E-04 | 1.65  | 1108 | 16  | 1061 | 11 | 1039 | 12 | 977  | 12 | 2.117421  | 6.227437  | 1108 | 16  |
| O1-195 | 0.079 | 0.002 | 1.929 | 0.05  | 0.177 | 0.003 | 0.053 | 8E-04 | 5.21  | 1168 | 60  | 1091 | 17 | 1053 | 15 | 1046 | 14 | 3.608737  | 9.84589   | 1168 | 60  |
| O1-73  | 0.08  | 0.002 | 2.08  | 0.063 | 0.19  | 0.003 | 0.055 | 1E-03 | 1.14  | 1185 | 38  | 1142 | 21 | 1120 | 14 | 1083 | 18 | 1.964286  | 5.485232  | 1185 | 38  |
| O1-40  | 0.08  | 0.002 | 2.028 | 0.044 | 0.184 | 0.002 | 0.047 | 9E-04 | 5.06  | 1195 | 25  | 1125 | 15 | 1089 | 11 | 919  | 17 | 3.305785  | 8.870293  | 1195 | 25  |
| O1-130 | 0.083 | 0.003 | 2.1   | 0.059 | 0.183 | 0.003 | 0.055 | 7E-04 | 4.3   | 1271 | 63  | 1149 | 19 | 1086 | 14 | 1075 | 14 | 5.801105  | 14.55547  | 1271 | 63  |
| O1-128 | 0.092 | 0.002 | 3.126 | 0.073 | 0.247 | 0.004 | 0.07  | 0.001 | 2.17  | 1466 | 24  | 1439 | 18 | 1421 | 18 | 1372 | 23 | 1.266714  | 3.069577  | 1466 | 24  |
| O1-75  | 0.094 | 0.002 | 3.039 | 0.053 | 0.234 | 0.003 | 0.069 | 9E-04 | 1.29  | 1509 | 17  | 1417 | 13 | 1357 | 14 | 1347 | 16 | 4.421518  | 10.0729   | 1509 | 17  |
| O1-193 | 0.098 | 0.008 | 3.575 | 0.266 | 0.264 | 0.005 | 0.077 | 0.001 | 0.68  | 1588 | 149 | 1544 | 59 | 1512 | 27 | 1506 | 23 | 2.116402  | 4.785894  | 1588 | 149 |
| O1-134 | 0.099 | 0.003 | 3.411 | 0.095 | 0.251 | 0.004 | 0.073 | 1E-03 | 2.98  | 1596 | 60  | 1507 | 22 | 1444 | 18 | 1432 | 18 | 4.362881  | 9.52381   | 1596 | 60  |
| O1-100 | 0.102 | 0.002 | 3.719 | 0.09  | 0.265 | 0.004 | 0.056 | 0.001 | 2.97  | 1654 | 26  | 1575 | 19 | 1517 | 18 | 1099 | 22 | 3.823336  | 8.28295   | 1654 | 26  |
| O1-94  | 0.109 | 0.002 | 4.389 | 0.085 | 0.291 | 0.004 | 0.06  | 9E-04 | 2.81  | 1789 | 18  | 1710 | 16 | 1645 | 18 | 1184 | 18 | 3.951368  | 8.049189  | 1789 | 18  |
| O1-194 | 0.111 | 0.002 | 4.048 | 0.088 | 0.266 | 0.004 | 0.076 | 0.001 | 3.74  | 1808 | 20  | 1644 | 18 | 1519 | 20 | 1482 | 25 | 8.229098  | 15.98451  | 1808 | 20  |
| O1-29  | 0.112 | 0.002 | 4.24  | 0.067 | 0.275 | 0.003 | 0.081 | 0.001 | 19.12 | 1828 | 14  | 1682 | 13 | 1567 | 15 | 1571 | 23 | 7.338864  | 14.2779   | 1828 | 14  |
| O1-09  | 0.112 | 0.003 | 4.867 | 0.119 | 0.315 | 0.005 | 0.087 | 0.002 | 2.53  | 1831 | 24  | 1797 | 21 | 1767 | 23 | 1688 | 33 | 1.697793  | 3.495358  | 1831 | 24  |
| O1-160 | 0.129 | 0.003 | 5.845 | 0.143 | 0.329 | 0.005 | 0.095 | 0.002 | 2.1   | 2084 | 23  | 1953 | 21 | 1832 | 24 | 1833 | 34 | 6.604803  | 12.09213  | 2084 | 23  |
| O1-90  | 0.145 | 0.003 | 7.203 | 0.149 | 0.36  | 0.004 | 0.091 | 0.001 | 1.88  | 2292 | 20  | 2137 | 18 | 1980 | 21 | 1764 | 26 | 7.929293  | 13.61257  | 2292 | 20  |
| O1-42  | 0.162 | 0.002 | 9.142 | 0.129 | 0.41  | 0.004 | 0.098 | 0.001 | 9.33  | 2474 | 12  | 2352 | 13 | 2214 | 19 | 1887 | 26 | 6.233062  | 10.5093   | 2474 | 12  |
| O1-87  | 0.168 | 0.003 | 9.852 | 0.191 | 0.425 | 0.005 | 0.111 | 0.002 | 1.52  | 2540 | 17  | 2421 | 18 | 2283 | 23 | 2134 | 29 | 6.044678  | 10.11811  | 2540 | 17  |
| O1-135 | 0.17  | 0.004 | 9.699 | 0.241 | 0.413 | 0.006 | 0.114 | 0.002 | 2.61  | 2559 | 23  | 2407 | 23 | 2231 | 27 | 2175 | 40 | 7.888839  | 12.81751  | 2559 | 23  |



Table DR11 Raw data of zircon U-Pb ages of sample 731C-6R-1W

| Grain  | Apparent Ages (Ma)                      |       |                                        |       |                                        |       |                                         |       |       |                                         | Corr.% discordant |                                        |    |                                        |     | Best Age<br>(Ma)                        | 1σ  |                                            |                                            |      |     |
|--------|-----------------------------------------|-------|----------------------------------------|-------|----------------------------------------|-------|-----------------------------------------|-------|-------|-----------------------------------------|-------------------|----------------------------------------|----|----------------------------------------|-----|-----------------------------------------|-----|--------------------------------------------|--------------------------------------------|------|-----|
|        | <sup>207</sup> Pb/<br><sup>206</sup> Pb | 1σ    | <sup>207</sup> Pb/<br><sup>235</sup> U | 1σ    | <sup>206</sup> Pb/<br><sup>238</sup> U | 1σ    | <sup>208</sup> Pb/<br><sup>232</sup> Th | 1σ    | U/Th  | <sup>207</sup> Pb/<br><sup>206</sup> Pb | 1σ                | <sup>207</sup> Pb/<br><sup>235</sup> U | 1σ | <sup>206</sup> Pb/<br><sup>238</sup> U | 1σ  | <sup>208</sup> Pb/<br><sup>232</sup> Th | 1σ  | <sup>206</sup> /238<br><sup>207</sup> /235 | <sup>207</sup> /206<br><sup>206</sup> /238 |      |     |
|        |                                         |       |                                        |       |                                        |       |                                         |       |       |                                         |                   |                                        |    |                                        |     |                                         |     |                                            |                                            |      |     |
| O2-94  | 0.051                                   | 0.002 | 0.066                                  | 0.002 | 0.009                                  | 1E-04 | 0.002                                   | 4E-05 | 1.27  | 250                                     | 47                | 65                                     | 2  | 60.1                                   | 0.8 | 42.8                                    | 0.8 | 8.153078                                   | 75.96                                      | 60.1 | 0.8 |
| O2-71  | 0.046                                   | 0.002 | 0.067                                  | 0.003 | 0.011                                  | 2E-04 | 0.003                                   | 5E-05 | 1.2   |                                         | 100               | 66                                     | 3  | 67.5                                   | 1   | 68                                      | 1   | -2.222222                                  | \                                          | 67.5 | 1   |
| O2-138 | 0.049                                   | 0.002 | 0.074                                  | 0.002 | 0.011                                  | 1E-04 | 0.004                                   | 4E-05 | 5.33  | 134                                     | 80                | 73                                     | 2  | 70.9                                   | 0.8 | 70.7                                    | 0.7 | 2.961918                                   | 47.08955                                   | 70.9 | 0.8 |
| O2-107 | 0.05                                    | 0.001 | 0.077                                  | 0.002 | 0.011                                  | 1E-04 | 0.003                                   | 4E-05 | 1.07  | 196                                     | 38                | 75                                     | 2  | 71.3                                   | 0.8 | 60.9                                    | 0.8 | 5.189341                                   | 63.62245                                   | 71.3 | 0.8 |
| O2-168 | 0.054                                   | 0.003 | 0.095                                  | 0.005 | 0.013                                  | 2E-04 | 0.004                                   | 7E-05 | 0.76  | 390                                     | 84                | 92                                     | 4  | 81                                     | 1   | 80                                      | 1   | 13.58025                                   | 79.23077                                   | 81   | 1   |
| O2-189 | 0.049                                   | 0.001 | 0.088                                  | 0.002 | 0.013                                  | 2E-04 | 0.003                                   | 5E-05 | 0.18  | 138                                     | 32                | 86                                     | 2  | 83.8                                   | 1   | 65                                      | 1   | 2.625298                                   | 39.27536                                   | 83.8 | 1   |
| O2-103 | 0.052                                   | 0.002 | 0.096                                  | 0.004 | 0.013                                  | 2E-04 | 0.004                                   | 7E-05 | 1.3   | 280                                     | 64                | 93                                     | 3  | 86                                     | 1   | 79                                      | 1   | 8.139535                                   | 69.28571                                   | 86   | 1   |
| O2-102 | 0.052                                   | 0.002 | 0.098                                  | 0.003 | 0.014                                  | 2E-04 | 0.003                                   | 5E-05 | 1.96  | 279                                     | 55                | 95                                     | 3  | 88                                     | 1   | 60                                      | 1   | 7.954545                                   | 68.45878                                   | 88   | 1   |
| O2-45  | 0.052                                   | 0.006 | 0.1                                    | 0.011 | 0.014                                  | 3E-04 | 0.004                                   | 6E-05 | 1.12  | 303                                     | 262               | 97                                     | 10 | 89                                     | 2   | 88                                      | 1   | 8.988764                                   | 70.62706                                   | 89   | 2   |
| O2-114 | 0.05                                    | 0.001 | 0.096                                  | 0.002 | 0.014                                  | 2E-04 | 0.004                                   | 5E-05 | 0.97  | 175                                     | 37                | 93                                     | 2  | 90.1                                   | 1   | 77                                      | 1   | 3.218646                                   | 48.51429                                   | 90.1 | 1   |
| O2-70  | 0.05                                    | 0.004 | 0.098                                  | 0.008 | 0.014                                  | 3E-04 | 0.004                                   | 2E-04 | 1.56  | 185                                     | 145               | 95                                     | 7  | 91                                     | 2   | 87                                      | 3   | 4.395604                                   | 50.81081                                   | 91   | 2   |
| O2-92  | 0.05                                    | 7E-04 | 0.097                                  | 0.002 | 0.014                                  | 2E-04 | 0.004                                   | 5E-05 | 2.58  | 172                                     | 18                | 94                                     | 1  | 91                                     | 1   | 83                                      | 1   | 3.296703                                   | 47.09302                                   | 91   | 1   |
| O2-99  | 0.053                                   | 0.001 | 0.11                                   | 0.003 | 0.015                                  | 2E-04 | 0.003                                   | 6E-05 | 3.34  | 340                                     | 31                | 106                                    | 2  | 96                                     | 1   | 68                                      | 1   | 10.41667                                   | 71.76471                                   | 96   | 1   |
| O2-41  | 0.053                                   | 0.002 | 0.114                                  | 0.003 | 0.016                                  | 2E-04 | 0.005                                   | 7E-05 | 1.09  | 320                                     | 44                | 110                                    | 3  | 100                                    | 1   | 96                                      | 1   | 10                                         | 68.75                                      | 100  | 1   |
| O2-66  | 0.051                                   | 0.002 | 0.111                                  | 0.005 | 0.016                                  | 2E-04 | 0.005                                   | 1E-04 | 1.89  | 236                                     | 78                | 107                                    | 5  | 102                                    | 1   | 99                                      | 2   | 4.901961                                   | 56.77966                                   | 102  | 1   |
| O2-21  | 0.055                                   | 0.002 | 0.123                                  | 0.004 | 0.016                                  | 2E-04 | 0.005                                   | 7E-05 | 1.19  | 425                                     | 46                | 117                                    | 3  | 103                                    | 1   | 98                                      | 1   | 13.59223                                   | 75.76471                                   | 103  | 1   |
| O2-121 | 0.053                                   | 0.005 | 0.117                                  | 0.011 | 0.016                                  | 4E-04 | 0.005                                   | 2E-04 | 1.63  | 314                                     | 167               | 112                                    | 10 | 103                                    | 2   | 109                                     | 4   | 8.737864                                   | 67.19745                                   | 103  | 2   |
| O2-150 | 0.046                                   | 0.004 | 0.112                                  | 0.009 | 0.018                                  | 3E-04 | 0.002                                   | 1E-04 | 0.13  |                                         | 189               | 108                                    | 9  | 113                                    | 2   | 30                                      | 2   | -4.424779                                  |                                            | 113  | 2   |
| O2-32  | 0.053                                   | 0.002 | 0.131                                  | 0.004 | 0.018                                  | 2E-04 | 0.012                                   | 4E-04 | 18.79 | 344                                     | 50                | 125                                    | 4  | 114                                    | 1   | 243                                     | 7   | 9.649123                                   | 66.86047                                   | 114  | 1   |
| O2-54  | 0.053                                   | 0.001 | 0.158                                  | 0.003 | 0.022                                  | 2E-04 | 0.005                                   | 7E-05 | 1.81  | 312                                     | 31                | 149                                    | 3  | 139                                    | 2   | 97                                      | 1   | 7.194245                                   | 55.44872                                   | 139  | 2   |
| O2-131 | 0.056                                   | 0.002 | 0.171                                  | 0.005 | 0.022                                  | 3E-04 | 0.006                                   | 9E-05 | 1.07  | 455                                     | 49                | 160                                    | 5  | 141                                    | 2   | 128                                     | 2   | 13.47518                                   | 69.01099                                   | 141  | 2   |
| O2-172 | 0.055                                   | 0.002 | 0.182                                  | 0.007 | 0.024                                  | 3E-04 | 0.006                                   | 2E-04 | 1.89  | 428                                     | 67                | 170                                    | 6  | 152                                    | 2   | 129                                     | 3   | 11.84211                                   | 64.48598                                   | 152  | 2   |
| O2-127 | 0.054                                   | 0.002 | 0.216                                  | 0.006 | 0.029                                  | 3E-04 | 0.01                                    | 2E-04 | 2.41  | 369                                     | 43                | 198                                    | 5  | 184                                    | 2   | 206                                     | 4   | 7.608696                                   | 50.1355                                    | 184  | 2   |
| O2-64  | 0.054                                   | 0.001 | 0.238                                  | 0.006 | 0.032                                  | 4E-04 | 0.009                                   | 2E-04 | 2.97  | 374                                     | 36                | 217                                    | 5  | 203                                    | 2   | 188                                     | 3   | 6.896552                                   | 45.72193                                   | 203  | 2   |
| O2-86  | 0.059                                   | 0.001 | 0.315                                  | 0.007 | 0.039                                  | 5E-04 | 0.022                                   | 3E-04 | 3.36  | 560                                     | 27                | 278                                    | 5  | 246                                    | 3   | 445                                     | 6   | 13.00813                                   | 56.07143                                   | 246  | 3   |
| O2-167 | 0.055                                   | 0.002 | 0.302                                  | 0.011 | 0.04                                   | 5E-04 | 0.016                                   | 4E-04 | 2.86  | 410                                     | 60                | 268                                    | 9  | 252                                    | 3   | 324                                     | 7   | 6.349206                                   | 38.53659                                   | 252  | 3   |
| O2-49  | 0.055                                   | 0.001 | 0.313                                  | 0.007 | 0.041                                  | 4E-04 | 0.012                                   | 2E-04 | 1.72  | 415                                     | 28                | 276                                    | 5  | 260                                    | 3   | 248                                     | 3   | 6.153846                                   | 37.3494                                    | 260  | 3   |
| O2-78  | 0.053                                   | 0.001 | 0.314                                  | 0.006 | 0.043                                  | 6E-04 | 0.013                                   | 2E-04 | 21.08 | 340                                     | 55                | 277                                    | 5  | 270                                    | 3   | 269                                     | 3   | 2.592593                                   | 20.58824                                   | 270  | 3   |
| O2-181 | 0.06                                    | 0.001 | 0.411                                  | 0.01  | 0.05                                   | 6E-04 | 0.015                                   | 2E-04 | 1.43  | 597                                     | 30                | 350                                    | 7  | 314                                    | 4   | 292                                     | 4   | 11.46497                                   | 47.40369                                   | 314  | 4   |
| O2-132 | 0.059                                   | 0.002 | 0.488                                  | 0.016 | 0.06                                   | 7E-04 | 0.019                                   | 2E-04 | 2.32  | 564                                     | 78                | 403                                    | 11 | 376                                    | 4   | 372                                     | 3   | 7.180851                                   | 33.33333                                   | 376  | 4   |
| O2-50  | 0.061                                   | 0.002 | 0.529                                  | 0.014 | 0.063                                  | 7E-04 | 0.019                                   | 4E-04 | 2.67  | 652                                     | 39                | 431                                    | 10 | 391                                    | 4   | 382                                     | 7   | 10.23018                                   | 40.03067                                   | 391  | 4   |
| O2-05  | 0.062                                   | 0.002 | 0.535                                  | 0.015 | 0.063                                  | 9E-04 | 0.018                                   | 5E-04 | 4.23  | 667                                     | 35                | 435                                    | 10 | 393                                    | 5   | 368                                     | 10  | 10.68702                                   | 41.07946                                   | 393  | 5   |
| O2-38  | 0.066                                   | 0.002 | 0.631                                  | 0.019 | 0.07                                   | 9E-04 | 0.021                                   | 3E-04 | 0.59  | 793                                     | 42                | 497                                    | 12 | 435                                    | 5   | 411                                     | 6   | 14.25287                                   | 45.14502                                   | 435  | 5   |
| O2-134 | 0.061                                   | 0.001 | 0.586                                  | 0.009 | 0.07                                   | 7E-04 | 0.013                                   | 2E-04 | 1     | 635                                     | 19                | 468                                    | 6  | 435                                    | 4   | 271                                     | 3   | 7.586207                                   | 31.49606                                   | 435  | 4   |
| O2-53  | 0.064                                   | 0.001 | 0.63                                   | 0.014 | 0.072                                  | 8E-04 | 0.032                                   | 5E-04 | 3.81  | 735                                     | 27                | 496                                    | 8  | 446                                    | 5   | 635                                     | 9   | 11.21076                                   | 39.31973                                   | 446  | 5   |
| O2-118 | 0.063                                   | 0.002 | 0.625                                  | 0.019 | 0.072                                  | 9E-04 | 0.019                                   | 4E-04 | 3.03  | 720                                     | 44                | 493                                    | 12 | 446                                    | 5   | 381                                     | 7   | 10.53812                                   | 38.05556                                   | 446  | 5   |
| O2-184 | 0.063                                   | 0.004 | 0.622                                  | 0.042 | 0.072                                  | 1E-03 | 0.022                                   | 1E-03 | 5.53  | 704                                     | 151               | 491                                    | 26 | 446                                    | 6   | 440                                     | 19  | 10.08969                                   | 36.64773                                   | 446  | 6   |
| O2-87  | 0.057                                   | 0.002 | 0.574                                  | 0.013 | 0.073                                  | 9E-04 | 0.023                                   | 3E-04 | 5.88  | 488                                     | 59                | 461                                    | 9  | 455                                    | 6   | 454                                     | 6   | 1.318681                                   | 6.762295                                   | 455  | 6   |
| O2-139 | 0.064                                   | 0.002 | 0.642                                  | 0.015 | 0.073                                  | 8E-04 | 0.022                                   | 3E-04 | 0.98  | 732                                     | 30                | 503                                    | 9  | 455                                    | 5   | 439                                     | 6   | 10.54945                                   | 37.84153                                   | 455  | 5   |
| O2-97  | 0.062                                   | 0.001 | 0.68                                   | 0.013 | 0.079                                  | 1E-03 | 0.019                                   | 3E-04 | 2.26  | 684                                     | 22                | 527                                    | 8  | 491                                    | 6   | 389                                     | 6   | 7.331976                                   | 28.21637                                   | 491  | 6   |
| O2-152 | 0.063                                   | 0.001 | 0.694                                  | 0.014 | 0.08                                   | 9E-04 | 0.02                                    | 3E-04 | 1.52  | 715                                     | 24                | 535                                    | 8  | 494                                    | 5   | 402                                     | 5   | 8.299595                                   | 30.90909                                   | 494  | 5   |
| O2-163 | 0.061                                   | 0.002 | 0.669                                  | 0.017 | 0.08                                   | 9E-04 | 0.025                                   | 3E-04 | 4.94  | 632                                     | 60                | 520                                    | 10 | 495                                    | 5   | 491                                     | 5   | 5.050505                                   | 21.67722                                   | 495  | 5   |
| O2-37  | 0.059                                   | 0.001 | 0.657                                  | 0.011 | 0.08                                   | 8E-04 | 0.022                                   | 3E-04 | 0.92  | 583                                     | 19                | 512                                    | 7  | 497                                    | 5   | 440                                     | 5   | 3.018109                                   | 14.75129                                   | 497  | 5   |
| O2-76  | 0.058                                   | 1E-03 | 0.654                                  | 0.012 | 0.081                                  | 0.001 | 0.019                                   | 4E-04 | 17.94 | 542                                     | 19                | 511                                    | 7  | 504                                    | 6   | 376                                     | 8   | 1.388889                                   | 7.01107                                    | 504  | 6   |
| O2-117 | 0.057                                   | 0.002 | 0.66                                   | 0.017 | 0.084                                  | 9E-04 | 0.026                                   | 3E-04 | 2.93  | 498                                     | 62                | 515                                    | 10 | 518                                    | 5   | 519                                     | 5   | -0.579151                                  | -4.016064                                  | 518  | 5   |
| O2-06  | 0.07                                    | 0.001 | 0.856                                  | 0.017 | 0.089                                  | 0.001 | 0.015                                   | 2E-04 | 1.67  | 920                                     | 21                | 628                                    | 9  | 550                                    | 7   | 303                                     | 5   | 14.18182                                   | 40.21739                                   | 550  | 7   |
| O2-182 | 0.06                                    | 0.002 | 0.732                                  | 0.017 | 0.089                                  | 0.001 | 0.028                                   | 3E-04 | 5.61  | 593                                     | 58                | 558                                    | 10 | 550                                    | 6   | 548                                     | 6   | 1.454545                                   | 7.251265                                   | 550  | 6   |
| O2-147 | 0.062                                   | 0.001 | 0.76                                   | 0.014 | 0.089                                  | 9E-04 | 0.024                                   | 4E-04 | 7.87  | 668                                     | 23                | 574                                    | 8  | 551                                    | 6   | 483                                     | 8   | 4.174229                                   | 17.51497                                   | 551  | 6   |
| O2-33  | 0.064                                   | 0.001 | 0.801                                  | 0.017 | 0.091                                  | 1E-03 | 0.011                                   | 3E-04 | 8.42  | 736                                     | 26                | 597                                    | 9  | 561                                    | 6   | 218                                     | 6   | 6.417112                                   | 23.77717                                   | 561  | 6   |
| O2-128 | 0.067                                   | 0.001 | 0.848                                  | 0.014 | 0.092                                  | 9E-04 | 0.017                                   | 2E-04 | 1.3   | 823                                     | 19                | 623                                    | 8  | 570                                    | 5   | 349                                     | 4   | 9.298246                                   | 30.74119                                   | 570  | 5   |
| O2-160 | 0.066                                   | 0.003 | 0.847                                  | 0.04  | 0.093                                  | 0.001 | 0.028                                   | 3E-04 | 0.95  | 811                                     | 105               | 623                                    | 22 | 572                                    | 7   | 565                                     | 5   | 8.916084                                   | 29.46979                                   | 572  | 7   |
| O2-01  | 0.062                                   | 9E-04 | 0.788                                  | 0.012 | 0.093                                  | 0.001 | 0.025                                   | 3E-04 | 3.78  | 657                                     | 15                | 590                                    | 7  | 573                                    | 7   | 493                                     | 6   | 2.966841                                   | 12.78539                                   | 573  | 7   |
| O2-75  | 0.058                                   | 9E-04 | 0.756                                  | 0.013 | 0.094                                  | 0.001 | 0.027                                   | 4E-04 | 4.45  | 548                                     | 18                | 571                                    | 8  | 577                                    | 7   | 546                                     | 8   | -1.039861                                  | -5.291971                                  | 577  | 7   |
| O2-122 | 0.06                                    | 9E-04 | 0.778                                  | 0.011 | 0.094                                  | 9E-04 | 0.014                                   | 2E-04 | 2.19  | 611                                     | 15                | 584                                    | 6  | 577                                    | 5   | 290                                     | 3   | 1.213172                                   | 5.564648                                   | 577  | 5   |
| O2-04  | 0.063                                   | 0.001 | 0.823                                  | 0.015 | 0.094                                  | 0.001 | 0.006                                   | 9E-05 | 0.95  | 720                                     | 19                | 610                                    | 8  | 581                                    | 7   | 121                                     | 2   | 4.991394                                   | 19.30556                                   | 581  | 7   |
| O2-39  | 0.064                                   | 0.002 | 0.831                                  | 0.024 | 0.095                                  | 0.001 | 0.029                                   | 4E-04 | 6.87  | 734                                     | 68                | 614                                    | 14 | 582                                    | 6   | 578                                     | 8   | 5.498282                                   | 20.70845                                   | 582  | 6   |
| O2-109 | 0.064                                   | 0.002 | 0.839                                  | 0.023 | 0.095                                  | 0.001 | 0.029                                   | 3E-04 | 3.11  | 744                                     | 64                | 619                                    | 13 | 585                                    | 6   | 580                                     | 6   | 5.811966                                   | 21.37097                                   | 585  | 6   |
| O2-95  | 0.065                                   | 0.001 | 0.86                                   | 0.015 | 0.096                                  | 0.001 | 0.03                                    | 4E-04 | 1.4   | 762                                     | 18                | 630                                    | 8  | 594                                    | 7   | 596                                     | 7   | 6.060606                                   | 22.04724                                   | 594  | 7   |
| O2-183 | 0.062                                   | 0.002 | 0.827                                  | 0.023 | 0.098                                  | 0.001 | 0.03                                    | 3E-04 | 4.41  | 657                                     | 67                | 612                                    | 13 |                                        |     |                                         |     |                                            |                                            |      |     |

|        |       |       |       |       |       |       |       |       |      |      |    |      |    |      |    |      |    |           |           |      |    |
|--------|-------|-------|-------|-------|-------|-------|-------|-------|------|------|----|------|----|------|----|------|----|-----------|-----------|------|----|
| O2-59  | 0.074 | 0.002 | 1.619 | 0.035 | 0.158 | 0.002 | 0.048 | 6E-04 | 7.49 | 1045 | 50 | 978  | 14 | 948  | 10 | 943  | 12 | 3.164557  | 9.282297  | 948  | 10 |
| O2-108 | 0.071 | 0.001 | 1.552 | 0.025 | 0.158 | 0.002 | 0.041 | 5E-04 | 1.76 | 959  | 17 | 951  | 10 | 948  | 9  | 817  | 10 | 0.316456  | 1.147028  | 948  | 9  |
| O2-124 | 0.073 | 0.001 | 1.594 | 0.025 | 0.159 | 0.002 | 0.04  | 5E-04 | 0.79 | 1006 | 16 | 968  | 10 | 951  | 9  | 793  | 9  | 1.787592  | 5.467197  | 951  | 9  |
| O2-155 | 0.077 | 0.002 | 1.694 | 0.045 | 0.16  | 0.002 | 0.048 | 5E-04 | 2.05 | 1114 | 58 | 1006 | 17 | 957  | 10 | 949  | 9  | 5.120167  | 14.09336  | 957  | 10 |
| O2-74  | 0.075 | 0.001 | 1.667 | 0.026 | 0.161 | 0.002 | 0.046 | 6E-04 | 1.83 | 1067 | 14 | 996  | 10 | 964  | 12 | 915  | 11 | 3.319502  | 9.653233  | 964  | 12 |
| O2-89  | 0.066 | 0.001 | 1.478 | 0.027 | 0.162 | 0.002 | 0.031 | 4E-04 | 1.4  | 808  | 19 | 921  | 11 | 969  | 12 | 614  | 8  | -4.95356  | -19.92574 | 969  | 12 |
| O2-104 | 0.072 | 0.001 | 1.66  | 0.024 | 0.167 | 0.002 | 0.039 | 5E-04 | 4.15 | 990  | 14 | 993  | 9  | 995  | 10 | 782  | 9  | -0.201005 | -0.505051 | 995  | 10 |
| O2-84  | 0.077 | 0.001 | 1.79  | 0.03  | 0.167 | 0.002 | 0.035 | 5E-04 | 6.06 | 1134 | 16 | 1042 | 11 | 998  | 12 | 696  | 10 | 4.408818  | 11.99295  | 998  | 12 |
| O2-47  | 0.075 | 0.001 | 1.818 | 0.028 | 0.176 | 0.002 | 0.035 | 4E-04 | 1.98 | 1064 | 16 | 1052 | 10 | 1046 | 10 | 695  | 8  | 0.573614  | 1.691729  | 1064 | 16 |
| O2-129 | 0.076 | 0.001 | 1.89  | 0.031 | 0.181 | 0.002 | 0.027 | 4E-04 | 4.64 | 1087 | 18 | 1078 | 11 | 1073 | 10 | 541  | 7  | 0.465983  | 1.287948  | 1087 | 18 |
| O2-141 | 0.08  | 0.001 | 1.993 | 0.029 | 0.182 | 0.002 | 0.028 | 3E-04 | 2.08 | 1186 | 14 | 1113 | 10 | 1077 | 10 | 552  | 6  | 3.342618  | 9.190556  | 1186 | 14 |
| O2-11  | 0.084 | 0.001 | 2.415 | 0.035 | 0.209 | 0.003 | 0.058 | 7E-04 | 3.48 | 1289 | 13 | 1247 | 11 | 1223 | 13 | 1146 | 13 | 1.962388  | 5.120248  | 1289 | 13 |
| O2-180 | 0.085 | 0.002 | 3.179 | 0.062 | 0.273 | 0.003 | 0.078 | 0.001 | 0.93 | 1306 | 21 | 1452 | 15 | 1554 | 16 | 1514 | 22 | -6.563707 | -18.98928 | 1306 | 21 |
| O2-17  | 0.086 | 0.001 | 3.265 | 0.049 | 0.275 | 0.003 | 0.07  | 8E-04 | 1.76 | 1343 | 14 | 1473 | 12 | 1565 | 16 | 1366 | 16 | -5.878594 | -16.53016 | 1343 | 14 |
| O2-159 | 0.088 | 0.002 | 2.441 | 0.045 | 0.202 | 0.002 | 0.057 | 8E-04 | 2.59 | 1374 | 20 | 1255 | 13 | 1187 | 12 | 1125 | 15 | 5.728728  | 13.6099   | 1374 | 20 |
| O2-29  | 0.092 | 0.002 | 2.743 | 0.047 | 0.216 | 0.002 | 0.052 | 7E-04 | 0.7  | 1473 | 17 | 1340 | 13 | 1259 | 13 | 1031 | 13 | 6.433678  | 14.52817  | 1473 | 17 |
| O2-111 | 0.092 | 0.001 | 3.081 | 0.045 | 0.242 | 0.002 | 0.065 | 8E-04 | 3.37 | 1473 | 14 | 1428 | 11 | 1398 | 13 | 1266 | 15 | 2.145923  | 5.09165   | 1473 | 14 |
| O2-144 | 0.094 | 0.001 | 3.46  | 0.053 | 0.267 | 0.003 | 0.069 | 8E-04 | 1.07 | 1506 | 15 | 1518 | 12 | 1528 | 13 | 1349 | 15 | -0.65445  | -1.460823 | 1506 | 15 |
| O2-79  | 0.095 | 0.001 | 3.147 | 0.053 | 0.24  | 0.003 | 0.064 | 8E-04 | 1.26 | 1529 | 15 | 1444 | 13 | 1387 | 17 | 1261 | 16 | 4.109589  | 9.287116  | 1529 | 15 |
| O2-56  | 0.095 | 0.002 | 3.362 | 0.058 | 0.256 | 0.003 | 0.068 | 9E-04 | 1.61 | 1531 | 17 | 1496 | 13 | 1471 | 14 | 1330 | 17 | 1.699524  | 3.919007  | 1531 | 17 |
| O2-123 | 0.096 | 0.001 | 3.503 | 0.049 | 0.265 | 0.003 | 0.072 | 8E-04 | 0.64 | 1547 | 13 | 1528 | 11 | 1514 | 13 | 1400 | 15 | 0.924703  | 2.133161  | 1547 | 13 |
| O2-30  | 0.099 | 0.002 | 3.455 | 0.053 | 0.252 | 0.003 | 0.065 | 8E-04 | 1.36 | 1610 | 14 | 1517 | 12 | 1451 | 14 | 1265 | 15 | 4.548587  | 9.875776  | 1610 | 14 |
| O2-58  | 0.103 | 0.002 | 3.679 | 0.065 | 0.259 | 0.003 | 0.074 | 1E-03 | 1.83 | 1682 | 17 | 1567 | 14 | 1483 | 14 | 1446 | 18 | 5.664194  | 11.83115  | 1682 | 17 |
| O2-83  | 0.106 | 0.002 | 4.084 | 0.066 | 0.278 | 0.004 | 0.045 | 6E-04 | 3.84 | 1738 | 14 | 1651 | 13 | 1583 | 18 | 883  | 12 | 4.295641  | 8.918297  | 1738 | 14 |
| O2-164 | 0.107 | 0.002 | 4.169 | 0.069 | 0.281 | 0.003 | 0.084 | 0.001 | 4.01 | 1757 | 16 | 1668 | 14 | 1598 | 15 | 1627 | 20 | 4.380476  | 9.049516  | 1757 | 16 |
| O2-105 | 0.113 | 0.002 | 4.61  | 0.069 | 0.295 | 0.003 | 0.076 | 9E-04 | 2.41 | 1852 | 13 | 1751 | 12 | 1668 | 16 | 1473 | 17 | 4.976019  | 9.935205  | 1852 | 13 |
| O2-174 | 0.122 | 0.002 | 5.44  | 0.09  | 0.324 | 0.004 | 0.027 | 4E-04 | 4.91 | 1984 | 15 | 1891 | 14 | 1808 | 17 | 543  | 7  | 4.590708  | 8.870968  | 1984 | 15 |
| O2-51  | 0.126 | 0.003 | 6.129 | 0.113 | 0.353 | 0.004 | 0.101 | 0.001 | 2.08 | 2043 | 39 | 1994 | 16 | 1948 | 18 | 1938 | 19 | 2.361396  | 4.650024  | 2043 | 39 |
| O2-23  | 0.131 | 0.002 | 5.98  | 0.084 | 0.331 | 0.004 | 0.09  | 0.001 | 4.85 | 2111 | 11 | 1973 | 12 | 1844 | 18 | 1740 | 20 | 6.995662  | 12.64803  | 2111 | 11 |
| O2-63  | 0.145 | 0.002 | 7.646 | 0.113 | 0.382 | 0.004 | 0.058 | 7E-04 | 1.76 | 2290 | 12 | 2190 | 13 | 2085 | 19 | 1146 | 13 | 5.035971  | 8.951965  | 2290 | 12 |
| O2-82  | 0.154 | 0.002 | 10.02 | 0.155 | 0.471 | 0.006 | 0.079 | 1E-03 | 1.97 | 2392 | 12 | 2437 | 14 | 2489 | 27 | 1540 | 18 | -2.089192 | -4.055184 | 2392 | 12 |
| O2-72  | 0.159 | 0.002 | 8.589 | 0.135 | 0.391 | 0.005 | 0.094 | 0.001 | 0.61 | 2447 | 12 | 2295 | 14 | 2129 | 24 | 1820 | 20 | 7.797088  | 12.9955   | 2447 | 12 |
| O2-146 | 0.161 | 0.003 | 9.291 | 0.149 | 0.42  | 0.004 | 0.11  | 0.001 | 1.54 | 2462 | 14 | 2367 | 15 | 2260 | 19 | 2111 | 25 | 4.734513  | 8.204712  | 2462 | 14 |
| O2-187 | 0.176 | 0.003 | 10.58 | 0.203 | 0.436 | 0.005 | 0.115 | 0.002 | 2.64 | 2616 | 17 | 2487 | 18 | 2332 | 23 | 2204 | 30 | 6.646655  | 10.85627  | 2616 | 17 |
| O2-69  | 0.182 | 0.003 | 11.29 | 0.195 | 0.449 | 0.005 | 0.109 | 0.001 | 1.3  | 2674 | 15 | 2547 | 16 | 2391 | 22 | 2092 | 26 | 6.524467  | 10.5834   | 2674 | 15 |
| O2-100 | 0.185 | 0.003 | 10.73 | 0.182 | 0.421 | 0.005 | 0.102 | 0.001 | 0.56 | 2698 | 14 | 2500 | 16 | 2264 | 23 | 1956 | 24 | 10.42403  | 16.08599  | 2698 | 14 |
| O2-13  | 0.246 | 0.003 | 19.05 | 0.276 | 0.561 | 0.007 | 0.128 | 0.001 | 0.75 | 3160 | 10 | 3044 | 14 | 2872 | 28 | 2439 | 26 | 5.988858  | 9.113924  | 3160 | 10 |

Table DR11 Raw data of zircon U-Pb ages of sample 731C-8R-4W

| Grain  | Apparent Ages (Ma)                      |       |                                        |       |                                        |       |                                         |       |       |                                         | Corr.% discordant |                                        |    |                                        | Best Age<br>(Ma) | 1σ                                      |     |                                            |                                            |      |     |
|--------|-----------------------------------------|-------|----------------------------------------|-------|----------------------------------------|-------|-----------------------------------------|-------|-------|-----------------------------------------|-------------------|----------------------------------------|----|----------------------------------------|------------------|-----------------------------------------|-----|--------------------------------------------|--------------------------------------------|------|-----|
|        | <sup>207</sup> Pb/<br><sup>206</sup> Pb | 1σ    | <sup>207</sup> Pb/<br><sup>235</sup> U | 1σ    | <sup>206</sup> Pb/<br><sup>238</sup> U | 1σ    | <sup>208</sup> Pb/<br><sup>232</sup> Th | 1σ    | U/Th  | <sup>207</sup> Pb/<br><sup>206</sup> Pb | 1σ                | <sup>207</sup> Pb/<br><sup>235</sup> U | 1σ | <sup>206</sup> Pb/<br><sup>238</sup> U | 1σ               | <sup>208</sup> Pb/<br><sup>232</sup> Th | 1σ  | <sup>206</sup> /238<br><sup>207</sup> /235 | <sup>207</sup> /206<br><sup>206</sup> /238 |      |     |
|        |                                         |       |                                        |       |                                        |       |                                         |       |       |                                         |                   |                                        |    |                                        |                  |                                         |     |                                            |                                            |      |     |
| O3-80  | 0.053                                   | 0.002 | 0.042                                  | 0.002 | 0.006                                  | 8E-05 | 0.002                                   | 3E-05 | 0.34  | 336                                     | 78                | 42                                     | 2  | 37                                     | 0.5              | 35.7                                    | 0.6 | 13.51351                                   | 88.9881                                    | 37   | 0.5 |
| O3-178 | 0.048                                   | 0.003 | 0.047                                  | 0.003 | 0.007                                  | 1E-04 | 0.002                                   | 0.002 | 58.17 | 91                                      | 158               | 47                                     | 3  | 45.8                                   | 0.7              | 46                                      | 31  | 2.620087                                   | 49.67033                                   | 45.8 | 0.7 |
| O3-07  | 0.055                                   | 0.001 | 0.068                                  | 0.002 | 0.009                                  | 1E-04 | 0.024                                   | 5E-04 | 66.7  | 397                                     | 28                | 67                                     | 1  | 58.1                                   | 0.8              | 486                                     | 11  | 15.31842                                   | 85.36524                                   | 58.1 | 0.8 |
| O3-55  | 0.052                                   | 0.004 | 0.081                                  | 0.005 | 0.011                                  | 2E-04 | 0.004                                   | 9E-05 | 1.05  | 299                                     | 123               | 79                                     | 5  | 72                                     | 1                | 76                                      | 2   | 9.722222                                   | 75.91973                                   | 72   | 1   |
| O3-22  | 0.054                                   | 0.007 | 0.09                                   | 0.011 | 0.012                                  | 3E-04 | 0.004                                   | 6E-05 | 1.06  | 352                                     | 285               | 88                                     | 10 | 78                                     | 2                | 77                                      | 1   | 12.82051                                   | 77.84091                                   | 78   | 2   |
| O3-38  | 0.05                                    | 0.003 | 0.089                                  | 0.006 | 0.013                                  | 2E-04 | 0.004                                   | 8E-05 | 5.13  | 211                                     | 158               | 86                                     | 6  | 82                                     | 1                | 81                                      | 2   | 4.878049                                   | 61.13744                                   | 82   | 1   |
| O3-153 | 0.054                                   | 0.005 | 0.097                                  | 0.009 | 0.013                                  | 3E-04 | 0.004                                   | 6E-05 | 1.69  | 371                                     | 228               | 94                                     | 9  | 84                                     | 2                | 82                                      | 1   | 11.90476                                   | 77.35849                                   | 84   | 2   |
| O3-154 | 0.05                                    | 0.004 | 0.092                                  | 0.007 | 0.013                                  | 2E-04 | 0.004                                   | 5E-05 | 1.66  | 208                                     | 179               | 89                                     | 7  | 85                                     | 1                | 84                                      | 1   | 4.705882                                   | 59.13462                                   | 85   | 1   |
| O3-124 | 0.05                                    | 0.001 | 0.102                                  | 0.002 | 0.015                                  | 2E-04 | 0.004                                   | 5E-05 | 1.35  | 204                                     | 34                | 99                                     | 2  | 95                                     | 1                | 75                                      | 1   | 4.210526                                   | 53.43137                                   | 95   | 1   |
| O2-50  | 0.047                                   | 0.004 | 0.097                                  | 0.009 | 0.015                                  | 3E-04 | 0.005                                   | 5E-04 | 4.44  | 63                                      | 209               | 94                                     | 8  | 96                                     | 2                | 96                                      | 9   | -2.083333                                  | -52.38095                                  | 96   | 2   |
| O3-06  | 0.055                                   | 0.003 | 0.115                                  | 0.007 | 0.015                                  | 3E-04 | 0.003                                   | 7E-05 | 0.66  | 393                                     | 98                | 111                                    | 6  | 98                                     | 2                | 68                                      | 1   | 13.26531                                   | 75.06361                                   | 98   | 2   |
| O3-89  | 0.052                                   | 0.003 | 0.11                                   | 0.005 | 0.015                                  | 2E-04 | 0.005                                   | 5E-05 | 3.91  | 283                                     | 119               | 106                                    | 5  | 99                                     | 1                | 98                                      | 1   | 7.070707                                   | 65.01767                                   | 99   | 1   |
| O2-61  | 0.05                                    | 0.002 | 0.109                                  | 0.005 | 0.016                                  | 2E-04 | 0.005                                   | 5E-05 | 2.05  | 188                                     | 107               | 105                                    | 4  | 101                                    | 1                | 100.8                                   | 0.9 | 3.960396                                   | 46.2766                                    | 101  | 1   |
| O3-161 | 0.05                                    | 0.006 | 0.11                                   | 0.014 | 0.016                                  | 4E-04 | 0.005                                   | 2E-04 | 1.75  | 184                                     | 266               | 106                                    | 12 | 103                                    | 2                | 102                                     | 4   | 2.912621                                   | 44.02174                                   | 103  | 2   |
| O2-42  | 0.056                                   | 0.002 | 0.128                                  | 0.004 | 0.017                                  | 2E-04 | 0.005                                   | 7E-05 | 1.19  | 441                                     | 43                | 122                                    | 3  | 106                                    | 1                | 97                                      | 1   | 15.09434                                   | 75.96372                                   | 106  | 1   |
| O3-93  | 0.053                                   | 0.004 | 0.122                                  | 0.009 | 0.017                                  | 3E-04 | 0.005                                   | 6E-05 | 1.58  | 321                                     | 166               | 117                                    | 8  | 107                                    | 2                | 106                                     | 1   | 9.345794                                   | 66.66667                                   | 107  | 2   |
| O3-128 | 0.055                                   | 0.002 | 0.129                                  | 0.005 | 0.017                                  | 3E-04 | 0.005                                   | 1E-04 | 1.09  | 414                                     | 69                | 123                                    | 5  | 109                                    | 2                | 107                                     | 2   | 12.84404                                   | 73.6715                                    | 109  | 2   |
| O3-143 | 0.047                                   | 0.005 | 0.115                                  | 0.013 | 0.018                                  | 4E-04 | 0.006                                   | 3E-04 | 2.1   | 51                                      | 229               | 110                                    | 11 | 113                                    | 3                | 113                                     | 6   | -2.654867                                  | -121.5686                                  | 113  | 3   |
| O3-164 | 0.051                                   | 0.005 | 0.127                                  | 0.011 | 0.018                                  | 4E-04 | 0.005                                   | 2E-04 | 1.15  | 256                                     | 157               | 121                                    | 10 | 115                                    | 2                | 102                                     | 4   | 5.217391                                   | 55.07813                                   | 115  | 2   |
| O3-144 | 0.053                                   | 0.006 | 0.137                                  | 0.015 | 0.019                                  | 5E-04 | 0.006                                   | 3E-04 | 1.53  | 331                                     | 195               | 130                                    | 13 | 120                                    | 3                | 125                                     | 6   | 8.333333                                   | 63.74622                                   | 120  | 3   |
| O3-26  | 0.05                                    | 0.001 | 0.132                                  | 0.003 | 0.019                                  | 2E-04 | 0.005                                   | 8E-05 | 1.22  | 207                                     | 38                | 126                                    | 3  | 122                                    | 2                | 110                                     | 2   | 3.278689                                   | 41.0628                                    | 122  | 2   |
| O3-186 | 0.051                                   | 0.002 | 0.145                                  | 0.005 | 0.02                                   | 3E-04 | 0.005                                   | 2E-04 | 4.94  | 252                                     | 57                | 137                                    | 5  | 131                                    | 2                | 102                                     | 3   | 4.580153                                   | 48.01587                                   | 131  | 2   |
| O3-54  | 0.054                                   | 0.002 | 0.153                                  | 0.005 | 0.021                                  | 2E-04 | 0.004                                   | 8E-05 | 1.28  | 351                                     | 53                | 144                                    | 4  | 132                                    | 2                | 79                                      | 2   | 9.090909                                   | 62.39316                                   | 132  | 2   |
| O3-115 | 0.051                                   | 0.002 | 0.152                                  | 0.006 | 0.022                                  | 3E-04 | 0.007                                   | 9E-05 | 8.21  | 246                                     | 105               | 144                                    | 6  | 138                                    | 2                | 137                                     | 2   | 4.347826                                   | 43.90244                                   | 138  | 2   |
| O3-146 | 0.049                                   | 0.004 | 0.148                                  | 0.011 | 0.022                                  | 4E-04 | 0.007                                   | 8E-04 | 14.17 | 139                                     | 168               | 140                                    | 9  | 140                                    | 2                | 140                                     | 16  | 0                                          | -0.719424                                  | 140  | 2   |
| O3-51  | 0.05                                    | 0.003 | 0.155                                  | 0.008 | 0.022                                  | 3E-04 | 0.007                                   | 6E-05 | 1.3   | 190                                     | 127               | 146                                    | 7  | 143                                    | 2                | 143                                     | 1   | 2.097902                                   | 24.73684                                   | 143  | 2   |
| O3-85  | 0.053                                   | 0.002 | 0.181                                  | 0.007 | 0.025                                  | 3E-04 | 0.019                                   | 9E-04 | 33.48 | 340                                     | 59                | 169                                    | 6  | 157                                    | 2                | 376                                     | 18  | 7.643312                                   | 53.82353                                   | 157  | 2   |
| O3-75  | 0.056                                   | 0.002 | 0.198                                  | 0.006 | 0.025                                  | 3E-04 | 0.015                                   | 3E-04 | 2.33  | 469                                     | 48                | 183                                    | 5  | 162                                    | 2                | 299                                     | 5   | 12.96296                                   | 65.45842                                   | 162  | 2   |
| O3-136 | 0.05                                    | 1E-03 | 0.188                                  | 0.004 | 0.027                                  | 3E-04 | 0.009                                   | 2E-04 | 85.15 | 217                                     | 25                | 175                                    | 3  | 172                                    | 2                | 180                                     | 5   | 1.744186                                   | 20.73733                                   | 172  | 2   |
| O3-142 | 0.054                                   | 0.002 | 0.209                                  | 0.009 | 0.028                                  | 4E-04 | 0.013                                   | 3E-04 | 1.5   | 374                                     | 74                | 192                                    | 8  | 178                                    | 3                | 262                                     | 5   | 7.865169                                   | 52.40642                                   | 178  | 3   |
| O3-32  | 0.05                                    | 0.002 | 0.192                                  | 0.006 | 0.028                                  | 3E-04 | 0.009                                   | 2E-04 | 20.27 | 176                                     | 81                | 178                                    | 5  | 179                                    | 2                | 179                                     | 5   | -0.558659                                  | -1.704545                                  | 179  | 2   |
| O3-181 | 0.053                                   | 0.003 | 0.207                                  | 0.013 | 0.028                                  | 5E-04 | 0.008                                   | 3E-04 | 1.73  | 330                                     | 105               | 191                                    | 11 | 180                                    | 3                | 164                                     | 5   | 6.111111                                   | 45.45455                                   | 180  | 3   |
| O3-174 | 0.05                                    | 0.001 | 0.199                                  | 0.005 | 0.029                                  | 4E-04 | 0.006                                   | 9E-05 | 0.88  | 203                                     | 33                | 184                                    | 4  | 183                                    | 2                | 118                                     | 2   | 0.546448                                   | 9.852217                                   | 183  | 2   |
| O3-77  | 0.05                                    | 0.002 | 0.204                                  | 0.008 | 0.03                                   | 4E-04 | 0.009                                   | 1E-04 | 9.72  | 198                                     | 92                | 189                                    | 6  | 188                                    | 2                | 188                                     | 2   | 0.531915                                   | 5.050505                                   | 188  | 2   |
| O2-68  | 0.055                                   | 0.002 | 0.242                                  | 0.007 | 0.032                                  | 4E-04 | 0.01                                    | 1E-04 | 5.61  | 402                                     | 74                | 220                                    | 6  | 203                                    | 2                | 201                                     | 2   | 8.374384                                   | 49.50249                                   | 203  | 2   |
| O3-169 | 0.055                                   | 0.002 | 0.255                                  | 0.009 | 0.034                                  | 5E-04 | 0.022                                   | 4E-04 | 3.46  | 416                                     | 50                | 231                                    | 7  | 213                                    | 3                | 439                                     | 9   | 8.450704                                   | 48.79808                                   | 213  | 3   |
| O3-168 | 0.059                                   | 0.004 | 0.283                                  | 0.017 | 0.035                                  | 7E-04 | 0.009                                   | 3E-04 | 1.08  | 565                                     | 99                | 253                                    | 13 | 221                                    | 4                | 182                                     | 5   | 14.47964                                   | 60.88496                                   | 221  | 4   |
| O3-182 | 0.055                                   | 0.001 | 0.276                                  | 0.008 | 0.036                                  | 5E-04 | 0.01                                    | 2E-04 | 0.85  | 415                                     | 38                | 248                                    | 6  | 230                                    | 3                | 200                                     | 3   | 7.826087                                   | 44.57831                                   | 230  | 3   |
| O3-123 | 0.058                                   | 0.001 | 0.297                                  | 0.007 | 0.037                                  | 5E-04 | 0.01                                    | 1E-04 | 0.95  | 524                                     | 33                | 264                                    | 6  | 236                                    | 3                | 206                                     | 3   | 11.86441                                   | 54.96183                                   | 236  | 3   |
| O3-130 | 0.054                                   | 0.002 | 0.281                                  | 0.008 | 0.038                                  | 5E-04 | 0.009                                   | 3E-04 | 8.96  | 363                                     | 41                | 252                                    | 6  | 240                                    | 3                | 175                                     | 5   | 5                                          | 33.8843                                    | 240  | 3   |
| O3-190 | 0.053                                   | 0.002 | 0.286                                  | 0.008 | 0.039                                  | 5E-04 | 0.012                                   | 2E-04 | 29.94 | 327                                     | 69                | 255                                    | 6  | 247                                    | 3                | 246                                     | 3   | 3.238866                                   | 24.46483                                   | 247  | 3   |
| O3-175 | 0.05                                    | 0.001 | 0.274                                  | 0.006 | 0.04                                   | 5E-04 | 0.018                                   | 5E-04 | 36.93 | 178                                     | 29                | 246                                    | 5  | 253                                    | 3                | 370                                     | 10  | -2.766798                                  | -42.13483                                  | 253  | 3   |
| O3-24  | 0.059                                   | 0.002 | 0.334                                  | 0.009 | 0.041                                  | 5E-04 | 0.028                                   | 5E-04 | 6.24  | 568                                     | 34                | 293                                    | 7  | 259                                    | 3                | 562                                     | 10  | 13.12741                                   | 54.40141                                   | 259  | 3   |
| O3-12  | 0.057                                   | 0.004 | 0.335                                  | 0.02  | 0.043                                  | 7E-04 | 0.013                                   | 2E-04 | 3.44  | 499                                     | 142               | 294                                    | 15 | 268                                    | 5                | 265                                     | 4   | 9.701493                                   | 46.29259                                   | 268  | 5   |
| O3-99  | 0.051                                   | 0.002 | 0.313                                  | 0.012 | 0.044                                  | 6E-04 | 0.014                                   | 2E-04 | 14.56 | 254                                     | 92                | 276                                    | 9  | 279                                    | 3                | 279                                     | 4   | -1.075269                                  | -9.84252                                   | 279  | 3   |
| O3-23  | 0.053                                   | 0.002 | 0.324                                  | 0.012 | 0.044                                  | 6E-04 | 0.014                                   | 2E-04 | 8.38  | 324                                     | 95                | 285                                    | 10 | 281                                    | 4                | 280                                     | 4   | 1.423488                                   | 13.2716                                    | 281  | 4   |
| O3-76  | 0.051                                   | 0.006 | 0.34                                   | 0.04  | 0.048                                  | 1E-03 | 0.015                                   | 3E-04 | 1.23  | 242                                     | 270               | 297                                    | 30 | 304                                    | 6                | 305                                     | 6   | -2.302632                                  | -25.61983                                  | 304  | 6   |
| O3-166 | 0.058                                   | 0.001 | 0.538                                  | 0.013 | 0.067                                  | 9E-04 | 0.02                                    | 4E-04 | 6.31  | 548                                     | 30                | 437                                    | 9  | 416                                    | 5                | 406                                     | 8   | 5.048077                                   | 24.08759                                   | 416  | 5   |
| O3-112 | 0.059                                   | 0.001 | 0.625                                  | 0.012 | 0.076                                  | 9E-04 | 0.022                                   | 3E-04 | 4.61  | 582                                     | 23                | 493                                    | 8  | 474                                    | 5                | 443                                     | 7   | 4.008439                                   | 18.5567                                    | 474  | 5   |
| O3-79  | 0.057                                   | 0.002 | 0.6                                    | 0.015 | 0.077                                  | 9E-04 | 0.024                                   | 3E-04 | 26.2  | 480                                     | 63                | 477                                    | 10 | 476                                    | 5                | 476                                     | 6   | 0.210084                                   | 0.833333                                   | 476  | 5   |
| O3-150 | 0.066                                   | 0.002 | 0.694                                  | 0.016 | 0.077                                  | 1E-03 | 0.024                                   | 4E-04 | 1.52  | 797                                     | 28                | 535                                    | 10 | 476                                    | 6                | 472                                     | 8   | 12.39496                                   | 40.27604                                   | 476  | 6   |
| O3-27  | 0.057                                   | 0.002 | 0.616                                  | 0.021 | 0.079                                  | 0.001 | 0.025                                   | 3E-04 | 16.44 | 474                                     | 83                | 487                                    | 13 | 490                                    | 6                | 490                                     | 7   | -0.612245                                  | -3.375527                                  | 490  | 6   |
| O3-162 | 0.058                                   | 0.001 | 0.634                                  | 0.013 | 0.079                                  | 0.001 | 0.019                                   | 3E-04 | 4.66  | 528                                     | 25                | 499                                    | 8  | 492                                    | 6                | 382                                     | 7   | 1.422764                                   | 6.818182                                   | 492  | 6   |
| O3-140 | 0.066                                   | 0.003 | 0.739                                  | 0.028 | 0.081                                  | 0.001 | 0.023                                   | 5E-04 | 0.7   | 808                                     | 56                | 562                                    | 17 | 503                                    | 7                | 465                                     | 9   | 11.72962                                   | 37.74752                                   | 503  | 7   |
| O3-165 | 0.058                                   | 0.001 | 0.653                                  | 0.014 | 0.081                                  | 0.001 | 0.025                                   | 3E-04 | 14.35 | 536                                     | 57                | 510                                    | 9  | 504                                    | 6                | 503                                     | 6   | 1.190476                                   | 5.970149                                   | 504  | 6   |
| O3-59  | 0.07                                    | 0.001 | 0.798                                  | 0.014 | 0.083                                  | 8E-04 | 0.015                                   | 2E-04 | 3.39  | 916                                     | 20                | 596                                    | 8  | 515                                    | 5                | 308                                     | 4   | 15.72816                                   | 43.77729                                   | 515  | 5   |
| O3-36  | 0.068                                   | 0.001 | 0.828                                  | 0.012 | 0.088                                  | 9E-04 | 0.018                                   | 2E-04 | 8.3   | 877                                     | 15                | 612                                    | 7  | 543                                    | 5                | 363                                     | 5   | 12.70718                                   | 38.08438                                   | 543  | 5   |
| O3-74  | 0.058                                   | 0.002 | 0.716                                  | 0.018 | 0.089                                  | 0.001 | 0.026                                   | 4E-04 | 0.67  | 537                                     | 35                | 548                                    | 11 | 551                                    | 6                | 510                                     | 7   | -0.544465                                  | -2.607076                                  | 551  | 6   |
| O3-119 | 0.062                                   | 0.002 | 0.778                                  | 0.023 | 0.091                                  | 0.001 | 0.024                                   | 5E-04 | 1.87  | 681                                     | 40                | 584                                    | 13 |                                        |                  |                                         |     |                                            |                                            |      |     |

|        |       |       |       |       |       |       |       |       |       |      |    |      |    |      |    |      |    |           |           |      |    |
|--------|-------|-------|-------|-------|-------|-------|-------|-------|-------|------|----|------|----|------|----|------|----|-----------|-----------|------|----|
| O3-137 | 0.081 | 0.002 | 1.853 | 0.041 | 0.166 | 0.002 | 0.036 | 6E-04 | 0.93  | 1215 | 24 | 1064 | 14 | 992  | 12 | 715  | 11 | 7.258065  | 18.35391  | 992  | 12 |
| O2-66  | 0.074 | 0.001 | 1.835 | 0.032 | 0.18  | 0.002 | 0.05  | 7E-04 | 2.6   | 1038 | 19 | 1058 | 11 | 1068 | 10 | 995  | 13 | -0.93633  | -2.890173 | 1038 | 19 |
| O3-09  | 0.077 | 0.001 | 1.946 | 0.033 | 0.184 | 0.002 | 0.045 | 6E-04 | 1.48  | 1116 | 16 | 1097 | 11 | 1087 | 13 | 895  | 11 | 0.919963  | 2.598566  | 1116 | 16 |
| O3-179 | 0.078 | 0.002 | 1.878 | 0.043 | 0.174 | 0.002 | 0.006 | 2E-04 | 2.8   | 1159 | 25 | 1074 | 15 | 1032 | 13 | 116  | 3  | 4.069767  | 10.95772  | 1159 | 25 |
| O3-02  | 0.084 | 0.001 | 2.249 | 0.039 | 0.193 | 0.003 | 0.046 | 5E-04 | 1.02  | 1303 | 16 | 1197 | 12 | 1138 | 14 | 902  | 10 | 5.184534  | 12.66309  | 1303 | 16 |
| O3-04  | 0.087 | 0.001 | 2.863 | 0.042 | 0.24  | 0.003 | 0.018 | 3E-04 | 5.88  | 1352 | 13 | 1372 | 11 | 1385 | 16 | 369  | 5  | -0.938628 | -2.440828 | 1352 | 13 |
| O3-170 | 0.089 | 0.003 | 2.117 | 0.08  | 0.172 | 0.003 | 0.038 | 9E-04 | 1.07  | 1406 | 47 | 1154 | 26 | 1025 | 15 | 744  | 18 | 12.58537  | 27.09815  | 1406 | 47 |
| O3-111 | 0.089 | 0.002 | 2.553 | 0.051 | 0.207 | 0.002 | 0.053 | 8E-04 | 2.37  | 1413 | 21 | 1287 | 15 | 1214 | 13 | 1052 | 16 | 6.01318   | 14.08351  | 1413 | 21 |
| O3-53  | 0.091 | 0.002 | 2.202 | 0.034 | 0.176 | 0.002 | 0.043 | 5E-04 | 1.45  | 1445 | 16 | 1182 | 11 | 1043 | 9  | 860  | 10 | 13.32694  | 27.82007  | 1445 | 16 |
| O3-135 | 0.092 | 0.002 | 2.166 | 0.043 | 0.17  | 0.002 | 0.043 | 6E-04 | 2.24  | 1474 | 20 | 1170 | 14 | 1013 | 12 | 850  | 12 | 15.49852  | 31.27544  | 1474 | 20 |
| O3-31  | 0.093 | 0.002 | 2.161 | 0.035 | 0.168 | 0.002 | 0.022 | 5E-04 | 12.34 | 1496 | 15 | 1168 | 11 | 1000 | 10 | 432  | 11 | 16.8      | 33.15508  | 1496 | 15 |
| O3-155 | 0.095 | 0.002 | 2.988 | 0.06  | 0.227 | 0.003 | 0.069 | 0.001 | 2.4   | 1536 | 20 | 1405 | 15 | 1320 | 15 | 1351 | 20 | 6.439394  | 14.0625   | 1536 | 20 |
| O3-113 | 0.099 | 0.002 | 3.332 | 0.057 | 0.245 | 0.003 | 0.042 | 5E-04 | 3.83  | 1599 | 16 | 1489 | 13 | 1412 | 15 | 829  | 10 | 5.453258  | 11.69481  | 1599 | 16 |
| O3-100 | 0.1   | 0.002 | 3.534 | 0.068 | 0.255 | 0.003 | 0.063 | 9E-04 | 0.97  | 1631 | 20 | 1535 | 15 | 1466 | 15 | 1236 | 17 | 4.706685  | 10.11649  | 1631 | 20 |
| O3-20  | 0.103 | 0.002 | 3.528 | 0.068 | 0.249 | 0.003 | 0.073 | 0.001 | 11.19 | 1672 | 43 | 1534 | 15 | 1435 | 16 | 1417 | 20 | 6.898955  | 14.17464  | 1672 | 43 |
| O3-102 | 0.106 | 0.002 | 4.63  | 0.075 | 0.317 | 0.004 | 0.083 | 0.001 | 1.54  | 1732 | 15 | 1755 | 13 | 1774 | 17 | 1619 | 19 | -1.071026 | -2.424942 | 1732 | 15 |
| O2-65  | 0.107 | 0.002 | 4.008 | 0.068 | 0.272 | 0.003 | 0.063 | 8E-04 | 1.23  | 1746 | 17 | 1636 | 14 | 1552 | 14 | 1229 | 15 | 5.412371  | 11.11111  | 1746 | 17 |
| O3-110 | 0.109 | 0.002 | 4.393 | 0.087 | 0.292 | 0.003 | 0.081 | 0.001 | 2.59  | 1786 | 20 | 1711 | 16 | 1650 | 17 | 1576 | 23 | 3.69697   | 7.614782  | 1786 | 20 |
| O2-62  | 0.11  | 0.002 | 4.34  | 0.067 | 0.285 | 0.003 | 0.074 | 1E-03 | 2.46  | 1805 | 14 | 1701 | 13 | 1618 | 14 | 1434 | 18 | 5.12979   | 10.36011  | 1805 | 14 |
| O3-114 | 0.114 | 0.002 | 4.753 | 0.094 | 0.304 | 0.004 | 0.084 | 0.001 | 1.65  | 1857 | 19 | 1777 | 17 | 1709 | 18 | 1628 | 23 | 3.978935  | 7.969844  | 1857 | 19 |
| O3-78  | 0.123 | 0.004 | 5.816 | 0.156 | 0.343 | 0.004 | 0.098 | 0.001 | 1.66  | 2002 | 53 | 1949 | 23 | 1900 | 20 | 1889 | 20 | 2.578947  | 5.094905  | 2002 | 53 |
| O3-25  | 0.125 | 0.002 | 5.433 | 0.088 | 0.314 | 0.004 | 0.056 | 8E-04 | 3.88  | 2033 | 14 | 1890 | 14 | 1762 | 18 | 1103 | 16 | 7.264472  | 13.33005  | 2033 | 14 |
| O3-01  | 0.144 | 0.005 | 7.25  | 0.217 | 0.366 | 0.006 | 0.103 | 0.001 | 0.89  | 2271 | 59 | 2143 | 27 | 2012 | 26 | 1984 | 27 | 6.510934  | 11.40467  | 2271 | 59 |
| O3-177 | 0.159 | 0.003 | 9.026 | 0.188 | 0.411 | 0.005 | 0.092 | 0.002 | 1.46  | 2448 | 18 | 2341 | 19 | 2219 | 25 | 1786 | 28 | 5.497972  | 9.354575  | 2448 | 18 |
| O3-17  | 0.16  | 0.003 | 10.46 | 0.171 | 0.473 | 0.006 | 0.115 | 0.001 | 1.6   | 2460 | 13 | 2476 | 15 | 2496 | 26 | 2195 | 27 | -0.801282 | -1.463415 | 2460 | 13 |
| O3-81  | 0.161 | 0.002 | 9.996 | 0.15  | 0.45  | 0.005 | 0.115 | 0.001 | 4.55  | 2468 | 12 | 2434 | 14 | 2394 | 21 | 2203 | 25 | 1.670844  | 2.998379  | 2468 | 12 |
| O3-98  | 0.162 | 0.003 | 10.07 | 0.181 | 0.451 | 0.005 | 0.109 | 0.002 | 1.52  | 2478 | 16 | 2442 | 17 | 2398 | 23 | 2090 | 27 | 1.834862  | 3.22841   | 2478 | 16 |
| O3-86  | 0.162 | 0.003 | 9.319 | 0.165 | 0.416 | 0.005 | 0.115 | 0.002 | 0.93  | 2481 | 16 | 2370 | 16 | 2243 | 21 | 2194 | 27 | 5.66206   | 9.592906  | 2481 | 16 |
| O3-148 | 0.163 | 0.003 | 9.293 | 0.18  | 0.414 | 0.005 | 0.105 | 0.002 | 1.16  | 2487 | 17 | 2367 | 18 | 2231 | 23 | 2021 | 28 | 6.095921  | 10.29353  | 2487 | 17 |
| O3-52  | 0.172 | 0.003 | 10.29 | 0.148 | 0.433 | 0.004 | 0.118 | 0.002 | 3.91  | 2579 | 12 | 2461 | 13 | 2321 | 19 | 2253 | 28 | 6.031883  | 10.00388  | 2579 | 12 |

Table DR11 Raw data of zircon U-Pb ages of sample 731C-11W-1W

| Grain    | Apparent Ages (Ma)                |       |                                  |       |                                  |       |                                   |       |       | Corr.% discordant                 |     |                                  |    |                                  |     |                                   |     |                           | Best Age<br>(Ma)          | 1σ   |     |
|----------|-----------------------------------|-------|----------------------------------|-------|----------------------------------|-------|-----------------------------------|-------|-------|-----------------------------------|-----|----------------------------------|----|----------------------------------|-----|-----------------------------------|-----|---------------------------|---------------------------|------|-----|
|          | $^{207}\text{Pb}/^{206}\text{Pb}$ | 1σ    | $^{207}\text{Pb}/^{235}\text{U}$ | 1σ    | $^{206}\text{Pb}/^{238}\text{U}$ | 1σ    | $^{208}\text{Pb}/^{232}\text{Th}$ | 1σ    | U/Th  | $^{207}\text{Pb}/^{206}\text{Pb}$ | 1σ  | $^{207}\text{Pb}/^{235}\text{U}$ | 1σ | $^{206}\text{Pb}/^{238}\text{U}$ | 1σ  | $^{208}\text{Pb}/^{232}\text{Th}$ | 1σ  | $\frac{206/238}{207/235}$ | $\frac{207/206}{206/238}$ |      |     |
|          |                                   |       |                                  |       |                                  |       |                                   |       |       |                                   |     |                                  |    |                                  |     |                                   |     |                           |                           |      |     |
| O4-2-39  | 0.05                              | 0.005 | 0.041                            | 0.004 | 0.006                            | 2E-04 | 0.016                             | 0.003 | 138.7 | 207                               | 173 | 41                               | 4  | 38.2                             | 1   | 330                               | 50  | 7.329843                  | 81.54589                  | 38.2 | 1   |
| O4-2-84  | 0.051                             | 0.006 | 0.049                            | 0.005 | 0.007                            | 1E-04 | 0.002                             | 3E-05 | 0.69  | 252                               | 246 | 49                               | 5  | 44.5                             | 0.9 | 44                                | 0.6 | 10.11236                  | 82.34127                  | 44.5 | 0.9 |
| O4-2-200 | 0.051                             | 0.005 | 0.05                             | 0.004 | 0.007                            | 2E-04 | 0.002                             | 7E-05 | 0.99  | 259                               | 158 | 49                               | 4  | 45                               | 1   | 46                                | 1   | 8.888889                  | 82.62548                  | 45   | 1   |
| O4-2-85  | 0.051                             | 0.008 | 0.054                            | 0.008 | 0.008                            | 3E-04 | 0.002                             | 1E-04 | 0.74  | 238                               | 260 | 53                               | 8  | 49                               | 2   | 48                                | 2   | 8.163265                  | 79.41176                  | 49   | 2   |
| O4-2-164 | 0.05                              | 0.009 | 0.058                            | 0.01  | 0.008                            | 3E-04 | 0.003                             | 2E-04 | 1.12  | 183                               | 287 | 57                               | 10 | 54                               | 2   | 54                                | 3   | 5.555556                  | 70.4918                   | 54   | 2   |
| O4-2-103 | 0.051                             | 0.002 | 0.064                            | 0.003 | 0.009                            | 1E-04 | 0.003                             | 6E-05 | 1.99  | 240                               | 62  | 63                               | 2  | 58.6                             | 0.9 | 57                                | 1   | 7.508532                  | 75.58333                  | 58.6 | 0.9 |
| O4-2-175 | 0.049                             | 0.001 | 0.066                            | 0.002 | 0.01                             | 1E-04 | 0.003                             | 4E-05 | 0.39  | 169                               | 37  | 65                               | 2  | 62                               | 0.8 | 56.5                              | 0.8 | 4.83871                   | 63.31361                  | 62   | 0.8 |
| O4-2-132 | 0.052                             | 0.004 | 0.072                            | 0.005 | 0.01                             | 2E-04 | 0.003                             | 9E-05 | 1.12  | 266                               | 131 | 70                               | 5  | 65                               | 1   | 63                                | 2   | 7.692308                  | 75.56391                  | 65   | 1   |
| O4-2-165 | 0.051                             | 0.002 | 0.073                            | 0.003 | 0.01                             | 2E-04 | 0.003                             | 6E-05 | 2.22  | 263                               | 55  | 71                               | 2  | 65.8                             | 1   | 59                                | 1   | 7.902736                  | 74.98099                  | 65.8 | 1   |
| O4-2-114 | 0.049                             | 0.001 | 0.072                            | 0.002 | 0.011                            | 2E-04 | 0.003                             | 5E-05 | 1.99  | 154                               | 39  | 70                               | 2  | 67.8                             | 1   | 64                                | 1   | 3.244838                  | 55.97403                  | 67.8 | 1   |
| O4-2-117 | 0.046                             | 0.015 | 0.067                            | 0.021 | 0.011                            | 3E-04 | 0.005                             | 0.003 | 6.58  |                                   | 521 | 66                               | 20 | 68                               | 2   | 100                               | 61  | -2.941176                 | \                         | 68   | 2   |
| O4-2-106 | 0.049                             | 1E-03 | 0.072                            | 0.002 | 0.011                            | 1E-04 | 0.003                             | 5E-05 | 4.15  | 148                               | 26  | 71                               | 1  | 68.4                             | 0.9 | 66                                | 1   | 3.80117                   | 53.78378                  | 68.4 | 0.9 |
| O4-2-131 | 0.046                             | 0.003 | 0.069                            | 0.004 | 0.011                            | 3E-04 | 0.004                             | 3E-04 | 2.02  |                                   | 145 | 68                               | 4  | 70                               | 2   | 76                                | 5   | -2.857143                 | \                         | 70   | 2   |
| O4-2-73  | 0.05                              | 0.001 | 0.076                            | 0.002 | 0.011                            | 2E-04 | 0.003                             | 5E-05 | 2.58  | 199                               | 33  | 74                               | 2  | 70.5                             | 1   | 66                                | 1   | 4.964539                  | 64.57286                  | 70.5 | 1   |
| O4-2-46  | 0.049                             | 0.002 | 0.076                            | 0.003 | 0.011                            | 2E-04 | 0.003                             | 5E-05 | 0.96  | 159                               | 63  | 74                               | 3  | 71                               | 1   | 61                                | 1   | 4.225352                  | 55.34591                  | 71   | 1   |
| O4-2-87  | 0.054                             | 0.002 | 0.082                            | 0.003 | 0.011                            | 2E-04 | 0.003                             | 6E-05 | 1.46  | 357                               | 53  | 80                               | 3  | 71                               | 1   | 70                                | 1   | 12.67606                  | 80.11204                  | 71   | 1   |
| O4-2-20  | 0.046                             | 0.005 | 0.072                            | 0.008 | 0.011                            | 3E-04 | 0.004                             | 3E-04 | 2.02  |                                   | 222 | 71                               | 7  | 73                               | 2   | 78                                | 7   | -2.739726                 | \                         | 73   | 2   |
| O4-2-55  | 0.052                             | 0.002 | 0.082                            | 0.003 | 0.011                            | 2E-04 | 0.003                             | 6E-05 | 1.18  | 285                               | 55  | 80                               | 3  | 74                               | 1   | 67                                | 1   | 8.108108                  | 74.03509                  | 74   | 1   |
| O4-2-05  | 0.053                             | 0.006 | 0.086                            | 0.009 | 0.012                            | 3E-04 | 0.01                              | 0.002 | 32.98 | 325                               | 195 | 84                               | 9  | 76                               | 2   | 211                               | 31  | 10.52632                  | 76.61538                  | 76   | 2   |
| O4-2-113 | 0.05                              | 0.001 | 0.081                            | 0.002 | 0.012                            | 2E-04 | 0.004                             | 5E-05 | 2.23  | 190                               | 31  | 79                               | 2  | 76                               | 1   | 75                                | 1   | 3.947368                  | 60                        | 76   | 1   |
| O4-2-90  | 0.054                             | 0.006 | 0.089                            | 0.01  | 0.012                            | 3E-04 | 0.004                             | 6E-05 | 1.71  | 358                               | 248 | 87                               | 9  | 77                               | 2   | 76                                | 1   | 12.98701                  | 78.49162                  | 77   | 2   |
| O4-2-77  | 0.054                             | 0.007 | 0.095                            | 0.011 | 0.013                            | 4E-04 | 0.005                             | 3E-04 | 2.33  | 384                               | 214 | 92                               | 11 | 81                               | 2   | 92                                | 6   | 13.58025                  | 78.90625                  | 81   | 2   |
| O4-2-144 | 0.054                             | 0.006 | 0.094                            | 0.011 | 0.013                            | 4E-04 | 0.004                             | 2E-04 | 1.24  | 357                               | 207 | 91                               | 10 | 82                               | 2   | 79                                | 4   | 10.97561                  | 77.03081                  | 82   | 2   |
| O4-2-151 | 0.049                             | 0.001 | 0.089                            | 0.002 | 0.013                            | 2E-04 | 0.004                             | 5E-05 | 19.39 | 144                               | 57  | 87                               | 2  | 84.9                             | 1   | 84.7                              | 0.9 | 2.473498                  | 41.04167                  | 84.9 | 1   |
| O4-2-138 | 0.053                             | 0.009 | 0.098                            | 0.015 | 0.013                            | 5E-04 | 0.004                             | 3E-04 | 1.48  | 348                               | 282 | 95                               | 14 | 85                               | 3   | 79                                | 5   | 11.76471                  | 75.57471                  | 85   | 3   |
| O4-2-68  | 0.053                             | 0.005 | 0.098                            | 0.01  | 0.013                            | 4E-04 | 0.005                             | 3E-04 | 3.56  | 325                               | 173 | 95                               | 9  | 86                               | 2   | 104                               | 6   | 10.46512                  | 73.53846                  | 86   | 2   |
| O4-2-34  | 0.049                             | 0.004 | 0.091                            | 0.008 | 0.014                            | 3E-04 | 0.004                             | 1E-04 | 1.09  | 137                               | 145 | 89                               | 7  | 87                               | 2   | 84                                | 3   | 2.298851                  | 36.49635                  | 87   | 2   |
| O4-2-78  | 0.051                             | 0.002 | 0.096                            | 0.003 | 0.014                            | 2E-04 | 0.004                             | 7E-05 | 1.37  | 223                               | 52  | 93                               | 3  | 88                               | 1   | 82                                | 1   | 5.681818                  | 60.53812                  | 88   | 1   |
| O4-2-190 | 0.054                             | 0.001 | 0.102                            | 0.003 | 0.014                            | 2E-04 | 0.004                             | 7E-05 | 1.43  | 353                               | 38  | 99                               | 3  | 88                               | 1   | 83                                | 1   | 12.5                      | 75.07082                  | 88   | 1   |
| O4-2-172 | 0.053                             | 0.001 | 0.108                            | 0.003 | 0.015                            | 2E-04 | 0.004                             | 6E-05 | 0.87  | 331                               | 33  | 104                              | 2  | 95                               | 1   | 87                                | 1   | 9.473684                  | 71.29909                  | 95   | 1   |
| O4-2-49  | 0.054                             | 0.003 | 0.111                            | 0.007 | 0.015                            | 3E-04 | 0.004                             | 9E-05 | 0.68  | 358                               | 100 | 107                              | 6  | 96                               | 2   | 90                                | 2   | 11.45833                  | 73.18436                  | 96   | 2   |
| O4-2-86  | 0.05                              | 0.002 | 0.104                            | 0.004 | 0.015                            | 2E-04 | 0.005                             | 8E-05 | 1.15  | 214                               | 52  | 101                              | 3  | 96                               | 1   | 92                                | 2   | 5.208333                  | 55.14019                  | 96   | 1   |
| O4-2-57  | 0.051                             | 0.003 | 0.106                            | 0.006 | 0.015                            | 3E-04 | 0.007                             | 2E-04 | 1.73  | 238                               | 93  | 103                              | 5  | 97                               | 2   | 141                               | 3   | 6.185567                  | 59.2437                   | 97   | 2   |
| O4-2-112 | 0.054                             | 0.002 | 0.114                            | 0.004 | 0.015                            | 2E-04 | 0.005                             | 1E-04 | 2.39  | 381                               | 53  | 110                              | 4  | 98                               | 1   | 97                                | 2   | 12.2449                   | 74.27822                  | 98   | 1   |
| O4-2-69  | 0.046                             | 0.002 | 0.101                            | 0.003 | 0.016                            | 2E-04 | 0.032                             | 0.005 | 20.46 |                                   | 74  | 97                               | 3  | 101                              | 1   | 628                               | 90  | -3.960396                 | \                         | 101  | 1   |
| O4-2-142 | 0.049                             | 0.001 | 0.108                            | 0.002 | 0.016                            | 2E-04 | 0.005                             | 7E-05 | 1.6   | 167                               | 29  | 104                              | 2  | 101                              | 1   | 100                               | 1   | 2.970297                  | 39.52096                  | 101  | 1   |
| O4-2-03  | 0.054                             | 0.003 | 0.118                            | 0.006 | 0.016                            | 2E-04 | 0.005                             | 1E-04 | 1.87  | 356                               | 87  | 113                              | 5  | 102                              | 2   | 96                                | 3   | 10.78431                  | 71.34831                  | 102  | 2   |
| O4-2-155 | 0.052                             | 0.002 | 0.117                            | 0.005 | 0.016                            | 2E-04 | 0.005                             | 9E-05 | 1.17  | 293                               | 68  | 112                              | 4  | 104                              | 2   | 94                                | 2   | 7.692308                  | 64.50512                  | 104  | 2   |
| O4-2-29  | 0.048                             | 0.01  | 0.108                            | 0.022 | 0.016                            | 7E-04 | 0.008                             | 8E-04 | 3.45  | 95                                | 301 | 104                              | 20 | 105                              | 5   | 164                               | 17  | -0.952381                 | -10.52632                 | 105  | 5   |
| O4-2-53  | 0.048                             | 0.002 | 0.11                             | 0.004 | 0.017                            | 3E-04 | 0.005                             | 0.001 | 109.9 | 109                               | 97  | 106                              | 4  | 106                              | 2   | 106                               | 22  | 0                         | 2.752294                  | 106  | 2   |
| O4-2-154 | 0.053                             | 0.006 | 0.12                             | 0.012 | 0.017                            | 4E-04 | 0.004                             | 3E-04 | 2.36  | 313                               | 186 | 115                              | 11 | 106                              | 3   | 78                                | 5   | 8.490566                  | 66.13419                  | 106  | 3   |
| O4-2-24  | 0.051                             | 0.005 | 0.121                            | 0.011 | 0.017                            | 3E-04 | 0.005                             | 8E-05 | 1.32  | 236                               | 213 | 116                              | 10 | 110                              | 2   | 109                               | 2   | 5.454545                  | 53.38983                  | 110  | 2   |
| O4-2-19  | 0.051                             | 0.002 | 0.139                            | 0.006 | 0.02                             | 3E-04 | 0.006                             | 9E-05 | 30.06 | 236                               | 103 | 132                              | 5  | 126                              | 2   | 125                               | 2   | 4.761905                  | 46.61017                  | 126  | 2   |
| O4-2-71  | 0.051                             | 0.002 | 0.144                            | 0.007 | 0.021                            | 3E-04 | 0.007                             | 8E-05 | 4.2   | 220                               | 114 | 136                              | 6  | 132                              | 2   | 131                               | 2   | 3.030303                  | 40                        | 132  | 2   |
| O4-2-115 | 0.055                             | 0.001 | 0.155                            | 0.003 | 0.021                            | 3E-04 | 0.006                             | 9E-05 | 2.21  | 394                               | 27  | 147                              | 3  | 132                              | 2   | 130                               | 2   | 11.36364                  | 66.49746                  | 132  | 2   |
| O4-2-01  | 0.052                             | 0.002 | 0.153                            | 0.007 | 0.021                            | 3E-04 | 0.012                             | 5E-04 | 11.02 | 285                               | 78  | 145                              | 6  | 136                              | 2   | 235                               | 10  | 6.617647                  | 52.2807                   | 136  | 2   |
| O4-2-30  | 0.052                             | 0.002 | 0.157                            | 0.006 | 0.022                            | 3E-04 | 0.006                             | 1E-04 | 1.56  | 299                               | 63  | 148                              | 6  | 138                              | 2   | 129                               | 3   | 7.246377                  | 53.84615                  | 138  | 2   |
| O4-2-40  | 0.053                             | 0.002 | 0.162                            | 0.007 | 0.022                            | 4E-04 | 0.011                             | 4E-04 | 11.46 | 323                               | 72  | 153                              | 6  | 142                              | 2   | 213                               | 9   | 7.746479                  | 56.03715                  | 142  | 2   |
| O4-2-127 | 0.05                              | 0.002 | 0.155                            | 0.005 | 0.023                            | 3E-04 | 0.007                             | 9E-05 | 4.79  | 174                               | 87  | 147                              | 5  | 145                              | 2   | 145                               | 2   | 1.37931                   | 16.66667                  | 145  | 2   |
| O4-2-107 | 0.049                             | 0.001 | 0.158                            | 0.004 | 0.023                            | 3E-04 | 0.009                             | 2E-04 | 4.96  | 158                               | 33  | 149                              | 3  | 148                              | 2   | 171                               | 3   | 0.675676                  | 6.329114                  | 148  | 2   |
| O4-2-193 | 0.054                             | 0.002 | 0.175                            | 0.006 | 0.023                            | 3E-04 | 0.007                             | 1E-04 | 0.9   | 379                               | 53  | 164                              | 5  | 149                              | 2   | 132                               | 2   | 10.06711                  | 60.68602                  | 149  | 2   |
| O4-2-04  | 0.05                              | 0.001 | 0.161                            | 0.004 | 0.023                            | 3E-04 | 0.007                             | 1E-04 | 48.65 | 186                               | 65  | 152                              | 4  | 150                              | 2   | 149                               | 2   | 1.333333                  | 19.35484                  | 150  | 2   |
| O4-2-36  | 0.051                             | 0.003 | 0.171                            | 0.01  | 0.024                            | 4E-04 | 0.024                             | 0.001 | 20.23 | 244                               | 101 | 160                              | 9  | 154                              | 3   | 487                               | 25  | 3.896104                  | 36.88525                  | 154  | 3   |
| O4-2-27  | 0.051                             | 0.005 | 0.173                            | 0.017 | 0.024                            | 5E-04 | 0.008                             | 1E-04 | 1.7   | 252                               | 228 | 162                              | 15 | 156                              | 3   | 155                               | 3   | 3.846154                  | 38.09524                  | 156  | 3   |
| O4-2-197 | 0.05                              | 0.001 | 0.179                            | 0.004 | 0.026                            | 3E-04 | 0.008                             | 9E-05 | 12.11 | 202                               | 64  | 168                              | 4  | 165                              | 2   | 165                               | 2   | 1.818182                  | 18.31683                  | 165  | 2   |
| O4-2-70  | 0.053                             | 0.002 | 0.191                            | 0.006 | 0.026                            | 4E-04 | 0.01                              | 3E-04 | 5.82  | 317                               | 50  | 178                              | 5  | 167                              | 2   | 204                               | 5   | 6.586826                  | 47.31861                  | 167  | 2   |
| O4-2-59  | 0.055                             | 0.003 | 0.205                            | 0.012 | 0.027                            | 5E-04 | 0.008                             | 2E-04 | 16.5  | 432                               | 138 | 189                              | 10 | 170                              | 3   | 168                               | 4   | 11.17647                  | 60.64815                  | 170  | 3   |
| O4-2-110 | 0.051                             | 0.001 | 0.191                            | 0.005 | 0.027                            | 4E-04 | 0.01                              | 2E-04 | 8.81  | 225                               | 30  | 177                              | 4  | 174                              | 2   | 198                               | 4   | 1.724138                  | 22.66667                  | 174  | 2   |
| O4-2-198 | 0.052                             | 0.001 | 0.197                            | 0.004 | 0.0                              |       |                                   |       |       |                                   |     |                                  |    |                                  |     |                                   |     |                           |                           |      |     |

|          |       |       |       |       |       |       |       |       |       |      |     |      |    |      |    |      |    |          |          |      |    |
|----------|-------|-------|-------|-------|-------|-------|-------|-------|-------|------|-----|------|----|------|----|------|----|----------|----------|------|----|
| O4-2-171 | 0.065 | 0.002 | 0.965 | 0.025 | 0.107 | 0.001 | 0.033 | 4E-04 | 3.19  | 779  | 62  | 686  | 13 | 658  | 8  | 654  | 8  | 4.255319 | 15.53273 | 658  | 8  |
| O4-2-58  | 0.062 | 0.003 | 0.922 | 0.042 | 0.108 | 0.002 | 0.033 | 4E-04 | 1.78  | 672  | 105 | 664  | 22 | 661  | 9  | 661  | 8  | 0.453858 | 1.636905 | 661  | 9  |
| O4-2-141 | 0.069 | 0.002 | 1.033 | 0.024 | 0.109 | 0.001 | 0.027 | 4E-04 | 1.55  | 893  | 26  | 720  | 12 | 666  | 9  | 545  | 8  | 8.108108 | 25.41993 | 666  | 9  |
| O4-2-94  | 0.073 | 0.001 | 1.193 | 0.02  | 0.118 | 0.002 | 0.033 | 4E-04 | 5.77  | 1023 | 15  | 797  | 9  | 719  | 9  | 649  | 9  | 10.8484  | 29.71652 | 719  | 9  |
| O4-2-173 | 0.068 | 0.001 | 1.109 | 0.018 | 0.118 | 0.001 | 0.033 | 5E-04 | 9.04  | 870  | 16  | 758  | 9  | 720  | 8  | 657  | 9  | 5.277778 | 17.24138 | 720  | 8  |
| O4-2-101 | 0.067 | 0.001 | 1.104 | 0.019 | 0.119 | 0.002 | 0.032 | 4E-04 | 1.34  | 847  | 16  | 755  | 9  | 725  | 9  | 635  | 8  | 4.137931 | 14.40378 | 725  | 9  |
| O4-2-10  | 0.068 | 0.002 | 1.118 | 0.026 | 0.119 | 0.001 | 0.036 | 5E-04 | 1.3   | 866  | 29  | 762  | 12 | 727  | 8  | 714  | 10 | 4.814305 | 16.05081 | 727  | 8  |
| O4-2-149 | 0.074 | 0.002 | 1.263 | 0.027 | 0.123 | 0.002 | 0.038 | 6E-04 | 0.98  | 1049 | 23  | 829  | 12 | 749  | 9  | 758  | 11 | 10.68091 | 28.59867 | 749  | 9  |
| O4-2-88  | 0.071 | 0.001 | 1.222 | 0.024 | 0.125 | 0.002 | 0.034 | 5E-04 | 3.65  | 958  | 20  | 811  | 11 | 758  | 10 | 684  | 10 | 6.992084 | 20.87683 | 758  | 10 |
| O4-2-109 | 0.068 | 0.001 | 1.167 | 0.022 | 0.125 | 0.002 | 0.034 | 5E-04 | 1.79  | 858  | 19  | 785  | 10 | 760  | 10 | 683  | 9  | 3.289474 | 11.42191 | 760  | 10 |
| O4-2-136 | 0.069 | 0.002 | 1.221 | 0.04  | 0.129 | 0.002 | 0.039 | 5E-04 | 1.94  | 888  | 76  | 810  | 18 | 782  | 11 | 778  | 10 | 3.580563 | 11.93694 | 782  | 11 |
| O4-2-93  | 0.068 | 0.002 | 1.219 | 0.038 | 0.129 | 0.002 | 0.039 | 5E-04 | 2.21  | 877  | 73  | 809  | 18 | 785  | 11 | 781  | 10 | 3.057325 | 10.49031 | 785  | 11 |
| O4-2-72  | 0.071 | 0.001 | 1.275 | 0.024 | 0.131 | 0.002 | 0.041 | 5E-04 | 1.14  | 944  | 19  | 835  | 11 | 794  | 10 | 804  | 10 | 5.163728 | 15.88983 | 794  | 10 |
| O4-2-185 | 0.074 | 0.002 | 1.344 | 0.028 | 0.132 | 0.002 | 0.035 | 5E-04 | 1.66  | 1037 | 23  | 865  | 12 | 799  | 9  | 697  | 11 | 8.260325 | 22.95082 | 799  | 9  |
| O4-2-61  | 0.075 | 0.002 | 1.365 | 0.034 | 0.132 | 0.002 | 0.031 | 5E-04 | 1.87  | 1063 | 28  | 874  | 15 | 801  | 11 | 617  | 10 | 9.113608 | 24.64722 | 801  | 11 |
| O4-2-67  | 0.073 | 0.001 | 1.358 | 0.025 | 0.135 | 0.002 | 0.026 | 4E-04 | 3     | 1015 | 18  | 871  | 11 | 815  | 10 | 523  | 7  | 6.871166 | 19.70443 | 815  | 10 |
| O4-2-170 | 0.073 | 0.002 | 1.383 | 0.037 | 0.138 | 0.002 | 0.042 | 5E-04 | 3.06  | 1001 | 62  | 882  | 16 | 835  | 10 | 827  | 10 | 5.628743 | 16.58342 | 835  | 10 |
| O4-2-108 | 0.075 | 0.001 | 1.449 | 0.026 | 0.141 | 0.002 | 0.043 | 6E-04 | 1.16  | 1058 | 18  | 909  | 11 | 849  | 11 | 845  | 11 | 7.067138 | 19.75425 | 849  | 11 |
| O4-2-97  | 0.07  | 0.001 | 1.382 | 0.024 | 0.143 | 0.002 | 0.039 | 5E-04 | 4.58  | 933  | 16  | 881  | 10 | 861  | 11 | 768  | 10 | 2.32288  | 7.717042 | 861  | 11 |
| O4-2-148 | 0.074 | 0.001 | 1.478 | 0.026 | 0.144 | 0.002 | 0.014 | 2E-04 | 3.62  | 1051 | 17  | 921  | 11 | 868  | 10 | 279  | 4  | 6.105991 | 17.41199 | 868  | 10 |
| O4-2-121 | 0.072 | 0.001 | 1.48  | 0.027 | 0.149 | 0.002 | 0.046 | 6E-04 | 2.05  | 989  | 18  | 922  | 11 | 895  | 11 | 907  | 12 | 3.01676  | 9.50455  | 895  | 11 |
| O4-2-38  | 0.077 | 0.002 | 1.652 | 0.047 | 0.155 | 0.002 | 0.052 | 0.001 | 1.35  | 1131 | 34  | 990  | 18 | 928  | 13 | 1030 | 19 | 6.681034 | 17.94872 | 928  | 13 |
| O4-2-66  | 0.077 | 0.002 | 1.708 | 0.029 | 0.161 | 0.002 | 0.048 | 6E-04 | 23.84 | 1124 | 44  | 1011 | 11 | 960  | 12 | 952  | 12 | 5.3125   | 14.59075 | 960  | 12 |
| O4-2-194 | 0.093 | 0.002 | 2.124 | 0.036 | 0.165 | 0.002 | 0.032 | 4E-04 | 1.12  | 1491 | 16  | 1157 | 12 | 987  | 11 | 630  | 8  | 17.22391 | 33.80282 | 987  | 11 |
| O4-2-50  | 0.087 | 0.001 | 2.703 | 0.048 | 0.225 | 0.003 | 0.065 | 8E-04 | 0.86  | 1361 | 16  | 1329 | 13 | 1309 | 16 | 1265 | 16 | 1.527884 | 3.82072  | 1361 | 16 |
| O4-2-153 | 0.087 | 0.002 | 2.367 | 0.046 | 0.197 | 0.002 | 0.058 | 7E-04 | 5.86  | 1363 | 46  | 1233 | 14 | 1160 | 13 | 1147 | 13 | 6.293103 | 14.89362 | 1363 | 46 |
| O4-2-23  | 0.089 | 0.002 | 2.698 | 0.056 | 0.22  | 0.003 | 0.065 | 8E-04 | 4.58  | 1404 | 48  | 1328 | 15 | 1281 | 15 | 1273 | 15 | 3.669009 | 8.760684 | 1404 | 48 |
| O4-2-176 | 0.091 | 0.002 | 2.642 | 0.046 | 0.211 | 0.003 | 0.06  | 8E-04 | 2.5   | 1440 | 16  | 1312 | 13 | 1236 | 14 | 1178 | 16 | 6.148867 | 14.16667 | 1440 | 16 |
| O4-2-22  | 0.091 | 0.002 | 2.685 | 0.048 | 0.215 | 0.003 | 0.066 | 1E-03 | 3.44  | 1441 | 17  | 1324 | 13 | 1253 | 14 | 1283 | 18 | 5.666401 | 13.0465  | 1441 | 17 |
| O4-2-89  | 0.095 | 0.002 | 3.139 | 0.056 | 0.239 | 0.003 | 0.068 | 9E-04 | 1.12  | 1535 | 16  | 1442 | 14 | 1380 | 17 | 1321 | 17 | 4.492754 | 10.09772 | 1535 | 16 |
| O4-2-183 | 0.097 | 0.003 | 3.215 | 0.077 | 0.241 | 0.003 | 0.071 | 8E-04 | 2.04  | 1560 | 52  | 1461 | 19 | 1394 | 15 | 1381 | 15 | 4.806313 | 10.64103 | 1560 | 52 |
| O4-2-25  | 0.104 | 0.002 | 3.548 | 0.082 | 0.249 | 0.003 | 0.054 | 0.001 | 1.69  | 1688 | 23  | 1538 | 18 | 1431 | 18 | 1067 | 19 | 7.477289 | 15.22512 | 1688 | 23 |
| O4-2-37  | 0.106 | 0.002 | 3.671 | 0.089 | 0.251 | 0.004 | 0.061 | 0.001 | 1.7   | 1733 | 24  | 1565 | 19 | 1444 | 18 | 1198 | 22 | 8.379501 | 16.67628 | 1733 | 24 |
| O4-2-195 | 0.108 | 0.002 | 4.097 | 0.086 | 0.275 | 0.003 | 0.039 | 9E-04 | 2.47  | 1766 | 21  | 1654 | 17 | 1567 | 17 | 779  | 17 | 5.55201  | 11.2684  | 1766 | 21 |
| O4-2-17  | 0.119 | 0.002 | 5.003 | 0.084 | 0.305 | 0.003 | 0.082 | 0.001 | 4.91  | 1939 | 15  | 1820 | 14 | 1718 | 17 | 1593 | 22 | 5.937136 | 11.39763 | 1939 | 15 |
| O4-2-134 | 0.142 | 0.003 | 6.885 | 0.118 | 0.352 | 0.005 | 0.099 | 0.001 | 6.18  | 2252 | 38  | 2097 | 15 | 1942 | 22 | 1910 | 24 | 7.981462 | 13.76554 | 2252 | 38 |
| O4-2-60  | 0.15  | 0.003 | 7.698 | 0.14  | 0.372 | 0.005 | 0.095 | 0.001 | 2.24  | 2347 | 15  | 2196 | 16 | 2038 | 23 | 1839 | 24 | 7.752699 | 13.16574 | 2347 | 15 |
| O4-2-104 | 0.19  | 0.003 | 11.32 | 0.184 | 0.433 | 0.006 | 0.1   | 0.001 | 2.4   | 2739 | 12  | 2550 | 15 | 2318 | 26 | 1927 | 24 | 10.00863 | 15.37057 | 2739 | 12 |



Table DR11 Raw data of zircon U-Pb ages of sample 731C-13W-4W

| Grain  | Apparent Ages (Ma)                |       |                                  |       |                                  |       |                                   |       |       | Corr.% discordant                 |       |                                  |      | Best Age<br>(Ma)                 | 1σ  |                                   |     |                            |                            |      |     |
|--------|-----------------------------------|-------|----------------------------------|-------|----------------------------------|-------|-----------------------------------|-------|-------|-----------------------------------|-------|----------------------------------|------|----------------------------------|-----|-----------------------------------|-----|----------------------------|----------------------------|------|-----|
|        | $^{207}\text{Pb}/^{206}\text{Pb}$ | 1σ    | $^{207}\text{Pb}/^{235}\text{U}$ | 1σ    | $^{206}\text{Pb}/^{238}\text{U}$ | 1σ    | $^{208}\text{Pb}/^{232}\text{Th}$ | 1σ    | U/Th  | $^{207}\text{Pb}/^{206}\text{Pb}$ | 1σ    | $^{207}\text{Pb}/^{235}\text{U}$ | 1σ   | $^{206}\text{Pb}/^{238}\text{U}$ | 1σ  | $^{208}\text{Pb}/^{232}\text{Th}$ | 1σ  | $^{206}/^{238}$<br>207/235 | $^{207}/^{206}$<br>206/238 |      |     |
|        |                                   |       |                                  |       |                                  |       |                                   |       |       |                                   |       |                                  |      |                                  |     |                                   |     |                            |                            |      |     |
| O5-47  | 0.046                             | 0.108 | 0.026                            | 0.062 | 0.004                            | 5E-04 | 0.001                             | 2E-04 | 0.09  |                                   | 2580  | 26                               | 61   | 27                               | 3   | 23                                | 3   | -3.703704                  | \                          | 27   | 3   |
| O5-25  | 0.046                             | 0.002 | 0.027                            | 0.001 | 0.004                            | 1E-04 | 0.008                             | 0.004 | 87.65 |                                   | 94    | 27                               | 1    | 27.6                             | 0.6 | 159                               | 89  | -2.173913                  | \                          | 27.6 | 0.6 |
| O5-174 | 0.048                             | 0.003 | 0.029                            | 0.002 | 0.004                            | 7E-05 | 0.001                             | 0.002 | 140.8 | 100                               |       | 29                               | 2    | 28                               | 0.5 | 28                                | 41  | 3.571429                   | 72                         | 28   | 0.5 |
| O5-71  | 0.046                             | 0.009 | 0.029                            | 0.006 | 0.005                            | 1E-04 | 0.001                             | 3E-05 | 0.08  |                                   | 335   | 29                               | 6    | 29.7                             | 0.6 | 22.6                              | 0.6 | -2.356902                  | \                          | 29.7 | 0.6 |
| O5-127 | 0.052                             | 0.007 | 0.036                            | 0.004 | 0.005                            | 1E-04 | 0.068                             | 0.006 | 132.3 | 304                               | 228   | 36                               | 4    | 32.2                             | 0.8 | 1330                              | 109 | 11.80124                   | 89.40789                   | 32.2 | 0.8 |
| O5-53  | 0.047                             | 0.002 | 0.033                            | 0.001 | 0.005                            | 8E-05 | 0.002                             | 3E-05 | 1.64  | 62                                | 49    | 33                               | 1    | 32.8                             | 0.5 | 35.9                              | 0.6 | 0.609756                   | 47.09677                   | 32.8 | 0.5 |
| O5-05  | 0.05                              | 0.002 | 0.043                            | 0.002 | 0.006                            | 9E-05 | 0.002                             | 6E-05 | 3.47  | 216                               | 67    | 43                               | 2    | 40                               | 0.6 | 48                                | 1   | 7.5                        | 81.48148                   | 40   | 0.6 |
| O5-43  | 0.046                             | 0.003 | 0.042                            | 0.002 | 0.007                            | 2E-04 | 0.002                             | 2E-04 | 1.37  |                                   | 127   | 42                               | 2    | 42.5                             | 1   | 48                                | 3   | -1.176471                  | \                          | 42.5 | 1   |
| O5-63  | 0.05                              | 0.005 | 0.047                            | 0.005 | 0.007                            | 2E-04 | 0.002                             | 2E-04 | 4.02  | 211                               | 179   | 46                               | 5    | 43                               | 1   | 50                                | 3   | 6.976744                   | 79.62085                   | 43   | 1   |
| O5-27  | 0.049                             | 0.002 | 0.046                            | 0.002 | 0.007                            | 1E-04 | 0.002                             | 3E-05 | 1.16  | 150                               | 60    | 46                               | 2    | 43.9                             | 0.8 | 41.2                              | 0.6 | 4.783599                   | 70.73333                   | 43.9 | 0.8 |
| O5-195 | 0.053                             | 0.004 | 0.051                            | 0.004 | 0.007                            | 1E-04 | 0.002                             | 6E-05 | 1.12  | 312                               | 124   | 50                               | 3    | 45.1                             | 0.9 | 45                                | 1   | 10.86475                   | 85.54487                   | 45.1 | 0.9 |
| O5-30  | 0.049                             | 0.005 | 0.05                             | 0.005 | 0.007                            | 2E-04 | 0.003                             | 8E-05 | 0.91  | 156                               | 166   | 49                               | 5    | 47                               | 1   | 52                                | 2   | 4.255319                   | 69.87179                   | 47   | 1   |
| O5-55  | 0.054                             | 0.004 | 0.062                            | 0.004 | 0.008                            | 2E-04 | 0.002                             | 6E-05 | 1.47  | 366                               | 118   | 61                               | 4    | 53                               | 1   | 33                                | 1   | 15.09434                   | 85.51913                   | 53   | 1   |
| O5-79  | 0.046                             | 0.002 | 0.054                            | 0.002 | 0.009                            | 2E-04 | 0.004                             | 3E-04 | 1.28  |                                   | 94    | 54                               | 2    | 54.9                             | 1   | 74                                | 5   | -1.639344                  | \                          | 54.9 | 1   |
| O5-128 | 0.049                             | 0.009 | 0.065                            | 0.012 | 0.01                             | 3E-04 | 0.038                             | 0.003 | 33.53 | 150                               | 303   | 64                               | 11   | 62                               | 2   | 752                               | 63  | 3.225806                   | 58.66667                   | 62   | 2   |
| O5-54  | 0.048                             | 0.002 | 0.066                            | 0.003 | 0.01                             | 2E-04 | 0.003                             | 5E-05 | 4.61  | 101                               | 93    | 65                               | 2    | 64                               | 1   | 63.9                              | 0.9 | 1.5625                     | 36.63366                   | 64   | 1   |
| O5-07  | 0.049                             | 0.001 | 0.069                            | 0.002 | 0.01                             | 1E-04 | 0.003                             | 6E-05 | 4.02  | 159                               | 35    | 68                               | 2    | 65.4                             | 0.8 | 67                                | 1   | 3.975535                   | 58.86792                   | 65.4 | 0.8 |
| O5-29  | 0.051                             | 0.003 | 0.075                            | 0.004 | 0.011                            | 2E-04 | 0.004                             | 1E-04 | 3.57  | 247                               | 96    | 74                               | 4    | 68                               | 1   | 86                                | 3   | 8.823529                   | 72.46964                   | 68   | 1   |
| O5-66  | 0.053                             | 0.004 | 0.08                             | 0.006 | 0.011                            | 2E-04 | 0.003                             | 6E-05 | 0.36  | 337                               | 124   | 78                               | 5    | 70                               | 2   | 66                                | 1   | 11.42857                   | 79.22849                   | 70   | 2   |
| O5-186 | 0.055                             | 0.002 | 0.083                            | 0.003 | 0.011                            | 2E-04 | 0.003                             | 4E-05 | 30.46 | 398                               | 76    | 81                               | 2    | 70.3                             | 0.9 | 69.1                              | 0.8 | 15.22048                   | 82.33668                   | 70.3 | 0.9 |
| O5-184 | 0.049                             | 0.001 | 0.075                            | 0.002 | 0.011                            | 1E-04 | 0.003                             | 6E-05 | 3     | 160                               | 35    | 73                               | 2    | 70.5                             | 0.9 | 70                                | 1   | 3.546099                   | 55.9375                    | 70.5 | 0.9 |
| O5-136 | 0.055                             | 0.006 | 0.084                            | 0.009 | 0.011                            | 2E-04 | 0.004                             | 2E-04 | 1.56  | 426                               | 207   | 82                               | 9    | 71                               | 2   | 71                                | 3   | 15.49296                   | 83.33333                   | 71   | 2   |
| O5-90  | 0.054                             | 0.003 | 0.084                            | 0.004 | 0.011                            | 2E-04 | 0.009                             | 2E-04 | 4.6   | 382                               | 87    | 82                               | 4    | 72                               | 1   | 184                               | 4   | 13.88889                   | 81.15183                   | 72   | 1   |
| O5-96  | 0.05                              | 0.008 | 0.078                            | 0.012 | 0.011                            | 3E-04 | 0.004                             | 3E-04 | 2.19  | 187                               | 282   | 76                               | 11   | 73                               | 2   | 74                                | 5   | 4.109589                   | 60.96257                   | 73   | 2   |
| O5-40  | 0.052                             | 0.006 | 0.087                            | 0.009 | 0.012                            | 3E-04 | 0.004                             | 2E-04 | 1.47  | 294                               | 188   | 85                               | 9    | 77                               | 2   | 80                                | 3   | 10.38961                   | 73.80952                   | 77   | 2   |
| O5-62  | 0.051                             | 0.002 | 0.084                            | 0.004 | 0.012                            | 2E-04 | 0.004                             | 9E-05 | 1.91  | 248                               | 77    | 82                               | 4    | 77                               | 1   | 76                                | 2   | 6.493506                   | 68.95161                   | 77   | 1   |
| O5-51  | 0.053                             | 0.003 | 0.09                             | 0.004 | 0.012                            | 2E-04 | 0.005                             | 1E-04 | 2.72  | 328                               | 78    | 88                               | 4    | 79                               | 1   | 97                                | 2   | 11.39241                   | 75.91463                   | 79   | 1   |
| O5-48  | 0.047                             | 0.005 | 0.082                            | 0.008 | 0.012                            | 3E-04 | 0.004                             | 7E-05 | 0.77  | 74                                | 221   | 80                               | 8    | 80                               | 2   | 80                                | 1   | 0                          | -8.108108                  | 80   | 2   |
| O5-16  | 0.053                             | 0.004 | 0.092                            | 0.007 | 0.013                            | 3E-04 | 0.004                             | 1E-04 | 1.21  | 334                               | 132   | 89                               | 6    | 81                               | 2   | 72                                | 2   | 9.876543                   | 75.7485                    | 81   | 2   |
| O5-173 | 0.054                             | 0.006 | 0.095                            | 0.01  | 0.013                            | 3E-04 | 0.004                             | 2E-04 | 1.4   | 387                               | 195   | 92                               | 9    | 81                               | 2   | 82                                | 3   | 13.58025                   | 79.06977                   | 81   | 2   |
| O5-38  | 0.051                             | 0.002 | 0.092                            | 0.003 | 0.013                            | 2E-04 | 0.004                             | 6E-05 | 9.65  | 241                               | 93    | 89                               | 3    | 83                               | 1   | 83                                | 1   | 7.228916                   | 65.56017                   | 83   | 1   |
| O5-86  | 0.054                             | 0.013 | 0.097                            | 0.024 | 0.013                            | 5E-04 | 0.056                             | 0.015 | 73.27 | 350                               | 410   | 94                               | 22   | 84                               | 3   | 1098                              | 281 | 11.90476                   | 76                         | 84   | 3   |
| O5-167 | 0.048                             | 0.005 | 0.089                            | 0.009 | 0.013                            | 3E-04 | 0.025                             | 0.002 | 31.56 | 104                               | 176   | 87                               | 8    | 86                               | 2   | 495                               | 43  | 1.162791                   | 17.30769                   | 86   | 2   |
| O5-114 | 0.053                             | 0.007 | 0.1                              | 0.012 | 0.014                            | 3E-04 | 0.004                             | 2E-04 | 1.13  | 345                               | 242   | 96                               | 12   | 87                               | 2   | 86                                | 3   | 10.34483                   | 74.78261                   | 87   | 2   |
| O5-182 | 0.046                             | 0.008 | 0.086                            | 0.014 | 0.014                            | 4E-04 | 0.005                             | 1E-03 | 3.81  |                                   | 298   | 84                               | 13   | 87                               | 3   | 92                                | 19  | -3.448276                  | \                          | 87   | 3   |
| O5-170 | 0.046                             | 0.838 | 0.089                            | 1.617 | 0.014                            | 0.014 | 0.009                             | 0.007 | 0.35  |                                   | 15801 | 87                               | 1508 | 90                               | 90  | 183                               | 147 | -3.333333                  | \                          | 90   | 90  |
| O5-32  | 0.05                              | 0.006 | 0.105                            | 0.011 | 0.015                            | 4E-04 | 0.005                             | 2E-04 | 1.29  | 198                               | 193   | 101                              | 11   | 97                               | 3   | 104                               | 4   | 4.123711                   | 51.0101                    | 97   | 3   |
| O5-92  | 0.05                              | 0.002 | 0.107                            | 0.003 | 0.015                            | 2E-04 | 0.005                             | 2E-04 | 8.1   | 217                               | 55    | 103                              | 3    | 98                               | 1   | 97                                | 3   | 5.102041                   | 54.83871                   | 98   | 1   |
| O5-106 | 0.053                             | 0.004 | 0.112                            | 0.007 | 0.015                            | 2E-04 | 0.004                             | 9E-05 | 0.67  | 328                               | 120   | 108                              | 7    | 98                               | 2   | 84                                | 2   | 10.20408                   | 70.12195                   | 98   | 2   |
| O5-49  | 0.051                             | 0.003 | 0.111                            | 0.006 | 0.016                            | 3E-04 | 0.005                             | 1E-04 | 1.26  | 238                               | 88    | 107                              | 5    | 101                              | 2   | 104                               | 2   | 5.940594                   | 57.56303                   | 101  | 2   |
| O5-59  | 0.055                             | 0.007 | 0.119                            | 0.014 | 0.016                            | 4E-04 | 0.005                             | 1E-04 | 1.8   | 394                               | 277   | 114                              | 13   | 101                              | 2   | 100                               | 2   | 12.87129                   | 74.36548                   | 101  | 2   |
| O5-158 | 0.046                             | 0.006 | 0.105                            | 0.013 | 0.016                            | 4E-04 | 7E-04                             | 2E-04 | 0.14  |                                   | 238   | 101                              | 12   | 105                              | 2   | 14                                | 4   | -3.809524                  |                            | 105  | 2   |
| O5-122 | 0.051                             | 0.003 | 0.117                            | 0.008 | 0.017                            | 3E-04 | 0.003                             | 1E-04 | 1.13  | 229                               | 119   | 112                              | 7    | 107                              | 2   | 64                                | 2   | 4.672897                   | 53.27511                   | 107  | 2   |
| O5-153 | 0.051                             | 0.005 | 0.118                            | 0.012 | 0.017                            | 4E-04 | 0.009                             | 6E-04 | 5.19  | 221                               | 194   | 113                              | 11   | 108                              | 2   | 172                               | 12  | 4.62963                    | 51.13122                   | 108  | 2   |
| O5-103 | 0.053                             | 0.008 | 0.124                            | 0.02  | 0.017                            | 4E-04 | 0.006                             | 2E-04 | 0.96  | 329                               | 304   | 119                              | 18   | 109                              | 3   | 116                               | 5   | 9.174312                   | 66.8693                    | 109  | 3   |
| O5-01  | 0.051                             | 0.002 | 0.122                            | 0.005 | 0.017                            | 3E-04 | 0.006                             | 1E-04 | 1.25  | 225                               | 72    | 117                              | 5    | 112                              | 2   | 131                               | 2   | 4.464286                   | 50.22222                   | 112  | 2   |
| O5-84  | 0.049                             | 0.007 | 0.118                            | 0.016 | 0.018                            | 4E-04 | 0.03                              | 0.005 | 36.02 | 142                               | 246   | 114                              | 14   | 112                              | 3   | 607                               | 89  | 1.785714                   | 21.12676                   | 112  | 3   |
| O5-15  | 0.049                             | 0.002 | 0.122                            | 0.005 | 0.018                            | 3E-04 | 0.005                             | 1E-04 | 1.17  | 168                               | 74    | 117                              | 5    | 114                              | 2   | 100                               | 2   | 2.631579                   | 32.14286                   | 114  | 2   |
| O5-147 | 0.049                             | 0.015 | 0.123                            | 0.038 | 0.018                            | 8E-04 | 0.009                             | 9E-04 | 2     | 137                               | 461   | 118                              | 35   | 117                              | 5   | 173                               | 18  | 0.854701                   | 14.59854                   | 117  | 5   |
| O5-22  | 0.051                             | 0.014 | 0.135                            | 0.037 | 0.019                            | 0.001 | 0.007                             | 7E-04 | 1.34  | 250                               | 415   | 129                              | 33   | 122                              | 7   | 149                               | 13  | 5.737705                   | 51.2                       | 122  | 7   |
| O5-121 | 0.049                             | 9E-04 | 0.135                            | 0.002 | 0.02                             | 2E-04 | 0.007                             | 2E-04 | 65.37 | 171                               | 23    | 129                              | 2    | 126                              | 1   | 145                               | 4   | 2.380952                   | 26.31579                   | 126  | 1   |
| O5-110 | 0.053                             | 0.007 | 0.15                             | 0.02  | 0.02                             | 5E-04 | 0.006                             | 2E-04 | 0.78  | 334                               | 254   | 142                              | 18   | 130                              | 3   | 116                               | 5   | 9.230769                   | 61.07784                   | 130  | 3   |
| O5-193 | 0.054                             | 0.003 | 0.154                            | 0.008 | 0.021                            | 4E-04 | 0.026                             | 0.002 | 33.77 | 391                               | 88    | 145                              | 7    | 131                              | 2   | 521                               | 30  | 10.68702                   | 66.49616                   | 131  | 2   |
| O5-52  | 0.056                             | 0.005 | 0.162                            | 0.014 | 0.021                            | 5E-04 | 0.008                             | 6E-04 | 5.94  | 438                               | 146   | 152                              | 12   | 134                              | 3   | 170                               | 11  | 13.43284                   | 69.40639                   | 134  | 3   |
| O5-196 | 0.055                             | 0.002 | 0.164                            | 0.006 | 0.022                            | 3E-04 | 0.029                             | 0.001 | 44.56 | 426                               | 52    | 154                              | 5    | 137                              | 2   | 583                               | 22  | 12.40876                   | 67.84038                   | 137  | 2   |
| O5-198 | 0.055                             | 0.002 | 0.182                            | 0.007 | 0.024                            | 4E-04 | 0.013                             | 4E-04 | 8.22  | 409                               | 64    | 170                              | 6    | 153                              | 2   | 263                               | 8   | 11.11111                   | 62.59169                   | 153  | 2   |
| O5-179 | 0.052                             | 0.003 | 0.183                            | 0.01  | 0.025                            | 4E-04 | 0.026                             | 8E-04 | 6.67  | 295                               | 97    | 170                              | 9    | 162                              | 3   | 512                               | 16  | 4.938272                   | 45.08475                   | 162  | 3   |
| O5-26  | 0.051                             | 0.002 | 0.193                            | 0.005 | 0.027                            | 4E-04 | 0.009                             | 1E-04 | 14.34 | 261                               | 76    | 179                              | 5    | 173                              | 3   | 172                               | 2   | 3.468208                   | 33.71648                   | 173  | 3   |
| O5-94  | 0.05                              | 0.002 | 0.191                            | 0.006 | 0.028                            | 3E-04 | 0.011                             | 4E-04 | 11.63 | 199                               | 52    | 177                              | 5    | 176                              | 2   | 217                               | 8   | 0.568182                   | 11.55779                   | 176  | 2   |
|        |                                   |       |                                  |       |                                  |       |                                   |       |       |                                   |       |                                  |      |                                  |     |                                   |     |                            |                            |      |     |



|        |       |       |       |       |       |       |       |       |       |      |     |      |    |      |    |      |    |           |           |      |    |
|--------|-------|-------|-------|-------|-------|-------|-------|-------|-------|------|-----|------|----|------|----|------|----|-----------|-----------|------|----|
| O5-154 | 0.064 | 0.004 | 1.026 | 0.064 | 0.116 | 0.002 | 0.035 | 4E-04 | 1.26  | 753  | 141 | 717  | 32 | 706  | 11 | 704  | 8  | 1.558074  | 6.2417    | 706  | 11 |
| O5-135 | 0.072 | 0.002 | 1.154 | 0.026 | 0.116 | 0.001 | 0.021 | 4E-04 | 3.07  | 989  | 27  | 779  | 12 | 708  | 8  | 413  | 8  | 10.02825  | 28.41254  | 708  | 8  |
| O5-185 | 0.066 | 0.001 | 1.062 | 0.018 | 0.117 | 0.001 | 0.028 | 4E-04 | 1.91  | 797  | 17  | 735  | 9  | 715  | 9  | 549  | 7  | 2.797203  | 10.28858  | 715  | 9  |
| O5-44  | 0.07  | 0.002 | 1.13  | 0.028 | 0.118 | 0.002 | 0.028 | 3E-04 | 1.03  | 919  | 27  | 768  | 13 | 716  | 11 | 552  | 7  | 7.26257   | 22.08923  | 716  | 11 |
| O5-82  | 0.067 | 0.001 | 1.093 | 0.019 | 0.118 | 0.001 | 0.036 | 4E-04 | 12.28 | 852  | 44  | 750  | 9  | 716  | 7  | 711  | 7  | 4.748603  | 15.96244  | 716  | 7  |
| O5-188 | 0.063 | 0.002 | 1.043 | 0.025 | 0.12  | 0.002 | 0.037 | 5E-04 | 5.04  | 711  | 58  | 725  | 12 | 730  | 9  | 731  | 9  | -0.684932 | -2.672293 | 730  | 9  |
| O5-142 | 0.07  | 0.002 | 1.176 | 0.034 | 0.121 | 0.002 | 0.016 | 0.001 | 13.3  | 939  | 37  | 789  | 16 | 737  | 9  | 319  | 21 | 7.055631  | 21.51225  | 737  | 9  |
| O5-200 | 0.076 | 0.001 | 1.28  | 0.025 | 0.122 | 0.002 | 0.03  | 4E-04 | 1.43  | 1096 | 20  | 837  | 11 | 743  | 9  | 605  | 8  | 12.65141  | 32.20803  | 743  | 9  |
| O5-199 | 0.078 | 0.001 | 1.32  | 0.026 | 0.123 | 0.002 | 0.035 | 5E-04 | 2.01  | 1138 | 20  | 855  | 11 | 750  | 9  | 697  | 10 | 14        | 34.0949   | 750  | 9  |
| O5-42  | 0.067 | 0.002 | 1.145 | 0.038 | 0.124 | 0.002 | 0.035 | 6E-04 | 1.44  | 843  | 42  | 775  | 18 | 752  | 12 | 698  | 11 | 3.058511  | 10.79478  | 752  | 12 |
| O5-98  | 0.074 | 0.002 | 1.273 | 0.031 | 0.124 | 0.001 | 0.022 | 4E-04 | 2.11  | 1049 | 31  | 834  | 14 | 755  | 8  | 431  | 8  | 10.46358  | 28.02669  | 755  | 8  |
| O5-162 | 0.076 | 0.002 | 1.317 | 0.028 | 0.125 | 0.002 | 0.027 | 5E-04 | 2.22  | 1103 | 22  | 853  | 12 | 760  | 9  | 533  | 9  | 12.23684  | 31.09701  | 760  | 9  |
| O5-24  | 0.07  | 0.001 | 1.205 | 0.027 | 0.125 | 0.002 | 0.025 | 3E-04 | 1.94  | 918  | 23  | 803  | 13 | 762  | 11 | 500  | 7  | 5.380577  | 16.99346  | 762  | 11 |
| O5-138 | 0.066 | 0.002 | 1.146 | 0.027 | 0.126 | 0.002 | 0.037 | 9E-04 | 10.88 | 814  | 30  | 775  | 13 | 762  | 9  | 732  | 18 | 1.706037  | 6.388206  | 762  | 9  |
| O5-20  | 0.077 | 0.003 | 1.364 | 0.06  | 0.129 | 0.002 | 0.037 | 0.001 | 2.24  | 1110 | 60  | 874  | 26 | 784  | 13 | 728  | 21 | 11.47959  | 29.36937  | 784  | 13 |
| O5-73  | 0.069 | 0.001 | 1.233 | 0.025 | 0.129 | 0.002 | 0.037 | 4E-04 | 1.19  | 903  | 19  | 816  | 11 | 784  | 11 | 733  | 7  | 4.081633  | 13.17829  | 784  | 11 |
| O5-61  | 0.069 | 0.002 | 1.257 | 0.034 | 0.131 | 0.002 | 0.023 | 5E-04 | 2.46  | 909  | 31  | 827  | 15 | 796  | 12 | 462  | 9  | 3.894472  | 12.43124  | 796  | 12 |
| O5-119 | 0.076 | 0.002 | 1.375 | 0.03  | 0.131 | 0.001 | 0.016 | 3E-04 | 2.49  | 1092 | 26  | 878  | 13 | 796  | 8  | 312  | 6  | 10.30151  | 27.10623  | 796  | 8  |
| O5-50  | 0.072 | 0.002 | 1.312 | 0.035 | 0.132 | 0.002 | 0.033 | 0.001 | 25.64 | 982  | 29  | 851  | 15 | 802  | 12 | 655  | 21 | 6.109726  | 18.32994  | 802  | 12 |
| O5-10  | 0.069 | 0.001 | 1.279 | 0.028 | 0.134 | 0.002 | 0.04  | 7E-04 | 3.73  | 913  | 25  | 837  | 12 | 808  | 10 | 785  | 13 | 3.589109  | 11.50055  | 808  | 10 |
| O5-118 | 0.072 | 0.002 | 1.332 | 0.035 | 0.134 | 0.002 | 0.041 | 4E-04 | 3.1   | 987  | 60  | 860  | 15 | 811  | 9  | 803  | 8  | 6.041924  | 17.83181  | 811  | 9  |
| O5-88  | 0.066 | 0.002 | 1.238 | 0.04  | 0.137 | 0.002 | 0.042 | 4E-04 | 1.66  | 799  | 73  | 818  | 18 | 825  | 9  | 826  | 8  | -0.848485 | -3.254068 | 825  | 9  |
| O5-89  | 0.069 | 0.003 | 1.308 | 0.046 | 0.138 | 0.002 | 0.042 | 4E-04 | 2.28  | 894  | 78  | 849  | 20 | 832  | 9  | 830  | 8  | 2.043269  | 6.935123  | 832  | 9  |
| O5-37  | 0.07  | 0.002 | 1.383 | 0.033 | 0.143 | 0.002 | 0.025 | 4E-04 | 3.08  | 933  | 25  | 882  | 14 | 861  | 13 | 493  | 8  | 2.439024  | 7.717042  | 861  | 13 |
| O5-93  | 0.082 | 0.001 | 1.634 | 0.028 | 0.145 | 0.001 | 0.036 | 5E-04 | 3.24  | 1235 | 19  | 984  | 11 | 874  | 8  | 715  | 10 | 12.58581  | 29.23077  | 874  | 8  |
| O5-132 | 0.07  | 0.002 | 1.406 | 0.031 | 0.146 | 0.002 | 0.044 | 5E-04 | 6.25  | 921  | 52  | 891  | 13 | 879  | 9  | 877  | 9  | 1.365188  | 4.560261  | 879  | 9  |
| O5-09  | 0.073 | 0.002 | 1.49  | 0.04  | 0.148 | 0.002 | 0.032 | 7E-04 | 3.32  | 1016 | 33  | 926  | 16 | 889  | 11 | 632  | 14 | 4.16198   | 12.5      | 889  | 11 |
| O5-152 | 0.076 | 0.002 | 1.554 | 0.035 | 0.148 | 0.002 | 0.032 | 1E-03 | 12.02 | 1101 | 26  | 952  | 14 | 889  | 11 | 637  | 19 | 7.086614  | 19.25522  | 889  | 11 |
| O5-14  | 0.078 | 0.003 | 1.598 | 0.065 | 0.149 | 0.002 | 0.045 | 6E-04 | 3.64  | 1148 | 89  | 970  | 26 | 893  | 13 | 881  | 12 | 8.62262   | 22.21254  | 893  | 13 |
| O5-151 | 0.084 | 0.003 | 1.725 | 0.054 | 0.149 | 0.002 | 0.039 | 0.001 | 5.73  | 1298 | 39  | 1018 | 20 | 893  | 12 | 776  | 28 | 13.99776  | 31.20185  | 893  | 12 |
| O5-70  | 0.072 | 0.002 | 1.493 | 0.04  | 0.15  | 0.002 | 0.035 | 5E-04 | 0.84  | 994  | 29  | 928  | 16 | 900  | 13 | 697  | 10 | 3.111111  | 9.45674   | 900  | 13 |
| O5-60  | 0.073 | 0.002 | 1.556 | 0.038 | 0.154 | 0.002 | 0.047 | 7E-04 | 2.12  | 1027 | 26  | 953  | 15 | 921  | 13 | 920  | 13 | 3.474484  | 10.32132  | 921  | 13 |
| O5-107 | 0.077 | 0.002 | 1.646 | 0.036 | 0.155 | 0.002 | 0.027 | 5E-04 | 2.51  | 1127 | 26  | 988  | 14 | 927  | 9  | 533  | 9  | 6.580367  | 17.74623  | 927  | 9  |
| O5-72  | 0.078 | 0.002 | 1.673 | 0.037 | 0.155 | 0.002 | 0.008 | 1E-04 | 1.35  | 1148 | 22  | 998  | 14 | 932  | 13 | 167  | 3  | 7.081545  | 18.81533  | 932  | 13 |
| O5-11  | 0.086 | 0.002 | 1.903 | 0.046 | 0.161 | 0.002 | 0.047 | 8E-04 | 1.56  | 1328 | 27  | 1082 | 16 | 964  | 12 | 931  | 15 | 12.24066  | 27.40964  | 964  | 12 |
| O5-183 | 0.079 | 0.001 | 1.805 | 0.029 | 0.166 | 0.002 | 0.046 | 6E-04 | 2.04  | 1169 | 15  | 1047 | 11 | 990  | 12 | 915  | 11 | 5.757576  | 15.31223  | 990  | 12 |
| O5-101 | 0.088 | 0.002 | 2.027 | 0.035 | 0.167 | 0.002 | 0.035 | 4E-04 | 1.05  | 1381 | 18  | 1125 | 12 | 997  | 9  | 693  | 8  | 12.83852  | 27.80594  | 997  | 9  |
| O5-04  | 0.077 | 0.002 | 1.979 | 0.056 | 0.186 | 0.003 | 0.018 | 5E-04 | 1.98  | 1122 | 35  | 1108 | 19 | 1102 | 14 | 354  | 10 | 0.544465  | 1.782531  | 1122 | 35 |
| O5-99  | 0.078 | 0.002 | 1.883 | 0.039 | 0.174 | 0.002 | 0.025 | 4E-04 | 4.47  | 1158 | 25  | 1075 | 14 | 1035 | 10 | 491  | 8  | 3.864734  | 10.62176  | 1158 | 25 |
| O5-64  | 0.089 | 0.002 | 2.589 | 0.054 | 0.211 | 0.003 | 0.059 | 7E-04 | 1.31  | 1404 | 19  | 1298 | 15 | 1234 | 17 | 1166 | 12 | 5.186386  | 12.10826  | 1404 | 19 |
| O5-156 | 0.105 | 0.002 | 4.032 | 0.087 | 0.279 | 0.004 | 0.08  | 0.001 | 1.88  | 1709 | 22  | 1641 | 18 | 1587 | 18 | 1550 | 26 | 3.402647  | 7.138678  | 1709 | 22 |
| O5-134 | 0.105 | 0.002 | 3.758 | 0.072 | 0.259 | 0.003 | 0.03  | 7E-04 | 7.26  | 1717 | 19  | 1584 | 15 | 1486 | 15 | 595  | 13 | 6.594886  | 13.4537   | 1717 | 19 |
| O5-28  | 0.107 | 0.002 | 4.074 | 0.098 | 0.276 | 0.004 | 0.067 | 1E-03 | 1.74  | 1751 | 23  | 1649 | 20 | 1570 | 22 | 1314 | 19 | 5.031847  | 10.33695  | 1751 | 23 |
| O5-178 | 0.113 | 0.003 | 4.323 | 0.09  | 0.277 | 0.003 | 0.08  | 8E-04 | 5.79  | 1854 | 44  | 1698 | 17 | 1574 | 15 | 1550 | 15 | 7.878018  | 15.10248  | 1854 | 44 |
| O5-85  | 0.114 | 0.002 | 4.964 | 0.085 | 0.316 | 0.003 | 0.082 | 0.001 | 9.3   | 1860 | 16  | 1813 | 14 | 1772 | 17 | 1588 | 26 | 2.31377   | 4.731183  | 1860 | 16 |
| O5-143 | 0.157 | 0.003 | 9.522 | 0.187 | 0.439 | 0.005 | 0.121 | 0.002 | 1.68  | 2429 | 17  | 2390 | 18 | 2345 | 24 | 2307 | 36 | 1.918977  | 3.458213  | 2429 | 17 |
| O5-117 | 0.175 | 0.003 | 9.689 | 0.191 | 0.402 | 0.004 | 0.104 | 0.002 | 7.47  | 2602 | 19  | 2406 | 18 | 2180 | 21 | 2007 | 36 | 10.36697  | 16.21829  | 2602 | 19 |

Table DR11 Raw data of zircon U-Pb ages of sample 731C-14R-2W

| Grain  | Apparent Ages (Ma)                |       |                                  |       |                                  |       |                                   |       |       | Corr.% discordant                 |      |                                  |     |                                  | Best Age<br>(Ma) | 1σ                                |     |                            |                    |      |     |
|--------|-----------------------------------|-------|----------------------------------|-------|----------------------------------|-------|-----------------------------------|-------|-------|-----------------------------------|------|----------------------------------|-----|----------------------------------|------------------|-----------------------------------|-----|----------------------------|--------------------|------|-----|
|        | $^{207}\text{Pb}/^{206}\text{Pb}$ | 1σ    | $^{207}\text{Pb}/^{235}\text{U}$ | 1σ    | $^{206}\text{Pb}/^{238}\text{U}$ | 1σ    | $^{208}\text{Pb}/^{232}\text{Th}$ | 1σ    | U/Th  | $^{207}\text{Pb}/^{206}\text{Pb}$ | 1σ   | $^{207}\text{Pb}/^{235}\text{U}$ | 1σ  | $^{206}\text{Pb}/^{238}\text{U}$ | 1σ               | $^{208}\text{Pb}/^{232}\text{Th}$ | 1σ  | $^{206}/^{238}$<br>207/235 | 207/206<br>206/238 |      |     |
|        |                                   |       |                                  |       |                                  |       |                                   |       |       |                                   |      |                                  |     |                                  |                  |                                   |     |                            |                    |      |     |
| O6-171 | 0.049                             | 0.006 | 0.032                            | 0.004 | 0.005                            | 1E-04 | 0.039                             | 0.005 | 218.8 | 166                               | 226  | 32                               | 4   | 30.1                             | 0.9              | 780                               | 105 | 6.312292                   | 81.86747           | 30.1 | 0.9 |
| O6-30  | 0.053                             | 0.002 | 0.043                            | 0.002 | 0.006                            | 8E-05 | 0.002                             | 6E-05 | 2.65  | 318                               | 80   | 43                               | 2   | 37.9                             | 0.5              | 48                                | 1   | 13.45646                   | 88.08176           | 37.9 | 0.5 |
| O6-84  | 0.048                             | 0.009 | 0.04                             | 0.007 | 0.006                            | 2E-04 | 0.171                             | 0.017 | 168.3 | 91                                | 281  | 39                               | 7   | 39                               | 1                | 3195                              | 286 | 0                          | 57.14286           | 39   | 1   |
| O6-68  | 0.049                             | 0.012 | 0.054                            | 0.013 | 0.008                            | 2E-04 | 0.003                             | 4E-04 | 2.18  | 151                               | 420  | 54                               | 12  | 51                               | 1                | 51                                | 7   | 5.882353                   | 66.22517           | 51   | 1   |
| O6-01  | 0.048                             | 0.002 | 0.065                            | 0.003 | 0.01                             | 1E-04 | 0.003                             | 7E-05 | 4.82  | 82                                | 107  | 64                               | 3   | 63.6                             | 0.9              | 64                                | 1   | 0.628931                   | 22.43902           | 63.6 | 0.9 |
| O6-187 | 0.048                             | 0.002 | 0.07                             | 0.003 | 0.01                             | 2E-04 | 0.003                             | 1E-04 | 5.89  | 111                               | 64   | 68                               | 3   | 67                               | 1                | 69                                | 2   | 1.492537                   | 39.63964           | 67   | 1   |
| O6-40  | 0.048                             | 0.004 | 0.069                            | 0.006 | 0.011                            | 2E-04 | 0.003                             | 2E-04 | 2.81  | 75                                | 188  | 68                               | 5   | 68                               | 1                | 68                                | 3   | 0                          | 9.333333           | 68   | 1   |
| O6-28  | 0.055                             | 0.002 | 0.082                            | 0.003 | 0.011                            | 1E-04 | 0.003                             | 6E-05 | 9.75  | 423                               | 78   | 80                               | 3   | 69.2                             | 0.7              | 68                                | 1   | 15.60694                   | 83.64066           | 69.2 | 0.7 |
| O6-11  | 0.046                             | 0.008 | 0.071                            | 0.013 | 0.011                            | 2E-04 | 0.004                             | 2E-04 | 1.04  | 2                                 | 314  | 70                               | 12  | 72                               | 2                | 72                                | 4   | -2.777778                  | -3500              | 72   | 2   |
| O6-176 | 0.054                             | 0.008 | 0.086                            | 0.013 | 0.011                            | 4E-04 | 0.004                             | 2E-04 | 0.73  | 391                               | 272  | 83                               | 12  | 73                               | 3                | 73                                | 3   | 13.69863                   | 81.32992           | 73   | 3   |
| O6-75  | 0.05                              | 0.006 | 0.08                             | 0.009 | 0.012                            | 3E-04 | 0.004                             | 1E-04 | 2.25  | 201                               | 265  | 78                               | 9   | 74                               | 2                | 74                                | 3   | 5.405405                   | 63.18408           | 74   | 2   |
| O6-137 | 0.05                              | 0.003 | 0.08                             | 0.005 | 0.012                            | 2E-04 | 0.004                             | 1E-04 | 1.5   | 199                               | 121  | 78                               | 5   | 75                               | 1                | 77                                | 2   | 4                          | 62.31156           | 75   | 1   |
| O6-142 | 0.048                             | 0.006 | 0.081                            | 0.01  | 0.012                            | 4E-04 | 0.004                             | 2E-04 | 1.47  | 116                               | 228  | 79                               | 10  | 78                               | 2                | 78                                | 4   | 1.282051                   | 32.75862           | 78   | 2   |
| O6-39  | 0.05                              | 0.005 | 0.091                            | 0.01  | 0.013                            | 2E-04 | 0.004                             | 9E-05 | 1.19  | 176                               | 239  | 89                               | 9   | 86                               | 2                | 85                                | 2   | 3.488372                   | 51.13636           | 86   | 2   |
| O6-128 | 0.055                             | 0.006 | 0.118                            | 0.013 | 0.015                            | 4E-04 | 0.005                             | 2E-04 | 1.6   | 427                               | 191  | 113                              | 11  | 98                               | 3                | 92                                | 5   | 15.30612                   | 77.04918           | 98   | 3   |
| O6-22  | 0.053                             | 0.002 | 0.114                            | 0.004 | 0.015                            | 2E-04 | 0.005                             | 7E-05 | 0.9   | 344                               | 62   | 109                              | 4   | 99                               | 1                | 99                                | 1   | 10.10101                   | 71.22093           | 99   | 1   |
| O6-50  | 0.051                             | 0.005 | 0.109                            | 0.011 | 0.016                            | 3E-04 | 0.005                             | 6E-05 | 0.63  | 218                               | 239  | 105                              | 10  | 100                              | 2                | 100                               | 1   | 5                          | 54.12844           | 100  | 2   |
| O6-175 | 0.058                             | 0.006 | 0.132                            | 0.014 | 0.016                            | 5E-04 | 0.005                             | 3E-04 | 1.9   | 535                               | 184  | 126                              | 12  | 105                              | 3                | 109                               | 6   | 20                         | 80.37383           | 105  | 3   |
| O6-26  | 0.046                             | 0.005 | 0.11                             | 0.011 | 0.017                            | 3E-04 | 0.006                             | 5E-04 | 3.22  |                                   | 208  | 106                              | 10  | 111                              | 2                | 112                               | 11  | -4.504505                  | \                  | 111  | 2   |
| O6-55  | 0.056                             | 0.032 | 0.148                            | 0.083 | 0.019                            | 8E-04 | 0.006                             | 0.004 | 3.77  | 458                               | 1027 | 140                              | 74  | 122                              | 5                | 120                               | 77  | 14.7541                    | 73.36245           | 122  | 5   |
| O6-10  | 0.051                             | 0.002 | 0.175                            | 0.006 | 0.025                            | 3E-04 | 0.011                             | 4E-04 | 13.69 | 252                               | 50   | 163                              | 5   | 157                              | 2                | 223                               | 7   | 3.821656                   | 37.69841           | 157  | 2   |
| O6-05  | 0.057                             | 0.002 | 0.208                            | 0.008 | 0.027                            | 4E-04 | 0.035                             | 0.001 | 18.01 | 483                               | 57   | 192                              | 6   | 169                              | 2                | 688                               | 20  | 13.60947                   | 65.01035           | 169  | 2   |
| O6-151 | 0.051                             | 0.002 | 0.192                            | 0.008 | 0.027                            | 4E-04 | 0.008                             | 2E-04 | 1.87  | 227                               | 65   | 178                              | 7   | 175                              | 3                | 159                               | 3   | 1.714286                   | 22.90749           | 175  | 3   |
| O6-13  | 0.058                             | 0.001 | 0.23                             | 0.006 | 0.029                            | 3E-04 | 0.023                             | 5E-04 | 17.83 | 529                               | 33   | 211                              | 5   | 183                              | 2                | 462                               | 10  | 15.30055                   | 65.40643           | 183  | 2   |
| O6-76  | 0.058                             | 0.004 | 0.316                            | 0.021 | 0.039                            | 8E-04 | 0.006                             | 3E-04 | 1.65  | 533                               | 112  | 279                              | 16  | 249                              | 5                | 125                               | 5   | 12.04819                   | 53.2833            | 249  | 5   |
| O6-99  | 0.057                             | 0.003 | 0.314                            | 0.018 | 0.04                             | 7E-04 | 0.015                             | 4E-04 | 1.66  | 497                               | 94   | 277                              | 14  | 252                              | 5                | 293                               | 8   | 9.920635                   | 49.29577           | 252  | 5   |
| O6-135 | 0.055                             | 0.001 | 0.345                            | 0.008 | 0.046                            | 5E-04 | 0.023                             | 7E-04 | 18.21 | 408                               | 35   | 301                              | 6   | 287                              | 3                | 462                               | 13  | 4.878049                   | 29.65686           | 287  | 3   |
| O6-170 | 0.053                             | 0.002 | 0.361                            | 0.013 | 0.049                            | 8E-04 | 0.014                             | 3E-04 | 1.12  | 337                               | 55   | 313                              | 10  | 310                              | 5                | 273                               | 5   | 0.967742                   | 8.011869           | 310  | 5   |
| O6-71  | 0.06                              | 0.005 | 0.434                            | 0.039 | 0.052                            | 0.001 | 0.006                             | 3E-04 | 0.78  | 609                               | 152  | 366                              | 27  | 329                              | 8                | 113                               | 5   | 11.2462                    | 45.97701           | 329  | 8   |
| O6-101 | 0.053                             | 0.002 | 0.384                            | 0.011 | 0.052                            | 7E-04 | 0.016                             | 2E-04 | 18.91 | 341                               | 74   | 330                              | 8   | 329                              | 4                | 328                               | 5   | 0.303951                   | 3.519062           | 329  | 4   |
| O6-49  | 0.055                             | 0.002 | 0.402                            | 0.01  | 0.053                            | 6E-04 | 0.017                             | 3E-04 | 19.88 | 405                               | 65   | 343                              | 8   | 334                              | 4                | 333                               | 5   | 2.694611                   | 17.53086           | 334  | 4   |
| O6-86  | 0.06                              | 0.003 | 0.448                            | 0.022 | 0.054                            | 9E-04 | 0.015                             | 3E-04 | 0.84  | 591                               | 76   | 376                              | 15  | 342                              | 6                | 302                               | 6   | 9.94152                    | 42.13198           | 342  | 6   |
| O6-82  | 0.058                             | 0.001 | 0.439                            | 0.009 | 0.055                            | 7E-04 | 0.034                             | 5E-04 | 11.84 | 538                               | 22   | 369                              | 6   | 343                              | 4                | 669                               | 10  | 7.580175                   | 36.24535           | 343  | 4   |
| O6-95  | 0.06                              | 0.002 | 0.485                            | 0.018 | 0.059                            | 9E-04 | 0.024                             | 4E-04 | 1.31  | 595                               | 55   | 401                              | 13  | 368                              | 6                | 478                               | 9   | 8.967391                   | 38.15126           | 368  | 6   |
| O6-12  | 0.057                             | 0.003 | 0.467                            | 0.022 | 0.06                             | 8E-04 | 0.019                             | 2E-04 | 3.3   | 480                               | 110  | 389                              | 15  | 374                              | 5                | 372                               | 4   | 4.010695                   | 22.08333           | 374  | 5   |
| O6-184 | 0.056                             | 0.001 | 0.47                             | 0.009 | 0.061                            | 8E-04 | 0.019                             | 3E-04 | 32.56 | 463                               | 54   | 391                              | 6   | 379                              | 5                | 378                               | 5   | 3.166227                   | 18.14255           | 379  | 5   |
| O6-141 | 0.059                             | 0.002 | 0.502                            | 0.019 | 0.062                            | 1E-03 | 0.003                             | 1E-04 | 1.76  | 576                               | 56   | 413                              | 13  | 385                              | 6                | 51                                | 2   | 7.272727                   | 33.15972           | 385  | 6   |
| O6-174 | 0.064                             | 0.002 | 0.571                            | 0.019 | 0.065                            | 0.001 | 0.007                             | 3E-04 | 4.31  | 730                               | 44   | 458                              | 12  | 406                              | 6                | 143                               | 6   | 12.80788                   | 44.38356           | 406  | 6   |
| O6-200 | 0.062                             | 0.002 | 0.58                             | 0.016 | 0.067                            | 0.001 | 0.022                             | 4E-04 | 0.86  | 686                               | 34   | 465                              | 10  | 421                              | 6                | 444                               | 7   | 10.45131                   | 38.62974           | 421  | 6   |
| O6-79  | 0.06                              | 0.001 | 0.566                            | 0.012 | 0.068                            | 9E-04 | 0.022                             | 4E-04 | 4.92  | 610                               | 25   | 456                              | 8   | 426                              | 5                | 437                               | 7   | 7.042254                   | 30.16393           | 426  | 5   |
| O6-83  | 0.065                             | 0.002 | 0.619                            | 0.017 | 0.069                            | 1E-03 | 0.018                             | 2E-04 | 0.47  | 782                               | 36   | 489                              | 11  | 429                              | 6                | 351                               | 5   | 13.98601                   | 45.14066           | 429  | 6   |
| O6-161 | 0.056                             | 9E-04 | 0.547                            | 0.01  | 0.071                            | 1E-03 | 0.028                             | 6E-04 | 23.13 | 439                               | 20   | 443                              | 7   | 444                              | 6                | 566                               | 11  | -0.225225                  | -1.138952          | 444  | 6   |
| O6-92  | 0.067                             | 0.002 | 0.677                            | 0.017 | 0.073                            | 0.001 | 0.018                             | 3E-04 | 0.5   | 840                               | 31   | 525                              | 10  | 456                              | 6                | 357                               | 5   | 15.13158                   | 45.71429           | 456  | 6   |
| O6-156 | 0.059                             | 0.001 | 0.614                            | 0.012 | 0.075                            | 0.001 | 0.022                             | 3E-04 | 4.62  | 572                               | 21   | 486                              | 8   | 468                              | 6                | 434                               | 6   | 3.846154                   | 18.18182           | 468  | 6   |
| O6-186 | 0.055                             | 0.018 | 0.592                            | 0.198 | 0.079                            | 0.003 | 0.025                             | 0.003 | 1.51  | 392                               | 616  | 472                              | 126 | 488                              | 18               | 491                               | 61  | -3.278689                  | -24.4898           | 488  | 18  |
| O6-110 | 0.063                             | 0.002 | 0.685                            | 0.023 | 0.079                            | 0.001 | 0.021                             | 4E-04 | 0.61  | 696                               | 45   | 530                              | 14  | 492                              | 7                | 418                               | 7   | 7.723577                   | 29.31034           | 492  | 7   |
| O6-198 | 0.065                             | 0.011 | 0.715                            | 0.122 | 0.079                            | 0.003 | 0.024                             | 9E-04 | 3.42  | 784                               | 389  | 548                              | 72  | 493                              | 17               | 485                               | 18  | 11.15619                   | 37.11735           | 493  | 17  |
| O6-199 | 0.064                             | 0.001 | 0.729                            | 0.016 | 0.083                            | 0.001 | 0.025                             | 6E-04 | 16.23 | 731                               | 24   | 556                              | 9   | 514                              | 7                | 498                               | 12  | 8.171206                   | 29.68536           | 514  | 7   |
| O6-173 | 0.058                             | 9E-04 | 0.663                            | 0.012 | 0.083                            | 0.001 | 0.025                             | 4E-04 | 2.57  | 523                               | 19   | 517                              | 7   | 515                              | 7                | 506                               | 7   | 0.38835                    | 1.529637           | 515  | 7   |
| O6-192 | 0.06                              | 0.001 | 0.698                            | 0.015 | 0.084                            | 0.001 | 0.006                             | 2E-04 | 5.76  | 603                               | 24   | 537                              | 9   | 522                              | 7                | 123                               | 3   | 2.873563                   | 13.43284           | 522  | 7   |
| O6-33  | 0.06                              | 0.002 | 0.705                            | 0.026 | 0.085                            | 1E-03 | 0.026                             | 2E-04 | 1.46  | 612                               | 86   | 542                              | 16  | 525                              | 6                | 523                               | 5   | 3.238095                   | 14.21569           | 525  | 6   |
| O6-09  | 0.063                             | 9E-04 | 0.749                            | 0.011 | 0.086                            | 9E-04 | 0.032                             | 4E-04 | 3.34  | 722                               | 14   | 568                              | 6   | 530                              | 5                | 634                               | 7   | 7.169811                   | 26.5928            | 530  | 5   |
| O6-29  | 0.063                             | 0.001 | 0.752                            | 0.014 | 0.086                            | 9E-04 | 0.025                             | 4E-04 | 7.25  | 717                               | 22   | 570                              | 8   | 533                              | 5                | 499                               | 8   | 6.941839                   | 25.66248           | 533  | 5   |
| O6-193 | 0.068                             | 0.003 | 0.819                            | 0.037 | 0.087                            | 0.002 | 0.033                             | 8E-04 | 1.64  | 867                               | 65   | 607                              | 21  | 540                              | 9                | 647                               | 15  | 12.40741                   | 37.71626           | 540  | 9   |
| O6-97  | 0.064                             | 0.003 | 0.781                            | 0.042 | 0.089                            | 0.002 | 0.021                             | 0.001 | 6.62  | 728                               | 84   | 586                              | 24  | 550                              | 10               | 420                               | 27  | 6.545455                   | 24.45055           | 550  | 10  |
| O6-96  | 0.063                             | 0.001 | 0.808                            | 0.02  | 0.093                            | 0.001 | 0.031                             | 5E-04 | 1.41  | 700                               | 29   | 601                              | 11  | 575                              | 8                | 616                               | 9   | 4.521739                   | 17.85714           | 575  | 8   |
| O6-42  | 0.065                             | 0.001 | 0.843                            | 0.017 | 0.094                            | 0.001 | 0.012                             | 2E-04 | 1.68  | 779                               | 25   | 621                              | 9   | 579                              | 6                | 249                               | 4   | 7.253886                   | 25.67394           | 579  | 6   |
| O6-16  | 0.065                             | 0.001 | 0.845                            | 0.014 | 0.094                            | 1E-03 | 0.017                             | 2E-04 | 1.41  | 774                               | 19   | 622                              | 8   | 580                              | 6                | 340                               | 4   | 7.241379                   | 25.0646            | 580  | 6   |
| O6-69  | 0.064                             | 0.002 | 0.842                            | 0.022 | 0.095                            | 0.001 | 0.029                             | 3E-04 | 4.62  | 756                               | 63   | 620                              | 12  | 584                              | 7                |                                   |     |                            |                    |      |     |

|        |       |       |       |       |       |       |       |       |       |      |    |      |    |      |    |      |    |          |          |      |    |
|--------|-------|-------|-------|-------|-------|-------|-------|-------|-------|------|----|------|----|------|----|------|----|----------|----------|------|----|
| O6-107 | 0.073 | 0.002 | 1.497 | 0.035 | 0.15  | 0.002 | 0.031 | 6E-04 | 2.01  | 1001 | 26 | 929  | 14 | 899  | 12 | 626  | 12 | 3.337041 | 10.18981 | 899  | 12 |
| O6-152 | 0.073 | 0.001 | 1.543 | 0.031 | 0.152 | 0.002 | 0.044 | 6E-04 | 0.96  | 1025 | 20 | 948  | 12 | 914  | 12 | 875  | 11 | 3.719912 | 10.82927 | 914  | 12 |
| O6-64  | 0.087 | 0.001 | 1.837 | 0.033 | 0.153 | 0.002 | 0.034 | 5E-04 | 5     | 1360 | 18 | 1059 | 12 | 918  | 10 | 671  | 10 | 15.35948 | 32.5     | 918  | 10 |
| O6-112 | 0.074 | 0.002 | 1.58  | 0.042 | 0.156 | 0.002 | 0.047 | 5E-04 | 1.43  | 1028 | 60 | 962  | 17 | 934  | 10 | 929  | 10 | 2.997859 | 9.143969 | 934  | 10 |
| O6-07  | 0.079 | 0.001 | 1.731 | 0.027 | 0.158 | 0.002 | 0.047 | 5E-04 | 8.37  | 1179 | 37 | 1020 | 10 | 948  | 9  | 936  | 10 | 7.594937 | 19.59288 | 948  | 9  |
| O6-44  | 0.076 | 0.001 | 1.693 | 0.03  | 0.161 | 0.002 | 0.007 | 1E-04 | 3.74  | 1105 | 19 | 1006 | 11 | 962  | 10 | 134  | 3  | 4.573805 | 12.94118 | 962  | 10 |
| O6-90  | 0.088 | 0.002 | 1.981 | 0.041 | 0.164 | 0.002 | 0.025 | 4E-04 | 1.51  | 1372 | 20 | 1109 | 14 | 980  | 12 | 500  | 7  | 13.16327 | 28.57143 | 980  | 12 |
| O6-138 | 0.078 | 0.002 | 1.991 | 0.033 | 0.184 | 0.002 | 0.055 | 5E-04 | 7.29  | 1155 | 39 | 1112 | 11 | 1091 | 10 | 1087 | 10 | 1.92484  | 5.541126 | 1155 | 39 |
| O6-196 | 0.079 | 0.001 | 1.889 | 0.036 | 0.173 | 0.002 | 0.031 | 5E-04 | 2.73  | 1173 | 18 | 1077 | 13 | 1031 | 13 | 614  | 9  | 4.461688 | 12.10571 | 1173 | 18 |
| O6-98  | 0.081 | 0.003 | 2.073 | 0.071 | 0.185 | 0.003 | 0.055 | 8E-04 | 5.95  | 1233 | 76 | 1140 | 24 | 1092 | 15 | 1083 | 15 | 4.395604 | 11.43552 | 1233 | 76 |
| O6-02  | 0.091 | 0.003 | 3.042 | 0.106 | 0.241 | 0.003 | 0.071 | 8E-04 | 1.36  | 1457 | 72 | 1418 | 27 | 1393 | 16 | 1388 | 16 | 1.794688 | 4.392588 | 1457 | 72 |
| O6-163 | 0.093 | 0.002 | 2.868 | 0.058 | 0.224 | 0.003 | 0.067 | 0.001 | 1.64  | 1485 | 19 | 1374 | 15 | 1303 | 17 | 1305 | 19 | 5.448964 | 12.25589 | 1485 | 19 |
| O6-18  | 0.104 | 0.002 | 3.57  | 0.056 | 0.25  | 0.003 | 0.045 | 9E-04 | 8.38  | 1689 | 15 | 1543 | 12 | 1438 | 13 | 895  | 16 | 7.301808 | 14.86086 | 1689 | 15 |
| O6-140 | 0.111 | 0.002 | 4.211 | 0.061 | 0.276 | 0.003 | 0.083 | 0.003 | 243.2 | 1813 | 13 | 1676 | 12 | 1569 | 13 | 1606 | 55 | 6.81963  | 13.45836 | 1813 | 13 |
| O6-158 | 0.125 | 0.002 | 5.265 | 0.1   | 0.304 | 0.004 | 0.082 | 0.001 | 8.93  | 2035 | 16 | 1863 | 16 | 1713 | 21 | 1585 | 23 | 8.756567 | 15.8231  | 2035 | 16 |
| O6-177 | 0.167 | 0.003 | 9.235 | 0.186 | 0.401 | 0.006 | 0.08  | 0.001 | 0.63  | 2527 | 16 | 2362 | 18 | 2175 | 27 | 1562 | 23 | 8.597701 | 13.92956 | 2527 | 16 |
| O6-62  | 0.206 | 0.003 | 12.74 | 0.217 | 0.45  | 0.005 | 0.09  | 0.001 | 5.61  | 2871 | 13 | 2661 | 16 | 2394 | 24 | 1746 | 25 | 11.15288 | 16.61442 | 2871 | 13 |
| O6-168 | 0.243 | 0.004 | 16.95 | 0.321 | 0.506 | 0.007 | 0.024 | 6E-04 | 6.04  | 3138 | 14 | 2932 | 18 | 2641 | 31 | 479  | 13 | 11.01855 | 15.83811 | 3138 | 14 |
| O6-162 | 0.26  | 0.004 | 19.24 | 0.332 | 0.536 | 0.007 | 0.14  | 0.002 | 0.65  | 3249 | 12 | 3054 | 17 | 2766 | 31 | 2655 | 34 | 10.41215 | 14.86611 | 3249 | 12 |

Table DR11 Raw data of zircon U-Pb ages of sample 731C-17R-2W

| Grain  | Apparent Ages (Ma)                      |       |                                        |       |                                        |       |                                         |       |       |                                         | Corr.% discordant |                                        |    |                                        | Best Age<br>(Ma) | 1σ                                      |     |                                |                                |      |     |
|--------|-----------------------------------------|-------|----------------------------------------|-------|----------------------------------------|-------|-----------------------------------------|-------|-------|-----------------------------------------|-------------------|----------------------------------------|----|----------------------------------------|------------------|-----------------------------------------|-----|--------------------------------|--------------------------------|------|-----|
|        | <sup>207</sup> Pb/<br><sup>206</sup> Pb | 1σ    | <sup>207</sup> Pb/<br><sup>235</sup> U | 1σ    | <sup>206</sup> Pb/<br><sup>238</sup> U | 1σ    | <sup>208</sup> Pb/<br><sup>232</sup> Th | 1σ    | U/Th  | <sup>207</sup> Pb/<br><sup>206</sup> Pb | 1σ                | <sup>207</sup> Pb/<br><sup>235</sup> U | 1σ | <sup>206</sup> Pb/<br><sup>238</sup> U | 1σ               | <sup>208</sup> Pb/<br><sup>232</sup> Th | 1σ  | <sup>206</sup> /238<br>207/235 | <sup>207</sup> /206<br>206/238 |      |     |
|        |                                         |       |                                        |       |                                        |       |                                         |       |       |                                         |                   |                                        |    |                                        |                  |                                         |     |                                |                                |      |     |
| O7-194 | 0.046                                   | 0.005 | 0.029                                  | 0.003 | 0.005                                  | 1E-04 | 0.003                                   | 0.005 | 118.7 |                                         | 209               | 29                                     | 3  | 29.4                                   | 0.8              | 56                                      | 109 | -1.360544                      | \                              | 29.4 | 0.8 |
| O7-99  | 0.046                                   | 0.002 | 0.033                                  | 0.001 | 0.005                                  | 8E-05 | 0.008                                   | 0.004 | 76.84 |                                         | 74                | 33                                     | 1  | 33.4                                   | 0.5              | 153                                     | 84  | -1.197605                      | \                              | 33.4 | 0.5 |
| O7-51  | 0.053                                   | 0.005 | 0.053                                  | 0.005 | 0.007                                  | 2E-04 | 0.012                                   | 0.001 | 74.32 | 346                                     | 154               | 52                                     | 4  | 46                                     | 1                | 232                                     | 27  | 13.04348                       | 86.7052                        | 46   | 1   |
| O7-119 | 0.054                                   | 0.004 | 0.056                                  | 0.004 | 0.008                                  | 1E-04 | 0.002                                   | 4E-05 | 0.69  | 378                                     | 114               | 55                                     | 3  | 48.2                                   | 0.8              | 41.2                                    | 0.8 | 14.10788                       | 87.24868                       | 48.2 | 0.8 |
| O7-28  | 0.05                                    | 0.001 | 0.059                                  | 0.001 | 0.009                                  | 1E-04 | 0.003                                   | 4E-05 | 1.41  | 213                                     | 31                | 59                                     | 1  | 54.8                                   | 0.8              | 50.5                                    | 0.8 | 7.664234                       | 74.2723                        | 54.8 | 0.8 |
| O7-78  | 0.052                                   | 0.002 | 0.07                                   | 0.003 | 0.01                                   | 2E-04 | 0.003                                   | 9E-05 | 3.53  | 300                                     | 65                | 68                                     | 3  | 62                                     | 1                | 62                                      | 2   | 9.677419                       | 79.33333                       | 62   | 1   |
| O7-200 | 0.049                                   | 0.002 | 0.069                                  | 0.003 | 0.01                                   | 2E-04 | 0.003                                   | 7E-05 | 1.49  | 151                                     | 75                | 68                                     | 3  | 65                                     | 1                | 66                                      | 1   | 4.615385                       | 56.95364                       | 65   | 1   |
| O7-82  | 0.055                                   | 0.002 | 0.078                                  | 0.003 | 0.01                                   | 1E-04 | 0.003                                   | 5E-05 | 0.84  | 401                                     | 65                | 77                                     | 3  | 66.6                                   | 0.8              | 63                                      | 1   | 15.61562                       | 83.39152                       | 66.6 | 0.8 |
| O7-29  | 0.052                                   | 0.003 | 0.076                                  | 0.004 | 0.011                                  | 2E-04 | 0.004                                   | 1E-04 | 2.46  | 264                                     | 98                | 75                                     | 4  | 69                                     | 1                | 74                                      | 2   | 8.695652                       | 73.86364                       | 69   | 1   |
| O7-195 | 0.047                                   | 0.004 | 0.07                                   | 0.006 | 0.011                                  | 2E-04 | 0.003                                   | 1E-04 | 1.68  | 49                                      | 180               | 68                                     | 5  | 69                                     | 1                | 69                                      | 2   | -1.449275                      | -40.81633                      | 69   | 1   |
| O7-89  | 0.052                                   | 0.001 | 0.079                                  | 0.002 | 0.011                                  | 1E-04 | 0.003                                   | 4E-05 | 0.85  | 277                                     | 36                | 77                                     | 2  | 71.2                                   | 0.8              | 62.8                                    | 0.8 | 8.146067                       | 74.29603                       | 71.2 | 0.8 |
| O7-81  | 0.051                                   | 0.003 | 0.088                                  | 0.004 | 0.013                                  | 2E-04 | 0.004                                   | 7E-05 | 1.03  | 244                                     | 85                | 86                                     | 4  | 80                                     | 1                | 71                                      | 1   | 7.5                            | 67.21311                       | 80   | 1   |
| O7-117 | 0.053                                   | 0.002 | 0.096                                  | 0.004 | 0.013                                  | 2E-04 | 0.004                                   | 5E-05 | 7.92  | 345                                     | 103               | 93                                     | 4  | 83.5                                   | 1                | 82.3                                    | 0.9 | 11.37725                       | 75.7971                        | 83.5 | 1   |
| O7-144 | 0.055                                   | 0.004 | 0.099                                  | 0.007 | 0.013                                  | 3E-04 | 0.003                                   | 1E-04 | 1.5   | 407                                     | 121               | 96                                     | 6  | 84                                     | 2                | 63                                      | 2   | 14.28571                       | 79.36118                       | 84   | 2   |
| O7-123 | 0.051                                   | 0.002 | 0.094                                  | 0.004 | 0.013                                  | 2E-04 | 0.004                                   | 6E-05 | 0.89  | 258                                     | 67                | 91                                     | 3  | 85                                     | 1                | 72                                      | 1   | 7.058824                       | 67.05426                       | 85   | 1   |
| O7-108 | 0.052                                   | 0.002 | 0.1                                    | 0.003 | 0.014                                  | 2E-04 | 0.004                                   | 7E-05 | 1.81  | 296                                     | 43                | 97                                     | 3  | 88.9                                   | 1                | 84                                      | 1   | 9.111361                       | 69.96622                       | 88.9 | 1   |
| O7-65  | 0.055                                   | 0.002 | 0.106                                  | 0.003 | 0.014                                  | 2E-04 | 0.004                                   | 6E-05 | 0.19  | 427                                     | 43                | 102                                    | 3  | 89                                     | 1                | 87                                      | 1   | 14.60674                       | 79.15691                       | 89   | 1   |
| O7-40  | 0.051                                   | 0.004 | 0.101                                  | 0.008 | 0.014                                  | 3E-04 | 0.005                                   | 5E-04 | 12.78 | 227                                     | 136               | 97                                     | 7  | 92                                     | 2                | 110                                     | 9   | 5.434783                       | 59.47137                       | 92   | 2   |
| O7-33  | 0.055                                   | 0.002 | 0.111                                  | 0.004 | 0.015                                  | 2E-04 | 0.005                                   | 8E-05 | 1.26  | 405                                     | 46                | 107                                    | 3  | 94                                     | 1                | 95                                      | 2   | 13.82979                       | 76.79012                       | 94   | 1   |
| O7-198 | 0.051                                   | 0.004 | 0.102                                  | 0.008 | 0.015                                  | 3E-04 | 0.005                                   | 8E-05 | 2.96  | 225                                     | 179               | 99                                     | 7  | 94                                     | 2                | 93                                      | 2   | 5.319149                       | 58.22222                       | 94   | 2   |
| O7-148 | 0.05                                    | 0.002 | 0.103                                  | 0.004 | 0.015                                  | 2E-04 | 0.005                                   | 6E-05 | 5.06  | 199                                     | 92                | 99                                     | 3  | 95                                     | 1                | 95                                      | 1   | 4.210526                       | 52.26131                       | 95   | 1   |
| O7-106 | 0.054                                   | 0.004 | 0.117                                  | 0.008 | 0.016                                  | 2E-04 | 0.005                                   | 4E-05 | 0.84  | 375                                     | 159               | 112                                    | 7  | 100                                    | 1                | 98.9                                    | 0.8 | 12                             | 73.33333                       | 100  | 1   |
| O7-2   | 0.048                                   | 0.005 | 0.107                                  | 0.011 | 0.016                                  | 4E-04 | 0.005                                   | 2E-04 | 1.49  | 104                                     | 180               | 104                                    | 10 | 104                                    | 3                | 108                                     | 4   | 0                              | 0                              | 104  | 3   |
| O7-49  | 0.053                                   | 0.003 | 0.119                                  | 0.006 | 0.016                                  | 3E-04 | 0.005                                   | 1E-04 | 1.63  | 338                                     | 85                | 115                                    | 6  | 104                                    | 2                | 98                                      | 2   | 10.57692                       | 69.23077                       | 104  | 2   |
| O7-47  | 0.052                                   | 0.004 | 0.119                                  | 0.01  | 0.017                                  | 4E-04 | 0.005                                   | 2E-04 | 1.03  | 276                                     | 150               | 114                                    | 9  | 107                                    | 2                | 95                                      | 3   | 6.542056                       | 61.23188                       | 107  | 2   |
| O7-48  | 0.046                                   | 0.007 | 0.107                                  | 0.015 | 0.017                                  | 4E-04 | 6E-04                                   | 2E-04 | 0.17  |                                         | 259               | 104                                    | 14 | 108                                    | 3                | 13                                      | 5   | -3.703704                      | \                              | 108  | 3   |
| O7-34  | 0.052                                   | 0.004 | 0.137                                  | 0.009 | 0.019                                  | 3E-04 | 0.006                                   | 2E-04 | 7.77  | 270                                     | 163               | 131                                    | 8  | 123                                    | 2                | 122                                     | 3   | 6.504065                       | 54.44444                       | 123  | 2   |
| O7-69  | 0.049                                   | 0.002 | 0.156                                  | 0.005 | 0.023                                  | 3E-04 | 0.007                                   | 1E-04 | 7.07  | 170                                     | 80                | 147                                    | 4  | 146                                    | 2                | 146                                     | 2   | 0.684932                       | 14.11765                       | 146  | 2   |
| O7-131 | 0.049                                   | 0.002 | 0.168                                  | 0.005 | 0.025                                  | 3E-04 | 0.008                                   | 2E-04 | 74.08 | 144                                     | 81                | 158                                    | 5  | 158                                    | 2                | 159                                     | 4   | 0                              | -9.722222                      | 158  | 2   |
| O7-25  | 0.051                                   | 0.002 | 0.177                                  | 0.006 | 0.025                                  | 4E-04 | 0.008                                   | 1E-04 | 4.67  | 233                                     | 83                | 165                                    | 5  | 160                                    | 2                | 160                                     | 2   | 3.125                          | 31.33047                       | 160  | 2   |
| O7-188 | 0.053                                   | 0.001 | 0.19                                   | 0.005 | 0.026                                  | 4E-04 | 0.009                                   | 2E-04 | 3.05  | 325                                     | 36                | 177                                    | 4  | 166                                    | 2                | 188                                     | 3   | 6.626506                       | 48.92308                       | 166  | 2   |
| O7-27  | 0.051                                   | 0.002 | 0.204                                  | 0.005 | 0.029                                  | 4E-04 | 0.009                                   | 1E-04 | 5.81  | 247                                     | 70                | 188                                    | 5  | 184                                    | 2                | 183                                     | 2   | 2.173913                       | 25.50607                       | 184  | 2   |
| O7-31  | 0.058                                   | 0.002 | 0.27                                   | 0.011 | 0.034                                  | 5E-04 | 0.01                                    | 2E-04 | 1.59  | 523                                     | 62                | 243                                    | 9  | 215                                    | 3                | 203                                     | 4   | 13.02326                       | 58.89101                       | 215  | 3   |
| O7-4   | 0.053                                   | 8E-04 | 0.282                                  | 0.005 | 0.039                                  | 5E-04 | 0.008                                   | 1E-04 | 0.41  | 313                                     | 18                | 252                                    | 4  | 246                                    | 3                | 153                                     | 2   | 2.439024                       | 21.40575                       | 246  | 3   |
| O7-113 | 0.06                                    | 0.002 | 0.335                                  | 0.008 | 0.04                                   | 4E-04 | 0.01                                    | 1E-04 | 1.15  | 611                                     | 34                | 293                                    | 6  | 255                                    | 3                | 210                                     | 3   | 14.90196                       | 58.26514                       | 255  | 3   |
| O7-197 | 0.056                                   | 0.001 | 0.32                                   | 0.007 | 0.041                                  | 6E-04 | 0.012                                   | 2E-04 | 2.78  | 450                                     | 23                | 282                                    | 5  | 262                                    | 4                | 246                                     | 4   | 7.633588                       | 41.77778                       | 262  | 4   |
| O7-92  | 0.057                                   | 0.002 | 0.335                                  | 0.009 | 0.042                                  | 5E-04 | 0.013                                   | 3E-04 | 21.55 | 508                                     | 68                | 294                                    | 7  | 267                                    | 3                | 264                                     | 5   | 10.11236                       | 47.44094                       | 267  | 3   |
| O7-124 | 0.058                                   | 0.001 | 0.413                                  | 0.009 | 0.052                                  | 6E-04 | 0.013                                   | 3E-04 | 6.54  | 524                                     | 28                | 351                                    | 6  | 326                                    | 3                | 263                                     | 5   | 7.668712                       | 37.78626                       | 326  | 3   |
| O7-59  | 0.064                                   | 0.002 | 0.508                                  | 0.018 | 0.058                                  | 9E-04 | 0.031                                   | 8E-04 | 4.99  | 727                                     | 50                | 417                                    | 12 | 364                                    | 6                | 625                                     | 15  | 14.56044                       | 49.93122                       | 364  | 6   |
| O7-70  | 0.06                                    | 0.001 | 0.511                                  | 0.011 | 0.062                                  | 9E-04 | 0.017                                   | 3E-04 | 1.94  | 611                                     | 23                | 419                                    | 7  | 385                                    | 5                | 347                                     | 5   | 8.831169                       | 36.98854                       | 385  | 5   |
| O7-74  | 0.058                                   | 0.001 | 0.491                                  | 0.009 | 0.062                                  | 8E-04 | 0.019                                   | 3E-04 | 21.09 | 527                                     | 51                | 406                                    | 6  | 385                                    | 5                | 382                                     | 5   | 5.454545                       | 26.94497                       | 385  | 5   |
| O7-3   | 0.046                                   | 0.007 | 0.41                                   | 0.061 | 0.065                                  | 0.001 | 0.039                                   | 0.004 | 1     |                                         | 272               | 349                                    | 44 | 404                                    | 8                | 781                                     | 82  | -13.61386                      |                                | 404  | 8   |
| O7-58  | 0.058                                   | 0.001 | 0.549                                  | 0.011 | 0.068                                  | 9E-04 | 0.021                                   | 4E-04 | 35.84 | 537                                     | 55                | 444                                    | 7  | 427                                    | 6                | 424                                     | 7   | 3.981265                       | 20.48417                       | 427  | 6   |
| O7-183 | 0.054                                   | 9E-04 | 0.515                                  | 0.009 | 0.069                                  | 9E-04 | 0.019                                   | 3E-04 | 2.5   | 375                                     | 20                | 422                                    | 6  | 431                                    | 6                | 380                                     | 5   | -2.088167                      | -14.93333                      | 431  | 6   |
| O7-75  | 0.058                                   | 0.002 | 0.557                                  | 0.017 | 0.07                                   | 0.001 | 0.017                                   | 3E-04 | 1.33  | 519                                     | 40                | 449                                    | 11 | 436                                    | 6                | 348                                     | 6   | 2.981651                       | 15.99229                       | 436  | 6   |
| O7-84  | 0.06                                    | 8E-04 | 0.593                                  | 0.008 | 0.072                                  | 7E-04 | 0.02                                    | 2E-04 | 1.31  | 606                                     | 13                | 473                                    | 5  | 445                                    | 4                | 394                                     | 4   | 6.292135                       | 26.56766                       | 445  | 4   |
| O7-115 | 0.063                                   | 0.001 | 0.626                                  | 0.013 | 0.072                                  | 7E-04 | 0.006                                   | 2E-04 | 7.26  | 700                                     | 26                | 493                                    | 8  | 450                                    | 4                | 125                                     | 4   | 9.555556                       | 35.71429                       | 450  | 4   |
| O7-56  | 0.062                                   | 0.001 | 0.624                                  | 0.012 | 0.073                                  | 0.001 | 0.023                                   | 3E-04 | 3.37  | 671                                     | 19                | 492                                    | 7  | 455                                    | 6                | 456                                     | 7   | 8.131868                       | 32.19076                       | 455  | 6   |
| O7-109 | 0.064                                   | 0.001 | 0.653                                  | 0.011 | 0.074                                  | 7E-04 | 0.006                                   | 8E-05 | 0.8   | 753                                     | 20                | 510                                    | 7  | 458                                    | 4                | 121                                     | 2   | 11.35371                       | 39.17663                       | 458  | 4   |
| O7-182 | 0.055                                   | 8E-04 | 0.558                                  | 0.01  | 0.074                                  | 1E-03 | 0.023                                   | 4E-04 | 28.75 | 400                                     | 18                | 450                                    | 6  | 460                                    | 6                | 462                                     | 8   | -2.173913                      | -15                            | 460  | 6   |
| O7-154 | 0.059                                   | 0.001 | 0.61                                   | 0.015 | 0.074                                  | 0.001 | 0.021                                   | 4E-04 | 2.34  | 584                                     | 32                | 483                                    | 10 | 462                                    | 6                | 416                                     | 7   | 4.545455                       | 20.89041                       | 462  | 6   |
| O7-71  | 0.064                                   | 0.002 | 0.659                                  | 0.019 | 0.075                                  | 0.001 | 0.02                                    | 3E-04 | 0.58  | 735                                     | 36                | 514                                    | 12 | 466                                    | 7                | 398                                     | 6   | 10.30043                       | 36.59864                       | 466  | 7   |
| O7-172 | 0.059                                   | 0.002 | 0.612                                  | 0.021 | 0.076                                  | 0.001 | 0.022                                   | 3E-04 | 0.55  | 553                                     | 49                | 485                                    | 13 | 471                                    | 7                | 435                                     | 6   | 2.972399                       | 14.82821                       | 471  | 7   |
| O7-79  | 0.06                                    | 0.001 | 0.632                                  | 0.013 | 0.076                                  | 0.001 | 0.024                                   | 4E-04 | 1.38  | 611                                     | 21                | 498                                    | 8  | 473                                    | 6                | 481                                     | 7   | 5.285412                       | 22.58592                       | 473  | 6   |
| O7-13  | 0.06                                    | 0.001 | 0.642                                  | 0.013 | 0.077                                  | 0.001 | 0.008                                   | 2E-04 | 7.48  | 616                                     | 21                | 504                                    | 8  | 479                                    | 6                | 165                                     | 4   | 5.219207                       | 22.24026                       | 479  | 6   |
| O7-62  | 0.061                                   | 0.001 | 0.674                                  | 0.015 | 0.08                                   | 0.001 | 0.011                                   | 2E-04 | 1.41  | 653                                     | 25                | 523                                    | 9  | 494                                    | 7                | 231                                     | 4   | 5.870445                       | 24.34916                       | 494  | 7   |
| O7-169 | 0.058                                   | 0.005 | 0.662                                  | 0.051 | 0.083                                  | 0.002 | 0.062                                   | 0.006 | 21.22 | 535                                     | 131               | 516                                    | 31 | 512                                    | 11               | 1225                                    | 109 | 0.78125                        | 4.299065                       | 512  | 11  |
| O7-50  | 0.058                                   | 0.002 | 0.681                                  | 0.018 | 0.085                                  | 0.001 | 0.026                                   | 4E-04 | 10.94 | 544                                     | 66                | 528                                    | 11 | 524                                    | 7                | 523                                     | 8   | 0.763359                       | 3.676471                       | 524  | 7   |
| O7-55  | 0.067                                   | 0.001 | 0.781                                  | 0.018 | 0.085                                  | 0.001 | 0.023                                   | 4E-04 | 1.98  | 832                                     | 25                | 586                                    | 10 | 524                                    | 7                | 462                                     | 7   | 11.83206                       | 37.01923                       | 524  | 7   |
| O7-177 |                                         |       |                                        |       |                                        |       |                                         |       |       |                                         |                   |                                        |    |                                        |                  |                                         |     |                                |                                |      |     |

|        |       |       |       |       |       |       |       |       |       |      |    |      |    |      |    |      |    |          |          |      |    |
|--------|-------|-------|-------|-------|-------|-------|-------|-------|-------|------|----|------|----|------|----|------|----|----------|----------|------|----|
| O7-181 | 0.071 | 0.001 | 1.574 | 0.03  | 0.16  | 0.002 | 0.046 | 7E-04 | 5.14  | 963  | 19 | 960  | 12 | 959  | 12 | 906  | 14 | 0.104275 | 0.415369 | 959  | 12 |
| O7-147 | 0.083 | 0.001 | 1.845 | 0.036 | 0.161 | 0.002 | 0.046 | 7E-04 | 2.23  | 1267 | 19 | 1061 | 13 | 964  | 12 | 914  | 13 | 10.06224 | 23.91476 | 964  | 12 |
| O7-160 | 0.087 | 0.002 | 1.955 | 0.045 | 0.162 | 0.002 | 0.049 | 8E-04 | 1.93  | 1369 | 24 | 1100 | 15 | 969  | 12 | 968  | 16 | 13.51909 | 29.21841 | 969  | 12 |
| O7-83  | 0.076 | 0.003 | 1.711 | 0.054 | 0.163 | 0.002 | 0.049 | 5E-04 | 1.13  | 1105 | 68 | 1013 | 20 | 971  | 10 | 964  | 9  | 4.325438 | 12.1267  | 971  | 10 |
| O7-1   | 0.091 | 0.003 | 2.094 | 0.059 | 0.167 | 0.002 | 0.049 | 7E-04 | 2.15  | 1451 | 62 | 1147 | 19 | 993  | 14 | 969  | 13 | 15.50856 | 31.56444 | 993  | 14 |
| O7-196 | 0.088 | 0.002 | 2.037 | 0.048 | 0.167 | 0.002 | 0.045 | 7E-04 | 1.19  | 1388 | 24 | 1128 | 16 | 998  | 13 | 883  | 14 | 13.02605 | 28.09798 | 998  | 13 |
| O7-114 | 0.086 | 0.001 | 1.987 | 0.029 | 0.168 | 0.002 | 0.031 | 5E-04 | 12.71 | 1339 | 15 | 1111 | 10 | 999  | 9  | 625  | 10 | 11.21121 | 25.39208 | 999  | 9  |
| O7-185 | 0.082 | 0.001 | 2.148 | 0.038 | 0.19  | 0.003 | 0.051 | 7E-04 | 1.41  | 1241 | 16 | 1164 | 12 | 1124 | 14 | 1006 | 13 | 3.558719 | 9.427881 | 1241 | 16 |
| O7-142 | 0.085 | 0.002 | 2.341 | 0.051 | 0.201 | 0.003 | 0.06  | 7E-04 | 3.72  | 1305 | 50 | 1225 | 16 | 1180 | 14 | 1172 | 14 | 3.813559 | 9.578544 | 1305 | 50 |
| O7-14  | 0.097 | 0.002 | 3.039 | 0.057 | 0.228 | 0.003 | 0.054 | 8E-04 | 0.84  | 1561 | 17 | 1417 | 14 | 1324 | 17 | 1054 | 14 | 7.024169 | 15.18258 | 1561 | 17 |
| O7-103 | 0.105 | 0.002 | 3.657 | 0.051 | 0.253 | 0.002 | 0.052 | 7E-04 | 3.3   | 1713 | 13 | 1562 | 11 | 1453 | 12 | 1023 | 13 | 7.501721 | 15.17805 | 1713 | 13 |
| O7-153 | 0.11  | 0.002 | 4.128 | 0.08  | 0.271 | 0.004 | 0.062 | 0.001 | 7.56  | 1807 | 18 | 1660 | 16 | 1546 | 18 | 1220 | 19 | 7.373868 | 14.44383 | 1807 | 18 |
| O7-80  | 0.129 | 0.002 | 6.251 | 0.125 | 0.35  | 0.005 | 0.089 | 0.001 | 2.39  | 2091 | 17 | 2012 | 17 | 1936 | 24 | 1727 | 27 | 3.92562  | 7.412721 | 2091 | 17 |
| O7-88  | 0.165 | 0.002 | 9.449 | 0.122 | 0.416 | 0.004 | 0.11  | 0.001 | 1.28  | 2504 | 10 | 2383 | 12 | 2243 | 18 | 2114 | 21 | 6.241641 | 10.42332 | 2504 | 10 |
| O7-105 | 0.168 | 0.002 | 9.434 | 0.121 | 0.408 | 0.004 | 0.106 | 0.001 | 1.9   | 2535 | 11 | 2381 | 12 | 2206 | 17 | 2035 | 20 | 7.93291  | 12.9783  | 2535 | 11 |
| O7-136 | 0.168 | 0.003 | 9.444 | 0.165 | 0.408 | 0.005 | 0.101 | 0.001 | 4.43  | 2535 | 14 | 2382 | 16 | 2208 | 24 | 1948 | 25 | 7.880435 | 12.89941 | 2535 | 14 |
| O7-127 | 0.172 | 0.003 | 9.681 | 0.168 | 0.408 | 0.004 | 0.05  | 7E-04 | 0.9   | 2579 | 15 | 2405 | 16 | 2204 | 20 | 982  | 13 | 9.119782 | 14.54052 | 2579 | 15 |
| O7-87  | 0.201 | 0.003 | 13.81 | 0.172 | 0.499 | 0.005 | 0.094 | 1E-03 | 1.28  | 2833 | 9  | 2737 | 12 | 2607 | 20 | 1808 | 18 | 4.986575 | 7.977409 | 2833 | 9  |

Table DR11 Raw data of zircon U-Pb ages of sample 731C-22R-1W

| Grain  | Apparent Ages (Ma)                      |       |                                        |       |                                        |       |                                         |       |       |                                         | Corr.% discordant |                                        |     |                                        |     | Best Age<br>(Ma)                        | 1σ  |                                            |                                            |      |     |
|--------|-----------------------------------------|-------|----------------------------------------|-------|----------------------------------------|-------|-----------------------------------------|-------|-------|-----------------------------------------|-------------------|----------------------------------------|-----|----------------------------------------|-----|-----------------------------------------|-----|--------------------------------------------|--------------------------------------------|------|-----|
|        | <sup>207</sup> Pb/<br><sup>206</sup> Pb | 1σ    | <sup>207</sup> Pb/<br><sup>235</sup> U | 1σ    | <sup>206</sup> Pb/<br><sup>238</sup> U | 1σ    | <sup>208</sup> Pb/<br><sup>232</sup> Th | 1σ    | U/Th  | <sup>207</sup> Pb/<br><sup>206</sup> Pb | 1σ                | <sup>207</sup> Pb/<br><sup>235</sup> U | 1σ  | <sup>206</sup> Pb/<br><sup>238</sup> U | 1σ  | <sup>208</sup> Pb/<br><sup>232</sup> Th | 1σ  | <sup>206</sup> /238<br><sup>207</sup> /235 | <sup>207</sup> /206<br><sup>206</sup> /238 |      |     |
|        |                                         |       |                                        |       |                                        |       |                                         |       |       |                                         |                   |                                        |     |                                        |     |                                         |     |                                            |                                            |      |     |
| O8-193 | 0.05                                    | 0.004 | 0.04                                   | 0.003 | 0.006                                  | 8E-05 | 0.002                                   | 2E-05 | 1.32  | 198                                     | 160               | 39                                     | 3   | 36.9                                   | 0.5 | 36.6                                    | 0.4 | 5.691057                                   | 81.36364                                   | 36.9 | 0.5 |
| O8-172 | 0.048                                   | 0.005 | 0.065                                  | 0.007 | 0.01                                   | 2E-04 | 0.003                                   | 8E-05 | 1.18  | 120                                     | 241               | 64                                     | 7   | 62                                     | 1   | 62                                      | 2   | 3.225806                                   | 48.33333                                   | 62   | 1   |
| O8-187 | 0.052                                   | 0.002 | 0.071                                  | 0.002 | 0.01                                   | 1E-04 | 0.003                                   | 5E-05 | 1.31  | 291                                     | 46                | 70                                     | 2   | 63.3                                   | 0.8 | 62                                      | 1   | 10.58452                                   | 78.24742                                   | 63.3 | 0.8 |
| O8-175 | 0.046                                   | 0.007 | 0.063                                  | 0.01  | 0.01                                   | 3E-04 | 0.004                                   | 4E-04 | 1.34  |                                         | 280               | 62                                     | 9   | 64                                     | 2   | 72                                      | 9   | -3.125                                     | \                                          | 64   | 2   |
| O8-22  | 0.049                                   | 0.002 | 0.069                                  | 0.003 | 0.01                                   | 1E-04 | 0.003                                   | 4E-05 | 0.43  | 146                                     | 75                | 67                                     | 3   | 65.3                                   | 0.9 | 58.1                                    | 0.8 | 2.603369                                   | 55.27397                                   | 65.3 | 0.9 |
| O8-43  | 0.05                                    | 0.002 | 0.071                                  | 0.002 | 0.01                                   | 1E-04 | 0.004                                   | 1E-04 | 6.63  | 194                                     | 48                | 70                                     | 2   | 66.1                                   | 0.9 | 79                                      | 2   | 5.900151                                   | 65.92784                                   | 66.1 | 0.9 |
| O8-179 | 0.054                                   | 0.011 | 0.081                                  | 0.016 | 0.011                                  | 5E-04 | 0.047                                   | 0.011 | 115.9 | 381                                     | 342               | 79                                     | 15  | 69                                     | 3   | 935                                     | 213 | 14.49275                                   | 81.88976                                   | 69   | 3   |
| O8-90  | 0.05                                    | 1E-03 | 0.077                                  | 0.002 | 0.011                                  | 2E-04 | 0.003                                   | 5E-05 | 5.78  | 213                                     | 22                | 75                                     | 1   | 71                                     | 1   | 62                                      | 1   | 5.633803                                   | 66.66667                                   | 71   | 1   |
| O8-97  | 0.051                                   | 0.003 | 0.079                                  | 0.004 | 0.011                                  | 2E-04 | 0.004                                   | 4E-05 | 3.45  | 231                                     | 127               | 77                                     | 4   | 72                                     | 1   | 71.4                                    | 0.9 | 6.944444                                   | 68.83117                                   | 72   | 1   |
| O8-194 | 0.048                                   | 0.004 | 0.075                                  | 0.006 | 0.011                                  | 2E-04 | 0.004                                   | 7E-05 | 1.22  | 77                                      | 177               | 74                                     | 5   | 73                                     | 1   | 73                                      | 1   | 1.369863                                   | 5.194805                                   | 73   | 1   |
| O8-130 | 0.051                                   | 0.002 | 0.082                                  | 0.003 | 0.012                                  | 2E-04 | 0.003                                   | 5E-05 | 0.67  | 219                                     | 68                | 80                                     | 3   | 75                                     | 1   | 59                                      | 1   | 6.666667                                   | 65.75342                                   | 75   | 1   |
| O8-157 | 0.054                                   | 0.008 | 0.089                                  | 0.014 | 0.012                                  | 3E-04 | 0.004                                   | 8E-05 | 1.21  | 389                                     | 335               | 87                                     | 13  | 76                                     | 2   | 75                                      | 2   | 14.47368                                   | 80.46272                                   | 76   | 2   |
| O8-197 | 0.053                                   | 0.004 | 0.091                                  | 0.007 | 0.012                                  | 2E-04 | 0.004                                   | 6E-05 | 2.61  | 330                                     | 192               | 88                                     | 7   | 79                                     | 1   | 78                                      | 1   | 11.39241                                   | 76.06061                                   | 79   | 1   |
| O8-106 | 0.053                                   | 0.002 | 0.092                                  | 0.003 | 0.013                                  | 2E-04 | 0.005                                   | 7E-05 | 1.66  | 326                                     | 52                | 90                                     | 3   | 81                                     | 1   | 75                                      | 1   | 11.11111                                   | 75.15337                                   | 81   | 1   |
| O8-87  | 0.05                                    | 0.002 | 0.089                                  | 0.004 | 0.013                                  | 2E-04 | 0.004                                   | 5E-05 | 4.21  | 175                                     | 114               | 86                                     | 4   | 83                                     | 1   | 83                                      | 1   | 3.614458                                   | 52.57143                                   | 83   | 1   |
| O8-66  | 0.053                                   | 0.007 | 0.097                                  | 0.012 | 0.013                                  | 4E-04 | 0.004                                   | 2E-04 | 1.2   | 343                                     | 218               | 94                                     | 11  | 84                                     | 3   | 71                                      | 3   | 11.90476                                   | 75.5102                                    | 84   | 3   |
| O8-86  | 0.046                                   | 0.004 | 0.087                                  | 0.007 | 0.014                                  | 3E-04 | 0.005                                   | 7E-04 | 5.91  |                                         | 173               | 85                                     | 6   | 88                                     | 2   | 93                                      | 13  | -3.409091                                  | \                                          | 88   | 2   |
| O8-16  | 0.046                                   | 0.006 | 0.088                                  | 0.012 | 0.014                                  | 3E-04 | 0.004                                   | 2E-04 | 1.32  | 1                                       | 249               | 86                                     | 11  | 89                                     | 2   | 89                                      | 5   | -3.370787                                  | -8800                                      | 89   | 2   |
| O8-73  | 0.05                                    | 0.002 | 0.1                                    | 0.004 | 0.015                                  | 2E-04 | 0.005                                   | 1E-04 | 2.99  | 185                                     | 68                | 97                                     | 4   | 93                                     | 1   | 98                                      | 2   | 4.301075                                   | 49.72973                                   | 93   | 1   |
| O8-168 | 0.054                                   | 0.005 | 0.109                                  | 0.01  | 0.015                                  | 3E-04 | 0.005                                   | 6E-05 | 1.52  | 357                                     | 218               | 105                                    | 9   | 94                                     | 2   | 93                                      | 1   | 11.70213                                   | 73.66947                                   | 94   | 2   |
| O8-42  | 0.052                                   | 0.003 | 0.106                                  | 0.006 | 0.015                                  | 2E-04 | 0.005                                   | 6E-05 | 2.58  | 281                                     | 142               | 102                                    | 6   | 95                                     | 1   | 94                                      | 1   | 7.368421                                   | 66.19217                                   | 95   | 1   |
| O8-112 | 0.052                                   | 0.002 | 0.108                                  | 0.005 | 0.015                                  | 2E-04 | 0.006                                   | 2E-04 | 4.45  | 295                                     | 71                | 104                                    | 4   | 96                                     | 1   | 128                                     | 4   | 8.333333                                   | 67.45763                                   | 96   | 1   |
| O8-184 | 0.052                                   | 0.008 | 0.108                                  | 0.016 | 0.015                                  | 5E-04 | 0.004                                   | 3E-04 | 1.52  | 294                                     | 267               | 105                                    | 15  | 96                                     | 3   | 87                                      | 6   | 9.375                                      | 67.34694                                   | 96   | 3   |
| O8-140 | 0.046                                   | 0.004 | 0.096                                  | 0.008 | 0.015                                  | 3E-04 | 0.006                                   | 9E-04 | 1.43  |                                         | 183               | 93                                     | 7   | 97                                     | 2   | 128                                     | 17  | -4.123711                                  | \                                          | 97   | 2   |
| O8-178 | 0.055                                   | 0.009 | 0.116                                  | 0.019 | 0.015                                  | 4E-04 | 0.005                                   | 4E-04 | 3.94  | 412                                     | 357               | 111                                    | 17  | 97                                     | 2   | 96                                      | 7   | 14.43299                                   | 76.45631                                   | 97   | 2   |
| O8-27  | 0.046                                   | 0.021 | 0.098                                  | 0.045 | 0.016                                  | 5E-04 | 0.01                                    | 0.006 | 4.76  |                                         | 764               | 95                                     | 41  | 99                                     | 3   | 203                                     | 123 | -4.040404                                  | \                                          | 99   | 3   |
| O8-67  | 0.053                                   | 0.003 | 0.12                                   | 0.007 | 0.016                                  | 3E-04 | 0.004                                   | 1E-04 | 2.72  | 330                                     | 91                | 115                                    | 6   | 105                                    | 2   | 80                                      | 3   | 9.52381                                    | 68.18182                                   | 105  | 2   |
| O8-118 | 0.051                                   | 0.001 | 0.123                                  | 0.003 | 0.018                                  | 2E-04 | 0.005                                   | 6E-05 | 0.65  | 245                                     | 30                | 118                                    | 3   | 112                                    | 1   | 91                                      | 1   | 5.357143                                   | 54.28571                                   | 112  | 1   |
| O8-19  | 0.052                                   | 0.001 | 0.15                                   | 0.004 | 0.021                                  | 2E-04 | 0.012                                   | 3E-04 | 11.56 | 279                                     | 37                | 142                                    | 3   | 134                                    | 2   | 241                                     | 5   | 5.970149                                   | 51.97133                                   | 134  | 2   |
| O8-62  | 0.05                                    | 0.002 | 0.152                                  | 0.006 | 0.022                                  | 3E-04 | 0.007                                   | 1E-04 | 19.96 | 188                                     | 100               | 144                                    | 5   | 141                                    | 2   | 141                                     | 2   | 2.12766                                    | 25                                         | 141  | 2   |
| O8-155 | 0.052                                   | 0.002 | 0.164                                  | 0.008 | 0.023                                  | 3E-04 | 0.007                                   | 1E-04 | 10.69 | 277                                     | 113               | 154                                    | 7   | 146                                    | 2   | 145                                     | 2   | 5.479452                                   | 47.29242                                   | 146  | 2   |
| O8-198 | 0.053                                   | 9E-04 | 0.181                                  | 0.003 | 0.025                                  | 3E-04 | 0.009                                   | 1E-04 | 1.78  | 341                                     | 20                | 169                                    | 3   | 157                                    | 2   | 173                                     | 2   | 7.643312                                   | 53.95894                                   | 157  | 2   |
| O8-48  | 0.05                                    | 0.002 | 0.171                                  | 0.005 | 0.025                                  | 3E-04 | 0.008                                   | 1E-04 | 29.85 | 198                                     | 81                | 161                                    | 5   | 158                                    | 2   | 158                                     | 2   | 1.898734                                   | 20.20202                                   | 158  | 2   |
| O8-96  | 0.053                                   | 0.002 | 0.183                                  | 0.005 | 0.025                                  | 3E-04 | 0.008                                   | 9E-05 | 4.26  | 311                                     | 75                | 171                                    | 5   | 161                                    | 2   | 160                                     | 2   | 6.21118                                    | 48.23151                                   | 161  | 2   |
| O8-137 | 0.051                                   | 0.001 | 0.189                                  | 0.005 | 0.027                                  | 4E-04 | 0.008                                   | 1E-04 | 19.7  | 248                                     | 65                | 176                                    | 4   | 171                                    | 2   | 170                                     | 2   | 2.923977                                   | 31.04839                                   | 171  | 2   |
| O8-63  | 0.054                                   | 0.003 | 0.205                                  | 0.01  | 0.028                                  | 5E-04 | 0.011                                   | 3E-04 | 2.43  | 356                                     | 80                | 189                                    | 8   | 176                                    | 3   | 213                                     | 5   | 7.386364                                   | 50.5618                                    | 176  | 3   |
| O8-20  | 0.052                                   | 0.001 | 0.201                                  | 0.004 | 0.028                                  | 3E-04 | 0.009                                   | 1E-04 | 1.39  | 270                                     | 30                | 186                                    | 4   | 180                                    | 2   | 172                                     | 2   | 3.333333                                   | 33.33333                                   | 180  | 2   |
| O8-47  | 0.052                                   | 1E-03 | 0.218                                  | 0.005 | 0.03                                   | 4E-04 | 0.009                                   | 2E-04 | 4.95  | 282                                     | 25                | 200                                    | 4   | 193                                    | 3   | 190                                     | 3   | 3.626943                                   | 31.56028                                   | 193  | 3   |
| O8-60  | 0.052                                   | 0.001 | 0.225                                  | 0.006 | 0.031                                  | 4E-04 | 0.01                                    | 1E-04 | 16.79 | 282                                     | 67                | 206                                    | 5   | 200                                    | 3   | 199                                     | 3   | 3                                          | 29.07801                                   | 200  | 3   |
| O8-119 | 0.053                                   | 0.001 | 0.245                                  | 0.006 | 0.034                                  | 4E-04 | 0.01                                    | 2E-04 | 2.23  | 316                                     | 30                | 223                                    | 5   | 214                                    | 3   | 200                                     | 3   | 4.205607                                   | 32.27848                                   | 214  | 3   |
| O8-05  | 0.052                                   | 0.001 | 0.265                                  | 0.005 | 0.037                                  | 4E-04 | 0.011                                   | 1E-04 | 1.99  | 296                                     | 27                | 239                                    | 4   | 233                                    | 2   | 215                                     | 3   | 2.575107                                   | 21.28378                                   | 233  | 2   |
| O8-95  | 0.056                                   | 0.002 | 0.301                                  | 0.011 | 0.039                                  | 6E-04 | 0.012                                   | 2E-04 | 24.3  | 441                                     | 87                | 267                                    | 8   | 248                                    | 3   | 246                                     | 4   | 7.66129                                    | 43.76417                                   | 248  | 3   |
| O8-91  | 0.06                                    | 0.002 | 0.334                                  | 0.009 | 0.041                                  | 6E-04 | 0.004                                   | 8E-05 | 1.5   | 595                                     | 34                | 293                                    | 7   | 256                                    | 3   | 76                                      | 2   | 14.45313                                   | 56.97479                                   | 256  | 3   |
| O8-181 | 0.058                                   | 0.002 | 0.326                                  | 0.011 | 0.041                                  | 6E-04 | 0.005                                   | 1E-04 | 1.16  | 527                                     | 52                | 286                                    | 9   | 258                                    | 3   | 92                                      | 2   | 10.85271                                   | 51.04364                                   | 258  | 3   |
| O8-09  | 0.061                                   | 0.002 | 0.385                                  | 0.013 | 0.046                                  | 6E-04 | 0.012                                   | 2E-04 | 1.63  | 632                                     | 51                | 331                                    | 9   | 290                                    | 3   | 233                                     | 5   | 14.13793                                   | 54.11392                                   | 290  | 3   |
| O8-121 | 0.058                                   | 0.002 | 0.404                                  | 0.011 | 0.05                                   | 6E-04 | 0.016                                   | 2E-04 | 5.29  | 539                                     | 68                | 344                                    | 8   | 316                                    | 4   | 312                                     | 3   | 8.860759                                   | 41.37291                                   | 316  | 4   |
| O8-45  | 0.053                                   | 0.003 | 0.381                                  | 0.022 | 0.052                                  | 8E-04 | 0.016                                   | 2E-04 | 1.02  | 342                                     | 139               | 328                                    | 16  | 326                                    | 5   | 326                                     | 4   | 0.613497                                   | 4.678363                                   | 326  | 5   |
| O8-04  | 0.046                                   | 0.006 | 0.357                                  | 0.044 | 0.056                                  | 0.001 | 0.029                                   | 0.005 | 1.62  |                                         | 239               | 310                                    | 33  | 353                                    | 6   | 585                                     | 105 | -12.1813                                   | \                                          | 353  | 6   |
| O8-15  | 0.059                                   | 9E-04 | 0.469                                  | 0.007 | 0.057                                  | 6E-04 | 0.016                                   | 2E-04 | 0.49  | 576                                     | 18                | 390                                    | 5   | 360                                    | 4   | 331                                     | 4   | 8.333333                                   | 37.5                                       | 360  | 4   |
| O8-89  | 0.057                                   | 0.002 | 0.459                                  | 0.014 | 0.059                                  | 8E-04 | 0.018                                   | 2E-04 | 18.51 | 483                                     | 76                | 383                                    | 10  | 367                                    | 5   | 365                                     | 5   | 4.359673                                   | 24.01656                                   | 367  | 5   |
| O8-125 | 0.046                                   | 0.039 | 0.386                                  | 0.328 | 0.061                                  | 0.002 | 0.042                                   | 0.01  | 0.7   |                                         | 1124              | 331                                    | 240 | 380                                    | 15  | 823                                     | 202 | -12.89474                                  | \                                          | 380  | 15  |
| O8-94  | 0.064                                   | 0.002 | 0.538                                  | 0.016 | 0.061                                  | 9E-04 | 0.015                                   | 3E-04 | 1.23  | 731                                     | 39                | 437                                    | 11  | 383                                    | 5   | 306                                     | 5   | 14.09922                                   | 47.60602                                   | 383  | 5   |
| O8-93  | 0.06                                    | 0.001 | 0.514                                  | 0.009 | 0.062                                  | 8E-04 | 0.004                                   | 6E-05 | 1.04  | 592                                     | 19                | 421                                    | 6   | 390                                    | 5   | 80                                      | 1   | 7.948718                                   | 34.12162                                   | 390  | 5   |
| O8-196 | 0.062                                   | 0.002 | 0.54                                   | 0.014 | 0.063                                  | 7E-04 | 0.014                                   | 2E-04 | 1.02  | 685                                     | 35                | 438                                    | 9   | 393                                    | 4   | 274                                     | 4   | 11.45038                                   | 42.62774                                   | 393  | 4   |
| O8-153 | 0.062                                   | 0.003 | 0.546                                  | 0.022 | 0.064                                  | 1E-03 | 0.02                                    | 4E-04 | 1.53  | 682                                     | 58                | 443                                    | 14  | 398                                    | 6   | 409                                     | 9   | 11.30653                                   | 41.64223                                   | 398  | 6   |
| O8-162 | 0.058                                   | 0.001 | 0.534                                  | 0.008 | 0.067                                  | 7E-04 | 0.021                                   | 2E-04 | 24.08 | 520                                     | 43                | 435                                    | 6   | 419                                    | 4   | 417                                     | 5   | 3.818616                                   | 19.42308                                   | 419  | 4   |
| O8-147 | 0.064                                   | 0.003 | 0.607                                  | 0.031 | 0.069                                  | 0.001 | 0.021                                   | 3E-04 | 5.14  | 742                                     | 116               | 482                                    | 19  | 429                                    | 7   | 422                                     | 6   | 12.35431                                   | 42.18329                                   | 429  | 7   |
| O8-41  | 0.056                                   | 0.001 | 0.53                                   | 0.014 | 0.069                                  | 9E-04 | 0.033                                   | 0.001 | 42.03 | 440                                     | 35                | 432                                    | 9   | 430                                    | 6   | 664                                     | 28  | 0.465116                                   | 2.272727                                   | 430  | 6   |
| O8-51  | 0.061                                   | 0.002 | 0.609                                  | 0.017 | 0.072                                  | 0.001 | 0.02                                    | 3E-04 | 0.95  | 649                                     | 37                | 483                                    | 11  | 448                                    | 6   | 395                                     | 6   | 7.8125                                     | 30.97072                                   | 448  | 6   |
| O8-77  | 0.062                                   | 0.001 | 0.63                                   |       |                                        |       |                                         |       |       |                                         |                   |                                        |     |                                        |     |                                         |     |                                            |                                            |      |     |

|        |       |       |       |       |       |       |       |       |       |      |    |      |    |      |    |      |    |           |           |      |    |
|--------|-------|-------|-------|-------|-------|-------|-------|-------|-------|------|----|------|----|------|----|------|----|-----------|-----------|------|----|
| O8-75  | 0.082 | 0.001 | 1.641 | 0.029 | 0.145 | 0.002 | 0.026 | 4E-04 | 2.06  | 1251 | 16 | 986  | 11 | 871  | 11 | 517  | 7  | 13.20321  | 30.3757   | 871  | 11 |
| O8-105 | 0.073 | 0.001 | 1.474 | 0.025 | 0.146 | 0.002 | 0.04  | 5E-04 | 0.68  | 1023 | 17 | 920  | 10 | 877  | 10 | 796  | 10 | 4.903079  | 14.27175  | 877  | 10 |
| O8-127 | 0.079 | 0.002 | 1.603 | 0.034 | 0.147 | 0.002 | 0.042 | 6E-04 | 0.86  | 1178 | 23 | 971  | 13 | 882  | 10 | 838  | 12 | 10.0907   | 25.12733  | 882  | 10 |
| O8-08  | 0.071 | 0.001 | 1.482 | 0.022 | 0.151 | 0.001 | -0.04 | 5E-04 | 0.72  | 960  | 16 | 923  | 9  | 908  | 8  | -863 | 10 | 1.651982  | 5.416667  | 908  | 8  |
| O8-192 | 0.073 | 0.001 | 1.534 | 0.026 | 0.153 | 0.002 | 0.046 | 5E-04 | 5.82  | 1006 | 42 | 944  | 11 | 918  | 9  | 914  | 10 | 2.832244  | 8.747515  | 918  | 9  |
| O8-128 | 0.075 | 0.001 | 1.614 | 0.027 | 0.156 | 0.002 | 0.04  | 6E-04 | 1.43  | 1070 | 17 | 976  | 10 | 934  | 10 | 789  | 11 | 4.496788  | 12.71028  | 934  | 10 |
| O8-03  | 0.083 | 0.001 | 1.793 | 0.024 | 0.157 | 0.001 | 0.023 | 3E-04 | 2.28  | 1272 | 13 | 1043 | 9  | 938  | 8  | 462  | 5  | 11.19403  | 26.25786  | 938  | 8  |
| O8-54  | 0.082 | 0.001 | 1.779 | 0.032 | 0.157 | 0.002 | 0.033 | 5E-04 | 1.47  | 1243 | 17 | 1038 | 12 | 942  | 12 | 649  | 9  | 10.19108  | 24.21561  | 942  | 12 |
| O8-150 | 0.074 | 0.001 | 1.615 | 0.03  | 0.158 | 0.002 | 0.038 | 6E-04 | 3.41  | 1040 | 19 | 976  | 12 | 948  | 11 | 747  | 11 | 2.953586  | 8.846154  | 948  | 11 |
| O8-50  | 0.077 | 0.002 | 1.741 | 0.043 | 0.164 | 0.002 | 0.049 | 6E-04 | 4.36  | 1122 | 57 | 1024 | 16 | 978  | 12 | 971  | 12 | 4.703476  | 12.83422  | 978  | 12 |
| O8-152 | 0.082 | 0.002 | 1.86  | 0.041 | 0.164 | 0.002 | 0.049 | 6E-04 | 10.74 | 1248 | 51 | 1067 | 14 | 981  | 12 | 967  | 12 | 8.766565  | 21.39423  | 981  | 12 |
| O8-01  | 0.074 | 0.001 | 1.702 | 0.023 | 0.166 | 0.002 | 0.048 | 5E-04 | 0.91  | 1047 | 14 | 1009 | 9  | 993  | 9  | 941  | 9  | 1.611279  | 5.157593  | 993  | 9  |
| O8-110 | 0.082 | 0.002 | 2.473 | 0.052 | 0.217 | 0.003 | 0.046 | 7E-04 | 1.1   | 1256 | 22 | 1264 | 15 | 1269 | 15 | 902  | 14 | -0.394011 | -1.035032 | 1256 | 22 |
| O8-28  | 0.088 | 0.002 | 2.223 | 0.04  | 0.183 | 0.002 | 0.03  | 4E-04 | 2.52  | 1384 | 18 | 1188 | 13 | 1084 | 12 | 592  | 9  | 9.594096  | 21.6763   | 1384 | 18 |
| O8-141 | 0.097 | 0.002 | 3.037 | 0.05  | 0.226 | 0.003 | 0.061 | 8E-04 | 1.41  | 1572 | 14 | 1417 | 13 | 1316 | 15 | 1198 | 16 | 7.674772  | 16.28499  | 1572 | 14 |
| O8-156 | 0.098 | 0.002 | 3.048 | 0.064 | 0.226 | 0.003 | 0.058 | 1E-03 | 1.75  | 1587 | 21 | 1420 | 16 | 1311 | 15 | 1149 | 19 | 8.314264  | 17.3913   | 1587 | 21 |
| O8-173 | 0.101 | 0.001 | 3.498 | 0.052 | 0.252 | 0.003 | 0.069 | 8E-04 | 1.33  | 1634 | 13 | 1527 | 12 | 1451 | 15 | 1346 | 16 | 5.237767  | 11.19951  | 1634 | 13 |
| O8-124 | 0.102 | 0.003 | 3.628 | 0.103 | 0.259 | 0.003 | 0.075 | 9E-04 | 1.06  | 1656 | 59 | 1556 | 23 | 1483 | 17 | 1469 | 16 | 4.922454  | 10.44686  | 1656 | 59 |
| O8-169 | 0.111 | 0.003 | 4.701 | 0.119 | 0.308 | 0.004 | 0.097 | 0.002 | 1.21  | 1813 | 26 | 1767 | 21 | 1729 | 21 | 1879 | 31 | 2.197802  | 4.633205  | 1813 | 26 |
| O8-98  | 0.113 | 0.002 | 4.446 | 0.079 | 0.286 | 0.004 | 0.017 | 3E-04 | 1.32  | 1845 | 16 | 1721 | 15 | 1621 | 18 | 343  | 6  | 6.169031  | 12.14092  | 1845 | 16 |
| O8-159 | 0.145 | 0.003 | 6.869 | 0.131 | 0.343 | 0.004 | 0.085 | 0.001 | 1.19  | 2291 | 17 | 2095 | 17 | 1901 | 21 | 1647 | 25 | 10.20516  | 17.02313  | 2291 | 17 |
| O8-166 | 0.162 | 0.002 | 8.754 | 0.136 | 0.393 | 0.005 | 0.074 | 1E-03 | 1.23  | 2474 | 12 | 2313 | 14 | 2134 | 21 | 1451 | 18 | 8.388004  | 13.74293  | 2474 | 12 |
