# Supplementary material
Source: publisher figshare collection journal article supplement (https://gsapubs.figshare.com/articles/dataset/_/14582763)
Supplement: Supplementary file 4 [file 1]

Table DR10 Compiled Nd-Sr isotopic compositions from sediment sources in the Indus River drainage basin (Karakoram)

| Sample name                   | Formation                                 | Sr (ppm) | Nd (ppm) | $^{87}\text{Sr}/^{86}\text{Sr}$ | SE | $^{143}\text{Nd}/^{144}\text{Nd}$ | SE      | $\epsilon_{\text{Nd}}$ |
|-------------------------------|-------------------------------------------|----------|----------|---------------------------------|----|-----------------------------------|---------|------------------------|
| <u>Debon et al., 1987</u>     |                                           |          |          |                                 |    |                                   |         |                        |
| KK 157                        | Karakoram Batholith                       | 438      | no data  | 0.708700                        | 6  | no data                           | no data | no data                |
| KK 160                        | Karakoram Batholith                       | 544      | no data  | 0.705300                        | 1  | no data                           | no data | no data                |
| KK 159                        | Karakoram Batholith                       | 355      | no data  | 0.707300                        | 1  | no data                           | no data | no data                |
| KK 163                        | Karakoram Batholith                       | 78       | no data  | 0.715900                        | 3  | no data                           | no data | no data                |
| KK 164                        | Karakoram Batholith                       | 199      | no data  | 0.708700                        | 4  | no data                           | no data | no data                |
| KK 165                        | Karakoram Batholith                       | 105      | no data  | 0.712600                        | 2  | no data                           | no data | no data                |
| KK 145                        | Karakoram Batholith                       | 333      | no data  | 0.707960                        | 5  | no data                           | no data | no data                |
| KK 145                        | Karakoram Batholith                       | 19       | no data  | 0.754970                        | 7  | no data                           | no data | no data                |
| KK 151                        | Karakoram Batholith                       | 378      | no data  | 0.709180                        | 8  | no data                           | no data | no data                |
| KK 144                        | Karakoram Batholith                       | 224      | no data  | 0.712280                        | 7  | no data                           | no data | no data                |
| KK 154                        | Karakoram Batholith                       | 247      | no data  | 0.714340                        | 7  | no data                           | no data | no data                |
| KK 155                        | Karakoram Batholith                       | 218      | no data  | 0.714530                        | 7  | no data                           | no data | no data                |
| KK 153                        | Karakoram Batholith                       | 160      | no data  | 0.712990                        | 6  | no data                           | no data | no data                |
| KK 12                         | Karakoram Batholith                       | 144      | no data  | 0.707200                        | 3  | no data                           | no data | no data                |
| KK 11                         | Karakoram Batholith                       | 137      | no data  | 0.707700                        | 2  | no data                           | no data | no data                |
| KK 13                         | Karakoram Batholith                       | 102      | no data  | 0.709770                        | 4  | no data                           | no data | no data                |
| KK 10                         | Karakoram Batholith                       | 68       | no data  | 0.711000                        | 6  | no data                           | no data | no data                |
| KK 9                          | Karakoram Batholith                       | 65       | no data  | 0.714800                        | 11 | no data                           | no data | no data                |
| KK 33                         | Karakoram Batholith                       | 9        | no data  | 0.770640                        | 4  | no data                           | no data | no data                |
| KK 40                         | Karakoram Batholith                       | 66       | no data  | 0.711400                        | 2  | no data                           | no data | no data                |
| KK 42                         | Karakoram Batholith                       | 395      | no data  | 0.710990                        | 6  | no data                           | no data | no data                |
| PN 45                         | Karakoram Batholith                       | 354      | no data  | 0.711500                        | 2  | no data                           | no data | no data                |
| PN 45                         | Karakoram Batholith                       | 5        | no data  | 0.773900                        | 9  | no data                           | no data | no data                |
| KK 57                         | Karakoram Batholith                       | 340      | no data  | 0.710700                        | 6  | no data                           | no data | no data                |
| KK 100                        | Karakoram Batholith                       | 344      | no data  | 0.711330                        | 6  | no data                           | no data | no data                |
| KK 100                        | Karakoram Batholith                       | 12       | no data  | 0.727830                        | 20 | no data                           | no data | no data                |
| KK 92                         | Karakoram Batholith                       | 298      | no data  | 0.711270                        | 3  | no data                           | no data | no data                |
| PN 43                         | Karakoram Batholith                       | 264      | no data  | 0.712800                        | 3  | no data                           | no data | no data                |
| PN 43                         | Karakoram Batholith                       | 7        | no data  | 0.762800                        | 14 | no data                           | no data | no data                |
| KK 226                        | Karakoram Batholith                       | 265      | no data  | 0.715810                        | 5  | no data                           | no data | no data                |
| KK 58                         | Karakoram Batholith                       | 201      | no data  | 0.713340                        | 5  | no data                           | no data | no data                |
| KK 93                         | Karakoram Batholith                       | 140      | no data  | 0.712930                        | 4  | no data                           | no data | no data                |
| <u>Schärer et al., 1990</u>   |                                           |          |          |                                 |    |                                   |         |                        |
| K10                           | Karakoram Batholith                       | 394      | 15       | 0.709810                        | 4  | 0.512154                          | 20      | -9.44                  |
| K11                           | Karakoram Batholith                       | 417      | 10.6     | 0.718560                        | 3  | 0.512059                          | 28      | -11.29                 |
| K21                           | Southern Karakoram<br>Metamorphic Complex | 359      | 37.1     | 0.715100                        | 5  | 0.512055                          | 27      | -11.37                 |
| K26                           | Southern Karakoram<br>Metamorphic Complex | 333      | 6.1      | 0.712800                        | 3  | 0.512207                          | 20      | -8.41                  |
| <u>Mahéo et al., 2009</u>     |                                           |          |          |                                 |    |                                   |         |                        |
| BD45                          | Karakoram Batholith                       | 647      | 35.3     | 0.708821                        | 12 | 0.512287                          | no data | -6.85                  |
| BD52                          | Karakoram Batholith                       | 581      | 27.5     | 0.707733                        | 13 | 0.512176                          | no data | -9.01                  |
| BD83                          | Karakoram Batholith                       | 406      | 28.8     | 0.709704                        | 16 | 0.512188                          | no data | -8.78                  |
| BD91                          | Karakoram Batholith                       | 220      | 18.3     | 0.712984                        | 10 | 0.512067                          | no data | -11.14                 |
| BD109                         | Karakoram Batholith                       | 1076     | 51.7     | 0.708887                        | 12 | 0.512251                          | no data | -7.55                  |
| BD79                          | Karakoram Batholith                       | 525      | 64.2     | 0.709876                        | 9  | 0.512254                          | no data | -7.49                  |
| <u>Reichardt et al., 2010</u> |                                           |          |          |                                 |    |                                   |         |                        |
| AGH23a                        | Karakoram Batholith                       | 903.4    | 81.59    | 0.708970                        | /  | 0.512280                          | no data | -6.98                  |
| AGH25a                        | Karakoram Batholith                       | 155.61   | 12.03    | 0.708310                        | /  | 0.512350                          | no data | -5.62                  |
| NBR1b                         | Karakoram Batholith                       | 363.24   | 16.05    | 0.708090                        | /  | 0.512340                          | no data | -5.81                  |
| NBR2a                         | Karakoram Batholith                       | 501.35   | 24.47    | 0.708550                        | /  | 0.512300                          | no data | -6.59                  |
| NBR3b                         | Karakoram Batholith                       | 336.8    | 20.27    | 0.709630                        | /  | 0.512260                          | no data | -7.37                  |

Table DR10 Compiled Nd-Sr isotopic compositions from sediment sources in the Indus River drainage basin (Kohistan)

| Sample name                        | Formation          | Sr (ppm) | Nd (ppm) | $^{87}\text{Sr}/^{86}\text{Sr}$ | SE      | $^{143}\text{Nd}/^{144}\text{Nd}$ | SE      | $\epsilon_{\text{Nd}}$ |
|------------------------------------|--------------------|----------|----------|---------------------------------|---------|-----------------------------------|---------|------------------------|
| <u>Petterson and Windley, 1985</u> |                    |          |          |                                 |         |                                   |         |                        |
| A144                               | Kohistan batholith | 140      | no data  | 0.704620                        | no data | no data                           | no data | no data                |
| A145                               | Kohistan batholith | 149      | no data  | 0.704300                        | no data | no data                           | no data | no data                |
| A149                               | Kohistan batholith | 137      | no data  | 0.704220                        | no data | no data                           | no data | no data                |
| A150                               | Kohistan batholith | 114      | no data  | 0.704520                        | no data | no data                           | no data | no data                |
| A151                               | Kohistan batholith | 113      | no data  | 0.704560                        | no data | no data                           | no data | no data                |
| A153                               | Kohistan batholith | 117      | no data  | 0.704700                        | no data | no data                           | no data | no data                |
| A248                               | Kohistan batholith | 91       | no data  | 0.705410                        | no data | no data                           | no data | no data                |
| A67                                | Kohistan batholith | 249      | no data  | 0.705860                        | no data | no data                           | no data | no data                |
| A68                                | Kohistan batholith | 248      | no data  | 0.705730                        | no data | no data                           | no data | no data                |
| A71                                | Kohistan batholith | 262      | no data  | 0.705630                        | no data | no data                           | no data | no data                |
| P43                                | Kohistan batholith | 641      | no data  | 0.704310                        | no data | no data                           | no data | no data                |
| A135                               | Kohistan batholith | 462      | no data  | 0.704630                        | no data | no data                           | no data | no data                |
| A136                               | Kohistan batholith | 571      | no data  | 0.704510                        | no data | no data                           | no data | no data                |
| A137                               | Kohistan batholith | 478      | no data  | 0.704830                        | no data | no data                           | no data | no data                |
| A138                               | Kohistan batholith | 442      | no data  | 0.704600                        | no data | no data                           | no data | no data                |
| A139                               | Kohistan batholith | 451      | no data  | 0.704680                        | no data | no data                           | no data | no data                |
| A140                               | Kohistan batholith | 574      | no data  | 0.704490                        | no data | no data                           | no data | no data                |
| A117                               | Kohistan batholith | 238      | no data  | 0.705270                        | no data | no data                           | no data | no data                |
| A157                               | Kohistan batholith | 381      | no data  | 0.704820                        | no data | no data                           | no data | no data                |
| A158                               | Kohistan batholith | 411      | no data  | 0.704600                        | no data | no data                           | no data | no data                |
| A159                               | Kohistan batholith | 397      | no data  | 0.704880                        | no data | no data                           | no data | no data                |
| A161                               | Kohistan batholith | 559      | no data  | 0.704640                        | no data | no data                           | no data | no data                |
| A162                               | Kohistan batholith | 371      | no data  | 0.704830                        | no data | no data                           | no data | no data                |
| A163                               | Kohistan batholith | 385      | no data  | 0.704820                        | no data | no data                           | no data | no data                |
| A19                                | Kohistan batholith | 114      | no data  | 0.707100                        | no data | no data                           | no data | no data                |
| A20                                | Kohistan batholith | 124      | no data  | 0.706790                        | no data | no data                           | no data | no data                |
| A21                                | Kohistan batholith | 131      | no data  | 0.706860                        | no data | no data                           | no data | no data                |
| A22                                | Kohistan batholith | 82       | no data  | 0.708150                        | no data | no data                           | no data | no data                |
| A23                                | Kohistan batholith | 90       | no data  | 0.707830                        | no data | no data                           | no data | no data                |
| A25                                | Kohistan batholith | 101      | no data  | 0.707460                        | no data | no data                           | no data | no data                |
| A26                                | Kohistan batholith | 104      | no data  | 0.707120                        | no data | no data                           | no data | no data                |
| <u>Debon et al., 1987</u>          |                    |          |          |                                 |         |                                   |         |                        |
| KK 198                             | Kohistan Batholith | 289      | no data  | 0.704900                        | 4       | no data                           | no data | no data                |
| KK 199                             | Kohistan Batholith | 61       | no data  | 0.710400                        | 2       | no data                           | no data | no data                |
| KK 194                             | Kohistan Batholith | 54       | no data  | 0.710300                        | 5       | no data                           | no data | no data                |
| KK 195                             | Kohistan Batholith | 35       | no data  | 0.715300                        | 3       | no data                           | no data | no data                |
| KK 215                             | Kohistan Batholith | 129      | no data  | 0.704860                        | 4       | no data                           | no data | no data                |
| KK 215                             | Kohistan Batholith | 8        | no data  | 0.728800                        | 9       | no data                           | no data | no data                |
| KK 212                             | Kohistan Batholith | 144      | no data  | 0.705400                        | 3       | no data                           | no data | no data                |
| KK 212                             | Kohistan Batholith | 8        | no data  | 0.738300                        | 5       | no data                           | no data | no data                |
| <u>George et al., 1993</u>         |                    |          |          |                                 |         |                                   |         |                        |
| G10-A                              | Kohistan batholith | no data  | no data  | 0.705350                        | 2       | no data                           | no data | no data                |
| G10-D                              | Kohistan batholith | no data  | no data  | 0.705210                        | 2       | 0.512670                          | 1       | 0.62                   |
| G10-E                              | Kohistan batholith | no data  | no data  | 0.705010                        | 2       | no data                           | no data | no data                |
| G10-F                              | Kohistan batholith | no data  | no data  | 0.705120                        | 6       | no data                           | no data | no data                |
| G10-G                              | Kohistan batholith | no data  | no data  | 0.705110                        | 5       | no data                           | no data | no data                |
| G10-H                              | Kohistan batholith | no data  | no data  | 0.705010                        | 2       | 0.512660                          | 1       | 0.43                   |
| S95                                | Kohistan batholith | no data  | no data  | 0.704880                        | 3       | no data                           | no data | no data                |
| S6G                                | Kohistan batholith | no data  | no data  | 0.704800                        | 2       | no data                           | no data | no data                |
| S81                                | Kohistan batholith | no data  | no data  | 0.707860                        | 2       | no data                           | no data | no data                |
| D17                                | Kohistan batholith | no data  | no data  | 0.708120                        | 2       | no data                           | no data | no data                |
| S67                                | Kohistan batholith | no data  | no data  | 0.708460                        | 2       | no data                           | no data | no data                |
| S75                                | Kohistan batholith | no data  | no data  | 0.709690                        | 2       | no data                           | no data | no data                |
| S76                                | Kohistan batholith | no data  | no data  | 0.708200                        | 2       | no data                           | no data | no data                |
| G2                                 | Kohistan batholith | no data  | no data  | 0.707520                        | 2       | 0.512760                          | 3       | 2.38                   |
| G3                                 | Kohistan batholith | no data  | no data  | 0.728320                        | 2       | 0.512630                          | 4       | -0.16                  |
| G14                                | Kohistan batholith | no data  | no data  | 0.705810                        | 2       | no data                           | no data | no data                |
| G23                                | Kohistan batholith | no data  | no data  | 0.710760                        | 2       | no data                           | no data | no data                |
| S97                                | Kohistan batholith | no data  | no data  | 0.735460                        | 2       | no data                           | no data | no data                |
| G43                                | Kohistan batholith | no data  | no data  | 0.760320                        | 2       | 0.511960                          | 2       | -13.23                 |
| G35                                | Kohistan batholith | no data  | no data  | 0.725050                        | 2       | no data                           | no data | no data                |
| G36                                | Kohistan batholith | no data  | no data  | 0.708380                        | 9       | no data                           | no data | no data                |
| G48                                | Kohistan batholith | no data  | no data  | 0.756400                        | 5       | no data                           | no data | no data                |
| S66                                | Kohistan batholith | no data  | no data  | 0.758420                        | 5       | no data                           | no data | no data                |
| D5                                 | Kohistan batholith | no data  | no data  | 0.723500                        | 2       | no data                           | no data | no data                |
| G30                                | Kohistan batholith | no data  | no data  | 0.740510                        | 2       | 0.511900                          | 2       | -14.40                 |
| <u>Khan et al., 1997</u>           |                    |          |          |                                 |         |                                   |         |                        |
| IK 1007                            | Chilas Complex     | 427      | 0.81     | 0.704050                        | no data | 0.512800                          | no data | 3.16                   |
| IK 1009                            | Chilas Complex     | 64       | 0.73     | 0.704040                        | no data | 0.512840                          | no data | 3.94                   |
| IK 1012                            | Chilas Complex     | 403      | 13.6     | 0.704230                        | no data | 0.512740                          | no data | 1.99                   |
| IK 1017                            | Chilas Complex     | 446      | 13       | 0.704120                        | no data | 0.512740                          | no data | 1.99                   |
| PL 28                              | Chalt Volcanics    | 71       | 2.13     | 0.705160                        | no data | 0.513010                          | no data | 7.26                   |
| PL 29                              | Chalt Volcanics    | 211      | 6.9      | 0.705440                        | no data | 0.513010                          | no data | 7.26                   |
| N 115                              | Chalt Volcanics    | 67       | 5.3      | 0.706760                        | no data | 0.512990                          | no data | 6.87                   |
| N 116                              | Chalt Volcanics    | 114      | 7.7      | 0.705200                        | no data | 0.512950                          | no data | 6.09                   |
| N 138                              | Chalt Volcanics    | 51       | 1.36     | 0.705250                        | no data | 0.512970                          | no data | 6.48                   |
| N 139                              | Chalt Volcanics    | 845      | 3.18     | 0.704930                        | no data | 0.512970                          | no data | 6.48                   |

|                                  |                     |         |         |          |         |          |         |         |
|----------------------------------|---------------------|---------|---------|----------|---------|----------|---------|---------|
| N 161                            | Chalt Volcanics     | 48      | 1.25    | 0.705610 | no data | 0.513000 | no data | 7.06    |
| IK 580                           | Chalt Volcanics     | 91      | 1.72    | 0.705490 | no data | 0.512990 | no data | 6.87    |
| A 83                             | Kamila Amphibolites | 150     | 15.4    | 0.703880 | no data | 0.513020 | no data | 7.45    |
| A 86                             | Kamila Amphibolites | 137     | 16.6    | 0.703840 | no data | 0.512990 | no data | 6.87    |
| A 93                             | Kamila Amphibolites | 169     | 12.7    | 0.703660 | no data | 0.513010 | no data | 7.26    |
| A 119                            | Kamila Amphibolites | 233     | 8.4     | 0.704170 | no data | 0.512840 | no data | 3.94    |
| A 121                            | Kamila Amphibolites | 268     | 5.8     | 0.704670 | no data | 0.512830 | no data | 3.75    |
| A 125                            | Kamila Amphibolites | 257     | 14      | 0.704670 | no data | 0.512740 | no data | 1.99    |
| <u>Gazis et al., 1998</u>        |                     |         |         |          |         |          |         |         |
| PK-90-KK-16                      | Kohistan Batholite  | 37.9    |         | 0.704440 | 3       | no data  | no data | no data |
| <u>Bignold and Treloar, 2003</u> |                     |         |         |          |         |          |         |         |
| SW3                              | Kamila Amphibolites | 366.67  | 13.13   | 0.704460 | no data | 0.512740 | no data | 1.99    |
| N433                             | Jaglot Group        | 321     | 14.2    | 0.703230 | no data | 0.512940 | no data | 5.89    |
| TL5                              | Jaglot Group        | 311     | 10.6    | 0.704070 | no data | 0.512860 | no data | 4.33    |
| N434                             | Jaglot Group        | 86.7    | 6.82    | 0.707910 | no data | 0.512970 | no data | 6.48    |
| TL6                              | Jaglot Group        | 66.4    | 3.98    | 0.707880 | no data | 0.512300 | no data | -6.59   |
| N146                             | Chalt Volcanics     | 18.1    | 1.72    | 0.705250 | no data | 0.512960 | no data | 6.28    |
| N157                             | Chalt Volcanics     | 116.6   | 1.49    | 0.705140 | no data | 0.513010 | no data | 7.26    |
| N158                             | Chalt Volcanics     | 50.5    | 1.38    | 0.705540 | no data | 0.513030 | no data | 7.65    |
| N163                             | Chalt Volcanics     | 202.67  | 1.71    | 0.705590 | no data | 0.513030 | no data | 7.65    |
| <u>Khan et al., 2004</u>         |                     |         |         |          |         |          |         |         |
| 44D                              | Kohistan batholith  | 345     | 10      | 0.704430 | no data | 0.512810 | no data | 3.36    |
| 44E                              | Kohistan batholith  | 308     | 18.6    | 0.704090 | no data | 0.512840 | no data | 3.94    |
| 71                               | Kohistan batholith  | 193     | 19.4    | 0.704060 | no data | 0.512870 | no data | 4.53    |
| 44B                              | Kohistan batholith  | 389     | 30.6    | 0.704170 | no data | 0.512850 | no data | 4.14    |
| LP-4                             | Kohistan batholith  | 419     | 30.7    | 0.704120 | no data | 0.512860 | no data | 4.33    |
| 44C                              | Kohistan batholith  | 455     | 15      | 0.704040 | no data | 0.512920 | no data | 5.50    |
| 58                               | Kohistan batholith  | 315     | 13.2    | 0.704090 | no data | 0.512850 | no data | 4.14    |
| 73                               | Kohistan batholith  | 141     | 14.8    | 0.704010 | no data | 0.512890 | no data | 4.92    |
| 68                               | Kohistan batholith  | 364     | 16.5    | 0.705000 | no data | 0.512850 | no data | 4.14    |
| 987-7                            | Kohistan batholith  | no data | no data | 0.704440 | no data | 0.512852 | no data | 4.17    |
| <u>Jagoutz et al., 2006</u>      |                     |         |         |          |         |          |         |         |
| C-7                              | Chilas Complex      | no data | 2.018   | no data  | no data | 0.512882 | no data | 4.76    |
| C-48                             | Chilas Complex      | no data | 1.675   | no data  | no data | 0.512900 | no data | 5.11    |
| C-174                            | Chilas Complex      | no data | 0.08    | no data  | no data | 0.512953 | no data | 6.14    |
| C-218                            | Chilas Complex      | no data | 0.86    | no data  | no data | 0.512929 | no data | 5.68    |
| CO3-43                           | Chilas Complex      | no data | 1.061   | no data  | no data | 0.512902 | no data | 5.15    |
| C03-44                           | Chilas Complex      | no data | 1.581   | no data  | no data | 0.512906 | no data | 5.23    |
| C03-45                           | Chilas Complex      | no data | 0.476   | no data  | no data | 0.512895 | no data | 5.01    |
| <u>Khan et al., 2009</u>         |                     |         |         |          |         |          |         |         |
| 1                                | Kohistan batholith  | 771.61  | 19.46   | 0.704135 | no data | 0.512830 | no data | 3.75    |
| 2                                | Kohistan batholith  | 184.25  | 14.09   | 0.704785 | no data | 0.512831 | no data | 3.76    |
| 9                                | Kohistan batholith  | 1671.79 | 81.38   | 0.704147 | no data | 0.512840 | no data | 3.94    |
| 16                               | Kohistan batholith  | no data | no data | 0.704478 | no data | 0.512901 | no data | 5.13    |
| 17                               | Kohistan batholith  | no data | no data | 0.704459 | no data | 0.512884 | no data | 4.80    |
| 18                               | Kohistan batholith  | 282.31  | 16.78   | 0.704881 | no data | 0.512892 | no data | 4.95    |
| 33                               | Kohistan batholith  | 306.88  | 15.12   | 0.704693 | no data | 0.512826 | no data | 3.67    |
| 34                               | Kohistan batholith  | no data | no data | 0.704347 | no data | 0.512827 | no data | 3.69    |
| 41                               | Kohistan batholith  | 2542.7  | 89.39   | 0.703806 | no data | 0.512883 | no data | 4.78    |
| 47                               | Kohistan batholith  | no data | no data | 0.703942 | no data | no data  | no data | no data |
| 9                                | Kohistan batholith  | no data | no data | 0.704331 | no data | 0.512908 | no data | 5.27    |
| 61                               | Kohistan batholith  | no data | no data | 0.704342 | no data | 0.512791 | no data | 2.98    |
| 69                               | Kohistan batholith  | no data | no data | 0.704233 | no data | 0.512895 | no data | 5.01    |
| 70                               | Kohistan batholith  | no data | no data | 0.704355 | no data | 0.512942 | no data | 5.93    |
| 72                               | Kohistan batholith  | no data | no data | 0.704192 | no data | 0.512938 | no data | 5.85    |
| 76                               | Kohistan batholith  | 1716.62 | 24.89   | 0.704085 | no data | 0.512959 | no data | 6.26    |
| 103                              | Kohistan batholith  | no data | no data | 0.704278 | no data | 0.512911 | no data | 5.33    |
| 8                                | Kohistan batholith  | 3596.3  | 149.77  | 0.704615 | no data | 0.512710 | no data | 1.40    |
| 20                               | Kohistan batholith  | 676.36  | 75.29   | 0.705172 | no data | 0.512821 | no data | 3.57    |
| 38                               | Kohistan batholith  | 216.62  | 11.68   | 0.705156 | no data | 0.512819 | no data | 3.53    |
| 52                               | Kohistan batholith  | 477.39  | 4.36    | 0.704538 | no data | 0.512821 | no data | 3.57    |
| 63                               | Kohistan batholith  | no data | no data | 0.704070 | no data | 0.512864 | no data | 4.41    |
| 67                               | Kohistan batholith  | 1439.74 | 83.27   | 0.704865 | no data | 0.512781 | no data | 2.79    |
| 96                               | Kohistan batholith  | no data | no data | 0.704921 | no data | 0.512806 | no data | 3.28    |
| 99                               | Kohistan batholith  | no data | no data | 0.705109 | no data | 0.512654 | no data | 0.31    |
| 104                              | Kohistan batholith  | 368.02  | 11.17   | 0.704236 | no data | 0.512910 | no data | 5.31    |
| 106                              | Kohistan batholith  | no data | no data | 0.704105 | no data | 0.512929 | no data | 5.68    |
| 108                              | Kohistan batholith  | 399.92  | 11.42   | 0.704115 | no data | 0.512932 | no data | 5.74    |
| 111                              | Kohistan batholith  | 253.99  | 10.85   | 0.704811 | no data | 0.512841 | no data | 3.96    |

Table DR10 Compiled Nd-Sr isotopic compositions from sediment sources in the Indus River drainage basin (Ladakh)

| Sample name                     | Formation        | Sr (ppm) | Nd (ppm) | $^{87}\text{Sr}/^{86}\text{Sr}$ | SE      | $^{143}\text{Nd}/^{144}\text{Nd}$ | SE      | $\epsilon_{\text{Nd}}$ |
|---------------------------------|------------------|----------|----------|---------------------------------|---------|-----------------------------------|---------|------------------------|
| <u>Allègre and Othman, 1980</u> |                  |          |          |                                 |         |                                   |         |                        |
| HB68                            | Ladakh Batholith | no data  | no data  | 0.705000                        | 1       | 0.512560                          | 3       | -1.52                  |
| HB74                            | Ladakh Batholith | no data  | no data  | 0.704800                        | 1       | 0.512730                          | 3       | 1.79                   |
| <u>Honegger et al., 1982</u>    |                  |          |          |                                 |         |                                   |         |                        |
| HT341                           | Dras Volcanics   | 270      | no data  | 0.703650                        | no data | no data                           | no data | no data                |
| HT343                           | Dras Volcanics   | 247      | no data  | 0.703360                        | no data | no data                           | no data | no data                |
| HT342                           | Dras Volcanics   | 359      | no data  | 0.703530                        | no data | no data                           | no data | no data                |
| HT340                           | Dras Volcanics   | 162      | no data  | 0.703490                        | no data | no data                           | no data | no data                |
| HT345                           | Dras Volcanics   | 445      | no data  | 0.703900                        | no data | no data                           | no data | no data                |
| HT346                           | Dras Volcanics   | 234      | no data  | 0.705220                        | no data | no data                           | no data | no data                |
| HT347                           | Dras Volcanics   | 293      | no data  | 0.704920                        | no data | no data                           | no data | no data                |
| HT348                           | Dras Volcanics   | 539      | no data  | 0.704230                        | no data | no data                           | no data | no data                |
| HT349                           | Dras Volcanics   | 443      | no data  | 0.704040                        | no data | no data                           | no data | no data                |
| HT350                           | Dras Volcanics   | 351      | no data  | 0.703980                        | no data | no data                           | no data | no data                |
| HT344                           | Dras Volcanics   | 167      | no data  | 0.704260                        | no data | no data                           | no data | no data                |
| HT407                           | Dras Volcanics   | 271      | no data  | 0.704900                        | no data | no data                           | no data | no data                |
| HT408                           | Dras Volcanics   | 156      | no data  | 0.705670                        | no data | no data                           | no data | no data                |
| HT121                           | Ladakh Batholith | 522.5    | no data  | 0.704540                        | no data | no data                           | no data | no data                |
| HT123                           | Ladakh Batholith | 686.8    | no data  | 0.703650                        | no data | no data                           | no data | no data                |
| HT124                           | Ladakh Batholith | 541.7    | no data  | 0.704150                        | no data | no data                           | no data | no data                |
| HT125                           | Ladakh Batholith | 447      | no data  | 0.705260                        | no data | no data                           | no data | no data                |
| HT129                           | Ladakh Batholith | 612      | no data  | 0.704450                        | no data | no data                           | no data | no data                |
| HT132                           | Ladakh Batholith | 364.8    | no data  | 0.704560                        | no data | no data                           | no data | no data                |
| HT133                           | Ladakh Batholith | 328      | no data  | 0.705320                        | no data | no data                           | no data | no data                |
| HT134                           | Ladakh Batholith | 190      | no data  | 0.706660                        | no data | no data                           | no data | no data                |
| HT135                           | Ladakh Batholith | 349.4    | no data  | 0.704790                        | no data | no data                           | no data | no data                |
| HT144                           | Ladakh Batholith | 275.7    | no data  | 0.705750                        | no data | no data                           | no data | no data                |
| HT145                           | Ladakh Batholith | 84       | no data  | 0.709230                        | no data | no data                           | no data | no data                |
| HT146                           | Ladakh Batholith | 140.6    | no data  | 0.707770                        | no data | no data                           | no data | no data                |
| P79                             | Ladakh Batholith | 448      | no data  | 0.707060                        | no data | no data                           | no data | no data                |
| <u>Rolland et al., 2002</u>     |                  |          |          |                                 |         |                                   |         |                        |
| L140                            | Western Ladakh   | no data  | no data  | 0.704352                        | 7       | 0.512838                          | 12      | 3.90                   |
| L156                            | Western Ladakh   | 262      | 4.99     | 0.705492                        | 17      | 0.512976                          | 7       | 6.59                   |
| L174                            | Western Ladakh   | 128      | 7.61     | 0.705059                        | 9       | 0.513059                          | 5       | 8.21                   |
| L157                            | Western Ladakh   | 115      | 3.21     | 0.704378                        | 9       | 0.512989                          | 2       | 6.85                   |
| L116                            | Western Ladakh   | 481      | 26.24    | 0.704123                        | 12      | 0.512901                          | 7       | 5.13                   |
| L118                            | Western Ladakh   | 954      | 18.85    | 0.704312                        | 14      | 0.512918                          | 9       | 5.46                   |
| L117                            | Western Ladakh   | 202      | 4.82     | 0.704878                        | 10      | 0.512985                          | 5       | 6.77                   |
| L144                            | Western Ladakh   | 453      | 18.57    | 0.704686                        | 11      | 0.512829                          | 7       | 3.73                   |
| L59                             | Western Ladakh   | 238      | 4.61     | 0.705454                        | 10      | 0.512895                          | 14      | 5.01                   |
| L65                             | Western Ladakh   | 1132     | 41.17    | 0.704859                        | 11      | 0.512653                          | 4.5     | 0.29                   |
| L55                             | Western Ladakh   | 451      | 17.4     | 0.709355                        | 9       | 0.512514                          | 6       | -2.42                  |
| L55                             | Western Ladakh   | 451      | 17.4     | no data                         | no data | 0.512500                          | 5       | -2.69                  |
| L175                            | Western Ladakh   | 219      | 20.55    | no data                         | no data | 0.512726                          | 3       | 1.72                   |
| L179                            | Western Ladakh   | 163      | 19.06    | no data                         | no data | 0.512790                          | 5       | 2.97                   |
| L573                            | Western Ladakh   | 249      | 9.7      | no data                         | no data | 0.512828                          | 7       | 3.71                   |
| L575                            | Western Ladakh   | 200      | 8.45     | no data                         | no data | 0.512827                          | 7       | 3.69                   |
| L318                            | Eastern Ladakh   | 417      | 11.47    | no data                         | no data | 0.512759                          | 4       | 2.37                   |
| L317                            | Eastern Ladakh   | 265      | 37.49    | no data                         | no data | 0.512729                          | 5       | 1.77                   |
| L424                            | Eastern Ladakh   | 430      | 39.39    | no data                         | no data | 0.512877                          | 7       | 4.67                   |
| L352                            | Eastern Ladakh   | no data  | no data  | 0.704460                        | 10      | 0.512758                          | 8       | 2.33                   |
| L352                            | Eastern Ladakh   | no data  | no data  | no data                         | no data | no data                           | no data | no data                |
| L356                            | Eastern Ladakh   | no data  | no data  | no data                         | no data | 0.512745                          | 7       | 2.09                   |
| L423                            | Eastern Ladakh   | no data  | no data  | no data                         | no data | 0.512687                          | 10      | 0.95                   |
| L344                            | Eastern Ladakh   | 182      | 4.6      | no data                         | no data | 0.512637                          | 6       | -0.02                  |
| LK96d                           | Eastern Ladakh   | no data  | no data  | no data                         | no data | 0.512794                          | 5       | 3.04                   |
| LK16                            | Eastern Ladakh   | no data  | no data  | no data                         | no data | 0.512676                          | 6       | 0.74                   |
| L397                            | Eastern Ladakh   | no data  | no data  | no data                         | no data | 0.513130                          | 11      | 9.60                   |
| L399                            | Eastern Ladakh   | 66       | 18.81    | no data                         | no data | 0.512206                          | 10      | -8.43                  |
| <u>Reichardt et al., 2010</u>   |                  |          |          |                                 |         |                                   |         |                        |
| LEH40                           | Ladakh Batholith | no data  | 14.21    | 0.704850                        | no data | 0.512670                          | no data | 0.62                   |
| LEH55                           | Ladakh Batholith | 95       | 5.86     | 0.707820                        | no data | 0.512620                          | no data | -0.35                  |
| LEH29                           | Ladakh Batholith | 219      | 9.81     | 0.704650                        | no data | 0.512740                          | no data | 1.99                   |
| LEH38a                          | Ladakh Batholith | 119      | 11.51    | 0.705550                        | no data | 0.512700                          | no data | 1.21                   |
| LEH38b                          | Ladakh Batholith | 188      | 22.64    | 0.705450                        | no data | 0.512720                          | no data | 1.60                   |
| LEH52                           | Ladakh Batholith | 350      | 36.85    | 0.704850                        | no data | 0.512700                          | no data | 1.21                   |

Table DR10 Compiled Nd-Sr isotopic compositions from sediment sources in the Indus River drainage basin (GHS)

| Sample name                     | Formation     | Sr (ppm) | Nd (ppm) | $^{87}\text{Sr}/^{86}\text{Sr}$ | SE      | $^{143}\text{Nd}/^{144}\text{Nd}$ | SE      | $\epsilon_{\text{Nd}}$ |
|---------------------------------|---------------|----------|----------|---------------------------------|---------|-----------------------------------|---------|------------------------|
| <u>Allègre and Othman, 1980</u> |               |          |          |                                 |         |                                   |         |                        |
| Palung A404                     | Nepal         | no data  | no data  | 0.821310                        | 50      | 0.511970                          | 4       | -13.03                 |
| Makalu 132                      | Nepal         | no data  | no data  | no data                         | no data | 0.512110                          | 10      | -10.30                 |
| Nepal 22 D. Mani                | Nepal         | no data  | no data  | 0.743320                        | 40      | 0.511830                          | 7       | -15.76                 |
| <u>Vidal et al., 1982</u>       |               |          |          |                                 |         |                                   |         |                        |
| D45                             | Nepal-Manaslu | 58.3     | no data  | 0.754780                        | no data | no data                           | no data | no data                |
| D22                             | Nepal-Manaslu | 131      | no data  | 0.743100                        | no data | no data                           | no data | no data                |
| U277                            | Nepal-Manaslu | 46.9     | no data  | 0.763010                        | no data | no data                           | no data | no data                |
| U303                            | Nepal-Manaslu | 45       | no data  | 0.761760                        | no data | no data                           | no data | no data                |
| U464                            | Nepal-Manaslu | 54       | no data  | 0.763510                        | no data | no data                           | no data | no data                |
| U476                            | Nepal-Manaslu | 44.2     | no data  | 0.764770                        | no data | no data                           | no data | no data                |
| X12                             | Nepal-Manaslu | 52       | no data  | 0.763850                        | no data | no data                           | no data | no data                |
| N67 I                           | Nepal-Manaslu | 7.39     | no data  | 0.787390                        | no data | no data                           | no data | no data                |
| N67 II                          | Nepal-Manaslu | 7.65     | no data  | 0.784690                        | no data | no data                           | no data | no data                |
| B6                              | Nepal-Manaslu | 104      | no data  | 0.762550                        | no data | no data                           | no data | no data                |
| B7                              | Nepal-Manaslu | 91.7     | no data  | 0.754740                        | no data | no data                           | no data | no data                |
| T223                            | Nepal-Manaslu | 15.6     | no data  | 0.764350                        | no data | no data                           | no data | no data                |
| <u>Ferrara et al., 1983</u>     |               |          |          |                                 |         |                                   |         |                        |
| GA 1                            | Nepal-Everest | 82       | no data  | 0.769400                        | 4       | no data                           | no data | no data                |
| GA 2                            | Nepal-Everest | 112      | no data  | 0.737500                        | 3       | no data                           | no data | no data                |
| GA 3                            | Nepal-Everest | 105      | no data  | 0.737600                        | 3       | no data                           | no data | no data                |
| GA 4                            | Nepal-Everest | 18.5     | no data  | 0.765200                        | 4       | no data                           | no data | no data                |
| PG 7                            | Nepal-Everest | 16.4     | no data  | 0.782200                        | 20      | no data                           | no data | no data                |
| B 27                            | Nepal-Everest | 33.7     | no data  | 0.752900                        | 10      | no data                           | no data | no data                |
| B 28                            | Nepal-Everest | 92       | no data  | 0.753400                        | 7       | no data                           | no data | no data                |
| B 29                            | Nepal-Everest | 50       | no data  | 0.755300                        | 5       | no data                           | no data | no data                |
| B 50                            | Nepal-Everest | 91       | no data  | 0.750500                        | 9       | no data                           | no data | no data                |
| LH 87                           | Nepal-Everest | 112      | no data  | 0.737100                        | 4       | no data                           | no data | no data                |
| LH 120                          | Nepal-Everest | 275      | no data  | 0.746800                        | 4       | no data                           | no data | no data                |
| G 3                             | Nepal-Everest | 74.2     | no data  | 0.796800                        | 7       | no data                           | no data | no data                |
| PG 8                            | Nepal-Everest | 87.1     | no data  | 0.759200                        | 5       | no data                           | no data | no data                |
| L 79                            | Nepal-Everest | 38.4     | no data  | 0.880900                        | 5       | no data                           | no data | no data                |
| L 82                            | Nepal-Everest | 60       | no data  | 0.862500                        | 3       | no data                           | no data | no data                |
| L 92                            | Nepal-Everest | 147      | no data  | 0.747800                        | 3       | no data                           | no data | no data                |
| L 81                            | Nepal-Everest | 140      | no data  | 0.788800                        | 2       | no data                           | no data | no data                |
| L 94                            | Nepal-Everest | 221      | no data  | 0.743400                        | 2       | no data                           | no data | no data                |
| L 78                            | Nepal-Everest | 220      | no data  | 0.742300                        | 2       | no data                           | no data | no data                |
| <u>Deniel et al., 1987</u>      |               |          |          |                                 |         |                                   |         |                        |
| DK43                            | Nepal-Manaslu | 8        | no data  | 0.778220                        | 12      | no data                           | no data | no data                |
| DK45                            | Nepal-Manaslu | 4.5      | no data  | 0.832480                        | 26      | 0.511827                          | 36      | -15.82                 |
| DK46                            | Nepal-Manaslu | 6.5      | no data  | 0.787040                        | 15      | no data                           | no data | no data                |
| DK47                            | Nepal-Manaslu | 12       | no data  | 0.768640                        | 19      | no data                           | no data | no data                |
| DK48                            | Nepal-Manaslu | 10       | no data  | 0.777130                        | 12      | no data                           | no data | no data                |
| DK49                            | Nepal-Manaslu | 6.5      | no data  | 0.795030                        | 27      | no data                           | no data | no data                |
| DK50                            | Nepal-Manaslu | 5        | no data  | 0.802010                        | 11      | no data                           | no data | no data                |
| DK51                            | Nepal-Manaslu | 66       | no data  | 0.751470                        | 13      | no data                           | no data | no data                |
| DK52                            | Nepal-Manaslu | 82.5     | 4.3      | 0.749670                        | 9       | 0.511817                          | 24      | -16.02                 |
| DK53                            | Nepal-Manaslu | 146.5    | no data  | 0.744160                        | 12      | no data                           | no data | no data                |
| DK54                            | Nepal-Manaslu | 216      | 13.7     | 0.743280                        | 19      | 0.511880                          | 30      | -14.79                 |
| DK55a                           | Nepal-Manaslu | 204      | 11.8     | 0.742920                        | 8       | 0.511818                          | 21      | -16.00                 |
| DK55b                           | Nepal-Manaslu | 72       | no data  | 0.744280                        | 12      | no data                           | no data | no data                |
| DK56                            | Nepal-Manaslu | 104      | no data  | 0.744760                        | 12      | no data                           | no data | no data                |
| DK57                            | Nepal-Manaslu | 4.5      | no data  | 0.801250                        | 9       | no data                           | no data | no data                |
| DK58                            | Nepal-Manaslu | 4        | no data  | 0.771260                        | 18      | 0.511897                          | 12      | -14.45                 |
| DK59                            | Nepal-Manaslu | 65       | 4.3      | 0.745540                        | 14      | 0.511819                          | 35      | -15.98                 |
| DK65                            | Nepal-Manaslu | 49.5     | no data  | 0.760530                        | no data | no data                           | no data | no data                |
| DK67                            | Nepal-Manaslu | 83       | no data  | 0.743430                        | no data | no data                           | no data | no data                |
| DK72                            | Nepal-Manaslu | 100      | no data  | 0.745190                        | no data | no data                           | no data | no data                |
| DK98                            | Nepal-Manaslu | 64       | no data  | 0.754150                        | no data | no data                           | no data | no data                |
| DK102                           | Nepal-Manaslu | 61       | no data  | 0.755890                        | no data | no data                           | no data | no data                |
| DK111                           | Nepal-Manaslu | 56       | no data  | 0.757940                        | no data | no data                           | no data | no data                |
| DK112                           | Nepal-Manaslu | 53       | no data  | 0.750550                        | no data | no data                           | no data | no data                |
| DK116                           | Nepal-Manaslu | 54       | no data  | 0.754070                        | no data | no data                           | no data | no data                |
| DK136                           | Nepal-Manaslu | 54       | no data  | 0.752570                        | no data | no data                           | no data | no data                |
| DK138                           | Nepal-Manaslu | 55.5     | no data  | 0.751800                        | no data | no data                           | no data | no data                |
| DK139                           | Nepal-Manaslu | 65.5     | no data  | 0.746900                        | no data | no data                           | no data | no data                |
| DK140                           | Nepal-Manaslu | 58.5     | no data  | 0.748720                        | no data | no data                           | no data | no data                |
| DK141                           | Nepal-Manaslu | 65.5     | no data  | 0.751620                        | no data | no data                           | no data | no data                |
| DK151                           | Nepal-Manaslu | 70.5     | no data  | 0.753470                        | no data | no data                           | no data | no data                |
| DK152                           | Nepal-Manaslu | 25.5     | no data  | 0.767410                        | no data | no data                           | no data | no data                |
| DK157                           | Nepal-Manaslu | 71.5     | no data  | 0.755250                        | no data | no data                           | no data | no data                |
| DK160                           | Nepal-Manaslu | 66       | no data  | 0.755710                        | no data | no data                           | no data | no data                |
| DK161                           | Nepal-Manaslu | 72.5     | no data  | 0.755630                        | no data | no data                           | no data | no data                |
| DK162                           | Nepal-Manaslu | 43.5     | no data  | 0.761730                        | no data | no data                           | no data | no data                |
| DK167                           | Nepal-Manaslu | 63       | no data  | 0.764980                        | no data | no data                           | no data | no data                |
| DK180                           | Nepal-Manaslu | 107      | no data  | 0.743900                        | no data | no data                           | no data | no data                |
| DK185                           | Nepal-Manaslu | 111      | no data  | 0.749380                        | no data | no data                           | no data | no data                |

|                            |               |         |         |          |         |          |         |         |
|----------------------------|---------------|---------|---------|----------|---------|----------|---------|---------|
| DK186                      | Nepal-Manaslu | 103.5   | no data | 0.749500 | no data | no data  | no data | no data |
| DK188                      | Nepal-Manaslu | 87.5    | no data | 0.748850 | no data | no data  | no data | no data |
| DK191                      | Nepal-Manaslu | 69      | no data | 0.752690 | no data | no data  | no data | no data |
| DK195                      | Nepal-Manaslu | 135     | no data | 0.743590 | no data | no data  | no data | no data |
| DK211                      | Nepal-Manaslu | 78      | no data | 0.745330 | no data | no data  | no data | no data |
| DK213                      | Nepal-Manaslu | 63.5    | no data | 0.763370 | no data | no data  | no data | no data |
| DK214                      | Nepal-Manaslu | 54      | no data | 0.761260 | no data | no data  | no data | no data |
| DK217                      | Nepal-Manaslu | 48.5    | no data | 0.748510 | no data | no data  | no data | no data |
| DK220                      | Nepal-Manaslu | 60      | no data | 0.746330 | no data | no data  | no data | no data |
| DK237                      | Nepal-Manaslu | 46.5    | no data | 0.767920 | no data | 0.511981 | 21      | -12.82  |
| DK240                      | Nepal-Manaslu | 68      | no data | 0.747350 | no data | no data  | no data | no data |
| DK242                      | Nepal-Manaslu | 99.5    | no data | 0.746080 | no data | no data  | no data | no data |
| DK247                      | Nepal-Manaslu | 56      | no data | 0.766250 | no data | no data  | no data | no data |
| DK268                      | Nepal-Manaslu | 82.5    | no data | 0.752310 | no data | no data  | no data | no data |
| D22                        | Nepal-Manaslu | 131     | no data | 0.742750 | no data | no data  | no data | no data |
| D14                        | Nepal-Manaslu | 88      | no data | 0.745620 | no data | no data  | no data | no data |
| D37                        | Nepal-Manaslu | 81      | no data | 0.744440 | no data | 0.511819 | 15      | -15.98  |
| D45                        | Nepal-Manaslu | 58.5    | no data | 0.754780 | no data | no data  | no data | no data |
| DK200                      | Nepal-Manaslu | 108.5   | 11.6    | 0.747110 | no data | 0.511890 | 40      | -14.59  |
| DK202                      | Nepal-Manaslu | 106     | no data | 0.748650 | no data | no data  | no data | no data |
| DK203                      | Nepal-Manaslu | 105     | no data | 0.749000 | no data | no data  | no data | no data |
| DK204                      | Nepal-Manaslu | 105     | no data | 0.748730 | no data | no data  | no data | no data |
| DK205                      | Nepal-Manaslu | 107.5   | no data | 0.748870 | no data | no data  | no data | no data |
| DK206                      | Nepal-Manaslu | 106.5   | no data | 0.748680 | no data | no data  | no data | no data |
| DK207                      | Nepal-Manaslu | 104.5   | 13.4    | 0.748950 | no data | 0.511852 | 40      | -15.33  |
| DK208                      | Nepal-Manaslu | 108.5   | 15.4    | 0.748190 | no data | 0.511909 | 40      | -14.22  |
| DK209                      | Nepal-Manaslu | 102     | 13      | 0.750610 | no data | 0.511972 | 37      | -12.99  |
| DK210                      | Nepal-Manaslu | 109     | no data | 0.747810 | no data | no data  | no data | no data |
| DK244                      | Nepal-Manaslu | 111.8   | no data | 0.748570 | no data | no data  | no data | no data |
| DK168                      | Nepal-Manaslu | 39.5    | 7       | 0.771620 | no data | no data  | no data | no data |
| DK169                      | Nepal-Manaslu | 40      | no data | 0.770810 | no data | no data  | no data | no data |
| DK170                      | Nepal-Manaslu | 42.5    | no data | 0.768170 | no data | no data  | no data | no data |
| DK171                      | Nepal-Manaslu | 71      | no data | 0.764790 | no data | no data  | no data | no data |
| DK172                      | Nepal-Manaslu | 63.5    | 6.7     | 0.765100 | no data | 0.511948 | 17      | -13.46  |
| DK173                      | Nepal-Manaslu | 52      | no data | 0.765920 | no data | no data  | no data | no data |
| DK174a                     | Nepal-Manaslu | 63      | no data | 0.759570 | no data | 0.511889 | 17      | -14.61  |
| DK175                      | Nepal-Manaslu | 54.5    | 10.7    | 0.765220 | no data | 0.511932 | 21      | -13.77  |
| NL219                      | Nepal-Manaslu | 104     | no data | 0.748410 | no data | 0.511875 | 10      | -14.88  |
| NL222                      | Nepal-Manaslu | 39.5    | no data | 0.769610 | no data | no data  | no data | no data |
| NL223                      | Nepal-Manaslu | 39      | no data | 0.770310 | no data | no data  | no data | no data |
| NL224                      | Nepal-Manaslu | 54.5    | 6.2     | 0.769490 | no data | 0.511922 | 10      | -13.97  |
| NL225                      | Nepal-Manaslu | 26.5    | 2.4     | 0.767760 | no data | 0.511936 | 16      | -13.69  |
| NL226                      | Nepal-Manaslu | 37      | no data | 0.770700 | no data | no data  | no data | no data |
| NL227                      | Nepal-Manaslu | 22.5    | 2.2     | 0.781630 | no data | 0.511909 | 15      | -14.22  |
| NL206                      | Nepal-Manaslu | 77      | 4.6     | 0.742040 | no data | 0.511829 | 11      | -15.78  |
| NL207                      | Nepal-Manaslu | 71.5    | 4.9     | 0.751360 | no data | 0.511887 | 17      | -14.65  |
| NL208                      | Nepal-Manaslu | 36      | 2.3     | 0.759170 | no data | 0.511907 | 12      | -14.26  |
| NL234                      | Nepal-Manaslu | no data | 6.5     | no data  | no data | 0.511873 | 18      | -14.92  |
| U862                       | Nepal-Manaslu | no data | no data | no data  | no data | 0.511838 | 9       | -15.61  |
| NL43                       | Nepal-Manaslu | 157.5   | 39.6    | 0.747450 | no data | 0.511810 | 14      | -16.15  |
| NL58                       | Nepal-Manaslu | 132.5   | 35.8    | 0.745130 | no data | 0.511918 | 17      | -14.04  |
| NL59                       | Nepal-Manaslu | 267     | 39.9    | 0.733110 | no data | 0.511860 | 15      | -15.18  |
| NL74                       | Nepal-Manaslu | 220     | 37.7    | 0.733550 | no data | 0.511844 | 8       | -15.49  |
| NL75                       | Nepal-Manaslu | 48.5    | 22.9    | 0.754950 | no data | 0.511777 | 18      | -16.80  |
| NL76                       | Nepal-Manaslu | 249.5   | 30.2    | 0.733220 | no data | 0.511850 | 21      | -15.37  |
| NL81                       | Nepal-Manaslu | 156.5   | no data | 0.745960 | no data | no data  | no data | no data |
| NL85                       | Nepal-Manaslu | 163     | 24.2    | 0.745320 | no data | 0.511706 | 19      | -18.18  |
| NL86                       | Nepal-Manaslu | 181.5   | no data | 0.737990 | no data | no data  | no data | no data |
| NL93                       | Nepal-Manaslu | 269.5   | 20.1    | 0.734350 | no data | 0.511713 | 21      | -18.04  |
| NL100                      | Nepal-Manaslu | 210.5   | no data | 0.731130 | no data | no data  | no data | no data |
| NL172                      | Nepal-Manaslu | 225.5   | no data | 0.731140 | no data | no data  | no data | no data |
| NL499                      | Nepal-Manaslu | 104     | no data | 0.728990 | no data | no data  | no data | no data |
| NL512                      | Nepal-Manaslu | 90.5    | no data | 0.744250 | no data | no data  | no data | no data |
| $\beta$ 106                | Nepal-Manaslu | no data | 25.3    | no data  | no data | 0.511903 | 18      | -14.34  |
| $\beta$ 104                | Nepal-Manaslu | no data | 25.5    | no data  | no data | 0.511905 | 14      | -14.30  |
| U48                        | Nepal-Manaslu | no data | no data | no data  | no data | 0.511817 | 24      | -16.02  |
| France-Lanord et al., 1988 |               |         |         |          |         |          |         |         |
| NL428                      | Central Nepal | 231     | no data | 0.734586 | no data | no data  | no data | no data |
| NL623                      | Central Nepal | 772     | no data | 0.714109 | no data | no data  | no data | no data |
| D77                        | Central Nepal | 104     | no data | 0.789590 | no data | no data  | no data | no data |
| D94                        | Central Nepal | 62      | no data | 0.839590 | no data | no data  | no data | no data |
| M84                        | Central Nepal | 43      | no data | 0.881410 | no data | no data  | no data | no data |
| NA116                      | Central Nepal | 66      | no data | 0.803570 | no data | no data  | no data | no data |
| NA155                      | Central Nepal | 78      | no data | 0.776860 | no data | no data  | no data | no data |
| NA156                      | Central Nepal | 62      | no data | 0.812810 | no data | no data  | no data | no data |
| NA216                      | Central Nepal | 21      | no data | 1.063150 | no data | no data  | no data | no data |
| NA218                      | Central Nepal | 67      | no data | 0.790200 | no data | no data  | no data | no data |
| NL478                      | Central Nepal | 44      | no data | 0.883660 | no data | no data  | no data | no data |
| T200                       | Central Nepal | 161     | no data | 0.755520 | no data | no data  | no data | no data |
| U203                       | Central Nepal | 113     | no data | 0.768020 | no data | no data  | no data | no data |
| U284                       | Central Nepal | 61      | no data | 0.800690 | no data | no data  | no data | no data |
| U308                       | Central Nepal | 56      | no data | 0.839730 | no data | no data  | no data | no data |

|                                 |                |         |         |          |         |          |         |         |
|---------------------------------|----------------|---------|---------|----------|---------|----------|---------|---------|
| U725                            | Central Nepal  | 74      | no data | 0.784870 | no data | no data  | no data | no data |
| U925                            | Central Nepal  | 83      | no data | 0.796270 | no data | no data  | no data | no data |
| <u>Stern et al., 1989</u>       |                |         |         |          |         |          |         |         |
| LG1                             | Garhwal        | 3.34    | no data | 0.784160 | no data | no data  | no data | no data |
| LG2                             | Garhwal        | 30.6    | 3.75    | 0.784960 | no data | 0.511930 | no data | -13.81  |
| LG3                             | Garhwal        | 57.4    | no data | 0.763540 | no data | no data  | no data | no data |
| LG4                             | Garhwal        | 61.1    | 6.13    | 0.762990 | no data | 0.511890 | no data | -14.59  |
| LG5                             | Garhwal        | 53      | no data | 0.766940 | no data | no data  | no data | no data |
| LDG1                            | Garhwal        | 47.9    | no data | 0.778840 | no data | no data  | no data | no data |
| BG3                             | Garhwal        | 29.2    | no data | 0.799120 | no data | no data  | no data | no data |
| BG4                             | Garhwal        | 9.61    | no data | 0.830970 | no data | no data  | no data | no data |
| BG5                             | Garhwal        | 34.9    | no data | 0.792730 | no data | no data  | no data | no data |
| BG10                            | Garhwal        | 92.5    | no data | 0.763020 | no data | no data  | no data | no data |
| <u>Scaillet et al., 1990</u>    |                |         |         |          |         |          |         |         |
| GB110                           | Garhwal        | 36.8    | no data | 0.789756 | 15      | no data  | no data | no data |
| GB111                           | Garhwal        | 34.9    | no data | 0.795441 | 16      | no data  | no data | no data |
| GB117                           | Garhwal        | 48      | no data | 0.790541 | 13      | no data  | no data | no data |
| GB4                             | Garhwal        | 40.8    | no data | 0.780781 | 12      | no data  | no data | no data |
| GL11                            | Garhwal        | 27.3    | no data | 0.798640 | 30      | no data  | no data | no data |
| GL88                            | Garhwal        | 51.9    | no data | 0.778308 | 13      | no data  | no data | no data |
| GL13                            | Garhwal        | 70.7    | no data | 0.768996 | 10      | no data  | no data | no data |
| GP92                            | Garhwal        | 51.5    | no data | 0.779382 | 10      | no data  | no data | no data |
| <u>Inger et al., 1993</u>       |                |         |         |          |         |          |         |         |
| SKG8                            | Nepal-Langtang | 115.6   | no data | 0.753940 | no data | no data  | no data | no data |
| SKG9                            | Nepal-Langtang | 331.2   | no data | 0.762010 | no data | no data  | no data | no data |
| SKG12                           | Nepal-Langtang | 120.9   | 9.677   | 0.753220 | no data | 0.511900 | no data | -14.40  |
| SKG13                           | Nepal-Langtang | 41.9    | no data | 0.749710 | no data | no data  | no data | no data |
| SKG15                           | Nepal-Langtang | 159     | 16.09   | 0.737240 | no data | 0.512050 | no data | -11.47  |
| SKG3                            | Nepal-Langtang | 67.4    | no data | 0.745150 | no data | no data  | no data | no data |
| SKG4                            | Nepal-Langtang | 83      | no data | 0.745790 | no data | no data  | no data | no data |
| KG211                           | Nepal-Langtang | 58      | no data | 0.753420 | no data | no data  | no data | no data |
| KG208                           | Nepal-Langtang | 127     | 15.19   | 0.757810 | no data | 0.511740 | no data | -17.52  |
| KG210                           | Nepal-Langtang | 66      | no data | 0.749690 | no data | no data  | no data | no data |
| KG214                           | Nepal-Langtang | 144     | 16.92   | 0.757110 | no data | 0.511830 | no data | -15.76  |
| KG215                           | Nepal-Langtang | 64      | no data | 0.751060 | no data | no data  | no data | no data |
| SLM1                            | Nepal-Langtang | 54.4    | no data | 0.825450 | no data | no data  | no data | no data |
| LM201                           | Nepal-Langtang | 31      | no data | 0.783500 | no data | no data  | no data | no data |
| SKM2                            | Nepal-Langtang | 34.9    | no data | 0.803550 | no data | no data  | no data | no data |
| SKM3                            | Nepal-Langtang | 35      | no data | 0.814290 | no data | no data  | no data | no data |
| LM207                           | Nepal-Langtang | 24      | 28.8    | 0.830520 | no data | 0.511870 | no data | -14.98  |
| LM209                           | Nepal-Langtang | 46      | no data | 0.831560 | no data | no data  | no data | no data |
| LM211                           | Nepal-Langtang | 45      | no data | 0.876980 | no data | no data  | no data | no data |
| SM201                           | Nepal-Langtang | 120     | no data | 0.757680 | no data | no data  | no data | no data |
| SM203                           | Nepal-Langtang | 180     | no data | 0.750430 | no data | no data  | no data | no data |
| SM202                           | Nepal-Langtang | 132     | 29.29   | 0.752940 | no data | 0.512520 | no data | -2.30   |
| SM206                           | Nepal-Langtang | 91      | no data | 0.752630 | no data | 0.511920 | no data | -14.01  |
| SSM6                            | Nepal-Langtang | 111.3   | 38.07   | 0.762310 | no data | 0.511950 | no data | -13.42  |
| RM201                           | Nepal-Langtang | 150     | no data | 0.760750 | no data | no data  | no data | no data |
| SNM2                            | Nepal-Langtang | 131.4   | no data | 0.766090 | no data | no data  | no data | no data |
| NM203                           | Nepal-Langtang | 79      | no data | 0.772030 | no data | no data  | no data | no data |
| <u>Parrish et al., 1996</u>     |                |         |         |          |         |          |         |         |
| LT-21                           | Nepal-Langtang | no data | 34.99   | no data  | no data | 0.511826 | 15      | -15.84  |
| LT-22                           | Nepal-Langtang | no data | 45.54   | no data  | no data | 0.511878 | 14      | -14.83  |
| LT-24                           | Nepal-Langtang | no data | 43.54   | no data  | no data | 0.511816 | 12      | -16.03  |
| LT-29                           | Nepal-Langtang | no data | 30.53   | no data  | no data | 0.511691 | 8       | -18.47  |
| <u>Whittington et al., 1999</u> |                |         |         |          |         |          |         |         |
| 93/3b                           | Zanskar        | no data | no data | no data  | no data | 0.511837 | no data | -15.63  |
| 34182                           | Zanskar        | no data | no data | no data  | no data | 0.511868 | no data | -15.02  |
| 93/14b                          | Zanskar        | no data | no data | no data  | no data | 0.511906 | no data | -14.28  |
| 93/20                           | Zanskar        | no data | no data | no data  | no data | 0.512293 | no data | -6.73   |
| 93/21                           | Zanskar        | no data | no data | no data  | no data | 0.511856 | no data | -15.25  |
| 93/22                           | Zanskar        | no data | no data | no data  | no data | 0.511856 | no data | -15.25  |
| 93/24                           | Zanskar        | no data | no data | no data  | no data | 0.512256 | no data | -7.45   |
| 93/29                           | Zanskar        | no data | no data | no data  | no data | 0.512322 | no data | -6.16   |
| <u>Ahmad et al., 2000</u>       |                |         |         |          |         |          |         |         |
| C4B                             | Garwal         | no data | no data | 0.748800 | no data | 0.511860 | 5       | -15.18  |
| C7                              | Garwal         | no data | no data | 0.777970 | no data | 0.511754 | 8       | -17.24  |
| C200                            | Garwal         | no data | no data | 0.757820 | no data | 0.511675 | 8       | -18.79  |
| C230                            | Garwal         | no data | no data | 0.784400 | no data | 0.511924 | 9       | -13.93  |
| C235                            | Garwal         | no data | no data | 0.790230 | no data | 0.511702 | 12      | -18.26  |
| C34/97                          | Garwal         | no data | no data | 0.741430 | no data | 0.511700 | 8       | -18.30  |
| KR116                           | Garwal         | no data | no data | 0.751490 | no data | 0.511892 | 10      | -14.55  |
| KR118                           | Garwal         | no data | no data | 0.745130 | no data | 0.511857 | 11      | -15.23  |
| KR120                           | Garwal         | no data | no data | 0.906210 | no data | 0.511884 | 12      | -14.71  |
| KR143                           | Garwal         | no data | no data | 0.761720 | no data | 0.511670 | 13      | -18.88  |
| <u>Robinson et al., 2001</u>    |                |         |         |          |         |          |         |         |
| AG-106                          | paragneiss     | no data | 35.16   | no data  | no data | 0.511619 | 10      | -19.88  |
| AG-109                          | paragneiss     | no data | 38.69   | no data  | no data | 0.511714 | 14      | -18.02  |
| 9TBkal                          | orthogneiss    | no data | 27.92   | no data  | no data | 0.512137 | 30      | -9.77   |
| 12TBgh                          | paragneiss     | no data | 37.85   | no data  | no data | 0.511814 | 13      | -16.07  |
| 13TBru                          | paragneiss     | no data | 41.77   | no data  | no data | 0.511946 | 14      | -13.50  |
| AG-105                          | paragneiss     | no data | 8.85    | no data  | no data | 0.511836 | 14      | -15.64  |



|                              |                |         |         |          |         |          |         |         |
|------------------------------|----------------|---------|---------|----------|---------|----------|---------|---------|
| DDG-98                       | granite        | no data | 26.6    | no data  | no data | 0.512034 | 15      | -11.78  |
| DD-40                        | schist         | no data | 18.74   | no data  | no data | 0.512248 | 7       | -7.61   |
| <u>Miller et al., 2001</u>   |                |         |         |          |         |          |         |         |
| HF89/90                      | Mandi          | 254     | no data | 0.713500 | 20      | no data  | no data | no data |
| HF06/92                      | Chandra        | 54      | no data | 0.841260 | 10      | no data  | no data | no data |
| HF07/92                      | Chandra        | 77      | no data | 0.798550 | 6       | no data  | no data | no data |
| HF08/92                      | Chandra        | 46      | no data | 0.888740 | 18      | no data  | no data | no data |
| HF09/92                      | Chandra        | 67      | no data | 0.808500 | 5       | no data  | no data | no data |
| HF10/92                      | Chandra        | 13      | no data | 1.384290 | 11      | no data  | no data | no data |
| HF11/92                      | Chandra        | 29      | no data | 1.033330 | 5       | no data  | no data | no data |
| HF13/92                      | Chandra        | 56      | no data | 0.824750 | 6       | no data  | no data | no data |
| HF15/92                      | Chandra        | 52      | no data | 0.938220 | 8       | no data  | no data | no data |
| HF16/92                      | Chandra        | 85      | no data | 0.790880 | 9       | no data  | no data | no data |
| HF17/92                      | Chandra        | 68      | no data | 0.869640 | 2       | no data  | no data | no data |
| HF18/92                      | Chandra        | 89      | no data | 0.776880 | 5       | no data  | no data | no data |
| HF22/92                      | Chandra        | 87      | no data | 0.827610 | 10      | no data  | no data | no data |
| HF142/90                     | Kaplas         | 91      | no data | 0.788410 | 11      | no data  | no data | no data |
| HF143/90                     | Kaplas         | 104     | no data | 0.763070 | 12      | no data  | no data | no data |
| HF145/90                     | Kaplas         | 31      | no data | 0.897910 | 8       | no data  | no data | no data |
| PG9180                       | Kaplas         | 94      | no data | 0.769500 | 5       | no data  | no data | no data |
| PG9136                       | Kaplas         | 48      | no data | 0.869100 | 8       | no data  | no data | no data |
| PG9137                       | Kaplas         | 49      | no data | 0.862900 | 7       | no data  | no data | no data |
| HF68/91                      | Nyimaling      | 76      | no data | 0.795870 | 12      | no data  | no data | no data |
| HF69/91                      | Nyimaling      | 43      | no data | 0.903620 | 11      | no data  | no data | no data |
| HF70/91                      | Nyimaling      | 65      | no data | 0.821620 | 132     | no data  | no data | no data |
| HF01/91                      | Hanumantibba   | 154     | no data | 0.742430 | 1       | no data  | no data | no data |
| WAP28                        | Chamba         | 79      | no data | 0.805950 | 80      | no data  | no data | no data |
| HF29/92                      | Kinnaur        | 85      | no data | 0.764430 | 1       | no data  | no data | no data |
| HF30/92                      | Kinnaur        | 123     | no data | 0.752420 | 6       | no data  | no data | no data |
| HF31/92                      | Kinnaur        | 115     | no data | 0.747590 | 1       | no data  | no data | no data |
| HF32/92                      | Kinnaur        | 51      | no data | 0.821640 | 12      | no data  | no data | no data |
| KAW883                       | Mandi          | 14      | 14.5    | 1.213000 | 25      | 0.511949 | 7       | -13.44  |
| HF67/91                      | Mandi          | 21      | 14.9    | 1.175800 | 7       | 0.511954 | 9       | -13.34  |
| HF63/91                      | Mandi          | 114     | 53.6    | 0.761560 | 7       | 0.511927 | 11      | -13.87  |
| HF64/91                      | Mandi          | 152     | no data | 0.756030 | 13      | no data  | no data | no data |
| HF94/90                      | Mandi          | 196     | no data | 0.724800 | 11      | no data  | no data | no data |
| HF66b/91                     | Mandi          | 244     | 21.7    | 0.711740 | 7       | 0.512327 | 8       | -6.07   |
| HF59/91                      | Mandi          | 249     | 17.4    | 0.708120 | 9       | 0.512569 | 12      | -1.35   |
| HF61/91                      | Mandi          | 275     | 9.9     | 0.705470 | 10      | 0.512531 | 12      | -2.09   |
| HF61/91                      | Mandi          | no data | 1.5     | no data  | no data | 0.512380 | 6       | -5.03   |
| HF61/91                      | Mandi          | no data | 9       | no data  | no data | 0.512786 | 6       | 2.89    |
| HF92/90                      | Mandi          | 228     | no data | 0.712000 | 13      | no data  | no data | no data |
| HF95/90                      | Mandi          | 270     | no data | 0.707500 | 3       | no data  | no data | no data |
| HB06/97                      | Kinnaur Kailas | 42      | 7.7     | 0.893940 | 9       | 0.511891 | 13      | -14.57  |
| HB18/97                      | Kinnaur Kailas | 106     | 39.6    | 0.757030 | 7       | 0.512037 | 3       | -11.72  |
| HF05/92                      | Chandra        | 64      | 32.7    | 0.828490 | 7       | 0.511963 | 6       | -13.17  |
| HF73/91                      | Nyimaling      |         | 25.2    | no data  | no data | 0.511981 | 5       | -12.82  |
| HF144/90                     | Kaplas         | 74      | 75.4    | 0.818450 | 20      | 0.511836 | 6       | -15.64  |
| WAP25                        | Hanumantibba   | 114     | 20.3    | 0.747400 | 80      | 0.511920 | 8       | -14.01  |
| T41                          | Jaspa          | 31      | 9.5     | 1.026450 | 80      | 0.512020 | 11      | -12.06  |
| WAP2071                      | Dhali          | 64      | 34.5    | 0.763990 | 41      | 0.511850 | 4       | -15.37  |
| WAP2072                      | Mashobra       | 99      | 34.1    | 0.744740 | 14      | 0.511940 | 4       | -13.62  |
| WAP2075                      | Khanderghat    | 52      | 71.5    | 0.773120 | 8       | 0.511765 | 10      | -17.03  |
| WAP2076                      | Naldera        | 113     | 25.4    | 0.728090 | 9       | 0.511872 | 6       | -14.94  |
| <u>Martin et al., 2005</u>   |                |         |         |          |         |          |         |         |
| 502068                       | Annapurna      | no data | 35.38   | no data  | no data | 0.511877 | 6       | -14.84  |
| 502069                       | Annapurna      | no data | 20.23   | no data  | no data | 0.511737 | 6       | -17.58  |
| 502070                       | Annapurna      | no data | 33.01   | no data  | no data | 0.511843 | 8       | -15.51  |
| 502071                       | Annapurna      | no data | 36.52   | no data  | no data | 0.511779 | 6       | -16.76  |
| 502072                       | Annapurna      | no data | no data | no data  | no data | no data  |         | no data |
| 502104                       | Annapurna      | no data | 29.63   | no data  | no data | 0.511935 | 8       | -13.71  |
| 502105A                      | Annapurna      | no data | 34.09   | no data  | no data | 0.511897 | 5       | -14.45  |
| 502105B                      | Annapurna      | no data | 37.89   | no data  | no data | 0.511783 | 6       | -16.68  |
| 502106                       | Annapurna      | no data | 28.86   | no data  | no data | 0.511950 | 6       | -13.42  |
| 502107                       | Annapurna      | no data |         | no data  | no data | no data  |         | no data |
| 502128                       | Annapurna      | no data | 41.3    | no data  | no data | 0.511804 | 5       | -16.27  |
| 502129                       | Annapurna      | no data | 35.95   | no data  | no data | 0.511868 | 6       | -15.02  |
| 502133                       | Annapurna      | no data | 29.84   | no data  | no data | 0.511933 | 6       | -13.75  |
| 502132                       | Annapurna      | no data | 29.91   | no data  | no data | 0.511908 | 6       | -14.24  |
| 502152                       | Annapurna      | no data | 28.85   | no data  | no data | 0.511903 | 6       | -14.34  |
| 502149                       | Annapurna      | no data | 36.33   | no data  | no data | 0.511922 | 7       | -13.97  |
| 502148                       | Annapurna      | no data | 43.6    | no data  | no data | 0.511818 | 7       | -16.00  |
| 502147                       | Annapurna      | no data | 37.84   | no data  | no data | 0.511741 | 7       | -17.50  |
| 402086                       | Annapurna      | no data | 30.81   | no data  | no data | 0.511928 | 7       | -13.85  |
| 402088                       | Annapurna      | no data | 46.04   | no data  | no data | 0.511790 | 5       | -16.54  |
| 402090                       | Annapurna      | no data | 28.01   | no data  | no data | 0.511671 | 7       | -18.86  |
| 402092A                      | Annapurna      | no data | 8.5     | no data  | no data | 0.511691 | 6       | -18.47  |
| 402092B                      | Annapurna      | no data | 26.2    | no data  | no data | 0.511753 | 7       | -17.26  |
| <u>Richards et al., 2005</u> |                |         |         |          |         |          |         |         |
| W6                           | Sutlej Valley  | 135     | 29.9    | 0.742983 | 445     | 0.511737 | 11      | -17.58  |
| W30.1                        | Sutlej Valley  | 76.3    | 47.6    | 0.775211 | 8       | 0.512224 | 8       | -8.08   |
| W35                          | Sutlej Valley  | 120     | 31.2    | 0.750056 | 128     | 0.511829 | 5       | -15.78  |



|                      |               |         |       |          |         |          |         |        |
|----------------------|---------------|---------|-------|----------|---------|----------|---------|--------|
| W36                  | Sutlej Valley | 86      | 32.4  | 0.742343 | 8       | 0.511963 | 6       | -13.17 |
| W41                  | Sutlej Valley | 122     | 29.7  | 0.743193 | 6       | 0.511977 | 8       | -12.89 |
| W43                  | Sutlej Valley | 51.3    | 40.5  | 0.769374 | 8       | 0.511791 | 8       | -16.52 |
| W44                  | Sutlej Valley | 121     | 23.3  | 0.749676 | 8       | 0.511830 | 6       | -15.76 |
| W45                  | Sutlej Valley | 72.7    | 22.2  | 0.731099 | 98      | 0.511809 | 9       | -16.17 |
| Imayama et al., 2008 |               |         |       |          |         |          |         |        |
| HE 5                 | eastern Nepal | no data | 20.23 | no data  | no data | 0.511967 | 1.2E-05 | -13.09 |
| HE13                 | eastern Nepal | no data | 13.97 | no data  | no data | 0.511708 | 2.9E-05 | -18.14 |
| HE14                 | eastern Nepal | no data | 32.35 | no data  | no data | 0.511872 | 1.4E-05 | -14.94 |
| HE17                 | eastern Nepal | no data | 28.42 | no data  | no data | 0.511741 | 1.8E-05 | -17.50 |
| HE18                 | eastern Nepal | no data | 24.73 | no data  | no data | 0.511798 | 1.3E-05 | -16.39 |
| HE24                 | eastern Nepal | no data | 18.73 | no data  | no data | 0.511714 | 1.2E-05 | -18.02 |
| HE25                 | eastern Nepal | no data | 34    | no data  | no data | 0.512123 | 1.1E-05 | -10.05 |
| HE26                 | eastern Nepal | no data | 11.22 | no data  | no data | 0.511808 | 1.3E-05 | -16.19 |
| HE32                 | eastern Nepal | no data | 57.99 | no data  | no data | 0.511720 | 1.1E-05 | -17.91 |
| HE68                 | eastern Nepal | no data | 28.69 | no data  | no data | 0.511802 | 8E-06   | -16.31 |
| HE71                 | eastern Nepal | no data | 29.17 | no data  | no data | 0.511724 | 0.00001 | -17.83 |
| HE76                 | eastern Nepal | no data | 45.49 | no data  | no data | 0.511831 | 1.1E-05 | -15.74 |
| HE77                 | eastern Nepal | no data | 30.26 | no data  | no data | 0.511713 | 0.00002 | -18.04 |
| HC46                 | Central Nepal | no data | 33.33 | no data  | no data | 0.511928 | 1.7E-05 | -13.85 |
| HC47                 | Central Nepal | no data | 28.22 | no data  | no data | 0.511766 | 1.8E-05 | -17.01 |
| HW8                  | Western Nepal | no data | 30.51 | no data  | no data | 0.511756 | 5.3E-05 | -17.21 |
| HW9                  | Western Nepal | no data | 29.62 | no data  | no data | 0.511733 | 1.3E-05 | -17.65 |
| HW36                 | Western Nepal | no data | 29.04 | no data  | no data | 0.511898 | 1.4E-05 | -14.44 |

Table DR10 Compiled Nd-Sr isotopic compositions from sediment sources in the Indus River drainage basin (LHS)

| Sample name                       | Formation       | Sr (ppm) | Nd (ppm) | $^{87}\text{Sr}/^{86}\text{Sr}$ | SE      | $^{143}\text{Nd}/^{144}\text{Nd}$ | SE      | $\epsilon_{\text{Nd}}$ |
|-----------------------------------|-----------------|----------|----------|---------------------------------|---------|-----------------------------------|---------|------------------------|
| <u>France-Lanord et al., 1988</u> |                 |          |          |                                 |         |                                   |         |                        |
| AP9                               | Central Nepal   | 11       | no data  | 1.509800                        | no data | no data                           | no data | no data                |
| AP346                             | Central Nepal   | 21       | no data  | 1.680900                        | no data | no data                           | no data | no data                |
| AP385                             | Central Nepal   | 63       | no data  | 1.030100                        | no data | no data                           | no data | no data                |
| AP440                             | Central Nepal   | 83       | no data  | 0.833180                        | no data | no data                           | no data | no data                |
| AP524                             | Central Nepal   | 76       | no data  | 0.964110                        | no data | no data                           | no data | no data                |
| AP825                             | Central Nepal   | 74       | no data  | 0.825730                        | no data | no data                           | no data | no data                |
| AP874                             | Central Nepal   | 56       | no data  | 1.017610                        | no data | no data                           | no data | no data                |
| AP888                             | Central Nepal   | 44       | no data  | 0.899640                        | no data | no data                           | no data | no data                |
| NL1                               | Central Nepal   | 19       | no data  | 0.936960                        | no data | no data                           | no data | no data                |
| NL3                               | Central Nepal   | 7        | no data  | 0.867720                        | no data | no data                           | no data | no data                |
| NL4                               | Central Nepal   | 55       | no data  | 0.939430                        | no data | no data                           | no data | no data                |
| <u>France-Lanord et al., 1993</u> |                 |          |          |                                 |         |                                   |         |                        |
| AP 346                            | Central Nepal   | 11.1     | 44       | 1.680900                        | no data | 0.511397                          | 28      | -24.21                 |
| AP 385                            | Central Nepal   | 63       | 36       | 1.030100                        | no data | 0.511331                          | 25      | -25.50                 |
| <u>Parrish et al., 1996</u>       |                 |          |          |                                 |         |                                   |         |                        |
| LT-4                              | Nepal-Langtang  | no data  | 26.36    | no data                         | no data | 0.511356                          | 10      | -25.01                 |
| LT-6                              | Nepal-Langtang  | no data  | 31.96    | no data                         | no data | 0.511348                          | 14      | -25.16                 |
| LT-7                              | Nepal-Langtang  | no data  | 54.75    | no data                         | no data | 0.511429                          | 14      | -23.58                 |
| LT-10                             | Nepal-Langtang  | no data  | 38.68    | no data                         | no data | 0.511330                          | 6       | -25.52                 |
| LT-18                             | Nepal-Langtang  | no data  | 43.34    | no data                         | no data | 0.511296                          | 29      | -26.18                 |
| LT-19                             | Nepal-Langtang  | no data  | 38.13    | no data                         | no data | 0.511423                          | 7       | -23.70                 |
| <u>Ahmad et al., 2000</u>         |                 |          |          |                                 |         |                                   |         |                        |
| KR82                              | Garwal-Inner LH | no data  | no data  | 0.824510                        | no data | 0.511466                          | 6       | -22.86                 |
| KR113                             | Garwal-Inner LH | no data  | no data  | 1.047000                        | no data | 0.511367                          | 10      | -24.79                 |
| KR122                             | Garwal-Inner LH | no data  | no data  | 0.736920                        | no data | 0.511218                          | 8       | -27.70                 |
| KR124                             | Garwal-Inner LH | no data  | no data  | 0.920490                        | no data | 0.511319                          | 10      | -25.73                 |
| KR126                             | Garwal-Inner LH | no data  | no data  | 0.877940                        | no data | 0.511328                          | 10      | -25.55                 |
| KR128                             | Garwal-Inner LH | no data  | no data  | 0.980430                        | no data | 0.511392                          | 10      | -24.31                 |
| KR130                             | Garwal-Inner LH | no data  | no data  | 0.829400                        | no data | 0.511444                          | 8       | -23.29                 |
| KR134                             | Garwal-Inner LH | no data  | no data  | 1.043680                        | no data | 0.511402                          | 14      | -24.11                 |
| KR52                              | Garwal-Inner LH | no data  | no data  | 0.922380                        | no data | 0.511382                          | 8       | -24.50                 |
| KR57                              | Garwal-Inner LH | no data  | no data  | 0.930000                        | no data | 0.511394                          | 20      | -24.27                 |
| KR1                               | Garwal-Inner LH | no data  | no data  | 0.733090                        | no data | 0.511378                          | 9       | -24.58                 |
| KR4                               | Garwal-Inner LH | no data  | no data  | 0.741230                        | no data | 0.511357                          | 6       | -24.99                 |
| KR102                             | Garwal-Inner LH | no data  | no data  | 0.930850                        | no data | 0.511563                          | 16      | -20.97                 |
| KR85                              | Garwal-Inner LH | no data  | no data  | 0.732920                        | no data | 0.511575                          | 10      | -20.74                 |
| KR106                             | Garwal-Inner LH | no data  | no data  | 1.176450                        | no data | 0.511342                          | 6       | -25.28                 |
| KR132                             | Garwal-Inner LH | no data  | no data  | 0.715820                        | no data | 0.511676                          | 20      | -18.77                 |
| KR38                              | Garwal-Outer LH | no data  | no data  | 0.823030                        | no data | 0.511713                          | 8       | -18.04                 |
| KR40                              | Garwal-Outer LH | no data  | no data  | 0.770910                        | no data | 0.511709                          | 6       | -18.12                 |
| KR41                              | Garwal-Outer LH | no data  | no data  | 0.800360                        | no data | 0.511723                          | 12      | -17.85                 |
| KR44                              | Garwal-Outer LH | no data  | no data  | 0.815050                        | no data | 0.511713                          | 20      | -18.04                 |
| KR50                              | Garwal-Outer LH | no data  | no data  | 0.749930                        | no data | 0.511768                          | 9       | -16.97                 |
| KR146                             | Garwal-Outer LH | no data  | no data  | 0.799300                        | no data | 0.511702                          | 9       | -18.26                 |
| <u>Robinson et al., 2001</u>      |                 |          |          |                                 |         |                                   |         |                        |
| K1-99                             | shale           | no data  | 29.93    | no data                         | no data | 0.511343                          | 14      | -25.26                 |
| SR-37                             | shale           | no data  | 20       | no data                         | no data | 0.511630                          | 12      | -19.66                 |
| SR-35                             | shale           | no data  | 27.79    | no data                         | no data | 0.511575                          | 11      | -20.74                 |
| DD-58                             | shale           | no data  | 42.22    | no data                         | no data | 0.511430                          | 11      | -23.56                 |
| 23TBtu                            | shale           | no data  | 33.15    | no data                         | no data | 0.511630                          | 26      | -19.66                 |
| 23TBSe                            | phyllite        | no data  | 37.03    | no data                         | no data | 0.511339                          | 11      | -25.34                 |
| CH-1                              | phyllite        | no data  | 16.16    | no data                         | no data | 0.511460                          | 15      | -22.98                 |
| DD-15                             | phyllite        | no data  | 52.32    | no data                         | no data | 0.511741                          | 25      | -17.50                 |
| 22TBPu                            | shale           | no data  | 37.77    | no data                         | no data | 0.511711                          | 13      | -18.08                 |
| 24TBLi                            | phyllite        | no data  | 65.18    | no data                         | no data | 0.511521                          | 11      | -21.79                 |
| K3-99                             | shale           | no data  | 18.42    | no data                         | no data | 0.511557                          | 9       | -21.09                 |
| DD-52                             | shale           | no data  | 49.94    | no data                         | no data | 0.511822                          | 12      | -15.92                 |
| 20TBSI                            | shale           | no data  | 47.63    | no data                         | no data | 0.511444                          | 8       | -23.29                 |
| 18TBBra                           | shale           | no data  | 38.76    | no data                         | no data | 0.511333                          | 42      | -25.46                 |
| K2-99                             | phyllite        | no data  | 34.82    | no data                         | no data | 0.511369                          | 15      | -24.75                 |
| AG-103                            | phyllite        | no data  | 35.31    | no data                         | no data | 0.511518                          | 10      | -21.85                 |
| AG-104                            | phyllite        | no data  | 21.22    | no data                         | no data | 0.511370                          | 12      | -24.73                 |
| SR-30                             | gneiss          | no data  | 25.11    | no data                         | no data | 0.511647                          | 8       | -19.33                 |
| AG-111                            | gneiss          | no data  | 21.96    | no data                         | no data | 0.511652                          | 14      | -19.23                 |
| AG-112                            | gneiss          | no data  | 25.72    | no data                         | no data | 0.511571                          | 11      | -20.81                 |
| <u>Richards et al., 2005</u>      |                 |          |          |                                 |         |                                   |         |                        |
| W50                               | Sutlej Valley   | 120      | 36.4     | 0.963838                        | 12      | 0.511512                          | 8       | -21.96                 |
| W54                               | Sutlej Valley   | 108      | 62.4     | 0.884525                        | 8       | 0.511452                          | 8       | -23.14                 |
| W58                               | Sutlej Valley   | 0.5      | 3.5      | 0.782417                        | 24      | 0.511446                          | 12      | -23.25                 |
| W59                               | Sutlej Valley   | 44.8     | 40.1     | 1.243816                        | 10      | 0.511471                          | 8       | -22.76                 |
| W60                               | Sutlej Valley   | 103      | 30.6     | 0.874373                        | 8       | 0.511579                          | 8       | -20.66                 |
| W63                               | Sutlej Valley   | 20.6     | 49.2     | 1.041275                        | 10      | 0.511427                          | 8       | -23.62                 |
| W64                               | Sutlej Valley   | 42.3     | 41.7     | 0.949561                        | 100     | 0.511273                          | 8       | -26.63                 |
| W65                               | Sutlej Valley   | 125      | 69.5     | 0.837226                        | 8       | 0.511381                          | 8       | -24.52                 |
| W70                               | Sutlej Valley   | 116      | 25.5     | 0.775567                        | 161     | 0.511906                          | 44      | -14.28                 |
| W77                               | Sutlej Valley   | 84.2     | 33.1     | 0.752650                        | 10      | 0.512099                          | 8       | -10.51                 |

|                             |               |         |         |          |         |          |          |         |
|-----------------------------|---------------|---------|---------|----------|---------|----------|----------|---------|
| W78                         | Sutlej Valley | 94.5    | 41.4    | 0.763873 | 87      | 0.511795 | 6        | -16.44  |
| W79                         | Sutlej Valley | 21.9    | 14.2    | 0.945092 | 10      | 0.512069 | 8        | -11.10  |
| W80                         | Sutlej Valley | 76.7    | 32.3    | 0.769608 | 8       | 0.511936 | 6        | -13.69  |
| W83                         | Sutlej Valley | 64.4    | 47.6    | 0.803975 | 8       | 0.511807 | 8        | -16.21  |
| W87                         | Sutlej Valley | 94      | 55      | 0.760474 | 6       | 0.512012 | 8        | -12.21  |
| W88                         | Sutlej Valley | 35.1    | 43.8    | 0.830286 | 80      | 0.511951 | 6        | -13.40  |
| W91                         | Sutlej Valley | 51.5    | 28.3    | 0.750875 | 100     | 0.512015 | 8        | -12.15  |
| W100                        | Sutlej Valley | 48.2    | 37.1    | 0.818893 | 8       | 0.511830 | 6        | -15.76  |
| <u>Martin et al., 2005</u>  |               |         |         |          |         |          |          |         |
| 502073                      | Annapurna     | no data | no data | no data  | no data | no data  |          | no data |
| 502075                      | Annapurna     | no data | 8.32    | no data  | no data | 0.511592 | 5        | -20.40  |
| 502108                      | Annapurna     | no data | 35.16   | no data  | no data | 0.511548 | 6        | -21.26  |
| 502097                      | Annapurna     | no data | 25.98   | no data  | no data | 0.511428 | 7        | -23.60  |
| 502130                      | Annapurna     | no data | 29      | no data  | no data | 0.511616 | 6        | -19.94  |
| 502134                      | Annapurna     | no data |         | no data  | no data | no data  |          | no data |
| 502131                      | Annapurna     | no data | 15.34   | no data  | no data | 0.511568 | 7        | -20.87  |
| 502136                      | Annapurna     | no data | 21.94   | no data  | no data | 0.511477 | 6        | -22.65  |
| 502146                      | Annapurna     | no data | 32.08   | no data  | no data | 0.511440 | 7        | -23.37  |
| 602002                      | Annapurna     | no data | 40.92   | no data  | no data | 0.511462 | 6        | -22.94  |
| 402093                      | Annapurna     | no data | 28.95   | no data  | no data | 0.511449 | 6        | -23.19  |
| 402097                      | Annapurna     | no data | 37.52   | no data  | no data | 0.511384 | 6        | -24.46  |
| <u>Imayama et al., 2008</u> |               |         |         |          |         |          |          |         |
| ME11                        | eastern Nepal | no data | 24.89   | no data  | no data | 0.511600 | 0.000016 | -20.25  |
| ME12                        | eastern Nepal | no data | 67.81   | no data  | no data | 0.511688 | 0.000015 | -18.53  |
| ME15                        | eastern Nepal | no data | 40.2    | no data  | no data | 0.511513 | 0.000012 | -21.95  |
| ME16                        | eastern Nepal | no data | 20.95   | no data  | no data | 0.511630 | 0.000014 | -19.66  |
| ME19                        | eastern Nepal | no data | 46.03   | no data  | no data | 0.511444 | 0.000012 | -23.29  |
| ME22                        | eastern Nepal | no data | 32.65   | no data  | no data | 0.511293 | 0.000018 | -26.24  |
| ME23                        | eastern Nepal | no data | 27.71   | no data  | no data | 0.511502 | 0.000014 | -22.16  |
| ME75                        | eastern Nepal | no data | 44.27   | no data  | no data | 0.511327 | 0.000026 | -25.57  |
| ME76                        | eastern Nepal | no data | no data | no data  | no data | 0.511478 | 0.000023 | -22.63  |
| LE20                        | eastern Nepal | no data | 25.34   | no data  | no data | 0.511259 | 0.000025 | -26.90  |
| LE21                        | eastern Nepal | no data | 11.7    | no data  | no data | 0.511334 | 0.000012 | -25.44  |
| LE28                        | eastern Nepal | no data | 43.5    | no data  | no data | 0.511275 | 0.000014 | -26.59  |
| LE78                        | eastern Nepal | no data | 64.81   | no data  | no data | 0.511322 | 0.000013 | -25.67  |
| LE79                        | eastern Nepal | no data | 34.72   | no data  | no data | 0.511512 | 0.000012 | -21.96  |
| LE10                        | eastern Nepal | no data | 37.9    | no data  | no data | 0.511757 | 0.000017 | -17.19  |
| MC49                        | Central Nepal | no data | 29.69   | no data  | no data | 0.511312 | 0.000031 | -25.87  |
| MC69                        | Central Nepal | no data | 9.06    | no data  | no data | 0.511420 | 0.000018 | -23.76  |
| MC74                        | Central Nepal | no data | 36.79   | no data  | no data | 0.511296 | 0.000033 | -26.18  |
| LC50                        | Central Nepal | no data | 24.81   | no data  | no data | 0.511328 | 0.000011 | -25.55  |
| LC70                        | Central Nepal | no data | 13.96   | no data  | no data | 0.511357 | 0.000013 | -24.99  |
| LC71                        | Central Nepal | no data | 35.37   | no data  | no data | 0.511342 | 0.000013 | -25.28  |
| LC72                        | Central Nepal | no data | 25.16   | no data  | no data | 0.511340 | 0.000015 | -25.32  |
| LC73                        | Central Nepal | no data | 29.2    | no data  | no data | 0.511340 | 0.000014 | -25.32  |
| LC53                        | Central Nepal | no data | 10.37   | no data  | no data | 0.511439 | 0.00001  | -23.39  |
| LC54                        | Central Nepal | no data | 35.78   | no data  | no data | 0.511619 | 0.000011 | -19.88  |
| LC55                        | Central Nepal | no data | 25.75   | no data  | no data | 0.511518 | 0.00002  | -21.85  |
| LC56                        | Central Nepal | no data | 34.4    | no data  | no data | 0.511515 | 0.000015 | -21.91  |
| LC57                        | Central Nepal | no data | 23.16   | no data  | no data | 0.511614 | 0.000014 | -19.98  |
| MW7                         | Western Nepal | no data | 35.24   | no data  | no data | 0.511379 | 0.000016 | -24.56  |
| MW35                        | Western Nepal | no data | 47.12   | no data  | no data | 0.512005 | 0.00001  | -12.35  |
| MW38                        | Western Nepal | no data | 38.44   | no data  | no data | 0.511419 | 0.000014 | -23.78  |
| MW61                        | Western Nepal | no data | 41.38   | no data  | no data | 0.511348 | 0.000016 | -25.16  |
| LW4                         | Western Nepal | no data | 17.72   | no data  | no data | 0.511313 | 0.000024 | -25.85  |
| LW5                         | Western Nepal | no data | 30.42   | no data  | no data | 0.511342 | 0.000011 | -25.28  |
| LW62                        | Western Nepal | no data | 5.89    | no data  | no data | 0.511263 | 0.000018 | -26.82  |
| LW64                        | Western Nepal | no data | 1.51    | no data  | no data | 0.511348 | 0.000026 | -25.16  |
| LW65                        | Western Nepal | no data | 27.53   | no data  | no data | 0.511306 | 0.000014 | -25.98  |
| LW68                        | Western Nepal | no data | 4.2     | no data  | no data | 0.511364 | 0.000017 | -24.85  |
| LW39                        | Western Nepal | no data | 31.53   | no data  | no data | 0.511374 | 0.000012 | -24.66  |
| LW40                        | Western Nepal | no data | 16.81   | no data  | no data | 0.511420 | 0.000014 | -23.76  |
| LW43                        | Western Nepal | no data | 22.93   | no data  | no data | 0.511838 | 0.000013 | -15.61  |
| LW63                        | Western Nepal | no data | no data | no data  | no data | 0.511262 | 0.000025 | -26.84  |

Table DR10 Compiled Nd-Sr isotopic compositions from sediment sources in the Indus River drainage basin (THS)

| Sample name                        | Formation     | Sr (ppm) | Nd (ppm) | $^{87}\text{Sr}/^{86}\text{Sr}$ | SE      | $^{143}\text{Nd}/^{144}\text{Nd}$ | SE  | $\epsilon_{\text{Nd}}$ |
|------------------------------------|---------------|----------|----------|---------------------------------|---------|-----------------------------------|-----|------------------------|
| <u>France-Lanord et al., 1993</u>  |               |          |          |                                 |         |                                   |     |                        |
| NA 178 Jurassic schist             |               | no data  | 20.3     | no data                         | no data | 0.511795                          | 28  | -16.44                 |
| NA 181 Cretaceous (Volcaniclastic) |               | no data  | 59       | no data                         | no data | 0.512405                          | 28  | -4.55                  |
| 87 28 Cretaceous                   |               | 61       | 45.5     | 0.712660                        | no data | 0.512093                          | 13  | -10.63                 |
| 87 32 Trias                        |               | 45       | 18.6     | 0.708990                        | no data | 0.511824                          | 17  | -15.88                 |
| LA 194 Indus Margin                |               | 299      | 33.2     | 0.709810                        | no data | 0.511883                          | 9   | -14.73                 |
| LA 158 Indus Margin                |               | 50       | 23.2     | 0.729030                        | no data | 0.512046                          | 37  | -11.55                 |
| 25 1 suture Ladak                  |               | 662      | 6.4      | 0.707620                        | no data | 0.512313                          | 34  | -6.34                  |
| 89 1 suture Ladak                  |               | 258      | 13.9     | 0.706060                        | no data | 0.512580                          | 24  | -1.13                  |
| <u>Robinson et al., 2001</u>       |               |          |          |                                 |         |                                   |     |                        |
| 1TBkag                             | Cental-Nepal  | no data  | 84.95    | no data                         | no data | 0.512322                          | 31  | -6.16                  |
| 2TBpha                             | Cental-Nepal  | no data  | 33.22    | no data                         | no data | 0.511805                          | 15  | -16.25                 |
| 3TBjom                             | Cental-Nepal  | no data  | 53.17    | no data                         | no data | 0.511673                          | 12  | -18.82                 |
| 4TBSya                             | Cental-Nepal  | no data  | 63.38    | no data                         | no data | 0.511671                          | 9   | -18.86                 |
| 5TBMar                             | Cental-Nepal  | no data  | 64.5     | no data                         | no data | 0.511750                          | 11  | -17.32                 |
| DD-31                              | Western Nepal | no data  | 29.59    | no data                         | no data | 0.511734                          | 7   | -17.63                 |
| DD-33                              | Western Nepal | no data  | 35.99    | no data                         | no data | 0.511610                          | 9   | -20.05                 |
| <u>Richards et al., 2005</u>       |               |          |          |                                 |         |                                   |     |                        |
| W3                                 | Sutlej Valley | 46.4     | 32.7     | 0.764614                        | 8       | 0.511672                          | 6   | -18.84                 |
| W18                                | Sutlej Valley | 297      | 25.7     | 0.734092                        | 8       | 0.511769                          | 8   | -16.95                 |
| W19                                | Sutlej Valley | 99.7     | 34       | 0.763873                        | 161     | 0.511919                          | 13  | -14.03                 |
| W25                                | Sutlej Valley | 229      | 13       | 0.736614                        | 83      | 0.512238                          | 136 | -7.80                  |
| ED96/32                            | Sutlej Valley | 93       | 33.7     | 0.763114                        | 45      | 0.511903                          | 13  | -14.34                 |
| ED96/33                            | Sutlej Valley | 38       | 43.6     | 0.793694                        | 35      | 0.511766                          | 19  | -17.01                 |
| ED96/57                            | Sutlej Valley | 61       | 25.7     | 0.777697                        | 54      | 0.511796                          | 16  | -16.42                 |
| ED96/58                            | Sutlej Valley | 87       | 33.3     | 0.755977                        | 41      | 0.512023                          | 10  | -12.00                 |
| ED96/74                            | Sutlej Valley | 67       | 25       | 0.779018                        | 35      | 0.511946                          | 17  | -13.50                 |
| ED96/83                            | Sutlej Valley | 53       | 25.7     | 0.780820                        | 38      | 0.511841                          | 16  | -15.55                 |
| ED96/91                            | Sutlej Valley | 63       | 32.3     | 0.771796                        | 47      | 0.511941                          | 8   | -13.60                 |
| ED96/99                            | Sutlej Valley | 85       | 46.8     | 0.759204                        | 41      | 0.511919                          | 18  | -14.03                 |
| <u>Miller et al., 2001</u>         |               |          |          |                                 |         |                                   |     |                        |
| WAP2069                            | NW Tindi      | 89       | 32.9     | 0.762680                        | 10      | 0.511935                          | 2   | -13.71                 |
| WAP2070                            | Miyar Tindi   | 154      | 40.9     | 0.750090                        | 14      | 0.511676                          | 3   | -18.77                 |
| WAP2073                            | NE Marwa      | 197      | 40       | 0.741650                        | 8       | 0.512058                          | 7   | -11.31                 |
| WAP2074                            | E Udaipur     | 268      | 38.5     | 0.734500                        | 5       | 0.511685                          | 5   | -18.59                 |
| <u>Ahmad et al., 2000</u>          |               |          |          |                                 |         |                                   |     |                        |
| C29/97                             | Garwal        | no data  | no data  | 0.772290                        | no data | 0.511944                          | 8   | -13.54                 |

## Referecnes

- Ahmad, T., Harris, N.B.W., Bickle, M., Chapman, H., Bunbury, J., and Prince, C., 2000, Isotopic constraints on the structural relationships between the Lesser Himalayan Series and the High Himalayan Crystalline Series, Garhwal Himalaya: Geological Society of America Bulletin, v. 112, no. 3, p. 467–477, doi: 10.1130/0016-7606(2000)112<467:ICOTSR>2.0.CO;2.
- Allegre, C.J., and Othman, D.B., 1980, Nd–Sr isotopic relationship in granitoid rocks and continental crust development: a chemical approach to orogenesis: *Nature*, v. 286, no. 5771, p. 335–342, doi: 10.1038/286335a0.
- Bignold, S.M., and Treloar, P.J., 2003, Northward subduction of the Indian Plate beneath the Kohistan island arc, Pakistan Himalaya: new evidence from isotopic data: *Journal of the Geological Society*, v. 160, p. 377–384.
- Debon, F., Le Fort, P., Dautel, D., Sonet, J., and Zimmermann, J.L., 1987, Granites of western Karakorum and northern Kohistan (Pakistan): A composite mid-Cretaceous to upper Cenozoic magmatism: *Lithos*, v. 20, no. 1, p. 19–40, doi: 10.1016/0024-4937(87)90022-3.
- Deniel, C., Vidal, P., Fernandez, A., Le Fort, P., and Peucat, J.J., 1987, Isotopic study of the Manaslu granite (Himalaya, Nepal): inferences on the age and source of Himalayan leucogranites: *Contributions to Mineralogy and Petrology*, v. 96, no. 1, p. 78–92, doi: 10.1007/BF00375529.
- Ferrara, G., Tonarini, S., and Lombardo, B., 1983, Rb/Sr geochronology of granites and gneisses from the Mount Everest region, Nepal Himalaya: *Geologische Rundschau*, v. 72, no. 1, p. 119–136.
- France-Lanord, C., and Le Fort, P., 1988, Crustal melting and granite genesis during the Himalayan collision orogenesis: *Transactions of The Royal Society of Edinburgh: Earth Sciences*, v. 79, no. 2-3, p. 183–195, doi: 10.1017/S0263593300014206.
- France-Lanord, C., Derry, L., and Michard, A., 1993, Evolution of the Himalaya since Miocene time: isotopic and sedimentological evidence from the Bengal Fan: *Geological Society, London, Special Publications*, v. 74, no. 1, p. 603–621, doi: 10.1144/GSL.SP.1993.074.01.40.
- Gazis, C.A., Blum, J.D., and Chamberlain, C.P., 1998, Isotope systematics of granites and gneisses of the Nanga Parbat Massif, Pakistan Himalaya: *American Journal of Science*, v. 298, p. 673–698.
- George, M.T., and Harris, N., 1993, The tectonic implications of contrasting granite magmatism between the Kohistan island arc and the Nanga Parbat-Haramosh Massif, Pakistan Himalaya: *Geological Society, London, Special Publications*, v. 74, no. 1, p. 173–191, doi: 10.1144/GSL.SP.1993.074.01.13.
- Honegger, K., Dietrich, V., Frank, W., Gansser, A., Thöni, M., and Trommsdorff, V., 1982, Magmatism and metamorphism in the Ladakh Himalayas (the Indus-Tsangpo suture zone): *Earth and Planetary Science Letters*, v. 60, no. 2, p. 253–292.
- Imayama, T., and Arita, K., 2008, Nd isotopic data reveal the material and tectonic nature of the Main Central Thrust zone in Nepal Himalaya: *Tectonophysics*, v. 451, no. 1-4, p. 265–281, doi: 10.1016/j.tecto.2007.11.051.
- Inger, S., and Harris, N.B.W., 1993, Geochemical constraints on leucogranite magmatism in the Langtang Valley, Nepal Himalaya: *Journal of Petrology*, v. 34, p. 345–368.
- Jagoutz, O., Muntener, O., Burg, J., Ulmer, P., and Jagoutz, E., 2006, Lower continental crust formation through focused flow in km-scale melt conduits: The zoned ultramafic bodies of the Chilas Complex in the Kohistan island arc (NW Pakistan): *Earth and Planetary Science Letters*, v. 242, no. 3-4, p. 320–342, doi: 10.1016/j.epsl.2005.12.005.
- Khan, M.A., Stern, R.J., and Gribble, R.F., 1997, Geochemical and isotopic constraints on subduction polarity, magma sources, and palaeogeography of the Kohistan intra-oceanic arc, northern Pakistan Himalaya: *Journal of the Geological Society*, v. 154, no. 6, p. 935–946, doi: 10.1144/gsjgs.154.6.0935.
- Khan, S.D., Stern, R.J., Manton, M.I., COPELAND, P., and Kimura, J.I., 2004, Age, geochemical and Sr–Nd–Pb isotopic constraints for mantle source characteristics and petrogenesis of Teru Volcanics, Northern Kohistan Terrane: *Tectonophysics*, v. 393, p. 263–280, doi: 10.1016/j.tecto.2004.07.038.
- Khan, S.D., Walker, D.J., Hall, S.A., Burke, K.C., Shah, M.T., and Stockli, L., 2009, Did the Kohistan-Ladakh island arc collide first with India?: *Geological Society of America Bulletin*, v. 121, no. 3-4, p. 366–384.
- Mahéo, G., Blichert-Toft, J., Pin, C., and Guillot, S., 2009, Partial melting of mantle and crustal sources beneath South Karakorum, Pakistan: implications for the Miocene geodynamic evolution of the India–Asia convergence ....: *Journal of Petrology*, v. 50, p. 427–449, doi: 10.1093/petrology/egp006.
- Martin, A.J., DeCelles, P.G., Gehrels, G.E., Patchett, P.J., and Isachsen, C., 2005, Isotopic and structural constraints on the location of the Main Central thrust in the Annapurna Range, central Nepal Himalaya: *Geological Society of America Bulletin*, v. 117, no. 7-8, p. 926–944.

Miller, C., Thöni, M., Frank, W., Grasemann, B., KLÖTZLI, U., GUNTLI, P., and DRAGANITS, E., 2001, The early Palaeozoic magmatic event in the Northwest Himalaya, India: source, tectonic setting and age of emplacement: *Geological Magazine*, v. 138, no. 03, p. 237–251, doi: 10.1017/S0016756801005283.

Myrow, P.M., Hughes, N.C., Paulsen, T.S., Williams, I.S., Parcha, S.K., Thompson, K.R., Bowring, S.A., Peng, S.-C., and Ahluwalia, A.D., 2003, Integrated tectonostratigraphic analysis of the Himalaya and implications for its tectonic reconstruction: *Earth and Planetary Science Letters*, v. 212, no. 3, p. 433–441.

Parrish, R.R., and Hodges, K.V., 1996, Isotopic constraints on the age and provenance of the Lesser and Greater Himalayan sequences, Nepalese Himalaya: *Geological Society of America Bulletin*, v. 108, no. 7, p. 904–911, doi: 10.1130/0016-7606(1996)108<0904:ICOTAA>2.3.CO;2.

Petterson, M.G., and Windley, B.F., 1985, RbSr dating of the Kohistan arc-batholith in the Trans-Himalaya of north Pakistan, and tectonic implications: *Earth and Planetary Science Letters*, v. 74, no. 1, p. 45–57, doi: 10.1016/0012-821X(85)90165-7.

Reichardt, H., Weinberg, R.F., Andersson, U.B., and Fanning, C.M., 2010, Hybridization of granitic magmas in the source: The origin of the Karakoram Batholith, Ladakh, NW India: *Lithos*, v. 116, no. 3-4, p. 249–272, doi: 10.1016/j.lithos.2009.11.013.

Richards, A., Argles, T., Harris, N.B.W., Parrish, R.R., Ahmad, T., DARBYSHIRE, F., and DRAGANITS, E., 2005, Himalayan architecture constrained by isotopic tracers from clastic sediments: *Earth and Planetary Science Letters*, v. 236, no. 3-4, p. 773–796, doi: 10.1016/j.epsl.2005.05.034.

Robinson, D.M., DeCelles, P.G., Patchett, P.J., and Garzione, C.N., 2001, The kinematic evolution of the Nepalese Himalaya interpreted from Nd isotopes: *Earth and Planetary Science Letters*, v. 192, p. 507–521.

Rolland, Y., Picard, C., Pecher, A., Lapierre, H., and Bosch, D., 2002, The cretaceous Ladakh arc of NW himalaya—slab melting and melt–mantle interaction during fast northward drift of Indian Plate: *Chemical Geology*, v. 182, p. 139–178.

Scaillet, B., France-Lanord, C., and Le Fort, P., 1990, Badrinath-Gangotri plutons (Garhwal, India): petrological and geochemical evidence for fractionation processes in a high Himalayan leucogranite: *Journal of Volcanology and Geothermal Research*, v. 44, p. 163–188.

Schärer, U., Copeland, P., Harrison, T.M., and Searle, M.P., 1990, Age, Cooling History, and Origin of Post-Collisional Leucogranites in the Karakoram Batholith; A Multi-System Isotope Study: *The Journal of Geology*, v. 98, no. 2, p. 233–251, doi: 10.2307/30063771.

Stern, C.R., Kligfield, R., and Schelling, D., 1989, The Bhagirathi leucogranite of the High Himalaya (Garhwal, India); Age, petrogenesis, and tectonic implications: *Geological Society of America Special Paper*, v. 232, p. 33–45.

Vidal, P., Cocherie, A., and Le Fort, P., 1982, Geochemical investigations of the origin of the Manaslu leucogranite (Himalaya, Nepal): *Geochimica et Cosmochimica Acta*, v. 46, no. 11, p. 2279–2292, doi: 10.1016/0016-7037(82)90201-0.

Whittington, A., Foster, G., Harris, N.B.W., Vance, D., and Ayres, M., 1999, Lithostratigraphic correlations in the western Himalaya—An isotopic approach: *Geology*, v. 27, no. 7, p. 585–588, doi: 10.1130/0091-7613(1999)027<0585:LCITWH>2.3.CO;2.
