# Supplementary material
Source: publisher figshare collection journal article supplement (https://gsapubs.figshare.com/articles/dataset/_/14582763)
Supplement: Supplementary file 5 [file 1]

Table DR13 Carbon and oxygen isotope record from pedogenic carbonates within the Indus River Basin

| Sample name       | Age (Ma) | $\delta^{13}\text{C}$<br>(PDB) | $\delta^{18}\text{O}$<br>(PDB) | Reference               |
|-------------------|----------|--------------------------------|--------------------------------|-------------------------|
| 9148 Gabhir Kas   | 15.93    | -9.1                           | -7.6                           | Quade and Cerling, 1995 |
| 9143 Gabhir Kas   | 15.21    | -9.2                           | -9.6                           | Quade and Cerling, 1995 |
| 9141 Gabhir Kas   | 15.21    | -10                            | -10.7                          | Quade and Cerling, 1995 |
| 9135 Gabhir Kas   | 14.4     | -10                            | -8.2                           | Quade and Cerling, 1995 |
| 9134 Gabhir Kas   | 14.38    | -10.6                          | -8.7                           | Quade and Cerling, 1995 |
| 9132 Gabhir Kas   | 14.35    | -11.4                          | -8.9                           | Quade and Cerling, 1995 |
| 7869 Gabhir Kas   | 13.87    | -9.7                           | -10.8                          | Quade and Cerling, 1995 |
| 7826 Gabhir Kas   | 13.6     | -9                             | -11.9                          | Quade and Cerling, 1995 |
| 7827 Gabhir Kas   | 13.63    | -9                             | -10.3                          | Quade and Cerling, 1995 |
| 7828 Gabhir Kas   | 13.67    | -9.2                           | -8.7                           | Quade and Cerling, 1995 |
| 7829 Gabhir Kas   | 13.69    | -9.8                           | -9.3                           | Quade and Cerling, 1995 |
| 7862 Gabhir Kas   | 13.27    | -9.4                           | -10.4                          | Quade and Cerling, 1995 |
| 7860 Gabhir Kas   | 12.64    | -9.5                           | -10.6                          | Quade and Cerling, 1995 |
| 7859 Gabhir Kas   | 12.31    | -9.2                           | -10.2                          | Quade and Cerling, 1995 |
| 7865 Gabhir Kas   | 12.2     | -9.9                           | -10.6                          | Quade and Cerling, 1995 |
| 7857 Gabhir Kas   | 11.91    | -9.9                           | -10.1                          | Quade and Cerling, 1995 |
| 7855 Gabhir Kas   | 11.47    | -9.3                           | -9.8                           | Quade and Cerling, 1995 |
| 7916 Gabhir Kas   | 11.38    | -10.6                          | -9.8                           | Quade and Cerling, 1995 |
| 7917? Gabhir Kas  | 11.02    | -9.6                           | -9.9                           | Quade and Cerling, 1995 |
| 7918 Gabhir Kas   | 10.85    | -10.7                          | -9.1                           | Quade and Cerling, 1995 |
| 7919 Gabhir Kas   | 10.39    | -10.5                          | -9.4                           | Quade and Cerling, 1995 |
| 7935 Gabhir Kas   | 10.21    | -10.5                          | -11.3                          | Quade and Cerling, 1995 |
| 7929 Gabhir Kas   | 10.05    | -10.3                          | -9.5                           | Quade and Cerling, 1995 |
| 7931 Gabhir Kas   | 10.02    | -9.4                           | -10.6                          | Quade and Cerling, 1995 |
| 7933 Gabhir Kas   | 9.9      | -8.7                           | -11                            | Quade and Cerling, 1995 |
| 7934 Gabhir Kas   | 9.78     | -11.3                          | -10.7                          | Quade and Cerling, 1995 |
| 9158 Kaulial Kas  | 9.15     | -12.6                          | -5.4                           | Quade and Cerling, 1995 |
| 9160 Kaulial Kas  | 9.04     | -10.6                          | -7.3                           | Quade and Cerling, 1995 |
| 9162 Kaulial Kas  | 8.97     | -12.9                          | -8.7                           | Quade and Cerling, 1995 |
| 9168 Kaulial Kas  | 8.63     | -11.8                          | -5.4                           | Quade and Cerling, 1995 |
| 9173 Kaulial Kas  | 8.34     | -11.5                          | -7.4                           | Quade and Cerling, 1995 |
| 9174 Kaulial Kas  | 8.06     | -8.9                           | -7                             | Quade and Cerling, 1995 |
| 9175 Kaulial Kas  | 8.11     | -11.6                          | -8.9                           | Quade and Cerling, 1995 |
| 9177 Kaulial Kas  | 7.74     | -8.6                           | -7.1                           | Quade and Cerling, 1995 |
| 9178 Kaulial Kas  | 7.63     | -8.6                           | -7.5                           | Quade and Cerling, 1995 |
| 9180 Kaulial Kas  | 7.59     | -7.5                           | -7.8                           | Quade and Cerling, 1995 |
| 9181 Kaulial Kas  | 7.52     | -10.2                          | -7.4                           | Quade and Cerling, 1995 |
| 9182 Kaulial Kas  | 7.48     | -9.5                           | -7.9                           | Quade and Cerling, 1995 |
| 9183 Kaulial Kas  | 7.37     | -3.6                           | -7.1                           | Quade and Cerling, 1995 |
| 9184 Kaulial Kas  | 7.27     | -10.1                          | -9.1                           | Quade and Cerling, 1995 |
| 9185 Kaulial Kas  | 7.1      | -7.9                           | -7.6                           | Quade and Cerling, 1995 |
| 9186a Kaulial Kas | 7.04     | -9.5                           | -7.3                           | Quade and Cerling, 1995 |

|                  |      |      |      |                         |
|------------------|------|------|------|-------------------------|
| 9186b            | 7.04 | -8.8 | -6.5 | Quade and Cerling, 1995 |
| 9187 Kaulial Kas | 6.99 | -7   | -6.8 | Quade and Cerling, 1995 |
| 8007 Mirpur      | 3.33 | 0.6  | -6.7 | Quade and Cerling, 1995 |
| 8012 Mirpur      | 3.28 | 0.9  | -5.5 | Quade and Cerling, 1995 |
| 8014 Mirpur      | 3.27 | 1.2  | -6.9 | Quade and Cerling, 1995 |
| 8016 Mirpur      | 3.24 | 0.7  | -7.8 | Quade and Cerling, 1995 |
| 8024 Mirpur      | 3.1  | 0.1  | -7.2 | Quade and Cerling, 1995 |
| 8037a Mirpur     | 2.89 | 2    | -7.2 | Quade and Cerling, 1995 |
| 8043 Mirpur      | 2.66 | 1.7  | -7.5 | Quade and Cerling, 1995 |
| 8051 Mirpur      | 2.55 | 1    | -6.2 | Quade and Cerling, 1995 |
| 8056 Mirpur      | 2.45 | -1.9 | -6.8 | Quade and Cerling, 1995 |
| 8065 Mirpur      | 2.14 | 0.4  | -6.2 | Quade and Cerling, 1995 |
| 8068 Mirpur      | 1.9  | 0.8  | -7   | Quade and Cerling, 1995 |
| 8075 Mirpur      | 1.5  | 2.6  | -6   | Quade and Cerling, 1995 |
| 8076 Mirpur      | 1.48 | 0.8  | -5   | Quade and Cerling, 1995 |
| 7905 Pabbi Hills | 1.76 | 1.8  | -4.7 | Quade and Cerling, 1995 |
| 9189 Pabbi Hills | 1.76 | 1.1  | -4.8 | Quade and Cerling, 1995 |
| 9190 Pabbi Hills | 1.76 | 2.3  | -5.5 | Quade and Cerling, 1995 |
| 9191 Pabbi Hills | 1.76 | 2.8  | -4.6 | Quade and Cerling, 1995 |
| 9192 Pabbi Hills | 1.64 | 1.3  | -5.8 | Quade and Cerling, 1995 |
| 9193 Pabbi Hills | 1.56 | 0.8  | -5.6 | Quade and Cerling, 1995 |
| 9194 Pabbi Hills | 1.54 | 2.1  | -5.8 | Quade and Cerling, 1995 |
| 9196 Pabbi Hills | 1.49 | 1.9  | -6.6 | Quade and Cerling, 1995 |
| 9197 Pabbi Hills | 1.43 | 0.2  | -6.3 | Quade and Cerling, 1995 |
| 9200 Pabbi Hills | 1.41 | -0.9 | -5.9 | Quade and Cerling, 1995 |
| 9201 Pabbi Hills | 1.37 | -0.8 | -6   | Quade and Cerling, 1995 |
| 9202 Pabbi Hills | 1.36 | 1.2  | -8.1 | Quade and Cerling, 1995 |
| 9203 Pabbi Hills | 1.26 | -0.1 | -7.9 | Quade and Cerling, 1995 |
| 9204 Pabbi Hills | 1.22 | 1.4  | -6.4 | Quade and Cerling, 1995 |
| 9205 Pabbi Hills | 1.18 | 1.3  | -5.2 | Quade and Cerling, 1995 |
| 9206 Pabbi Hills | 1.17 | 0.3  | -4.4 | Quade and Cerling, 1995 |
| 9207 Pabbi Hills | 1.16 | 1.3  | -5.2 | Quade and Cerling, 1995 |
| 9208 Pabbi Hills | 1.16 | 0.9  | -5.6 | Quade and Cerling, 1995 |
| 9209 Pabbi Hills | 1.15 | 2.5  | -6.6 | Quade and Cerling, 1995 |
| 9210 Pabbi Hills | 1.11 | 2.3  | -6.8 | Quade and Cerling, 1995 |
| 9211 Pabbi Hills | 1.1  | -0.1 | -6.1 | Quade and Cerling, 1995 |
| 9212 Pabbi Hills | 1.05 | -2.1 | -8.5 | Quade and Cerling, 1995 |
| 9216 Pabbi Hills | 0.77 | 1.9  | -6.5 | Quade and Cerling, 1995 |
| 9217 Pabbi Hills | 0.73 | 0.9  | -6.8 | Quade and Cerling, 1995 |
| 9718 Pabbi Hills | 0.69 | 1.6  | -6.1 | Quade and Cerling, 1995 |
| 9720 Pabbi Hills | 0.6  | 0.5  | -6.7 | Quade and Cerling, 1995 |
| 9721 Pabbi Hills | 0.54 | -2.4 | -9   | Quade and Cerling, 1995 |
| 9722 Pabbi Hills | 0.48 | 2.1  | -5.7 | Quade and Cerling, 1995 |
| 9733 Jalalpur    | 2.27 | 2.5  | -6.8 | Quade and Cerling, 1995 |
| 9730 Jalalpur    | 2.58 | -1.9 | -7.8 | Quade and Cerling, 1995 |
| 9701 Jalalpur    | 3.3  | 1.3  | -6.6 | Quade and Cerling, 1995 |
| 9698 Jalalpur    | 3.39 | 2    | -6.3 | Quade and Cerling, 1995 |
| 9694 Jalalpur    | 3.43 | 1.8  | -6.2 | Quade and Cerling, 1995 |

|               |       |       |      |                         |
|---------------|-------|-------|------|-------------------------|
| 9693 Jalalpur | 3.44  | 0.4   | -6.1 | Quade and Cerling, 1995 |
| 9689 Jalalpur | 3.5   | 1.8   | -6.5 | Quade and Cerling, 1995 |
| 9683 Jalalpur | 3.69  | -2    | -5.7 | Quade and Cerling, 1995 |
| 9669 Jalalpur | 3.74  | -1.9  | -7.2 | Quade and Cerling, 1995 |
| 9676 Jalalpur | 4.36  | 0.7   | -6.5 | Quade and Cerling, 1995 |
| 9671 Jalalpur | 4.68  | 0.6   | -7   | Quade and Cerling, 1995 |
| 9665 Jalalpur | 5.13  | -1    | -7.5 | Quade and Cerling, 1995 |
| 9663 Jalalpur | 5.77  | -0.7  | -8   | Quade and Cerling, 1995 |
| 9657 Jalalpur | 5.89  | 0.54  | -6.4 | Quade and Cerling, 1995 |
| 9655 Jalalpur | 5.91  | -2.3  | -4.9 | Quade and Cerling, 1995 |
| 9654 Jalalpur | 5.94  | 0.1   | -7.2 | Quade and Cerling, 1995 |
| 9652 Jalalpur | 5.98  | -1.3  | -4.9 | Quade and Cerling, 1995 |
| 9648 Jalalpur | 6.07  | -0.3  | -5.4 | Quade and Cerling, 1995 |
| 9646 Jalalpur | 6.13  | 0     | -6.9 | Quade and Cerling, 1995 |
| 9643 Jalalpur | 6.43  | -3.5  | -6.9 | Quade and Cerling, 1995 |
| 9640 Jalalpur | 6.59  | -1.4  | -7.4 | Quade and Cerling, 1995 |
| 9639 Jalalpur | 6.61  | -3    | -7.7 | Quade and Cerling, 1995 |
| 9637 Jalalpur | 6.76  | -0.7  | -6.3 | Quade and Cerling, 1995 |
| 9630 Jalalpur | 7.48  | -5    | -7.4 | Quade and Cerling, 1995 |
| 9625 Jalalpur | 7.92  | -7.9  | -7.9 | Quade and Cerling, 1995 |
| 9624 Jalalpur | 7.95  | -11.2 | -6.2 | Quade and Cerling, 1995 |
| 9622 Jalalpur | 7.98  | -8.8  | -8   | Quade and Cerling, 1995 |
| 9619 Jalalpur | 8.4   | -10.8 | -9   | Quade and Cerling, 1995 |
| 9613 Jalalpur | 9.27  | -11   | -9.9 | Quade and Cerling, 1995 |
| 9607 Jalalpur | 9.41  | -10   | -9.9 | Quade and Cerling, 1995 |
| 9611 Jalalpur | 9.64  | -10.1 | -9.7 | Quade and Cerling, 1995 |
| 9764 Jalalpur | 10.14 | -9.8  | -9.4 | Quade and Cerling, 1995 |
| 9762 Jalalpur | 10.6  | -9.9  | -8   | Quade and Cerling, 1995 |
| 9758 Jalalpur | 11.67 | -10.7 | -9.5 | Quade and Cerling, 1995 |
| 9757 Jalalpur | 12.23 | -10.8 | -8.8 | Quade and Cerling, 1995 |
| 9024 Rohtas   | 3.98  | 0.1   | -5.8 | Quade and Cerling, 1995 |
| 8083 Rohtas   | 4.3   | -1.2  | -6.9 | Quade and Cerling, 1995 |
| 8085 Rohtas   | 4.39  | -0.1  | -7.3 | Quade and Cerling, 1995 |
| 9796 Rohtas   | 4.49  | -0.8  | -6.8 | Quade and Cerling, 1995 |
| 8086 Rohtas   | 4.53  | -0.13 | -7.8 | Quade and Cerling, 1995 |
| 8088 Rohtas   | 4.56  | 2     | -6.3 | Quade and Cerling, 1995 |
| 8091 Rohtas   | 4.66  | 1.1   | -7.6 | Quade and Cerling, 1995 |
| 8092 Rohtas   | 4.78  | 0.8   | -7   | Quade and Cerling, 1995 |
| 8094 Rohtas   | 5.02  | -3.5  | -5.9 | Quade and Cerling, 1995 |
| 8095 Rohtas   | 5.2   | -5    | -8.5 | Quade and Cerling, 1995 |
| 9795 Rohtas   | 5.54  | -2.5  | -7.6 | Quade and Cerling, 1995 |
| 9793 Rohtas   | 5.74  | -9    | -8.7 | Quade and Cerling, 1995 |
| 9794 Rohtas   | 5.76  | -7    | -9.4 | Quade and Cerling, 1995 |
| 9792 Rohtas   | 5.78  | -10.2 | -8.7 | Quade and Cerling, 1995 |
| 9791 Rohtas   | 5.78  | -9.1  | -9.2 | Quade and Cerling, 1995 |
| 9005 Rohtas   | 6.08  | -10.1 | -7.9 | Quade and Cerling, 1995 |
| 9006 Rohtas   | 6.18  | -11   | -9.7 | Quade and Cerling, 1995 |
| 9754 Rohtas   | 6.22  | -11   | -9.9 | Quade and Cerling, 1995 |

|             |      |        |       |                           |
|-------------|------|--------|-------|---------------------------|
| 9008 Rohtas | 6.28 | -8.9   | -10.9 | Quade and Cerling, 1995   |
| 9009 Rohtas | 6.4  | -10.4  | -9.6  | Quade and Cerling, 1995   |
| 9020 Rohtas | 6.65 | -10.4  | -10.6 | Quade and Cerling, 1995   |
| 9019 Rohtas | 6.9  | -9.9   | -9.9  | Quade and Cerling, 1995   |
| ROT 94-26   | 7.99 | -9.12  | -9.6  | Behrensmeyer et al., 2007 |
| ROT 94-1    | 7.99 | -9.59  | -8.5  | Behrensmeyer et al., 2007 |
| ROT 94-8    | 7.99 | -9.93  | -8.9  | Behrensmeyer et al., 2007 |
| ROT94-4     | 7.99 | -9.79  | -9.5  | Behrensmeyer et al., 2007 |
| ROT 94-2    | 7.98 | -9.27  | -9    | Behrensmeyer et al., 2007 |
| ROT 121     | 7.98 | -8.62  | -8.91 | Behrensmeyer et al., 2007 |
| KB96-026    | 7.98 | -9.92  | -8.92 | Behrensmeyer et al., 2007 |
| ROT94-3     | 7.98 | -9.55  | -10.3 | Behrensmeyer et al., 2007 |
| ROT 94-6    | 7.98 | -9.39  | -8.8  | Behrensmeyer et al., 2007 |
| ROT 94-27   | 7.98 | -11.06 | -9.1  | Behrensmeyer et al., 2007 |
| ROT 94-73   | 7.98 | -10.42 | -8.9  | Behrensmeyer et al., 2007 |
| ROT 147     | 7.98 | -9.95  | -9.4  | Behrensmeyer et al., 2007 |
| ROT 94-9    | 7.98 | -10.2  | -9    | Behrensmeyer et al., 2007 |
| ROT 94-7    | 7.97 | -9.94  | -9.3  | Behrensmeyer et al., 2007 |
| ROT 94-74   | 7.97 | -11.2  | -8.6  | Behrensmeyer et al., 2007 |
| ROT-235-1   | 7.97 | -9.9   | -9.3  | Behrensmeyer et al., 2007 |
| ROT-235-2   | 7.97 | -9.8   | -9.1  | Behrensmeyer et al., 2007 |
| ROT-235-3   | 7.97 | -9.6   | -9.1  | Behrensmeyer et al., 2007 |
| ROT 94-71   | 7.97 | -12.03 | -8.6  | Behrensmeyer et al., 2007 |
| ROT 94-5    | 7.97 | -10.61 | -11.1 | Behrensmeyer et al., 2007 |
| ROT 152     | 7.97 | -11.3  | -7.04 | Behrensmeyer et al., 2007 |
| ROT 94-75   | 7.97 | -10.16 | -8.6  | Behrensmeyer et al., 2007 |
| ROT 94-72   | 7.97 | -9.66  | -8.8  | Behrensmeyer et al., 2007 |
| ROT-123n    | 7.94 | -9.51  | -9.42 | Behrensmeyer et al., 2007 |
| 9005        | 7.94 | -10.1  | -7.9  | Behrensmeyer et al., 2007 |
| ROT-149.n   | 7.93 | -10.72 | -7.55 | Behrensmeyer et al., 2007 |
| ROT 124     | 7.93 | -7.4   | -7.48 | Behrensmeyer et al., 2007 |
| ROT-125.n   | 7.92 | -10.13 | -8.2  | Behrensmeyer et al., 2007 |
| ROT-153.n   | 7.92 | -10.49 | -8.98 | Behrensmeyer et al., 2007 |
| ROT 76      | 7.9  | -10.22 | -9.54 | Behrensmeyer et al., 2007 |
| ROT 78L     | 7.9  | -10.03 | -9.86 | Behrensmeyer et al., 2007 |
| ROT 78K     | 7.89 | -9.89  | -9.41 | Behrensmeyer et al., 2007 |
| ROT 78K     | 7.89 | -10.36 | -9.5  | Behrensmeyer et al., 2007 |
| ROT 78J     | 7.89 | -10.41 | -9.13 | Behrensmeyer et al., 2007 |
| ROT 75      | 7.89 | -10.05 | -9.78 | Behrensmeyer et al., 2007 |
| ROT 141     | 7.86 | -9.01  | -8.88 | Behrensmeyer et al., 2007 |
| ROT-142     | 7.83 | -9.67  | -8.64 | Behrensmeyer et al., 2007 |
| ROT 136     | 7.8  | -11.28 | -7.32 | Behrensmeyer et al., 2007 |
| ROT-237.n   | 7.73 | -10.55 | -8.55 | Behrensmeyer et al., 2007 |
| ROT-234     | 7.72 | -9.74  | -9    | Behrensmeyer et al., 2007 |
| ROT 163     | 7.43 | -10.19 | -8.83 | Behrensmeyer et al., 2007 |
| ROT 165     | 7.07 | -6.79  | -8.35 | Behrensmeyer et al., 2007 |
| ROT 164     | 7.07 | -7.79  | -7.97 | Behrensmeyer et al., 2007 |
| ROT 161     | 7.01 | -7.45  | -7.58 | Behrensmeyer et al., 2007 |

|           |      |        |        |                           |
|-----------|------|--------|--------|---------------------------|
| ROT-160.n | 7    | -6.42  | -12.58 | Behrensmeyer et al., 2007 |
| KB96-003  | 6.78 | -5.86  | -8.24  | Behrensmeyer et al., 2007 |
| KB96-032  | 6.78 | -3.59  | -8.04  | Behrensmeyer et al., 2007 |
| KB96-033  | 6.78 | -4.88  | -8.19  | Behrensmeyer et al., 2007 |
| KB96-029  | 6.78 | -3.41  | -7.94  | Behrensmeyer et al., 2007 |
| KB96-004  | 6.78 | -4.21  | -8.17  | Behrensmeyer et al., 2007 |
| KB96-005  | 6.78 | -4.6   | -8.85  | Behrensmeyer et al., 2007 |
| KB96-028  | 6.78 | -5.06  | -8.29  | Behrensmeyer et al., 2007 |
| KB96-030  | 6.78 | -4.48  | -7.97  | Behrensmeyer et al., 2007 |
| KB96-034  | 6.77 | -7.66  | -8.92  | Behrensmeyer et al., 2007 |
| ROT 16    | 6.77 | -3.27  | -8.24  | Behrensmeyer et al., 2007 |
| ROT 17    | 6.77 | -3.74  | -8.5   | Behrensmeyer et al., 2007 |
| ROT-36n   | 6.77 | -7.83  | -9.43  | Behrensmeyer et al., 2007 |
| ROT 71    | 6.77 | -3.9   | -7.27  | Behrensmeyer et al., 2007 |
| ROT-225   | 6.77 | -2.68  | -7.36  | Behrensmeyer et al., 2007 |
| 9795      | 6.77 | -2.5   | -7.6   | Behrensmeyer et al., 2007 |
| ROT-37    | 6.76 | -2.34  | -7.52  | Behrensmeyer et al., 2007 |
| ROT 27    | 6.76 | -5.85  | -9.16  | Behrensmeyer et al., 2007 |
| ROT 26    | 6.76 | -7.33  | -9.73  | Behrensmeyer et al., 2007 |
| ROT-227   | 6.76 | -3.29  | -7.4   | Behrensmeyer et al., 2007 |
| ROT 28    | 6.76 | -2.53  | -8.06  | Behrensmeyer et al., 2007 |
| ROT 53    | 6.76 | -8.96  | -8.71  | Behrensmeyer et al., 2007 |
| ROT 94-58 | 6.75 | -7.04  | -8.1   | Behrensmeyer et al., 2007 |
| ROT 29    | 6.75 | -7.49  | -7.22  | Behrensmeyer et al., 2007 |
| ROT 29    | 6.75 | -5.99  | -7.14  | Behrensmeyer et al., 2007 |
| ROT 51    | 6.75 | -4.26  | -7.1   | Behrensmeyer et al., 2007 |
| ROT-51.n  | 6.75 | -7.19  | -8.1   | Behrensmeyer et al., 2007 |
| ROT 94-69 | 6.75 | -8.02  | -8.2   | Behrensmeyer et al., 2007 |
| ROT 94-70 | 6.75 | -8.9   | -8.2   | Behrensmeyer et al., 2007 |
| ROT 94-56 | 6.75 | -5.18  | -8.2   | Behrensmeyer et al., 2007 |
| KB96-038  | 6.75 | -8.6   | -8.5   | Behrensmeyer et al., 2007 |
| KB96-035  | 6.75 | -9.66  | -8.56  | Behrensmeyer et al., 2007 |
| ROT 94-14 | 6.75 | -4.87  | -7.7   | Behrensmeyer et al., 2007 |
| ROT 94-37 | 6.74 | -7.81  | -8.2   | Behrensmeyer et al., 2007 |
| ROT-73n   | 6.74 | -6.39  | -7.91  | Behrensmeyer et al., 2007 |
| ROT-52    | 6.74 | -4.03  | -7.59  | Behrensmeyer et al., 2007 |
| ROT 94-38 | 6.74 | -8.57  | -9.6   | Behrensmeyer et al., 2007 |
| ROT 54    | 6.74 | -4     | -7.93  | Behrensmeyer et al., 2007 |
| ROT 94-16 | 6.74 | -10.11 | -7.9   | Behrensmeyer et al., 2007 |
| ROT 94-40 | 6.74 | -8.17  | -8.6   | Behrensmeyer et al., 2007 |
| ROT 94-41 | 6.74 | -9.72  | -9.8   | Behrensmeyer et al., 2007 |
| ROT 94-13 | 6.74 | -4.95  | -7.9   | Behrensmeyer et al., 2007 |
| ROT 94-23 | 6.74 | -8.43  | -7.4   | Behrensmeyer et al., 2007 |
| ROT 49    | 6.74 | -2.82  | -7.28  | Behrensmeyer et al., 2007 |
| ROT 94-43 | 6.74 | -8.37  | -9.5   | Behrensmeyer et al., 2007 |
| ROT 94-18 | 6.74 | -2.2   | -6     | Behrensmeyer et al., 2007 |
| ROT 94-11 | 6.74 | -4.44  | -7.7   | Behrensmeyer et al., 2007 |
| ROT 94-44 | 6.74 | -9.05  | -10    | Behrensmeyer et al., 2007 |

|            |      |        |        |                           |
|------------|------|--------|--------|---------------------------|
| ROT 94-29  | 6.74 | -9.34  | -9.3   | Behrensmeyer et al., 2007 |
| ROT 94-24  | 6.74 | -1.07  | -6.1   | Behrensmeyer et al., 2007 |
| ROT 94-35  | 6.74 | -5.29  | -7.6   | Behrensmeyer et al., 2007 |
| ROT 94-57  | 6.74 | -8.01  | -8.5   | Behrensmeyer et al., 2007 |
| ROT 94-21  | 6.74 | -8.52  | -8.4   | Behrensmeyer et al., 2007 |
| ROT 94-30  | 6.74 | -8.24  | -8.5   | Behrensmeyer et al., 2007 |
| RJF-N      | 6.74 | -8.48  | -6.28  | Behrensmeyer et al., 2007 |
| RJF-O      | 6.74 | -7.72  | -7.17  | Behrensmeyer et al., 2007 |
| RJF-P      | 6.73 | -8.75  | -9.5   | Behrensmeyer et al., 2007 |
| RJF-L      | 6.73 | -8.04  | -9.66  | Behrensmeyer et al., 2007 |
| RJF-M      | 6.73 | -8.66  | -10.3  | Behrensmeyer et al., 2007 |
| RJF-H      | 6.73 | -9.81  | -8.7   | Behrensmeyer et al., 2007 |
| RJF-I      | 6.73 | -8.85  | -9.3   | Behrensmeyer et al., 2007 |
| RJF-J      | 6.73 | -9.77  | -8.3   | Behrensmeyer et al., 2007 |
| RJF-G      | 6.73 | -7.9   | -9.44  | Behrensmeyer et al., 2007 |
| RJF-C      | 6.73 | -9.24  | -9.3   | Behrensmeyer et al., 2007 |
| RJF-E      | 6.73 | -8.54  | -9.1   | Behrensmeyer et al., 2007 |
| RJF-F      | 6.73 | -8.13  | -8.9   | Behrensmeyer et al., 2007 |
| RJF-A      | 6.73 | -8.16  | -9.8   | Behrensmeyer et al., 2007 |
| RJF-B      | 6.73 | -8.53  | -9.5   | Behrensmeyer et al., 2007 |
| RJF-D      | 6.73 | -8.31  | -9.1   | Behrensmeyer et al., 2007 |
| ROT 32     | 6.73 | -2.47  | -7.47  | Behrensmeyer et al., 2007 |
| ROT 66     | 6.72 | -7.87  | -8.34  | Behrensmeyer et al., 2007 |
| ROT 59     | 6.72 | -2.61  | -6.38  | Behrensmeyer et al., 2007 |
| ROT 68     | 6.72 | -8.84  | -9.8   | Behrensmeyer et al., 2007 |
| ROT 114    | 6.23 | -5.79  | -5.36  | Behrensmeyer et al., 2007 |
| KB96-057   | 5.78 | -5.11  | -8.24  | Behrensmeyer et al., 2007 |
| ROT 94-64r | 5.78 | -7.12  | -7.5   | Behrensmeyer et al., 2007 |
| ROT 94-65  | 5.78 | -8.65  | -8.8   | Behrensmeyer et al., 2007 |
| ROT 94-64  | 5.78 | -9.63  | -9.8   | Behrensmeyer et al., 2007 |
| KB96-058   | 5.78 | -3.54  | -9.08  | Behrensmeyer et al., 2007 |
| ROT 94-60  | 5.78 | -9.78  | -9.7   | Behrensmeyer et al., 2007 |
| ROT 92     | 5.78 | -10.54 | -9.37  | Behrensmeyer et al., 2007 |
| ROT 94-66  | 5.78 | -8.07  | -8.7   | Behrensmeyer et al., 2007 |
| ROT 94-66  | 5.78 | -9.4   | -9.2   | Behrensmeyer et al., 2007 |
| KB96-059   | 5.78 | 0.13   | -6.6   | Behrensmeyer et al., 2007 |
| ROT 94-61r | 5.78 | -8.39  | -9.4   | Behrensmeyer et al., 2007 |
| ROT 94-67  | 5.78 | -8.14  | -9     | Behrensmeyer et al., 2007 |
| ROT 94-61  | 5.78 | -8.3   | -8.7   | Behrensmeyer et al., 2007 |
| KB96-060   | 5.78 | -6.75  | -10.98 | Behrensmeyer et al., 2007 |
| ROT-82n    | 5.75 | -6.47  | -6.47  | Behrensmeyer et al., 2007 |
| KB96-043   | 4.91 | -0.16  | -7.68  | Behrensmeyer et al., 2007 |
| KB96-044   | 4.9  | 1.1    | -6.9   | Behrensmeyer et al., 2007 |
| KB96-045   | 4.86 | -1.09  | -7.96  | Behrensmeyer et al., 2007 |
| KB96-047   | 4.86 | 1.48   | -6.64  | Behrensmeyer et al., 2007 |
| KB96-061   | 4.86 | 0.64   | -7.5   | Behrensmeyer et al., 2007 |
| KB96-046   | 4.86 | 0.91   | -6.82  | Behrensmeyer et al., 2007 |
| KB96-067   | 4.85 | 0.41   | -7.1   | Behrensmeyer et al., 2007 |

|            |      |       |       |                           |
|------------|------|-------|-------|---------------------------|
| KB96-075   | 4.85 | 0.38  | -7.14 | Behrensmeyer et al., 2007 |
| KB96-077   | 4.85 | 0.61  | -6.84 | Behrensmeyer et al., 2007 |
| ROT 212    | 4.85 | -0.12 | -6.2  | Behrensmeyer et al., 2007 |
| ROT 206    | 4.85 | 0.41  | -6.69 | Behrensmeyer et al., 2007 |
| KB96-065   | 4.85 | -0.27 | -6.63 | Behrensmeyer et al., 2007 |
| KB96-071   | 4.85 | -0.21 | -6.25 | Behrensmeyer et al., 2007 |
| KB96-074   | 4.85 | -0.51 | -6.45 | Behrensmeyer et al., 2007 |
| KB96-064   | 4.85 | -2.07 | -6.62 | Behrensmeyer et al., 2007 |
| KB96-076   | 4.85 | -2.13 | -6.73 | Behrensmeyer et al., 2007 |
| KB96-070   | 4.85 | -2.24 | -6.71 | Behrensmeyer et al., 2007 |
| KB96-048   | 4.85 | -0.17 | -6.13 | Behrensmeyer et al., 2007 |
| ROT 207    | 4.85 | -3.56 | -6.34 | Behrensmeyer et al., 2007 |
| KB96-069   | 4.85 | -1.61 | -6.36 | Behrensmeyer et al., 2007 |
| KB96-063   | 4.85 | -1    | -6.08 | Behrensmeyer et al., 2007 |
| KB96-073   | 4.85 | -1.68 | -6.22 | Behrensmeyer et al., 2007 |
| ROT 216    | 4.85 | -4.58 | -9.38 | Behrensmeyer et al., 2007 |
| KB96-068   | 4.85 | -6.37 | -7.36 | Behrensmeyer et al., 2007 |
| KB96-072   | 4.85 | -3.91 | -6.75 | Behrensmeyer et al., 2007 |
| KB96-062   | 4.85 | -2.68 | -6.56 | Behrensmeyer et al., 2007 |
| KB96-050   | 4.84 | -8.53 | -6.59 | Behrensmeyer et al., 2007 |
| ROT 209    | 4.8  | 0.67  | -6.19 | Behrensmeyer et al., 2007 |
| KB96-051   | 4.79 | -2.31 | -8.11 | Behrensmeyer et al., 2007 |
| KB96-008   | 4.78 | -3.54 | -8.81 | Behrensmeyer et al., 2007 |
| KB96-052   | 4.78 | -2.91 | -7.59 | Behrensmeyer et al., 2007 |
| KB96-056   | 4.74 | -2.63 | -6.56 | Behrensmeyer et al., 2007 |
| 9006       | 4.79 | -11   | -9.7  | Behrensmeyer et al., 2007 |
| R-8        | 2.63 | 0.5   | -7.4  | Behrensmeyer et al., 2007 |
| ROT 172    | 2.42 | 1.42  | -6.3  | Behrensmeyer et al., 2007 |
| ROT 175    | 2.42 | 1.42  | -5.9  | Behrensmeyer et al., 2007 |
| ROT 171    | 2.42 | 1.62  | -6.18 | Behrensmeyer et al., 2007 |
| ROT 187    | 2.42 | 1.36  | -3.86 | Behrensmeyer et al., 2007 |
| ROT-182n   | 2.42 | 2.65  | -5.8  | Behrensmeyer et al., 2007 |
| ROT 184    | 2.42 | 3.44  | -6.61 | Behrensmeyer et al., 2007 |
| ROT 188    | 2.42 | 3.42  | -6.7  | Behrensmeyer et al., 2007 |
| ROT 184    | 2.42 | 2.33  | -6.46 | Behrensmeyer et al., 2007 |
| ROT 183    | 2.42 | 2.25  | -6.76 | Behrensmeyer et al., 2007 |
| ROT 104H   | 2.28 | 1.77  | -6.02 | Behrensmeyer et al., 2007 |
| ROT-104En2 | 2.28 | 1.18  | -4.87 | Behrensmeyer et al., 2007 |
| ROT 104F   | 2.28 | 2.05  | -2.78 | Behrensmeyer et al., 2007 |
| ROT 104D   | 2.28 | 0.99  | -5.21 | Behrensmeyer et al., 2007 |
| H1/4       | 2.96 | -3.0  | -4.1  | Ghosh et al., 2004        |
| LH2/2      | 2.98 | -1.5  | -11.4 | Ghosh et al., 2004        |
| LH2/3      | 2.98 | 0.1   | -6.9  | Ghosh et al., 2004        |
| HL2/6      | 2.99 | 1.5   | -6.1  | Ghosh et al., 2004        |
| HL2/4      | 2.99 | -1.3  | -5.7  | Ghosh et al., 2004        |
| LH2/5      | 2.99 | -1.6  | -8.2  | Ghosh et al., 2004        |
| H10/3      | 3.2  | -1.2  | -9.6  | Ghosh et al., 2004        |
| HL10/1     | 3.2  | -1.0  | -11.4 | Ghosh et al., 2004        |

|         |      |      |       |                    |
|---------|------|------|-------|--------------------|
| HL10/2  | 3.2  | -1.8 | -9    | Ghosh et al., 2004 |
| HL11    | 3.21 | 0.6  | -9.5  | Ghosh et al., 2004 |
| HL21    | 3.39 | 2.0  | -6.6  | Ghosh et al., 2004 |
| J2/1    | 3.85 | -2.1 | -8.1  | Ghosh et al., 2004 |
| J2/2    | 3.85 | -2.8 | -8.1  | Ghosh et al., 2004 |
| J2/3    | 3.85 | -3.3 | -7.1  | Ghosh et al., 2004 |
| J6/1    | 3.96 | -0.8 | -8.5  | Ghosh et al., 2004 |
| J6/2    | 3.96 | -1.3 | -8.9  | Ghosh et al., 2004 |
| J6/3    | 3.96 | -3.2 | -9    | Ghosh et al., 2004 |
| J6c     | 3.96 | -6.7 | -10.8 | Ghosh et al., 2004 |
| J7/b    | 4    | -2.8 | -7.1  | Ghosh et al., 2004 |
| J7/1    | 4    | -5.8 | -8.2  | Ghosh et al., 2004 |
| J7/2    | 4    | -1.4 | -7.9  | Ghosh et al., 2004 |
| J7/3    | 4    | -1.8 | -8.7  | Ghosh et al., 2004 |
| J7/4    | 4    | -2.6 | -8.1  | Ghosh et al., 2004 |
| J7/5    | 4    | -4.9 | -7    | Ghosh et al., 2004 |
| J7/6    | 4    | -7.1 | -7.3  | Ghosh et al., 2004 |
| J7/7    | 4    | -9.3 | -6.3  | Ghosh et al., 2004 |
| J11/1   | 4.14 | -5.6 | -8.3  | Ghosh et al., 2004 |
| J11/2   | 4.14 | -7.5 | -6.6  | Ghosh et al., 2004 |
| J11/3   | 4.14 | -6.1 | -6.8  | Ghosh et al., 2004 |
| J16/1/1 | 4.34 | -1.2 | -9.3  | Ghosh et al., 2004 |
| J16/1/2 | 4.34 | -2.2 | -7.8  | Ghosh et al., 2004 |
| J16/1/3 | 4.35 | -2.1 | -10.1 | Ghosh et al., 2004 |
| J16/1/4 | 4.35 | -2.4 | -8.4  | Ghosh et al., 2004 |
| J16/2   | 4.35 | 0.7  | -8    | Ghosh et al., 2004 |
| J16/9   | 4.36 | -3.1 | -7.9  | Ghosh et al., 2004 |
| J16/10  | 4.36 | -2.3 | -7.5  | Ghosh et al., 2004 |
| J17/1   | 4.43 | -3.3 | -7.4  | Ghosh et al., 2004 |
| J25/2   | 4.9  | 2.4  | -6.8  | Ghosh et al., 2004 |
| J25/3   | 4.9  | -0.5 | -5.3  | Ghosh et al., 2004 |
| J25/6   | 4.92 | 2.9  | -6.7  | Ghosh et al., 2004 |
| J26/2   | 4.98 | -0.2 | -7.2  | Ghosh et al., 2004 |
| K0/1    | 5.29 | 1.6  | -6.5  | Ghosh et al., 2004 |
| K0/2    | 5.36 | -3.0 | -7    | Ghosh et al., 2004 |
| KS-1    | 5.36 | 0.4  | -6.5  | Ghosh et al., 2004 |
| K4/2    | 5.49 | 0.1  | -7.5  | Ghosh et al., 2004 |
| K7/1    | 5.49 | 0.0  | -6.9  | Ghosh et al., 2004 |
| K7/2    | 5.49 | 0.2  | -6.7  | Ghosh et al., 2004 |
| K10/1   | 5.49 | 0.0  | -7.2  | Ghosh et al., 2004 |
| K10/3   | 5.49 | -1.8 | -6.7  | Ghosh et al., 2004 |
| K11/1   | 5.61 | 1.6  | -6.3  | Ghosh et al., 2004 |
| K11/2   | 5.84 | -2.0 | -6.6  | Ghosh et al., 2004 |
| K11/3   | 5.85 | -0.4 | -6.6  | Ghosh et al., 2004 |
| K11/5   | 5.98 | -4.0 | -10.6 | Ghosh et al., 2004 |
| K11/6   | 5.98 | -2.0 | -8.8  | Ghosh et al., 2004 |
| KS-13-2 | 5.99 | -5.9 | -12.1 | Ghosh et al., 2004 |
| K14/3   | 5.99 | -8.0 | -10.5 | Ghosh et al., 2004 |



|       |      |      |      |                    |
|-------|------|------|------|--------------------|
| KS-16 | 5.17 | -0.3 | -8.4 | Ghosh et al., 2004 |
| K20/1 | 5.18 | -0.2 | -6.4 | Ghosh et al., 2004 |
| K20/2 | 5.47 | -4.9 | -8   | Ghosh et al., 2004 |
| K26/2 | 5.47 | -2.6 | -8   | Ghosh et al., 2004 |
| K26/3 | 5.24 | -7.4 | -8.2 | Ghosh et al., 2004 |
| K26/4 | 5.59 | -4.8 | -9.6 | Ghosh et al., 2004 |
| K26/5 | 5.72 | -9.6 | -6.4 | Ghosh et al., 2004 |
| KS-29 | 6.32 | -5.8 | -7.3 | Ghosh et al., 2004 |

---

## References

Quade, J., and Cerling, T.E., 1995, Expansion of C4 grasses in the Late Miocene of Northern Pakistan: evidence from stable isotopes in paleosols: *Palaeogeography, palaeoclimatology, palaeoecology*, v. 115, no. 1-4, p. 91–116, doi: 10.1016/0031-0182(94)00108-K.

Ghosh, P., Padia, J.T., and Mohindra, R., 2004, Stable isotopic studies of palaeosol sediment from Upper Siwalik of Himachal Himalaya: evidence for high monsoonal intensity during late Miocene?: *Palaeogeography, palaeoclimatology, palaeoecology*, v. 206, no. 1-2, p. 103–114, doi: 10.1016/j.palaeo.2004.01.014.

Behrensmeyer, A.K., Quade, J., Cerling, T.E., Kappelman, J., Khan, I.A., COPELAND, P., Roe, L., Hicks, J., Stubblefield, P., Willis, B.J., and Latorre, C., 2007, The structure and rate of late Miocene expansion of C4 plants: Evidence from lateral variation in stable isotopes in paleosols of the Siwalik Group, northern Pakistan: *Geological Society of America Bulletin*, v. 119, no. 11-12, p. 1486–1505, doi: 10.1130/B26064.1.
